# Supplementary material for: A full-proteome, interaction-specific characterization of mutational hotspots across human cancers
Source: HighWire-hosted journal article supplement (doi:10.1101/gr.275437.121), 2021-12-28
Supplement: Supplemental_Table_4_JD_edit.xlsx [file Supplemental_Table_4_JD_edit.xlsx]

## Sheet: Legend
Supplemental Table 4: Cancer-type-specific hotspots and hotspot-affected interactions (.xlsx)
The table provides full lists of cancer-type-specific (1) hotspots and (2) hotspot-affected interactions, which categorizes the hotspot/interaction based on whether it is involved in more than one cancer types (“Single-cancer” versus “Multi-cancer”); (3) lists the frequency of hotspots mutated in each cancer type; (4) lists common cancer types shared between pairs of hotspots.

## Sheet: Cancer-type-specific_hotspots
Gene	Hotspot	Cancer_types	Category
ACVR1	R206	uterus	Single-cancer
ACVR1	R258	cnsbrain	Single-cancer
ACVR1	G328	cnsbrain	Single-cancer
AKT1	L52	breast	Single-cancer
AKT1	E17	bladder,bowel,breast,cervix,esophagusstomach,headandneck,lung,prostate,thyroid,uterus	Multi-cancer
ALK	F1174	cnsbrain	Single-cancer
ALK	F1245	cnsbrain	Single-cancer
ALK	R1275	cnsbrain	Single-cancer
ALK	R401	bowel	Single-cancer
ANKRD11	K369	testis	Single-cancer
APC	Q1429	bowel	Single-cancer
APC	Q1406	bowel	Single-cancer
APC	Q1367	bowel	Single-cancer
AR	T877	prostate	Single-cancer
AR	L701	prostate	Single-cancer
AR	H874	prostate	Single-cancer
AR	W741	prostate	Single-cancer
ARAF	S214	lung	Single-cancer
ARAF	P216	biliarytract	Single-cancer
ARID1A	G2087	esophagusstomach	Single-cancer
ARID1A	R1989	bowel,uterus	Multi-cancer
ARID1A	R1276	uterus	Single-cancer
ARID1B	T1639	skin	Single-cancer
ARID1B	G953	pancreas	Single-cancer
ARID1B	Q1166	skin	Single-cancer
ARID2	S297	skin	Single-cancer
ARID2	R314	skin	Single-cancer
ASXL2	E330	bladder	Single-cancer
ASXL2	M1	bowel	Single-cancer
ATM	R250	bowel	Single-cancer
ATM	N2875	prostate	Single-cancer
ATM	R3008	bowel	Single-cancer
ATM	R337	bowel	Single-cancer
AXL	A273	bladder	Single-cancer
B2M	L7	lymph,skin	Multi-cancer
B2M	M1	esophagusstomach,headandneck,lung,lymph,ovaryfallopiantube,skin,uterus	Multi-cancer
B2M	L12	lymph	Single-cancer
BCL10	E178	pancreas	Single-cancer
BCL10	N173	pancreas	Single-cancer
BCL2	A131	lymph	Single-cancer
BCL2	G33	lymph	Single-cancer
BCL2	K22	lymph	Single-cancer
BCL6	R594	bowel	Single-cancer
BCOR	N1459	lung,uterus	Multi-cancer
BRAF	G469	blood,bowel,lung,skin	Multi-cancer
BRAF	L597	skin	Single-cancer
BRAF	G466	blood,bowel,lung	Multi-cancer
BRAF	K601	lung,lymph,prostate,skin,thyroid	Multi-cancer
BRAF	L485	bladder	Single-cancer
BRAF	G596	lung	Single-cancer
BRAF	D594	bladder,blood,bowel,lung,skin	Multi-cancer
BRAF	V600	biliarytract,bladder,blood,bowel,cnsbrain,lung,ovaryfallopiantube,pancreas,skin,thyroid	Multi-cancer
BRAF	N581	bowel,lung,ovaryfallopiantube,skin	Multi-cancer
BRCA2	S2303	skin	Single-cancer
BRD4	P1065	skin	Single-cancer
CARD11	E93	lymph	Single-cancer
CARD11	R423	bowel	Single-cancer
CARD11	L251	lymph	Single-cancer
CARD11	R337	lymph	Single-cancer
CARD11	E626	lymph	Single-cancer
CARD11	D401	lymph	Single-cancer
CARD11	K215	lymph	Single-cancer
CARD11	D357	lymph	Single-cancer
CBFB	M1	breast	Single-cancer
CCND1	Y44	lymph	Single-cancer
CCND1	T286	uterus	Single-cancer
CCND1	C47	lymph	Single-cancer
CCND1	P287	uterus	Single-cancer
CCND3	I290	lymph	Single-cancer
CD79B	Y196	lymph	Single-cancer
CDH1	D254	esophagusstomach	Single-cancer
CDH1	R335	breast	Single-cancer
CDH1	Y190	esophagusstomach	Single-cancer
CDH1	D288	esophagusstomach	Single-cancer
CDH1	R63	breast	Single-cancer
CDK12	R890	bowel	Single-cancer
CDK4	K22	skin	Single-cancer
CDK4	R24	lung,skin	Multi-cancer
CDKN1A	M1	liver	Single-cancer
CDKN2A	L130	pancreas,skin	Multi-cancer
CDKN2A	R80	bladder,bowel,esophagusstomach,headandneck,lung,pancreas,skin	Multi-cancer
CDKN2A	Q50	pancreas,skin	Multi-cancer
CDKN2A	P114	headandneck,skin	Multi-cancer
CDKN2A	D108	bladder,headandneck,lung	Multi-cancer
CDKN2A	H83	biliarytract,bladder,breast,esophagusstomach,headandneck,lung,pancreas,skin	Multi-cancer
CDKN2A	D84	esophagusstomach,lung	Multi-cancer
CDKN2A	P48	skin	Single-cancer
CDKN2A	E88	headandneck,skin	Multi-cancer
CDKN2A	E120	headandneck	Single-cancer
CIC	R1515	cnsbrain	Single-cancer
CIC	R215	cnsbrain	Single-cancer
CIC	S231	cnsbrain	Single-cancer
CIC	W238	cnsbrain	Single-cancer
CIC	R202	cnsbrain	Single-cancer
CIC	R1512	cnsbrain	Single-cancer
CIC	R201	cnsbrain	Single-cancer
CIC	P203	cnsbrain	Single-cancer
CIC	N205	cnsbrain	Single-cancer
CREBBP	W1502	lymph	Single-cancer
CREBBP	R1446	bladder,headandneck,lymph	Multi-cancer
CREBBP	L1499	lymph	Single-cancer
CREBBP	Y1503	lymph	Single-cancer
CTCF	Y226	breast	Single-cancer
CTCF	H284	breast	Single-cancer
CTCF	H288	breast	Single-cancer
CTCF	R377	uterus	Single-cancer
CTLA4	T17	pancreas	Single-cancer
CTNNB1	K335	liver	Single-cancer
CTNNB1	H36	liver	Single-cancer
CTNNB1	S45	adrenalgland,biliarytract,bladder,bowel,liver,lung,pancreas,prostate,skin	Multi-cancer
CTNNB1	S33	bladder,cnsbrain,esophagusstomach,liver,lung,ovaryfallopiantube,prostate,uterus	Multi-cancer
CTNNB1	G34	adrenalgland,cnsbrain,liver,lung,uterus	Multi-cancer
CTNNB1	W383	bowel	Single-cancer
CTNNB1	R535	esophagusstomach	Single-cancer
CTNNB1	T41	ampullaofvater,bowel,liver,lung,prostate,skin,softtissue,uterus	Multi-cancer
CTNNB1	S37	bladder,cnsbrain,esophagusstomach,liver,lung,prostate,uterus	Multi-cancer
CTNNB1	N387	liver	Single-cancer
CTNNB1	I35	liver,uterus	Multi-cancer
CTNNB1	D32	cervix,cnsbrain,esophagusstomach,liver,lung,prostate,skin,uterus	Multi-cancer
CUL3	M299	prostate	Single-cancer
CYSLTR2	L129	eye	Single-cancer
DICER1	E1813	uterus	Single-cancer
DICER1	D1810	uterus	Single-cancer
DIS3	R780	blood	Single-cancer
DIS3	D479	lung	Single-cancer
DIS3	D488	blood,lung	Multi-cancer
DIS3	R689	bowel	Single-cancer
DNMT1	E432	bowel	Single-cancer
DNMT1	E51	uterus	Single-cancer
DNMT3A	R882	blood,lymph	Multi-cancer
DNMT3B	V229	lung	Single-cancer
EGFR	L838	kidney	Single-cancer
EGFR	L62	cnsbrain,lung	Multi-cancer
EGFR	H304	cnsbrain	Single-cancer
EGFR	G598	cnsbrain	Single-cancer
EGFR	L858	lung	Single-cancer
EGFR	A750	lung	Single-cancer
EGFR	R108	cnsbrain	Single-cancer
EGFR	L747	lung	Single-cancer
EGFR	R252	cnsbrain	Single-cancer
EGFR	T790	lung	Single-cancer
EGFR	R222	cnsbrain	Single-cancer
EGFR	T363	cnsbrain	Single-cancer
EGFR	P596	cnsbrain	Single-cancer
EGFR	T263	cnsbrain	Single-cancer
EGFR	E709	lung	Single-cancer
EGFR	A289	cnsbrain	Single-cancer
EGFR	L861	lung	Single-cancer
EGFR	K754	lung	Single-cancer
EGFR	S768	lung	Single-cancer
EGFR	L833	lung	Single-cancer
EGFR	G719	lung	Single-cancer
EIF1AX	G9	thyroid	Single-cancer
EP300	C1164	bladder	Single-cancer
EP300	Q1455	bladder	Single-cancer
EP300	W1466	bowel	Single-cancer
EP300	D1399	cervix,esophagusstomach,headandneck	Multi-cancer
EP300	Y1467	lymph	Single-cancer
EP300	L415	lymph	Single-cancer
EP300	Y1414	lung	Single-cancer
EPAS1	Y532	adrenalgland	Single-cancer
EPAS1	P531	adrenalgland	Single-cancer
EPHA7	G656	skin	Single-cancer
EPHB1	R743	skin	Single-cancer
ERBB2	V659	lung	Single-cancer
ERBB2	V777	bowel,breast,esophagusstomach	Multi-cancer
ERBB2	L869	breast	Single-cancer
ERBB2	V842	bowel,pancreas,uterus	Multi-cancer
ERBB2	R103	bladder	Single-cancer
ERBB2	D277	bladder	Single-cancer
ERBB2	D769	breast,esophagusstomach	Multi-cancer
ERBB2	R138	skin	Single-cancer
ERBB2	G776	esophagusstomach	Single-cancer
ERBB2	L755	bladder,bowel,breast,esophagusstomach,lung,uterus	Multi-cancer
ERBB2	S310	biliarytract,bladder,bowel,breast,cervix,esophagusstomach,lung,skin	Multi-cancer
ERBB2	G660	bladder	Single-cancer
ERBB2	R678	bladder,bowel,esophagusstomach,uterus	Multi-cancer
ERBB3	R103	bladder	Single-cancer
ERBB3	M91	bladder	Single-cancer
ERBB3	E928	breast	Single-cancer
ERBB3	S846	bowel,esophagusstomach	Multi-cancer
ERBB3	A232	bowel	Single-cancer
ERBB3	E332	bladder	Single-cancer
ERBB3	D297	bladder,esophagusstomach,uterus	Multi-cancer
ERBB3	H228	bladder	Single-cancer
ERBB3	K329	bladder,breast	Multi-cancer
ERBB3	V104	biliarytract,bladder,bowel,breast,cervix,esophagusstomach,uterus	Multi-cancer
ERBB4	K1223	esophagusstomach	Single-cancer
ERBB4	K1002	esophagusstomach	Single-cancer
ERBB4	L798	esophagusstomach	Single-cancer
ERBB4	F1102	esophagusstomach	Single-cancer
ERBB4	Q707	bladder	Single-cancer
ERBB4	S1289	bladder	Single-cancer
ERBB4	S774	esophagusstomach	Single-cancer
ERCC2	S246	bladder	Single-cancer
ERCC2	T484	bladder	Single-cancer
ERCC2	N238	bladder	Single-cancer
ERCC2	E606	bladder	Single-cancer
ERCC2	Y14	bladder	Single-cancer
ERCC2	Y24	bladder	Single-cancer
ERCC2	D609	bladder	Single-cancer
ERCC2	Y72	bladder	Single-cancer
ERCC2	P463	bladder	Single-cancer
ERRFI1	K409	bowel	Single-cancer
ESR1	Y537	breast,uterus	Multi-cancer
ESR1	L536	breast,uterus	Multi-cancer
ESR1	E380	breast	Single-cancer
ESR1	D538	breast	Single-cancer
ETV6	R369	bowel	Single-cancer
ETV6	S284	skin	Single-cancer
EZH2	K510	testis	Single-cancer
EZH2	K660	lymph	Single-cancer
EZH2	Y641	bone,lymph,skin	Multi-cancer
FBXW7	D520	bowel	Single-cancer
FBXW7	R479	bladder,bowel,cervix,esophagusstomach,headandneck,lung,uterus	Multi-cancer
FBXW7	R505	bladder,bowel,cervix,esophagusstomach,headandneck,lung,uterus	Multi-cancer
FBXW7	R689	bowel,uterus	Multi-cancer
FBXW7	R465	bladder,bowel,cervix,cnsbrain,esophagusstomach,lung,uterus	Multi-cancer
FBXW7	G423	uterus	Single-cancer
FBXW7	T532	bladder	Single-cancer
FBXW7	S582	bowel	Single-cancer
FBXW7	S546	bladder	Single-cancer
FBXW7	R658	bowel,uterus	Multi-cancer
FBXW7	R367	bowel	Single-cancer
FBXW7	Y545	esophagusstomach	Single-cancer
FGFR1	K656	cnsbrain	Single-cancer
FGFR1	N546	adrenalgland,cnsbrain,softtissue	Multi-cancer
FGFR2	C382	biliarytract,esophagusstomach,uterus	Multi-cancer
FGFR2	R203	bowel	Single-cancer
FGFR2	N549	bladder,breast,uterus	Multi-cancer
FGFR2	S252	uterus	Single-cancer
FGFR2	Y375	uterus	Single-cancer
FGFR2	F276	biliarytract	Single-cancer
FGFR3	K650	bladder	Single-cancer
FGFR3	R248	bladder	Single-cancer
FGFR3	Y373	bladder	Single-cancer
FGFR3	G370	bladder	Single-cancer
FGFR3	S371	bladder	Single-cancer
FGFR3	S249	bladder,headandneck,lung	Multi-cancer
FGFR3	G380	bladder,headandneck	Multi-cancer
FGFR4	V550	breast,softtissue	Multi-cancer
FGFR4	N535	breast	Single-cancer
FH	M336	liver	Single-cancer
FLT3	D835	blood	Single-cancer
FOXA1	R261	prostate	Single-cancer
FOXA1	I176	breast	Single-cancer
FOXA1	S242	breast	Single-cancer
FOXA1	M253	prostate	Single-cancer
FOXA1	H247	breast,prostate	Multi-cancer
FOXA1	S250	breast	Single-cancer
FOXA1	F266	prostate	Single-cancer
FOXA1	R219	prostate	Single-cancer
FOXA1	D226	breast,prostate	Multi-cancer
FOXL2	C134	ovaryfallopiantube	Single-cancer
FOXO1	S205	lymph	Single-cancer
FOXO1	S22	lymph	Single-cancer
FOXO1	T24	lymph	Single-cancer
FOXP1	R514	bladder	Single-cancer
FOXP1	S448	skin	Single-cancer
FUBP1	R430	uterus	Single-cancer
GATA2	C352	lung	Single-cancer
GATA3	R364	breast	Single-cancer
GATA3	R366	breast	Single-cancer
GATA3	M293	breast	Single-cancer
GLI1	R380	bowel	Single-cancer
GNA11	Q209	eye,skin	Multi-cancer
GNAQ	T96	kidney,lymph	Multi-cancer
GNAQ	G48	eye	Single-cancer
GNAQ	Q209	eye,skin	Multi-cancer
GNAQ	R183	eye	Single-cancer
GNAS	R201	biliarytract,bowel,cervix,esophagusstomach,liver,lung,pancreas	Multi-cancer
GNAS	Q227	lung	Single-cancer
GTF2I	F641	skin	Single-cancer
GTF2I	N440	bladder,esophagusstomach,softtissue	Multi-cancer
GTF2I	L424	thymus	Single-cancer
H3F3A	K28	cnsbrain	Single-cancer
H3F3A	G35	cnsbrain	Single-cancer
HGF	G229	cervix	Single-cancer
HIST1H1C	E115	breast	Single-cancer
HIST1H1C	A180	bladder,breast,lung	Multi-cancer
HIST1H3B	E106	lung	Single-cancer
HIST1H3B	K28	cnsbrain	Single-cancer
HIST1H3C	K37	headandneck	Single-cancer
HNF1A	R114	uterus	Single-cancer
HNF1A	S591	esophagusstomach	Single-cancer
HNF1A	I27	lymph	Single-cancer
HNF1A	G338	prostate	Single-cancer
HRAS	Q61	adrenalgland,bladder,headandneck,lung,prostate,skin,softtissue,thyroid	Multi-cancer
HRAS	K117	bladder,thymus	Multi-cancer
HRAS	G12	bladder,headandneck,skin	Multi-cancer
HRAS	G13	adrenalgland,bladder,headandneck,lung,skin,thymus	Multi-cancer
IDH1	R132	biliarytract,blood,bone,bowel,cnsbrain,liver,lung,prostate,skin	Multi-cancer
IDH2	R172	biliarytract,blood,cnsbrain,lymph	Multi-cancer
IDH2	R140	blood	Single-cancer
IGF1R	G129	breast	Single-cancer
IKZF1	E304	skin	Single-cancer
IL7R	R206	skin	Single-cancer
IL7R	I241	lung	Single-cancer
IL7R	K395	esophagusstomach	Single-cancer
INPPL1	A1185	adrenalgland	Single-cancer
INPPL1	R70	esophagusstomach	Single-cancer
IRF4	C99	lymph	Single-cancer
IRF4	Y428	skin	Single-cancer
IRF4	K123	blood	Single-cancer
IRS2	G1057	lymph	Single-cancer
JAK1	L910	liver	Single-cancer
JUN	E112	bladder	Single-cancer
KDM6A	Q1003	bladder	Single-cancer
KDM6A	G526	kidney	Single-cancer
KDR	C482	lymph	Single-cancer
KEAP1	G417	lung	Single-cancer
KEAP1	M110	lung	Single-cancer
KEAP1	G480	lung	Single-cancer
KEAP1	R601	lung	Single-cancer
KEAP1	R272	lung	Single-cancer
KEAP1	R470	lung	Single-cancer
KEAP1	R320	lung	Single-cancer
KEAP1	V155	lung	Single-cancer
KEAP1	G333	lung	Single-cancer
KIT	V560	softtissue	Single-cancer
KIT	Y823	softtissue,testis	Multi-cancer
KIT	L576	skin,softtissue	Multi-cancer
KIT	K642	skin,softtissue,testis	Multi-cancer
KIT	D820	softtissue,testis	Multi-cancer
KIT	V559	skin,softtissue	Multi-cancer
KIT	D816	blood,testis	Multi-cancer
KIT	W557	softtissue,testis	Multi-cancer
KIT	V654	softtissue	Single-cancer
KIT	N822	skin,softtissue,testis	Multi-cancer
KLF4	K443	pancreas	Single-cancer
KMT2D	L1375	kidney	Single-cancer
KNSTRN	V12	esophagusstomach	Single-cancer
KNSTRN	P28	skin	Single-cancer
KNSTRN	S24	skin	Single-cancer
KRAS	G13	biliarytract,bladder,blood,bowel,cervix,esophagusstomach,lung,lymph,pancreas,uterus	Multi-cancer
KRAS	G60	bowel	Single-cancer
KRAS	G12	ampullaofvater,biliarytract,bladder,blood,bowel,breast,cervix,cnsbrain,esophagusstomach,headandneck,kidney,lung,ovaryfallopiantube,pancreas,prostate,skin,softtissue,testis,thymus,thyroid,uterus	Multi-cancer
KRAS	Q61	biliarytract,bladder,blood,bowel,esophagusstomach,lung,pancreas,prostate,testis,thyroid,uterus	Multi-cancer
KRAS	A11	lung	Single-cancer
KRAS	Q22	bowel	Single-cancer
KRAS	A146	blood,bowel,esophagusstomach,lung,testis	Multi-cancer
KRAS	K117	blood,bowel	Multi-cancer
LYN	I364	bladder	Single-cancer
MAP2K1	G128	bowel	Single-cancer
MAP2K1	P124	skin	Single-cancer
MAP2K1	F53	bladder,bowel	Multi-cancer
MAP2K1	K57	bowel,lung,lymph	Multi-cancer
MAP2K1	E203	skin	Single-cancer
MAP2K4	S184	breast	Single-cancer
MAP3K1	L380	breast	Single-cancer
MAPK1	E322	bladder,cervix,headandneck	Multi-cancer
MAX	R60	bowel,cnsbrain	Multi-cancer
MAX	H28	uterus	Single-cancer
MAX	R36	blood	Single-cancer
MED12	V1223	prostate	Single-cancer
MED12	G44	bowel,uterus	Multi-cancer
MED12	L1224	prostate	Single-cancer
MEF2B	K4	lymph	Single-cancer
MET	Y1003	lung	Single-cancer
MET	D1010	lung	Single-cancer
MET	F1200	kidney	Single-cancer
MET	M1250	kidney	Single-cancer
MET	Y1230	kidney	Single-cancer
MET	V1070	kidney	Single-cancer
MET	H1094	kidney	Single-cancer
MTOR	L1460	kidney	Single-cancer
MTOR	L2427	kidney	Single-cancer
MTOR	S2215	bowel,kidney	Multi-cancer
MTOR	C1483	kidney	Single-cancer
MTOR	T1977	kidney	Single-cancer
MTOR	V2006	kidney	Single-cancer
MTOR	F1888	kidney	Single-cancer
MYC	V7	lymph	Single-cancer
MYC	S161	bowel	Single-cancer
MYC	P74	lung	Single-cancer
MYCN	P44	cnsbrain,pancreas,uterus	Multi-cancer
MYD88	S230	lymph	Single-cancer
MYD88	M219	blood	Single-cancer
MYD88	L252	blood,lymph	Multi-cancer
MYD88	P153	skin	Single-cancer
MYOD1	L122	softtissue	Single-cancer
NCOA3	R80	bladder	Single-cancer
NF1	R440	skin	Single-cancer
NF1	R2450	uterus	Single-cancer
NF1	R461	uterus	Single-cancer
NFE2L2	Q26	lung	Single-cancer
NFE2L2	L30	headandneck	Single-cancer
NFE2L2	G81	esophagusstomach,kidney,lung	Multi-cancer
NFE2L2	W24	lung	Single-cancer
NFE2L2	R34	bladder,headandneck,lung	Multi-cancer
NFE2L2	D29	headandneck,kidney,lung	Multi-cancer
NFE2L2	G31	esophagusstomach,lung	Multi-cancer
NFE2L2	T80	lung,uterus	Multi-cancer
NFE2L2	E79	esophagusstomach,headandneck,lung	Multi-cancer
NFE2L2	E82	liver,uterus	Multi-cancer
NOTCH1	E455	headandneck	Single-cancer
NOTCH1	F853	lung	Single-cancer
NOTCH1	C440	headandneck	Single-cancer
NOTCH2	T235	biliarytract,lymph	Multi-cancer
NRAS	G12	blood,bowel,headandneck,skin,testis,uterus	Multi-cancer
NRAS	G13	blood,bowel,skin	Multi-cancer
NRAS	G60	skin	Single-cancer
NRAS	Q61	biliarytract,bladder,blood,bowel,cnsbrain,esophagusstomach,headandneck,lung,ovaryfallopiantube,skin,softtissue,testis,thymus,thyroid,uterus	Multi-cancer
NSD1	C1710	headandneck	Single-cancer
NUP93	Q15	bladder,thyroid	Multi-cancer
NUP93	E14	breast	Single-cancer
PAK7	M173	skin	Single-cancer
PAX5	V26	bowel,esophagusstomach	Multi-cancer
PBRM1	R1185	kidney	Single-cancer
PDGFRA	C235	cnsbrain	Single-cancer
PDGFRA	D842	cnsbrain,softtissue	Multi-cancer
PDGFRA	N659	cnsbrain,softtissue	Multi-cancer
PDGFRA	E229	cnsbrain	Single-cancer
PDPK1	P499	skin	Single-cancer
PGR	R836	skin	Single-cancer
PIK3CA	G1049	bowel,breast,uterus	Multi-cancer
PIK3CA	E726	bladder,bowel,breast,lung	Multi-cancer
PIK3CA	E545	biliarytract,bladder,bowel,breast,cervix,cnsbrain,esophagusstomach,headandneck,kidney,lung,ovaryfallopiantube,pancreas,penis,prostate,skin,testis,thyroid,uterus	Multi-cancer
PIK3CA	G106	bladder,uterus	Multi-cancer
PIK3CA	N1044	breast	Single-cancer
PIK3CA	R38	bowel,uterus	Multi-cancer
PIK3CA	M1	cnsbrain	Single-cancer
PIK3CA	E453	bladder,breast,cnsbrain	Multi-cancer
PIK3CA	R93	esophagusstomach,uterus	Multi-cancer
PIK3CA	C901	uterus	Single-cancer
PIK3CA	T1025	uterus	Single-cancer
PIK3CA	K111	bowel,breast,cnsbrain,esophagusstomach,uterus	Multi-cancer
PIK3CA	G118	breast,cnsbrain,uterus	Multi-cancer
PIK3CA	R88	bowel,breast,cnsbrain,esophagusstomach,uterus	Multi-cancer
PIK3CA	E81	breast	Single-cancer
PIK3CA	N345	bowel,breast,cnsbrain,esophagusstomach,headandneck,lung,prostate,softtissue,uterus	Multi-cancer
PIK3CA	R357	bowel	Single-cancer
PIK3CA	E542	biliarytract,bladder,bowel,breast,cervix,cnsbrain,esophagusstomach,headandneck,kidney,lung,prostate,softtissue,testis,uterus	Multi-cancer
PIK3CA	Y1021	bowel,uterus	Multi-cancer
PIK3CA	M1043	bowel,breast,cnsbrain,headandneck,thyroid,uterus	Multi-cancer
PIK3CA	C420	bowel,breast,cnsbrain,headandneck,lung,uterus	Multi-cancer
PIK3CA	Q546	bladder,bowel,breast,cnsbrain,esophagusstomach,headandneck,prostate,softtissue,uterus	Multi-cancer
PIK3CA	E39	uterus	Single-cancer
PIK3CA	H1047	biliarytract,bladder,bowel,breast,cervix,cnsbrain,esophagusstomach,headandneck,kidney,liver,lung,ovaryfallopiantube,pancreas,prostate,skin,softtissue,thyroid,uterus	Multi-cancer
PIK3CA	P104	breast	Single-cancer
PIK3CA	V344	bowel,uterus	Multi-cancer
PIK3CA	R108	bowel,uterus	Multi-cancer
PIK3CB	R321	bowel	Single-cancer
PIK3CB	D1067	kidney,skin	Multi-cancer
PIK3CD	E1021	lymph	Single-cancer
PIK3CD	C416	testis	Single-cancer
PIK3CD	R894	esophagusstomach	Single-cancer
PIK3R1	N564	bowel,cnsbrain	Multi-cancer
PIK3R1	K379	cnsbrain	Single-cancer
PIK3R1	D560	cnsbrain	Single-cancer
PIK3R1	G376	cnsbrain	Single-cancer
PIK3R1	K567	bowel,uterus	Multi-cancer
PIK3R2	G373	uterus	Single-cancer
PIM1	K24	lymph	Single-cancer
PIM1	S97	lymph	Single-cancer
PIM1	E79	lymph	Single-cancer
PIM1	Q37	lymph	Single-cancer
PIM1	L2	lymph	Single-cancer
PIM1	G28	lymph	Single-cancer
PLK2	L208	esophagusstomach	Single-cancer
PMS2	K651	testis	Single-cancer
POLE	P286	bowel,uterus	Multi-cancer
POLE	V411	bowel,uterus	Multi-cancer
PPP2R1A	P179	uterus	Single-cancer
PPP2R1A	S256	uterus	Single-cancer
PPP2R1A	R183	bowel,breast,headandneck,ovaryfallopiantube,prostate,uterus	Multi-cancer
PPP4R2	*1	skin	Single-cancer
PPP6C	R264	skin	Single-cancer
PPP6C	S270	skin	Single-cancer
PRDM14	F204	skin	Single-cancer
PRDM14	R505	bowel	Single-cancer
PREX2	L50	esophagusstomach	Single-cancer
PRKCI	R480	bowel	Single-cancer
PTEN	R233	bowel,uterus	Multi-cancer
PTEN	G129	uterus	Single-cancer
PTEN	C136	uterus	Single-cancer
PTEN	Y68	bowel	Single-cancer
PTEN	C71	cnsbrain	Single-cancer
PTEN	A126	breast	Single-cancer
PTEN	C105	skin	Single-cancer
PTEN	C124	breast	Single-cancer
PTEN	R130	bowel,breast,cervix,cnsbrain,headandneck,lung,prostate,skin,uterus	Multi-cancer
PTEN	R173	bowel	Single-cancer
PTEN	G127	uterus	Single-cancer
PTEN	G132	cnsbrain	Single-cancer
PTEN	Y155	uterus	Single-cancer
PTEN	P38	skin	Single-cancer
PTEN	D92	uterus	Single-cancer
PTPN11	E76	cnsbrain	Single-cancer
PTPN11	F285	cnsbrain	Single-cancer
PTPN11	E69	cnsbrain	Single-cancer
PTPN11	A465	cnsbrain	Single-cancer
PTPN11	Q514	blood,cnsbrain	Multi-cancer
PTPN11	D61	cnsbrain	Single-cancer
PTPN11	N308	cnsbrain	Single-cancer
PTPN11	A72	blood,cnsbrain	Multi-cancer
PTPN11	T511	cnsbrain	Single-cancer
PTPN11	G507	esophagusstomach	Single-cancer
PTPRD	S431	uterus	Single-cancer
PTPRT	L668	esophagusstomach	Single-cancer
PTPRT	E548	skin	Single-cancer
PTPRT	L695	skin	Single-cancer
RAC1	P29	skin	Single-cancer
RAC1	G12	testis	Single-cancer
RAC1	A159	headandneck	Single-cancer
RAC1	P34	testis	Single-cancer
RAC1	K116	headandneck	Single-cancer
RAD50	D69	lung	Single-cancer
RAD51C	P21	breast	Single-cancer
RAD51C	Y224	bladder	Single-cancer
RAD52	R396	skin	Single-cancer
RAF1	S257	bowel,lung	Multi-cancer
RET	M918	adrenalgland,thyroid	Multi-cancer
RHEB	Y35	kidney,testis,uterus	Multi-cancer
RHOA	L22	esophagusstomach	Single-cancer
RHOA	R5	esophagusstomach,lymph	Multi-cancer
RHOA	Y34	esophagusstomach	Single-cancer
RHOA	G62	esophagusstomach	Single-cancer
RHOA	A161	bladder	Single-cancer
RHOA	L57	esophagusstomach	Single-cancer
RHOA	E40	headandneck	Single-cancer
RHOA	E47	bladder	Single-cancer
RHOA	T37	bowel	Single-cancer
RHOA	Y42	esophagusstomach	Single-cancer
RHOA	G17	breast,lymph	Multi-cancer
RNF43	H86	esophagusstomach	Single-cancer
RRAS2	Q72	lung,uterus	Multi-cancer
RUNX1	R135	blood	Single-cancer
RUNX1	R174	blood	Single-cancer
RXRA	S427	bladder	Single-cancer
SDHA	L639	lymph	Single-cancer
SDHA	V644	lymph	Single-cancer
SDHA	S445	lymph	Single-cancer
SESN2	I425	bladder	Single-cancer
SF3B1	G740	lung	Single-cancer
SF3B1	D894	blood	Single-cancer
SF3B1	G742	blood	Single-cancer
SF3B1	K700	biliarytract,blood,breast,pancreas	Multi-cancer
SF3B1	R625	bowel,eye,headandneck,skin,vulvavagina	Multi-cancer
SF3B1	K741	liver	Single-cancer
SF3B1	K666	blood,eye	Multi-cancer
SF3B1	N626	blood	Single-cancer
SF3B1	E902	bladder	Single-cancer
SMAD2	C463	bowel	Single-cancer
SMAD2	P305	bowel	Single-cancer
SMAD2	R321	bowel	Single-cancer
SMAD2	T303	bowel	Single-cancer
SMAD3	R268	bowel	Single-cancer
SMAD4	E330	bowel	Single-cancer
SMAD4	R361	biliarytract,bowel,breast,esophagusstomach,lung,pancreas	Multi-cancer
SMAD4	G419	bowel	Single-cancer
SMAD4	D537	bowel,pancreas	Multi-cancer
SMAD4	G386	bowel,esophagusstomach,pancreas	Multi-cancer
SMAD4	D351	bowel,esophagusstomach,lung	Multi-cancer
SMAD4	P356	bowel,esophagusstomach	Multi-cancer
SMARCA4	R973	lymph	Single-cancer
SMARCA4	M781	cnsbrain,esophagusstomach	Multi-cancer
SMARCA4	R1192	cnsbrain	Single-cancer
SMARCA4	T910	cnsbrain,esophagusstomach,pancreas	Multi-cancer
SMARCA4	G1232	lung	Single-cancer
SMARCB1	R377	esophagusstomach	Single-cancer
SMO	W535	cnsbrain	Single-cancer
SMO	L412	cnsbrain	Single-cancer
SMO	V414	cervix	Single-cancer
SOCS1	A3	lymph	Single-cancer
SOS1	N233	lung,uterus	Multi-cancer
SOX17	S403	uterus	Single-cancer
SOX17	A96	uterus	Single-cancer
SPOP	Y87	prostate	Single-cancer
SPOP	M117	uterus	Single-cancer
SPOP	F125	prostate	Single-cancer
SPOP	F133	prostate	Single-cancer
SPOP	K129	prostate	Single-cancer
SPOP	W131	prostate	Single-cancer
SPOP	F102	prostate	Single-cancer
SPRED1	R349	bladder	Single-cancer
SRSF2	P95	blood	Single-cancer
STAG2	R216	bladder	Single-cancer
STAT3	H410	liver	Single-cancer
STAT3	S614	lymph	Single-cancer
STAT3	D661	headandneck	Single-cancer
STK11	E223	lung	Single-cancer
STK11	S216	lung	Single-cancer
STK11	H174	kidney	Single-cancer
STK11	E165	lung	Single-cancer
STK11	D194	lung	Single-cancer
STK11	Q220	lung	Single-cancer
STK11	W239	lung	Single-cancer
STK11	W308	lung	Single-cancer
STK11	G251	lung	Single-cancer
STK11	G242	lung	Single-cancer
STK11	N181	lung	Single-cancer
STK19	D89	skin	Single-cancer
SUZ12	R101	prostate	Single-cancer
TBX3	W113	breast	Single-cancer
TCEB1	Y79	kidney	Single-cancer
TCF3	N551	lymph	Single-cancer
TCF7L2	R471	bowel	Single-cancer
TET1	P1752	skin	Single-cancer
TGFBR1	I259	cervix	Single-cancer
TGFBR1	S241	bowel	Single-cancer
TGFBR1	T375	bowel	Single-cancer
TGFBR2	R528	bowel	Single-cancer
TGFBR2	E519	headandneck	Single-cancer
TNFRSF14	M1	lymph	Single-cancer
TNFRSF14	C111	bladder	Single-cancer
TP53	G244	cnsbrain,esophagusstomach,lung,ovaryfallopiantube	Multi-cancer
TP53	G266	bowel,breast,cnsbrain,esophagusstomach,headandneck,lung,ovaryfallopiantube,pancreas,uterus	Multi-cancer
TP53	L194	breast,lung,pancreas	Multi-cancer
TP53	R337	breast,lung	Multi-cancer
TP53	H214	bladder,esophagusstomach,lung,pancreas	Multi-cancer
TP53	C277	lung	Single-cancer
TP53	V173	bowel,breast,cnsbrain,esophagusstomach,headandneck,lung,pancreas,uterus	Multi-cancer
TP53	R110	lung	Single-cancer
TP53	S241	bladder,bowel,breast,esophagusstomach,lung,ovaryfallopiantube,pancreas,uterus	Multi-cancer
TP53	E286	bowel,breast,esophagusstomach,lung,skin	Multi-cancer
TP53	R213	bladder,bowel,breast,cnsbrain,esophagusstomach,headandneck,kidney,lung,ovaryfallopiantube,pancreas,prostate,skin,softtissue,uterus	Multi-cancer
TP53	R196	bowel,breast,cnsbrain,esophagusstomach,headandneck,lung,ovaryfallopiantube,pancreas,skin	Multi-cancer
TP53	M246	cnsbrain,lung	Multi-cancer
TP53	E271	bladder	Single-cancer
TP53	H178	uterus	Single-cancer
TP53	P278	bladder,bowel,breast,esophagusstomach,headandneck,lung,ovaryfallopiantube,skin	Multi-cancer
TP53	K164	lung	Single-cancer
TP53	V216	breast,cnsbrain	Multi-cancer
TP53	H193	bladder,breast,cnsbrain,esophagusstomach,headandneck,liver,lung,ovaryfallopiantube,pancreas,uterus	Multi-cancer
TP53	V274	bowel,breast,lung,pancreas	Multi-cancer
TP53	R280	bladder,breast,headandneck,lung	Multi-cancer
TP53	P190	bowel	Single-cancer
TP53	A159	bladder,lung	Multi-cancer
TP53	N131	lung	Single-cancer
TP53	H168	bowel	Single-cancer
TP53	R248	bladder,bowel,breast,cnsbrain,esophagusstomach,headandneck,lung,lymph,ovaryfallopiantube,pancreas,prostate,skin,softtissue,uterus	Multi-cancer
TP53	R273	bladder,blood,bowel,breast,cnsbrain,esophagusstomach,headandneck,kidney,lung,ovaryfallopiantube,pancreas,prostate,uterus	Multi-cancer
TP53	M237	bowel,cnsbrain,esophagusstomach,headandneck,lung,ovaryfallopiantube,uterus	Multi-cancer
TP53	P151	bladder,bowel,breast,esophagusstomach,headandneck,ovaryfallopiantube,pancreas,skin	Multi-cancer
TP53	Y220	bladder,bowel,breast,cnsbrain,esophagusstomach,headandneck,liver,lung,ovaryfallopiantube,pancreas,prostate,softtissue,uterus	Multi-cancer
TP53	L257	bowel	Single-cancer
TP53	E285	bladder,esophagusstomach,lung	Multi-cancer
TP53	F109	skin	Single-cancer
TP53	S127	bowel	Single-cancer
TP53	Q136	breast,cnsbrain,headandneck	Multi-cancer
TP53	I195	blood,bowel,breast,cnsbrain,esophagusstomach,headandneck,lung,ovaryfallopiantube,pancreas	Multi-cancer
TP53	G245	bladder,bowel,breast,cnsbrain,esophagusstomach,headandneck,lung,ovaryfallopiantube,pancreas,prostate,uterus	Multi-cancer
TP53	V272	bowel,breast,esophagusstomach,headandneck,lung,ovaryfallopiantube,pancreas	Multi-cancer
TP53	R267	lung	Single-cancer
TP53	R282	bladder,bowel,cnsbrain,esophagusstomach,headandneck,lung,ovaryfallopiantube,pancreas,prostate,skin	Multi-cancer
TP53	D208	breast	Single-cancer
TP53	N239	breast,headandneck,lung,uterus	Multi-cancer
TP53	A161	bladder	Single-cancer
TP53	V157	breast,headandneck,lung,ovaryfallopiantube	Multi-cancer
TP53	R175	bladder,bowel,breast,cnsbrain,esophagusstomach,headandneck,lung,ovaryfallopiantube,pancreas,prostate,softtissue,uterus	Multi-cancer
TP53	Q331	lung	Single-cancer
TP53	I255	breast	Single-cancer
TP53	Y107	breast	Single-cancer
TP53	T125	bowel	Single-cancer
TP53	F134	esophagusstomach,lung,skin	Multi-cancer
TP53	N247	skin	Single-cancer
TP53	F270	breast,lung	Multi-cancer
TP53	P152	bowel	Single-cancer
TP53	S215	bowel,esophagusstomach,lung,pancreas,prostate	Multi-cancer
TP53	R306	bowel,breast,esophagusstomach,headandneck	Multi-cancer
TP53	H179	bowel,breast,cnsbrain,esophagusstomach,headandneck,lung,ovaryfallopiantube,pancreas,prostate,uterus	Multi-cancer
TP53	Y163	bowel,breast,cnsbrain,esophagusstomach,headandneck,liver,lung,ovaryfallopiantube	Multi-cancer
TP53	I232	bowel	Single-cancer
TP53	E258	bladder,bowel,lung,pancreas	Multi-cancer
TP53	G154	lung	Single-cancer
TP53	F113	breast	Single-cancer
TP53	Q144	lung	Single-cancer
TP53	R342	bowel,breast,esophagusstomach,headandneck,lung,ovaryfallopiantube,pancreas,skin	Multi-cancer
TP53	D281	cnsbrain,lung	Multi-cancer
TP53	G105	lung	Single-cancer
TP53	K132	bowel,breast,cnsbrain,lung,ovaryfallopiantube,pancreas	Multi-cancer
TP53	R249	breast,cnsbrain,esophagusstomach,headandneck,liver,lung	Multi-cancer
TP53	K120	cnsbrain	Single-cancer
TP53	E298	headandneck,lung	Multi-cancer
TP53	V143	skin	Single-cancer
TP53	Y234	bladder,breast,cnsbrain,esophagusstomach,lung,ovaryfallopiantube,pancreas,softtissue	Multi-cancer
TP53	Y126	bowel,breast,headandneck,pancreas	Multi-cancer
TP53	C242	bowel,breast,headandneck,lung,uterus	Multi-cancer
TP53	C275	bowel,cnsbrain,esophagusstomach,headandneck,lung,ovaryfallopiantube,skin	Multi-cancer
TP53	Y236	bowel,breast,cnsbrain,headandneck,lung,pancreas,skin	Multi-cancer
TP53	R158	cnsbrain,lung	Multi-cancer
TP53	L130	cnsbrain	Single-cancer
TP53	M133	breast	Single-cancer
TP53	C238	bladder,bowel,breast,cnsbrain,esophagusstomach,headandneck,lung,ovaryfallopiantube,pancreas,uterus	Multi-cancer
TP53	G262	uterus	Single-cancer
TP53	V172	lung	Single-cancer
TP53	C141	bowel,breast	Multi-cancer
TP53	T155	cnsbrain,lung	Multi-cancer
TP53	R181	skin	Single-cancer
TP53	C176	bowel,breast,esophagusstomach,headandneck,lung,lymph,ovaryfallopiantube,pancreas,prostate	Multi-cancer
TP53	Y205	bowel,breast,cnsbrain,esophagusstomach,lung,pancreas	Multi-cancer
TP53	C135	bowel,breast,esophagusstomach,kidney,lung	Multi-cancer
TP63	R379	skin	Single-cancer
TP63	E609	skin	Single-cancer
TRAF7	R189	lung	Single-cancer
TRAF7	N520	peritoneum	Single-cancer
U2AF1	S34	bladder,blood,lung,pancreas,uterus	Multi-cancer
U2AF1	Q157	blood	Single-cancer
VHL	S111	kidney	Single-cancer
VHL	S68	kidney	Single-cancer
VHL	W88	kidney	Single-cancer
VHL	L158	kidney	Single-cancer
VHL	C162	kidney	Single-cancer
VHL	S65	kidney	Single-cancer
VHL	S80	kidney	Single-cancer
VHL	L89	kidney	Single-cancer
VHL	N78	kidney	Single-cancer
VHL	G114	kidney	Single-cancer
VHL	L169	kidney	Single-cancer
VHL	D121	kidney	Single-cancer
VHL	I151	kidney	Single-cancer
VHL	R161	kidney	Single-cancer
VHL	P86	kidney	Single-cancer
VHL	V74	kidney	Single-cancer
VHL	L135	kidney	Single-cancer
VHL	H115	kidney	Single-cancer
WHSC1	T1150	lymph	Single-cancer
XPO1	E571	blood,breast,lymph	Multi-cancer

## Sheet: Hotspot-affected_interactions
Interaction	Cancer_types	Category
A8K147_FGFR2	uterus	Single-cancer
AARSD1_ERBB2	biliarytract,bladder,bowel,breast,cervix,esophagusstomach,lung,skin	Multi-cancer
AARSD1_ERCC2	bladder	Single-cancer
AARSD1_VHL	kidney	Single-cancer
ABL1_KIT	skin,softtissue	Multi-cancer
ABL2_EGFR	lung	Single-cancer
ABL2_ERBB3	breast	Single-cancer
ABL2_KIT	skin,softtissue	Multi-cancer
ABL2_PIK3R1	cnsbrain	Single-cancer
ABTB1_SMAD2	bowel	Single-cancer
ACSM5_EP300	lymph	Single-cancer
ACTB_EP300	lymph	Single-cancer
ACTN4_EGFR	cnsbrain,lung	Multi-cancer
ACVR1_ACVR1	cnsbrain,uterus	Multi-cancer
ACVR1_AJUBA	uterus	Single-cancer
ACVR1_AP2B1	uterus	Single-cancer
ACVR1_ARL13B	uterus	Single-cancer
ACVR1_BMPR2	uterus	Single-cancer
ACVR1_CDK14	uterus	Single-cancer
ACVR1_CHN1	uterus	Single-cancer
ACVR1_DCAF6	uterus	Single-cancer
ACVR1_FANCL	uterus	Single-cancer
ACVR1_FBXO30	uterus	Single-cancer
ACVR1_FCHO1	uterus	Single-cancer
ACVR1_FGD6	uterus	Single-cancer
ACVR1_FKBP1A	uterus	Single-cancer
ACVR1_FKBP1B	uterus	Single-cancer
ACVR1_FKBP4	uterus	Single-cancer
ACVR1_HEL112	uterus	Single-cancer
ACVR1_IKBKB	uterus	Single-cancer
ACVR1_ILKAP	uterus	Single-cancer
ACVR1_NAA20	uterus	Single-cancer
ACVR1_NEK8	uterus	Single-cancer
ACVR1_NRAS	biliarytract,bladder,blood,bowel,cnsbrain,esophagusstomach,headandneck,lung,ovaryfallopiantube,skin,softtissue,testis,thymus,thyroid,uterus	Multi-cancer
ACVR1_NUAK2	uterus	Single-cancer
ACVR1_PAK1	uterus	Single-cancer
ACVR1_PLEK	uterus	Single-cancer
ACVR1_PLEKHB1	cnsbrain,uterus	Multi-cancer
ACVR1_PLEKHJ1	uterus	Single-cancer
ACVR1_RAB17	uterus	Single-cancer
ACVR1_RAB25	uterus	Single-cancer
ACVR1_RAB3B	cnsbrain	Single-cancer
ACVR1_RAB6B	uterus	Single-cancer
ACVR1_RAP2A	uterus	Single-cancer
ACVR1_RASL12	uterus	Single-cancer
ACVR1_RHOBTB1	uterus	Single-cancer
ACVR1_RHOD	uterus	Single-cancer
ACVR1_RRAS2	uterus	Single-cancer
ACVR1_SOCS6	uterus	Single-cancer
ACVR1_SQSTM1	uterus	Single-cancer
ACVR1_STAT1	uterus	Single-cancer
ACVR1_STX8	uterus	Single-cancer
ACVR1_TGFBR1	cnsbrain	Single-cancer
ACVR1_TTC17	uterus	Single-cancer
ACVR1_TTC27	uterus	Single-cancer
ACVR1_UBE2E3	uterus	Single-cancer
ACVR1_UBXN1	uterus	Single-cancer
ACVR1_UHMK1	uterus	Single-cancer
ACVR1_USP21	uterus	Single-cancer
ACVR1_USP39	uterus	Single-cancer
ACVR1_VEPH1	uterus	Single-cancer
ACVR1_WDR61	uterus	Single-cancer
ACVR1B_RXRA	bladder	Single-cancer
ADH6_KRAS	biliarytract,bladder,blood,bowel,esophagusstomach,lung,pancreas,prostate,testis,thyroid,uterus	Multi-cancer
AES_BCL6	bowel	Single-cancer
AHR_EP300	lymph	Single-cancer
AIMP2_PPP2R1A	bowel,breast,headandneck,ovaryfallopiantube,prostate,uterus	Multi-cancer
AKAP13_RHOA	bowel,esophagusstomach,headandneck,lymph	Multi-cancer
AKT1_CTNNB1	bowel,liver	Multi-cancer
AKT1_EGFR	cnsbrain,lung	Multi-cancer
AKT1_FOXO1	lymph	Single-cancer
ANAPC2_SMAD2	bowel	Single-cancer
ANG_PTEN	uterus	Single-cancer
ANGPTL4_CDKN2A	headandneck,skin	Multi-cancer
ANGPTL4_ESR1	breast,uterus	Multi-cancer
ANGPTL4_FBXW7	bladder,bowel,cervix,esophagusstomach,headandneck,lung,uterus	Multi-cancer
ANK3_SMAD2	bowel	Single-cancer
ANK3_SMAD3	bowel	Single-cancer
ANKRD28_PPP6C	skin	Single-cancer
ANLN_RHOA	bowel,esophagusstomach,headandneck	Multi-cancer
ANTXR2_SMAD2	bowel	Single-cancer
ANXA1_EGFR	cnsbrain,lung	Multi-cancer
ANXA3_TP53	bladder,bowel,breast,cnsbrain,esophagusstomach,headandneck,lung,lymph,ovaryfallopiantube,pancreas,prostate,skin,softtissue,uterus	Multi-cancer
ANXA6_ERBB2	biliarytract,bladder,bowel,breast,cervix,esophagusstomach,lung,skin	Multi-cancer
ANXA7_TP53	bladder,blood,bowel,breast,cnsbrain,esophagusstomach,headandneck,kidney,lung,lymph,ovaryfallopiantube,pancreas,prostate,skin,softtissue,uterus	Multi-cancer
AP1B1_SMAD2	bowel	Single-cancer
AP2B1_SMAD4	bowel,esophagusstomach,pancreas	Multi-cancer
AP4S1_GTF2I	thymus	Single-cancer
APBA3_EGFR	cnsbrain,lung	Multi-cancer
APBB1_EGFR	cnsbrain,lung	Multi-cancer
APBB1_ERBB2	biliarytract,bladder,bowel,breast,cervix,esophagusstomach,lung,skin	Multi-cancer
APBB2_EGFR	cnsbrain,lung	Multi-cancer
APBB2_SMAD4	bowel,esophagusstomach,pancreas	Multi-cancer
APBB3_EGFR	cnsbrain,lung	Multi-cancer
APBB3_ERBB2	biliarytract,bladder,bowel,breast,cervix,esophagusstomach,lung,skin	Multi-cancer
APC_CTNNB1	bowel,liver	Multi-cancer
APEX1_EP300	lymph	Single-cancer
APEX1_TP53	bladder,bowel,breast,cnsbrain,esophagusstomach,headandneck,lung,lymph,ovaryfallopiantube,pancreas,prostate,skin,softtissue,uterus	Multi-cancer
APOA1_KRAS	biliarytract,bladder,blood,bowel,esophagusstomach,lung,pancreas,prostate,testis,thyroid,uterus	Multi-cancer
APOB_SMAD3	bowel	Single-cancer
APOE_RHEB	kidney,testis,uterus	Multi-cancer
APOH_TP53	bladder,bowel,breast,cnsbrain,esophagusstomach,headandneck,lung,lymph,ovaryfallopiantube,pancreas,prostate,skin,softtissue,uterus	Multi-cancer
APP_EGFR	cnsbrain,lung	Multi-cancer
APPL1_EGFR	cnsbrain,lung	Multi-cancer
APPL1_TP53	bladder,bowel,breast,cnsbrain,esophagusstomach,headandneck,lung,lymph,ovaryfallopiantube,pancreas,prostate,skin,softtissue,uterus	Multi-cancer
AR_CTNNB1	liver	Single-cancer
AR_NCOR1	prostate	Single-cancer
AR_NCOR2	prostate	Single-cancer
ARAP1_FGFR3	bladder	Single-cancer
ARFGAP3_SMAD2	bowel	Single-cancer
ARFIP2_RAC1	testis	Single-cancer
ARFIP2_STAT3	liver	Single-cancer
ARHGAP1_RHOA	bowel,esophagusstomach	Multi-cancer
ARHGAP20_RHOA	esophagusstomach	Single-cancer
ARHGAP31_RAC1	testis	Single-cancer
ARHGAP33_RAC1	testis	Single-cancer
ARHGDIA_RAC1	testis	Single-cancer
ARHGDIA_RHOA	bowel,esophagusstomach,headandneck	Multi-cancer
ARHGDIB_RAC1	testis	Single-cancer
ARHGEF1_SMAD2	bowel	Single-cancer
ARHGEF11_RHOA	bowel,esophagusstomach,headandneck,lymph	Multi-cancer
ARHGEF11_SMAD4	bowel,esophagusstomach,pancreas	Multi-cancer
ARHGEF12_RHOA	bowel,esophagusstomach,headandneck	Multi-cancer
ARHGEF15_ESR1	breast,uterus	Multi-cancer
ARHGEF4_RAC1	testis	Single-cancer
ARHGEF6_SMAD2	bowel	Single-cancer
ARHGEF6_SMAD3	bowel	Single-cancer
ARHGEF7_EGFR	cnsbrain,lung	Multi-cancer
ARHGEF7_SMAD2	bowel	Single-cancer
ARHGEF7_SMAD3	bowel	Single-cancer
ARHGEF7_SMAD4	bowel,esophagusstomach,pancreas	Multi-cancer
ARHGEF9_BCL6	bowel	Single-cancer
ARIH2_TP53	bladder,blood,bowel,breast,cnsbrain,esophagusstomach,headandneck,kidney,lung,lymph,ovaryfallopiantube,pancreas,prostate,skin,softtissue,uterus	Multi-cancer
ARL2BP_RAC1	testis	Single-cancer
ARL3_TP53	bladder,bowel,breast,cnsbrain,esophagusstomach,headandneck,lung,lymph,ovaryfallopiantube,pancreas,prostate,skin,softtissue,uterus	Multi-cancer
ARL4D_SMAD2	bowel	Single-cancer
ARL6IP1_FBXW7	bowel	Single-cancer
ARL8B_TGFBR1	bowel	Single-cancer
ARRB1_EGFR	cnsbrain,lung	Multi-cancer
ARRB2_EGFR	cnsbrain,lung	Multi-cancer
ARRB2_SMO	cervix	Single-cancer
ARSF_EP300	lymph	Single-cancer
ASF1A_HIST1H3A	lung	Single-cancer
ASF1B_HIST1H3A	lung	Single-cancer
ASH1L_HIST1H3A	lung	Single-cancer
ATAD2_ESR1	breast,uterus	Multi-cancer
ATF2_EP300	lymph	Single-cancer
ATF3_FGFR3	bladder	Single-cancer
ATF3_TP53	bladder,breast,cnsbrain,headandneck,lung	Multi-cancer
ATF4_NFE2L2	esophagusstomach,headandneck,lung	Multi-cancer
ATF5_EP300	lymph	Single-cancer
ATF7IP_SMAD4	bowel,esophagusstomach,pancreas	Multi-cancer
ATG5_KEAP1	lung	Single-cancer
ATM_TP53	bladder,bowel,breast,cnsbrain,esophagusstomach,headandneck,lung,lymph,ovaryfallopiantube,pancreas,prostate,skin,softtissue,uterus	Multi-cancer
ATP1A1_EZH2	lymph	Single-cancer
ATP1B1_EZH2	lymph	Single-cancer
ATP5C1_EGFR	cnsbrain,lung	Multi-cancer
ATP6AP1_ERBB2	biliarytract,bladder,bowel,breast,cervix,esophagusstomach,lung,skin	Multi-cancer
ATR_TP53	bladder,bowel,breast,cnsbrain,esophagusstomach,headandneck,lung,lymph,ovaryfallopiantube,pancreas,prostate,skin,softtissue,uterus	Multi-cancer
ATRX_EZH2	lymph	Single-cancer
AURKA_VHL	kidney	Single-cancer
AXIN1_CTNNB1	liver	Single-cancer
AXIN2_CTNNB1	liver	Single-cancer
B3KNU0_RAC1	testis	Single-cancer
B4DT73_TP53	bladder,blood,bowel,breast,cnsbrain,esophagusstomach,headandneck,kidney,lung,lymph,ovaryfallopiantube,pancreas,prostate,skin,softtissue,uterus	Multi-cancer
B4DYC6_ERBB2	biliarytract,bladder,bowel,breast,cervix,esophagusstomach,lung,skin	Multi-cancer
B4DYC6_ERCC2	bladder	Single-cancer
B4DYC6_KEAP1	lung	Single-cancer
B7Z2P9_BRAF	biliarytract,bladder,blood,bowel,cnsbrain,lung,lymph,ovaryfallopiantube,pancreas,prostate,skin,thyroid	Multi-cancer
BAD_KEAP1	lung	Single-cancer
BAG1_TP53	bladder,bowel,breast,cnsbrain,esophagusstomach,headandneck,lung,lymph,ovaryfallopiantube,pancreas,prostate,skin,softtissue,uterus	Multi-cancer
BAG2_TP53	bladder,blood,bowel,breast,cnsbrain,esophagusstomach,headandneck,kidney,lung,lymph,ovaryfallopiantube,pancreas,prostate,skin,softtissue,uterus	Multi-cancer
BAG6_RAC1	testis	Single-cancer
BAI1_ERBB2	biliarytract,bladder,bowel,breast,cervix,esophagusstomach,lung,skin	Multi-cancer
BAIAP2_EGFR	cnsbrain,lung	Multi-cancer
BAIAP2_RAC1	skin	Single-cancer
BAIAP3_ERBB2	biliarytract,bladder,bowel,breast,cervix,esophagusstomach,lung,skin	Multi-cancer
BAK1_BCL2	lymph	Single-cancer
BANP_MAX	blood,bowel,cnsbrain,uterus	Multi-cancer
BAP1_ESR1	breast,uterus	Multi-cancer
BATF3_PGR	skin	Single-cancer
BATF3_STAT3	liver	Single-cancer
BAZ1A_SMAD2	bowel	Single-cancer
BCAR3_ERBB2	biliarytract,bladder,bowel,breast,cervix,esophagusstomach,lung,skin	Multi-cancer
BCAR3_ERBB3	bladder,breast	Multi-cancer
BCAR3_MET	kidney	Single-cancer
BCAS2_EP300	lymph	Single-cancer
BCAS3_FBXW7	bowel	Single-cancer
BCAS3_KRAS	biliarytract,bladder,blood,bowel,esophagusstomach,lung,pancreas,prostate,testis,thyroid,uterus	Multi-cancer
BCAS3_SMAD4	bowel,esophagusstomach,pancreas	Multi-cancer
BCKDK_STAT3	liver	Single-cancer
BCL10_CARD11	lymph	Single-cancer
BCL2_BCL2	lymph	Single-cancer
BCL2_BCLAF1	lymph	Single-cancer
BCL2_BIK	lymph	Single-cancer
BCL2_HRK	lymph	Single-cancer
BCL2_MCL1	lymph	Single-cancer
BCL2_TP53	bladder,blood,bowel,breast,cnsbrain,esophagusstomach,headandneck,kidney,lung,lymph,ovaryfallopiantube,pancreas,prostate,skin,softtissue,uterus	Multi-cancer
BCL2_TP53BP2	lymph	Single-cancer
BCL2L1_TP53	bladder,bowel,breast,cnsbrain,esophagusstomach,headandneck,lung,lymph,ovaryfallopiantube,pancreas,prostate,skin,softtissue,uterus	Multi-cancer
BCL6_BCOR	bowel	Single-cancer
BCL6_BLZF1	bowel	Single-cancer
BCL6_CCDC36	bowel	Single-cancer
BCL6_DVL2	bowel	Single-cancer
BCL6_ENO1	bowel	Single-cancer
BCL6_GLRX3	bowel	Single-cancer
BCL6_GOLGA2	bowel	Single-cancer
BCL6_KIFC3	bowel	Single-cancer
BCL6_MTUS2	bowel	Single-cancer
BCL6_NCOR1	bowel	Single-cancer
BCL6_PP2150	bowel	Single-cancer
BCL6_SIN3A	bowel	Single-cancer
BCL6_TFIP11	bowel	Single-cancer
BCL6_TRAF1	bowel	Single-cancer
BCL6_TRIM27	bowel	Single-cancer
BCL9_CTNNB1	liver	Single-cancer
BCR_TP53	bladder,bowel,breast,cnsbrain,esophagusstomach,headandneck,lung,lymph,ovaryfallopiantube,pancreas,prostate,skin,softtissue,uterus	Multi-cancer
BEX1_CDH1	breast,esophagusstomach	Multi-cancer
BEX1_FBXW7	bowel,uterus	Multi-cancer
BEX1_FGFR2	uterus	Single-cancer
BEX1_PTEN	uterus	Single-cancer
BEX1_SMAD4	bowel,esophagusstomach,pancreas	Multi-cancer
BEX2_FGFR2	uterus	Single-cancer
BLID_CDH1	breast,esophagusstomach	Multi-cancer
BLID_HRAS	adrenalgland,bladder,headandneck,lung,prostate,skin,softtissue,thymus,thyroid	Multi-cancer
BLK_STAT3	liver	Single-cancer
BLM_TP53	bladder,bowel,breast,cnsbrain,esophagusstomach,headandneck,lung,lymph,ovaryfallopiantube,pancreas,prostate,skin,softtissue,uterus	Multi-cancer
BLMH_PDPK1	skin	Single-cancer
BLNK_ERBB2	biliarytract,bladder,bowel,breast,cervix,esophagusstomach,lung,skin	Multi-cancer
BMI1_EZH2	lymph	Single-cancer
BMP1_TP53	bladder,bowel,breast,cnsbrain,esophagusstomach,headandneck,lung,lymph,ovaryfallopiantube,pancreas,prostate,skin,softtissue,uterus	Multi-cancer
BMX_ERBB2	breast	Single-cancer
BORA_FGFR3	bladder	Single-cancer
BRAF_CCDC88A	biliarytract,bladder,blood,bowel,cnsbrain,lung,lymph,ovaryfallopiantube,pancreas,prostate,skin,thyroid	Multi-cancer
BRAF_HSP90AB1	biliarytract,bladder,blood,bowel,cnsbrain,lung,lymph,ovaryfallopiantube,pancreas,prostate,skin,thyroid	Multi-cancer
BRAF_MAP2K1	biliarytract,bladder,blood,bowel,cnsbrain,lung,lymph,ovaryfallopiantube,pancreas,prostate,skin,thyroid	Multi-cancer
BRAF_MAP3K1	biliarytract,bladder,blood,bowel,cnsbrain,lung,lymph,ovaryfallopiantube,pancreas,prostate,skin,thyroid	Multi-cancer
BRAF_MAPK1	biliarytract,bladder,blood,bowel,cnsbrain,lung,lymph,ovaryfallopiantube,pancreas,prostate,skin,thyroid	Multi-cancer
BRAF_NEDD4L	biliarytract,bladder,blood,bowel,cnsbrain,lung,lymph,ovaryfallopiantube,pancreas,prostate,skin,thyroid	Multi-cancer
BRAF_PAK2	biliarytract,bladder,blood,bowel,cnsbrain,lung,lymph,ovaryfallopiantube,pancreas,prostate,skin,thyroid	Multi-cancer
BRAF_TERF1	biliarytract,bladder,blood,bowel,cnsbrain,lung,lymph,ovaryfallopiantube,pancreas,prostate,skin,thyroid	Multi-cancer
BRCA1_EP300	lymph	Single-cancer
BRCA1_ESR1	breast,uterus	Multi-cancer
BRCA1_TP53	bladder,bowel,breast,cnsbrain,esophagusstomach,headandneck,lung,lymph,ovaryfallopiantube,pancreas,prostate,skin,softtissue,uterus	Multi-cancer
BRCA2_TP53	bladder,bowel,breast,cnsbrain,esophagusstomach,headandneck,lung,lymph,ovaryfallopiantube,pancreas,prostate,skin,softtissue,uterus	Multi-cancer
BRD7_TP53	bladder,breast,cnsbrain,headandneck,lung,uterus	Multi-cancer
BRINP1_RAC1	testis	Single-cancer
BRPF1_HIST1H3A	lung	Single-cancer
BTBD2_SMAD2	bowel	Single-cancer
BTBD2_TP53	bladder,bowel,breast,cnsbrain,esophagusstomach,headandneck,lung,lymph,ovaryfallopiantube,pancreas,prostate,skin,softtissue,uterus	Multi-cancer
BTK_GTF2I	thymus	Single-cancer
BTK_MET	kidney	Single-cancer
BTRC_CTNNB1	adrenalgland,cervix,cnsbrain,esophagusstomach,liver,lung,prostate,skin,uterus	Multi-cancer
BTRC_SMAD4	bowel,esophagusstomach,pancreas	Multi-cancer
C-FGR_EGFR	cnsbrain,lung	Multi-cancer
C1R_EP300	lymph	Single-cancer
C22ORF46_SMAD2	bowel	Single-cancer
C2ORF44_PDPK1	skin	Single-cancer
C2ORF88_MYOD1	softtissue	Single-cancer
C4BPA_GTF2I	thymus	Single-cancer
C6ORF47_FGFR3	bladder	Single-cancer
C7ORF25_EZH2	lymph	Single-cancer
CAB39_STK11	lung	Single-cancer
CACYBP_ERBB2	biliarytract,bladder,bowel,breast,cervix,esophagusstomach,lung,skin	Multi-cancer
CACYBP_ERCC2	bladder	Single-cancer
CAD_XPO1	blood,breast,lymph	Multi-cancer
CALM1_EGFR	cnsbrain,lung	Multi-cancer
CALM1_KRAS	biliarytract,bladder,blood,bowel,esophagusstomach,lung,pancreas,prostate,testis,thyroid,uterus	Multi-cancer
CAMK2D_SMAD4	bowel,esophagusstomach,pancreas	Multi-cancer
CAMLG_EGFR	cnsbrain,lung	Multi-cancer
CAPN1_STAT3	liver	Single-cancer
CAPNS1_STAT3	liver	Single-cancer
CARD11_MAP3K7IP1	lymph	Single-cancer
CARD11_PDPK1	lymph,skin	Multi-cancer
CARD11_PRKCQ	lymph	Single-cancer
CARD11_TAB1	lymph	Single-cancer
CARM1_EP300	lymph	Single-cancer
CASC3_CDKN2A	headandneck,skin	Multi-cancer
CASK_EP300	lymph	Single-cancer
CASP2_RXRA	bladder	Single-cancer
CASP8_PRKCI	bowel	Single-cancer
CAT_KEAP1	lung	Single-cancer
CAV1_EGFR	cnsbrain,lung	Multi-cancer
CAV2_EGFR	cnsbrain,lung	Multi-cancer
CBL_ERBB2	biliarytract,bladder,bowel,breast,cervix,esophagusstomach,lung,skin	Multi-cancer
CBLL1_CDH1	breast,esophagusstomach	Multi-cancer
CBX5_TCEB1	kidney	Single-cancer
CCDC106_TP53	bladder,bowel,breast,cnsbrain,esophagusstomach,headandneck,lung,lymph,ovaryfallopiantube,pancreas,prostate,skin,softtissue,uterus	Multi-cancer
CCDC17_FGFR3	bladder	Single-cancer
CCDC85B_EZH2	lymph	Single-cancer
CCL18_TP53	bladder,bowel,breast,cnsbrain,esophagusstomach,headandneck,lung,lymph,ovaryfallopiantube,pancreas,prostate,skin,softtissue,uterus	Multi-cancer
CCL5_CDH1	esophagusstomach	Single-cancer
CCL5_KRAS	biliarytract,bladder,blood,bowel,esophagusstomach,lung,pancreas,prostate,testis,thyroid,uterus	Multi-cancer
CCNB1IP1_KEAP1	lung	Single-cancer
CCND1_CDKN2A	headandneck,skin	Multi-cancer
CCND1_CTNNB1	bowel,liver,lymph	Multi-cancer
CCND1_ESR1	breast,uterus	Multi-cancer
CCND1_POLR1B	lymph	Single-cancer
CCND1_RB1	lymph	Single-cancer
CCNE1_FBXW7	bowel,uterus	Multi-cancer
CCNH_ERCC2	bladder	Single-cancer
CCT5_TP53	bladder,bowel,breast,cnsbrain,esophagusstomach,headandneck,lung,lymph,ovaryfallopiantube,pancreas,prostate,skin,softtissue,uterus	Multi-cancer
CCT7_KRAS	biliarytract,bladder,blood,bowel,esophagusstomach,lung,pancreas,prostate,testis,thyroid,uterus	Multi-cancer
CD2_EP300	lymph	Single-cancer
CDAN1_PDPK1	skin	Single-cancer
CDC23_RAC1	testis	Single-cancer
CDC25A_SMAD3	bowel	Single-cancer
CDC25A_XPO1	blood,breast,lymph	Multi-cancer
CDC25C_EGFR	cnsbrain,lung	Multi-cancer
CDC27_CDH1	breast,esophagusstomach	Multi-cancer
CDC37_EGFR	cnsbrain,lung	Multi-cancer
CDC37_ERBB2	biliarytract,bladder,bowel,breast,cervix,esophagusstomach,lung,skin	Multi-cancer
CDC37_FGFR3	bladder	Single-cancer
CDC40_SMAD2	bowel	Single-cancer
CDC42_PIK3R1	cnsbrain	Single-cancer
CDC42_PRKCI	bowel	Single-cancer
CDC42_TP53	bladder,blood,bowel,breast,cnsbrain,esophagusstomach,headandneck,kidney,lung,lymph,ovaryfallopiantube,pancreas,prostate,skin,softtissue,uterus	Multi-cancer
CDC45_CDKN2A	headandneck,skin	Multi-cancer
CDC5L_CDKN2A	esophagusstomach,headandneck,lung,skin	Multi-cancer
CDC5L_U2AF1	bladder,blood,lung,pancreas,uterus	Multi-cancer
CDC6_CDKN2A	headandneck,skin	Multi-cancer
CDC7_CDKN2A	headandneck,skin	Multi-cancer
CDH1_CTNNA1	breast,esophagusstomach	Multi-cancer
CDH1_CTNNB1	bowel,liver	Multi-cancer
CDH1_CYP17A1	esophagusstomach	Single-cancer
CDH1_EGFR	breast,cnsbrain,esophagusstomach,lung	Multi-cancer
CDH1_MTA3	breast,esophagusstomach	Multi-cancer
CDH1_NAT2	esophagusstomach	Single-cancer
CDH1_PSEN1	breast,esophagusstomach	Multi-cancer
CDH1_PSMC3IP	breast,esophagusstomach	Multi-cancer
CDH1_SKP2	breast,esophagusstomach	Multi-cancer
CDH1_THRSP	esophagusstomach	Single-cancer
CDH2_CTNNB1	bowel,liver	Multi-cancer
CDH5_CTNNB1	liver	Single-cancer
CDK1_EGFR	cnsbrain,lung	Multi-cancer
CDK1_EZH2	lymph	Single-cancer
CDK12_CDK12	bowel	Single-cancer
CDK4_CDKN1A	lung,skin	Multi-cancer
CDK4_CDKN1B	lung,skin	Multi-cancer
CDK4_CDKN2B	lung,skin	Multi-cancer
CDK4_CDKN2C	lung,skin	Multi-cancer
CDK4_CDKN2D	lung,skin	Multi-cancer
CDK4_TGFBR1	bowel	Single-cancer
CDK5R1_CTNNB1	liver	Single-cancer
CDK6_CDKN2A	esophagusstomach,headandneck,lung,skin	Multi-cancer
CDKN1A_TP53	bladder,breast,cnsbrain,headandneck,lung	Multi-cancer
CDKN2A_CDKN2A	bladder,bowel,esophagusstomach,headandneck,lung,pancreas,skin	Multi-cancer
CDKN2A_CDKN2AIP	esophagusstomach,headandneck,lung,skin	Multi-cancer
CDKN2A_CRELD2	headandneck,skin	Multi-cancer
CDKN2A_DEAF1	headandneck,skin	Multi-cancer
CDKN2A_E2F1	headandneck,skin	Multi-cancer
CDKN2A_FN1	esophagusstomach,headandneck,lung,skin	Multi-cancer
CDKN2A_GMNN	headandneck,skin	Multi-cancer
CDKN2A_HAUS1	headandneck,skin	Multi-cancer
CDKN2A_HNRNPU	esophagusstomach,headandneck,lung,skin	Multi-cancer
CDKN2A_MCM10	esophagusstomach,headandneck,lung,skin	Multi-cancer
CDKN2A_MCM2	esophagusstomach,headandneck,lung,skin	Multi-cancer
CDKN2A_MCM5	headandneck,skin	Multi-cancer
CDKN2A_MDM2	headandneck,skin	Multi-cancer
CDKN2A_NAT2	headandneck,skin	Multi-cancer
CDKN2A_ORC4	headandneck,skin	Multi-cancer
CDKN2A_ORC5	headandneck,skin	Multi-cancer
CDKN2A_ORC5L	headandneck,skin	Multi-cancer
CDKN2A_PRKCA	headandneck,skin	Multi-cancer
CDKN2A_Q96BA7	headandneck,skin	Multi-cancer
CDKN2A_Q9UQS6	headandneck,skin	Multi-cancer
CDKN2A_SERTAD1	headandneck,skin	Multi-cancer
CDKN2A_TDRD7	esophagusstomach,headandneck,lung,skin	Multi-cancer
CDKN2A_TP53	bladder,bowel,breast,cnsbrain,esophagusstomach,headandneck,lung,lymph,ovaryfallopiantube,pancreas,prostate,skin,softtissue,uterus	Multi-cancer
CDKN2A_UBC	esophagusstomach,headandneck,lung,skin	Multi-cancer
CDKN2A_VHL	headandneck,kidney,skin	Multi-cancer
CDKN2A_WHSC1L1	esophagusstomach,headandneck,lung,skin	Multi-cancer
CDKN2C_TP53	bladder,bowel,breast,cnsbrain,esophagusstomach,headandneck,lung,lymph,ovaryfallopiantube,pancreas,prostate,skin,softtissue,uterus	Multi-cancer
CEBPB_SMAD4	bowel,esophagusstomach,pancreas	Multi-cancer
CENPC_TCEB1	kidney	Single-cancer
CENPT_ESR1	breast,uterus	Multi-cancer
CEP126_FGFR3	bladder	Single-cancer
CEP63_EZH2	lymph	Single-cancer
CFAP36_RAC1	testis	Single-cancer
CFH_EP300	lymph	Single-cancer
CFH_SMAD3	bowel	Single-cancer
CFL1_EGFR	cnsbrain,lung	Multi-cancer
CFL1_ESR1	breast	Single-cancer
CHAF1A_HIST1H3A	lung	Single-cancer
CHD3_TP53	bladder,bowel,breast,cnsbrain,esophagusstomach,headandneck,lung,lymph,ovaryfallopiantube,pancreas,prostate,skin,softtissue,uterus	Multi-cancer
CHEK1_SMAD4	bowel,esophagusstomach,pancreas	Multi-cancer
CHEK1_TP53	bladder,blood,bowel,breast,cnsbrain,esophagusstomach,headandneck,kidney,lung,lymph,ovaryfallopiantube,pancreas,prostate,skin,softtissue,uterus	Multi-cancer
CHEK2_TP53	bladder,blood,bowel,breast,cnsbrain,esophagusstomach,headandneck,kidney,lung,lymph,ovaryfallopiantube,pancreas,prostate,skin,softtissue,uterus	Multi-cancer
CHGB_FGFR3	bladder	Single-cancer
CHGB_PTEN	bowel,uterus	Multi-cancer
CHN2_ERBB3	bladder,breast	Multi-cancer
CHRD_SMAD3	bowel	Single-cancer
CHUK_CTNNB1	bowel,liver	Multi-cancer
CISH_EGFR	cnsbrain,lung	Multi-cancer
CISH_ERBB2	biliarytract,bladder,bowel,breast,cervix,esophagusstomach,lung,skin	Multi-cancer
CIT_RHOA	bladder	Single-cancer
CLASRP_SMAD3	bowel	Single-cancer
CLCN6_ERBB2	biliarytract,bladder,bowel,breast,cervix,esophagusstomach,lung,skin	Multi-cancer
CLIP2_MAX	bowel,cnsbrain	Multi-cancer
CLNK_EGFR	cnsbrain,lung	Multi-cancer
CLNK_ERBB2	biliarytract,bladder,bowel,breast,cervix,esophagusstomach,lung,skin	Multi-cancer
CLTC_EP300	lymph	Single-cancer
CLU_KEAP1	lung	Single-cancer
CNKSR1_RHOA	bowel,esophagusstomach,headandneck	Multi-cancer
CNKSR1_SMAD4	bowel,esophagusstomach,pancreas	Multi-cancer
CNOT4_EP300	lymph	Single-cancer
COG5_RAC1	testis	Single-cancer
COIII_KRAS	biliarytract,bladder,blood,bowel,esophagusstomach,lung,pancreas,prostate,testis,thyroid,uterus	Multi-cancer
COIII_RAC1	testis	Single-cancer
COPS5_MAX	blood,bowel,cnsbrain,uterus	Multi-cancer
COPS6_EP300	lymph	Single-cancer
COPS6_PTEN	breast,uterus	Multi-cancer
COX17_TP53	bladder,blood,bowel,breast,cnsbrain,esophagusstomach,headandneck,kidney,lung,lymph,ovaryfallopiantube,pancreas,prostate,skin,softtissue,uterus	Multi-cancer
CPSF7_SMAD3	bowel	Single-cancer
CREB1_EP300	lymph	Single-cancer
CREBBP_CTNNB1	liver	Single-cancer
CREBBP_ESR1	breast,uterus	Multi-cancer
CREBBP_FOXO1	lymph	Single-cancer
CREBBP_HIST1H3A	lung	Single-cancer
CREBBP_MYOD1	softtissue	Single-cancer
CREBBP_NFE2L2	esophagusstomach,headandneck,lung	Multi-cancer
CREBBP_SMAD2	bowel	Single-cancer
CREBBP_SMAD3	bowel	Single-cancer
CRELD2_RAC1	testis	Single-cancer
CRK_EGFR	cnsbrain,lung	Multi-cancer
CRK_ERBB2	biliarytract,bladder,bowel,breast,cervix,esophagusstomach,lung,skin	Multi-cancer
CRK_ERBB3	bladder,breast	Multi-cancer
CRK_MET	kidney	Single-cancer
CRK_TP53	bladder,blood,bowel,breast,cnsbrain,esophagusstomach,headandneck,kidney,lung,lymph,ovaryfallopiantube,pancreas,prostate,skin,softtissue,uterus	Multi-cancer
CRKL_EGFR	cnsbrain,lung	Multi-cancer
CRKL_ERBB2	biliarytract,bladder,bowel,breast,cervix,esophagusstomach,lung,skin	Multi-cancer
CRKL_ERBB3	bladder,breast	Multi-cancer
CSN2_RAC1	testis	Single-cancer
CSNK2A1_PTEN	breast,uterus	Multi-cancer
CSNK2A1_TP53	bladder,bowel,breast,cnsbrain,esophagusstomach,headandneck,lung,lymph,ovaryfallopiantube,pancreas,prostate,skin,softtissue,uterus	Multi-cancer
CSNK2A1_VHL	kidney	Single-cancer
CSNK2B_RXRA	bladder	Single-cancer
CSNK2B_TP53	bladder,blood,bowel,breast,cnsbrain,esophagusstomach,headandneck,kidney,lung,lymph,ovaryfallopiantube,pancreas,prostate,skin,softtissue,uterus	Multi-cancer
CSRP1_ESR1	breast	Single-cancer
CSRP3_MYOD1	softtissue	Single-cancer
CTNNA2_CTNNB1	bowel,liver	Multi-cancer
CTNNB1_CTNNBIP1	liver	Single-cancer
CTNNB1_EP300	liver,lymph	Multi-cancer
CTNNB1_ERBB2	biliarytract,bladder,bowel,breast,cervix,esophagusstomach,liver,lung,skin	Multi-cancer
CTNNB1_ERBB2IP	liver	Single-cancer
CTNNB1_GSK3A	bowel,liver	Multi-cancer
CTNNB1_GSK3B	bowel,liver	Multi-cancer
CTNNB1_HLA-A	adrenalgland,bladder,cervix,cnsbrain,esophagusstomach,liver,lung,ovaryfallopiantube,prostate,skin,uterus	Multi-cancer
CTNNB1_JUN	liver	Single-cancer
CTNNB1_LEF1	bowel,liver	Multi-cancer
CTNNB1_NEK2	bowel,liver	Multi-cancer
CTNNB1_NFKB1	liver	Single-cancer
CTNNB1_NR3C4	bowel,liver	Multi-cancer
CTNNB1_NR5A2	bowel,liver	Multi-cancer
CTNNB1_PSEN1	bowel,liver	Multi-cancer
CTNNB1_PTPN12	liver	Single-cancer
CTNNB1_PTPRB	liver	Single-cancer
CTNNB1_PTPRC	liver	Single-cancer
CTNNB1_PTPRF	liver	Single-cancer
CTNNB1_PTPRG	liver	Single-cancer
CTNNB1_PTPRJ	liver	Single-cancer
CTNNB1_PTPRO	liver	Single-cancer
CTNNB1_Q9UII7	bowel,liver	Multi-cancer
CTNNB1_RABAC1	liver	Single-cancer
CTNNB1_RUVBL2	liver	Single-cancer
CTNNB1_SKP1	bowel,liver	Multi-cancer
CTNNB1_SMARCA4	liver	Single-cancer
CTNNB1_TAX1BP3	liver	Single-cancer
CTNNB1_TBL1X	liver	Single-cancer
CTNNB1_TCF4	liver	Single-cancer
CTNNB1_TCF7L2	liver	Single-cancer
CTNNB1_UBE2B	liver	Single-cancer
CTNNB1_ZFYVE9	liver	Single-cancer
CTNND1_EGFR	cnsbrain,lung	Multi-cancer
CTPS2_FGFR1	cnsbrain	Single-cancer
CTSK_FGFR3	bladder	Single-cancer
CUL1_FBXW7	bowel,uterus	Multi-cancer
CUL5_SMAD2	bowel	Single-cancer
CUL7_TP53	bladder,bowel,breast,cnsbrain,esophagusstomach,headandneck,lung,lymph,ovaryfallopiantube,pancreas,prostate,skin,softtissue,uterus	Multi-cancer
CUL9_TP53	bladder,bowel,breast,cnsbrain,esophagusstomach,headandneck,lung,lymph,ovaryfallopiantube,pancreas,prostate,skin,softtissue,uterus	Multi-cancer
CUX1_MAX	bowel,cnsbrain	Multi-cancer
CXCL1_ESR1	breast	Single-cancer
CXCL1_HRAS	adrenalgland,bladder,headandneck,lung,prostate,skin,softtissue,thyroid	Multi-cancer
CXCL1_PTEN	breast,uterus	Multi-cancer
CYB_KRAS	biliarytract,bladder,blood,bowel,esophagusstomach,lung,pancreas,prostate,testis,thyroid,uterus	Multi-cancer
CYFIP2_SMAD4	bowel,esophagusstomach,pancreas	Multi-cancer
CYP11A1_SMAD2	bowel	Single-cancer
CYP17A1_ERBB2	biliarytract,bladder,bowel,breast,cervix,esophagusstomach,lung,skin	Multi-cancer
D2HGDH_STK11	lung	Single-cancer
DAAM1_RHOA	bowel,esophagusstomach,headandneck	Multi-cancer
DAB1_ERBB2	biliarytract,bladder,bowel,breast,cervix,esophagusstomach,lung,skin	Multi-cancer
DAB1_ERBB3	bladder,breast	Multi-cancer
DAO_EP300	lymph	Single-cancer
DAPP1_ERBB3	bladder,breast	Multi-cancer
DAXX_SPOP	prostate	Single-cancer
DAXX_TP53	bladder,bowel,breast,cnsbrain,esophagusstomach,headandneck,lung,lymph,ovaryfallopiantube,pancreas,prostate,skin,softtissue,uterus	Multi-cancer
DCAF6_SMAD2	bowel	Single-cancer
DCN_EGFR	cnsbrain,lung	Multi-cancer
DCP1A_SMAD4	bowel,esophagusstomach,pancreas	Multi-cancer
DCP1B_SMAD4	bowel,esophagusstomach,pancreas	Multi-cancer
DDIT3_EP300	lymph	Single-cancer
DDIT3_SPOP	prostate,uterus	Multi-cancer
DDX19A_XPO1	blood,breast,lymph	Multi-cancer
DDX47_KRAS	biliarytract,bladder,blood,bowel,esophagusstomach,lung,pancreas,prostate,testis,thyroid,uterus	Multi-cancer
DDX5_EP300	lymph	Single-cancer
DDX5_ESR1	breast,uterus	Multi-cancer
DDX5_TP53	bladder,blood,bowel,breast,cnsbrain,esophagusstomach,headandneck,kidney,lung,lymph,ovaryfallopiantube,pancreas,prostate,skin,softtissue,uterus	Multi-cancer
DDX50_KRAS	biliarytract,bladder,blood,bowel,esophagusstomach,lung,pancreas,prostate,testis,thyroid,uterus	Multi-cancer
DDX54_ESR1	breast,uterus	Multi-cancer
DEAF1_HRAS	adrenalgland,bladder,headandneck,lung,prostate,skin,softtissue,thyroid	Multi-cancer
DEAF1_KRAS	biliarytract,bladder,blood,bowel,esophagusstomach,lung,pancreas,prostate,testis,thyroid,uterus	Multi-cancer
DECR2_EP300	lymph	Single-cancer
DIAPH1_RHOA	headandneck	Single-cancer
DIPLA1_SMAD2	bowel	Single-cancer
DIRAS3_KRAS	biliarytract,bladder,blood,bowel,esophagusstomach,lung,pancreas,prostate,testis,thyroid,uterus	Multi-cancer
DKFZP434G2016_RAC1	testis	Single-cancer
DKFZP434N041_SMAD2	bowel	Single-cancer
DKFZP434N041_SMAD4	bowel,esophagusstomach,pancreas	Multi-cancer
DKFZP434N101_FGFR1	cnsbrain	Single-cancer
DKFZP451F1115_RAC1	testis	Single-cancer
DKFZP451F1115_RHOA	bowel,esophagusstomach,headandneck	Multi-cancer
DKFZP451O0517_ERBB4	bladder	Single-cancer
DKFZP666O0110_RAC1	testis	Single-cancer
DKFZP686H01244_KEAP1	lung	Single-cancer
DKFZP686L11144_SMAD4	bowel,esophagusstomach,pancreas	Multi-cancer
DKFZP686M02159_GTF2I	thymus	Single-cancer
DKFZP686N0152_STK11	lung	Single-cancer
DKFZP761H172_MAX	bowel,cnsbrain	Multi-cancer
DKFZP781O1323_SMAD4	biliarytract,bowel,breast,esophagusstomach,lung,pancreas	Multi-cancer
DLEU1_TP53	bladder,bowel,breast,cnsbrain,esophagusstomach,headandneck,lung,lymph,ovaryfallopiantube,pancreas,prostate,skin,softtissue,uterus	Multi-cancer
DLG1_PTEN	bowel,uterus	Multi-cancer
DLG3_ERBB4	bladder	Single-cancer
DLG4_ERBB4	bladder	Single-cancer
DNAJA3_KRAS	biliarytract,bladder,blood,bowel,esophagusstomach,lung,pancreas,prostate,testis,thyroid,uterus	Multi-cancer
DNAJA3_MET	kidney	Single-cancer
DNAJB1_NRAS	biliarytract,bladder,blood,bowel,cnsbrain,esophagusstomach,headandneck,lung,ovaryfallopiantube,skin,softtissue,testis,thymus,thyroid,uterus	Multi-cancer
DNAJB11_EZH2	lymph	Single-cancer
DNAJB5_SMAD2	bowel	Single-cancer
DNAJC7_SMAD2	bowel	Single-cancer
DNMT1_EZH2	lymph	Single-cancer
DNMT3A_FLJ00340	blood,lymph	Multi-cancer
DNMT3A_PIAS1	blood,lymph	Multi-cancer
DNMT3A_PIAS2	blood,lymph	Multi-cancer
DNMT3A_SP100	blood,lymph	Multi-cancer
DNMT3A_TCL1A	blood,lymph	Multi-cancer
DNMT3A_TERF2IP	blood,lymph	Multi-cancer
DNMT3A_UBE2I	blood,lymph	Multi-cancer
DNMT3B_EZH2	lymph	Single-cancer
DOCK1_RAC1	skin,testis	Multi-cancer
DOCK2_RAC1	skin,testis	Multi-cancer
DOCK8_SMAD2	bowel	Single-cancer
DOK1_EGFR	cnsbrain,lung	Multi-cancer
DOK1_ERBB2	biliarytract,bladder,bowel,breast,cervix,esophagusstomach,lung,skin	Multi-cancer
DOK4_EGFR	cnsbrain,lung	Multi-cancer
DOK4_ERBB2	biliarytract,bladder,bowel,breast,cervix,esophagusstomach,lung,skin	Multi-cancer
DOK5_EGFR	cnsbrain,lung	Multi-cancer
DOK6_EGFR	cnsbrain,lung	Multi-cancer
DOK6_ERBB2	biliarytract,bladder,bowel,breast,cervix,esophagusstomach,lung,skin	Multi-cancer
DPP3_KEAP1	lung	Single-cancer
DPPA2_SPOP	prostate	Single-cancer
DPY30_GTF2I	thymus	Single-cancer
DUT_ESR1	breast	Single-cancer
DVL2_TP53	bladder,bowel,breast,cnsbrain,esophagusstomach,headandneck,lung,lymph,ovaryfallopiantube,pancreas,prostate,skin,softtissue,uterus	Multi-cancer
DYNC1H1_MAX	bowel,cnsbrain	Multi-cancer
DYNC1H1_SMAD2	bowel	Single-cancer
DYRK1B_HNF1A	lymph,uterus	Multi-cancer
E2F5_EP300	lymph	Single-cancer
E9KL35_RHOA	bowel,esophagusstomach,headandneck	Multi-cancer
EAF2_TP53	bladder,breast,cnsbrain,headandneck,lung,uterus	Multi-cancer
ECH1_STAT3	liver	Single-cancer
EDG2_KRAS	biliarytract,bladder,blood,bowel,esophagusstomach,lung,pancreas,prostate,testis,thyroid,uterus	Multi-cancer
EEA1_EGFR	cnsbrain,lung	Multi-cancer
EEF1A1_KRAS	biliarytract,bladder,blood,bowel,esophagusstomach,lung,pancreas,prostate,testis,thyroid,uterus	Multi-cancer
EEF1A1_NRAS	biliarytract,bladder,blood,bowel,cnsbrain,esophagusstomach,headandneck,lung,ovaryfallopiantube,skin,softtissue,testis,thymus,thyroid,uterus	Multi-cancer
EEF1A1_SMAD2	bowel	Single-cancer
EEF1A1_SMAD4	bowel,esophagusstomach,pancreas	Multi-cancer
EFNB3_TCEB1	kidney	Single-cancer
EGFR_EGFR	cnsbrain,lung	Multi-cancer
EGFR_EPS8	cnsbrain,lung	Multi-cancer
EGFR_ERBB2	bladder,lung	Multi-cancer
EGFR_ERBB3	bowel,breast,esophagusstomach,lung	Multi-cancer
EGFR_ERRFI1	lung	Single-cancer
EGFR_FKBP5	cnsbrain,lung	Multi-cancer
EGFR_GAB1	cnsbrain,lung	Multi-cancer
EGFR_GAPDH	cnsbrain,lung	Multi-cancer
EGFR_GRAP2	cnsbrain,lung	Multi-cancer
EGFR_GRB10	cnsbrain,lung	Multi-cancer
EGFR_GRB2	cnsbrain,lung	Multi-cancer
EGFR_HDAC6	cnsbrain,lung	Multi-cancer
EGFR_HDAC7	cnsbrain,lung	Multi-cancer
EGFR_HEL-S-1	cnsbrain,lung	Multi-cancer
EGFR_HEL-S-162EP	cnsbrain,lung	Multi-cancer
EGFR_HEL-S-72	cnsbrain,lung	Multi-cancer
EGFR_HEL-S-72P	cnsbrain,lung	Multi-cancer
EGFR_HSP90AA1	cnsbrain,lung	Multi-cancer
EGFR_HSP90AB1	cnsbrain,lung	Multi-cancer
EGFR_HSPA1A	cnsbrain,lung	Multi-cancer
EGFR_HSPA1B	cnsbrain,lung	Multi-cancer
EGFR_HSPA4	cnsbrain,lung	Multi-cancer
EGFR_HSPA8	cnsbrain,lung	Multi-cancer
EGFR_HSPA9	cnsbrain,lung	Multi-cancer
EGFR_IKBKG	cnsbrain,lung	Multi-cancer
EGFR_IRS1	lung	Single-cancer
EGFR_IRS4	cnsbrain,lung	Multi-cancer
EGFR_ITGB2	cnsbrain,lung	Multi-cancer
EGFR_ITK	lung	Single-cancer
EGFR_ITSN2	cnsbrain,lung	Multi-cancer
EGFR_JUP	cnsbrain,lung	Multi-cancer
EGFR_LAMP1	cnsbrain,lung	Multi-cancer
EGFR_LAT	cnsbrain,lung	Multi-cancer
EGFR_LCP2	cnsbrain,lung	Multi-cancer
EGFR_MAP3K3	cnsbrain,lung	Multi-cancer
EGFR_MAP4K1	cnsbrain,lung	Multi-cancer
EGFR_MAPK8	cnsbrain,lung	Multi-cancer
EGFR_MAPK8IP1	cnsbrain,lung	Multi-cancer
EGFR_MAPK8IP2	cnsbrain,lung	Multi-cancer
EGFR_MAPK9	cnsbrain,lung	Multi-cancer
EGFR_MAPT	cnsbrain,lung	Multi-cancer
EGFR_MUC1	cnsbrain,lung	Multi-cancer
EGFR_NCK1	cnsbrain,lung	Multi-cancer
EGFR_NCK2	cnsbrain,lung	Multi-cancer
EGFR_NEDD4	cnsbrain,lung	Multi-cancer
EGFR_NR3C1	cnsbrain,lung	Multi-cancer
EGFR_NTRK2	lung	Single-cancer
EGFR_NUDCD3	cnsbrain,lung	Multi-cancer
EGFR_NUMB	cnsbrain,lung	Multi-cancer
EGFR_NUMBL	cnsbrain,lung	Multi-cancer
EGFR_PAK1	cnsbrain,lung	Multi-cancer
EGFR_PDCD6IP	cnsbrain,lung	Multi-cancer
EGFR_PDGFRA	lung	Single-cancer
EGFR_PIK3C2B	cnsbrain,lung	Multi-cancer
EGFR_PIK3R1	cnsbrain,lung	Multi-cancer
EGFR_PIK3R2	cnsbrain,lung	Multi-cancer
EGFR_PIK3R3	cnsbrain,lung	Multi-cancer
EGFR_PIM1	cnsbrain,lung	Multi-cancer
EGFR_PLCG1	cnsbrain,lung	Multi-cancer
EGFR_PLCG2	cnsbrain,lung	Multi-cancer
EGFR_PPP5C	cnsbrain,lung	Multi-cancer
EGFR_PRKCA	cnsbrain,lung	Multi-cancer
EGFR_PRKCE	cnsbrain,lung	Multi-cancer
EGFR_PRKCZ	cnsbrain,lung	Multi-cancer
EGFR_PTPN1	cnsbrain,lung	Multi-cancer
EGFR_PTPN11	cnsbrain,lung	Multi-cancer
EGFR_PTPN12	cnsbrain,lung	Multi-cancer
EGFR_PTPN18	cnsbrain,lung	Multi-cancer
EGFR_PTPN22	cnsbrain,lung	Multi-cancer
EGFR_PTPRB	cnsbrain,lung	Multi-cancer
EGFR_PTPRC	cnsbrain,lung	Multi-cancer
EGFR_PTPRJ	cnsbrain,lung	Multi-cancer
EGFR_Q53FC7	cnsbrain,lung	Multi-cancer
EGFR_Q53HG7	cnsbrain,lung	Multi-cancer
EGFR_Q59EA3	cnsbrain,lung	Multi-cancer
EGFR_Q59FG2	cnsbrain,lung	Multi-cancer
EGFR_Q59GY7	cnsbrain,lung	Multi-cancer
EGFR_Q7Z4F3	cnsbrain,lung	Multi-cancer
EGFR_Q86SX1	cnsbrain,lung	Multi-cancer
EGFR_Q8TAS0	cnsbrain,lung	Multi-cancer
EGFR_Q96BE0	cnsbrain,lung	Multi-cancer
EGFR_Q9HA84	cnsbrain,lung	Multi-cancer
EGFR_Q9UII7	cnsbrain,lung	Multi-cancer
EGFR_RAF1	lung	Single-cancer
EGFR_RAPGEF1	cnsbrain,lung	Multi-cancer
EGFR_RASA1	cnsbrain,lung	Multi-cancer
EGFR_RGS4	cnsbrain,lung	Multi-cancer
EGFR_RIN2	cnsbrain,lung	Multi-cancer
EGFR_RUTBC1	cnsbrain,lung	Multi-cancer
EGFR_S100A4	cnsbrain,lung	Multi-cancer
EGFR_SFN	cnsbrain,lung	Multi-cancer
EGFR_SGSM2	cnsbrain,lung	Multi-cancer
EGFR_SH2B1	cnsbrain,lung	Multi-cancer
EGFR_SH2B3	cnsbrain,lung	Multi-cancer
EGFR_SH2D1A	cnsbrain,lung	Multi-cancer
EGFR_SH2D2A	cnsbrain,lung	Multi-cancer
EGFR_SH2D3A	cnsbrain,lung	Multi-cancer
EGFR_SH2D3C	cnsbrain,lung	Multi-cancer
EGFR_SH3GL2	cnsbrain,lung	Multi-cancer
EGFR_SH3GL3	cnsbrain,lung	Multi-cancer
EGFR_SHC1	cnsbrain,lung	Multi-cancer
EGFR_SHC2	lung	Single-cancer
EGFR_SHC3	cnsbrain,lung	Multi-cancer
EGFR_SHC4	cnsbrain,lung	Multi-cancer
EGFR_SLA	cnsbrain,lung	Multi-cancer
EGFR_SLA2	cnsbrain,lung	Multi-cancer
EGFR_SNCA	cnsbrain,lung	Multi-cancer
EGFR_SNX1	cnsbrain,lung	Multi-cancer
EGFR_SNX9	cnsbrain,lung	Multi-cancer
EGFR_SOCS3	cnsbrain,lung	Multi-cancer
EGFR_SOCS6	cnsbrain,lung	Multi-cancer
EGFR_SOS2	cnsbrain,lung	Multi-cancer
EGFR_STAP2	cnsbrain,lung	Multi-cancer
EGFR_STAT1	cnsbrain,lung	Multi-cancer
EGFR_STAT2	cnsbrain,lung	Multi-cancer
EGFR_STAT3	cnsbrain,liver,lung	Multi-cancer
EGFR_STUB1	cnsbrain,lung	Multi-cancer
EGFR_TAB1	cnsbrain,lung	Multi-cancer
EGFR_TLN1	cnsbrain,lung	Multi-cancer
EGFR_TLR2	cnsbrain,lung	Multi-cancer
EGFR_TNFRSF1A	cnsbrain,lung	Multi-cancer
EGFR_TNS3	cnsbrain,lung	Multi-cancer
EGFR_TNS4	cnsbrain,lung	Multi-cancer
EGFR_TRAF2	cnsbrain,lung	Multi-cancer
EGFR_TUBA1A	cnsbrain,lung	Multi-cancer
EGFR_TXN	cnsbrain,lung	Multi-cancer
EGFR_VAV1	cnsbrain,lung	Multi-cancer
EGFR_WASF3	cnsbrain,lung	Multi-cancer
EGFR_WASL	cnsbrain,lung	Multi-cancer
EGFR_YWHAQ	cnsbrain,lung	Multi-cancer
EGFR_YWHAZ	cnsbrain,lung	Multi-cancer
EGLN1_KRAS	biliarytract,bladder,blood,bowel,esophagusstomach,lung,pancreas,prostate,testis,thyroid,uterus	Multi-cancer
EGR1_EP300	lymph	Single-cancer
EHMT1_TP53	bladder,bowel,breast,cnsbrain,esophagusstomach,headandneck,lung,lymph,ovaryfallopiantube,pancreas,prostate,skin,softtissue,uterus	Multi-cancer
EIF2S2_TP53	cnsbrain,lung	Multi-cancer
EIF3L_SMAD2	bowel	Single-cancer
ENO1_EP300	lymph	Single-cancer
EP300_EPO	lymph	Single-cancer
EP300_ESR1	breast,lymph,uterus	Multi-cancer
EP300_ETV1	lymph	Single-cancer
EP300_EWSR1	lymph	Single-cancer
EP300_FBXL5	lymph	Single-cancer
EP300_FBXO25	lymph	Single-cancer
EP300_FEN1	lymph	Single-cancer
EP300_FN1	lymph	Single-cancer
EP300_FOS	lymph	Single-cancer
EP300_FOXO1	lymph	Single-cancer
EP300_GAA	lymph	Single-cancer
EP300_GOLGA2	lymph	Single-cancer
EP300_GOPC	lymph	Single-cancer
EP300_GRB2	lymph	Single-cancer
EP300_HIST1H1A	lymph	Single-cancer
EP300_HIST1H2AB	lymph	Single-cancer
EP300_HIST1H2BB	lymph	Single-cancer
EP300_HIST1H3A	lung,lymph	Multi-cancer
EP300_HIST2H2AB	lymph	Single-cancer
EP300_HIST2H2AC	lymph	Single-cancer
EP300_HIST2H2BE	lymph	Single-cancer
EP300_HIST3H3	lymph	Single-cancer
EP300_HNRNPUL1	lymph	Single-cancer
EP300_HPS6	lymph	Single-cancer
EP300_IGBP1	lymph	Single-cancer
EP300_IMMT	lymph	Single-cancer
EP300_ITIH3	lymph	Single-cancer
EP300_JUN	lymph	Single-cancer
EP300_KAT2B	lymph	Single-cancer
EP300_KCTD5	lymph	Single-cancer
EP300_KHDRBS1	lymph	Single-cancer
EP300_KRT18	lymph	Single-cancer
EP300_LCP2	lymph	Single-cancer
EP300_MAGED1	lymph	Single-cancer
EP300_MAP3K5	lymph	Single-cancer
EP300_MAPK1	lymph	Single-cancer
EP300_MAPRE1	lymph	Single-cancer
EP300_MAX	bowel,cnsbrain,lymph	Multi-cancer
EP300_MCM3AP	lymph	Single-cancer
EP300_MDM2	lymph	Single-cancer
EP300_MSTO1	lymph	Single-cancer
EP300_MYC	lymph	Single-cancer
EP300_NAP1L1	lymph	Single-cancer
EP300_NOXA1	lymph	Single-cancer
EP300_NPY5R	lymph	Single-cancer
EP300_NR1C1	lymph	Single-cancer
EP300_NR1I1	lymph	Single-cancer
EP300_NR1I3	lymph	Single-cancer
EP300_NR4A1	lymph	Single-cancer
EP300_PAK2	lymph	Single-cancer
EP300_PC4	lymph	Single-cancer
EP300_PCBD1	lymph	Single-cancer
EP300_PCK2	lymph	Single-cancer
EP300_PLG	lymph	Single-cancer
EP300_PLK1	lymph	Single-cancer
EP300_PLSCR1	lymph	Single-cancer
EP300_PLSCR2	lymph	Single-cancer
EP300_POLD2	lymph	Single-cancer
EP300_PPARA	lymph	Single-cancer
EP300_PPARG	lymph	Single-cancer
EP300_PRDX4	lymph	Single-cancer
EP300_PS1TP5BP1	lymph	Single-cancer
EP300_Q9H2B0	lymph	Single-cancer
EP300_Q9UBT1	lymph	Single-cancer
EP300_RB1	lymph	Single-cancer
EP300_RELA	lymph	Single-cancer
EP300_RPL27	lymph	Single-cancer
EP300_RUNX1	lymph	Single-cancer
EP300_SAV1	lymph	Single-cancer
EP300_SEPP1	lymph	Single-cancer
EP300_SERPINA5	lymph	Single-cancer
EP300_SERTAD1	lymph	Single-cancer
EP300_SIRT2	lymph	Single-cancer
EP300_SMAD2	bowel,lymph	Multi-cancer
EP300_SMAD3	bowel,lymph	Multi-cancer
EP300_SMAD4	bowel,esophagusstomach,lymph,pancreas	Multi-cancer
EP300_SMARCD1	lymph	Single-cancer
EP300_SP1	lymph	Single-cancer
EP300_SREBF1	lymph	Single-cancer
EP300_STAT3	lymph	Single-cancer
EP300_STAT5A	lymph	Single-cancer
EP300_THPO	lymph	Single-cancer
EP300_TINAGL1	lymph	Single-cancer
EP300_TNIP2	lymph	Single-cancer
EP300_TP63	lymph	Single-cancer
EP300_TP73	lymph	Single-cancer
EP300_TRAF2	lymph	Single-cancer
EP300_TSNAX	lymph	Single-cancer
EP300_UBC	lymph	Single-cancer
EP300_UBQLN1	lymph	Single-cancer
EP300_VDR	lymph	Single-cancer
EP300_VPS18	lymph	Single-cancer
EP300_WASL	lymph	Single-cancer
EP300_WDR59	lymph	Single-cancer
EP300_XRCC6	lymph	Single-cancer
EP300_YY1	lymph	Single-cancer
EP300_ZC3H12A	lymph	Single-cancer
EPAS1_SMAD3	bowel	Single-cancer
EPAS1_VHL	kidney	Single-cancer
EPRS_XPO1	blood,breast,lymph	Multi-cancer
EPSTI1_ESR1	breast	Single-cancer
ERBB2_ERBB2	biliarytract,bladder,bowel,breast,cervix,esophagusstomach,lung,skin,uterus	Multi-cancer
ERBB2_ERBB3	bladder	Single-cancer
ERBB2_EZR	biliarytract,bladder,bowel,breast,cervix,esophagusstomach,lung,skin	Multi-cancer
ERBB2_FKBP5	biliarytract,bladder,bowel,breast,cervix,esophagusstomach,lung,skin	Multi-cancer
ERBB2_GLCE	biliarytract,bladder,bowel,breast,cervix,esophagusstomach,lung,skin	Multi-cancer
ERBB2_GMPR2	biliarytract,bladder,bowel,breast,cervix,esophagusstomach,lung,skin	Multi-cancer
ERBB2_GRAP2	biliarytract,bladder,bowel,breast,cervix,esophagusstomach,lung,skin	Multi-cancer
ERBB2_GRB2	biliarytract,bladder,bowel,breast,cervix,esophagusstomach,lung,skin	Multi-cancer
ERBB2_HDAC6	biliarytract,bladder,bowel,breast,cervix,esophagusstomach,lung,skin	Multi-cancer
ERBB2_HDLBP	biliarytract,bladder,bowel,breast,cervix,esophagusstomach,lung,skin	Multi-cancer
ERBB2_HSP90AA1	biliarytract,bladder,bowel,breast,cervix,esophagusstomach,lung,skin	Multi-cancer
ERBB2_HSP90AB1	biliarytract,bladder,bowel,breast,cervix,esophagusstomach,lung,skin	Multi-cancer
ERBB2_IARS	biliarytract,bladder,bowel,breast,cervix,esophagusstomach,lung,skin	Multi-cancer
ERBB2_IL13RA2	biliarytract,bladder,bowel,breast,cervix,esophagusstomach,lung,skin	Multi-cancer
ERBB2_IRS1	biliarytract,bladder,bowel,breast,cervix,esophagusstomach,lung,skin	Multi-cancer
ERBB2_IRS4	biliarytract,bladder,bowel,breast,cervix,esophagusstomach,lung,skin	Multi-cancer
ERBB2_ITK	bladder,bowel,breast,esophagusstomach,lung,uterus	Multi-cancer
ERBB2_JUP	biliarytract,bladder,bowel,breast,cervix,esophagusstomach,lung,skin	Multi-cancer
ERBB2_KLK5	biliarytract,bladder,bowel,breast,cervix,esophagusstomach,lung,skin	Multi-cancer
ERBB2_LYPD3	biliarytract,bladder,bowel,breast,cervix,esophagusstomach,lung,skin	Multi-cancer
ERBB2_MAPK8IP1	biliarytract,bladder,bowel,breast,cervix,esophagusstomach,lung,skin	Multi-cancer
ERBB2_MAPK8IP2	biliarytract,bladder,bowel,breast,cervix,esophagusstomach,lung,skin	Multi-cancer
ERBB2_MLF1	biliarytract,bladder,bowel,breast,cervix,esophagusstomach,lung,skin	Multi-cancer
ERBB2_MLF2	biliarytract,bladder,bowel,breast,cervix,esophagusstomach,lung,skin	Multi-cancer
ERBB2_MTCH1	biliarytract,bladder,bowel,breast,cervix,esophagusstomach,lung,skin	Multi-cancer
ERBB2_MUCL1	biliarytract,bladder,bowel,breast,cervix,esophagusstomach,lung,skin	Multi-cancer
ERBB2_NAT2	biliarytract,bladder,bowel,breast,cervix,esophagusstomach,lung,skin	Multi-cancer
ERBB2_NCK2	biliarytract,bladder,bowel,breast,cervix,esophagusstomach,lung,skin	Multi-cancer
ERBB2_NUDC	biliarytract,bladder,bowel,breast,cervix,esophagusstomach,lung,skin	Multi-cancer
ERBB2_NUDCD3	bowel,breast,esophagusstomach	Multi-cancer
ERBB2_PHF23	biliarytract,bladder,bowel,breast,cervix,esophagusstomach,lung,skin	Multi-cancer
ERBB2_PIK3R1	biliarytract,bladder,bowel,breast,cervix,esophagusstomach,lung,skin	Multi-cancer
ERBB2_PIK3R2	biliarytract,bladder,bowel,breast,cervix,esophagusstomach,lung,skin	Multi-cancer
ERBB2_PIK3R3	biliarytract,bladder,bowel,breast,cervix,esophagusstomach,lung,skin	Multi-cancer
ERBB2_PLCG1	biliarytract,bladder,bowel,breast,cervix,esophagusstomach,lung,skin	Multi-cancer
ERBB2_PLCG2	biliarytract,bladder,bowel,breast,cervix,esophagusstomach,lung,skin	Multi-cancer
ERBB2_POLD2	biliarytract,bladder,bowel,breast,cervix,esophagusstomach,lung,skin	Multi-cancer
ERBB2_PPP5C	biliarytract,bladder,bowel,breast,cervix,esophagusstomach,lung,skin	Multi-cancer
ERBB2_PRDM14	biliarytract,bladder,bowel,breast,cervix,esophagusstomach,lung,skin	Multi-cancer
ERBB2_PSAP	biliarytract,bladder,bowel,breast,cervix,esophagusstomach,lung,skin	Multi-cancer
ERBB2_PSMC3IP	biliarytract,bladder,bowel,breast,cervix,esophagusstomach,lung,skin	Multi-cancer
ERBB2_PSMD2	biliarytract,bladder,bowel,breast,cervix,esophagusstomach,lung,skin	Multi-cancer
ERBB2_PTPN11	cnsbrain,esophagusstomach	Multi-cancer
ERBB2_PTPN3	biliarytract,bladder,bowel,breast,cervix,esophagusstomach,lung,skin	Multi-cancer
ERBB2_PTPRC	biliarytract,bladder,bowel,breast,cervix,esophagusstomach,lung,skin	Multi-cancer
ERBB2_PTPRG	biliarytract,bladder,bowel,breast,cervix,esophagusstomach,lung,skin	Multi-cancer
ERBB2_PTPRK	biliarytract,bladder,bowel,breast,cervix,esophagusstomach,lung,skin	Multi-cancer
ERBB2_PTPRO	biliarytract,bladder,bowel,breast,cervix,esophagusstomach,lung,skin	Multi-cancer
ERBB2_PTPRZ1	biliarytract,bladder,bowel,breast,cervix,esophagusstomach,lung,skin	Multi-cancer
ERBB2_Q53FC7	biliarytract,bladder,bowel,breast,cervix,esophagusstomach,lung,skin	Multi-cancer
ERBB2_Q96BE0	biliarytract,bladder,bowel,breast,cervix,esophagusstomach,lung,skin	Multi-cancer
ERBB2_RASA1	biliarytract,bladder,bowel,breast,cervix,esophagusstomach,lung,skin	Multi-cancer
ERBB2_RHOBTB2	biliarytract,bladder,bowel,breast,cervix,esophagusstomach,lung,skin	Multi-cancer
ERBB2_RIN1	biliarytract,bladder,bowel,breast,cervix,esophagusstomach,lung,skin	Multi-cancer
ERBB2_RIN2	biliarytract,bladder,bowel,breast,cervix,esophagusstomach,lung,skin	Multi-cancer
ERBB2_SH2B3	esophagusstomach	Single-cancer
ERBB2_SH2D1B	biliarytract,bladder,bowel,breast,cervix,esophagusstomach,lung,skin	Multi-cancer
ERBB2_SH2D2A	biliarytract,bladder,bowel,breast,cervix,esophagusstomach,lung,skin	Multi-cancer
ERBB2_SH2D3A	biliarytract,bladder,bowel,breast,cervix,esophagusstomach,lung,skin	Multi-cancer
ERBB2_SH2D5	biliarytract,bladder,bowel,breast,cervix,esophagusstomach,lung,skin	Multi-cancer
ERBB2_SH3BP2	biliarytract,bladder,bowel,breast,cervix,esophagusstomach,lung,skin	Multi-cancer
ERBB2_SHC1	biliarytract,bladder,bowel,breast,cervix,esophagusstomach,lung,skin	Multi-cancer
ERBB2_SHC2	biliarytract,bladder,bowel,breast,cervix,esophagusstomach,lung,skin	Multi-cancer
ERBB2_SHC3	biliarytract,bladder,bowel,breast,cervix,esophagusstomach,lung,skin	Multi-cancer
ERBB2_SLA	biliarytract,bladder,bowel,breast,cervix,esophagusstomach,lung,skin	Multi-cancer
ERBB2_SLA2	biliarytract,bladder,bowel,breast,cervix,esophagusstomach,lung,skin	Multi-cancer
ERBB2_SOCS1	biliarytract,bladder,bowel,breast,cervix,esophagusstomach,lung,skin	Multi-cancer
ERBB2_STAT1	biliarytract,bladder,bowel,breast,cervix,esophagusstomach,lung,skin	Multi-cancer
ERBB2_STAT3	biliarytract,bladder,bowel,breast,cervix,esophagusstomach,lung,skin	Multi-cancer
ERBB2_STIP1	biliarytract,bladder,bowel,breast,cervix,esophagusstomach,lung,skin	Multi-cancer
ERBB2_STK24	biliarytract,bladder,bowel,breast,cervix,esophagusstomach,lung,skin	Multi-cancer
ERBB2_STUB1	biliarytract,bladder,bowel,breast,cervix,esophagusstomach,lung,skin	Multi-cancer
ERBB2_SUPT6H	biliarytract,bladder,bowel,breast,cervix,esophagusstomach,lung,skin	Multi-cancer
ERBB2_TCEAL2	biliarytract,bladder,bowel,breast,cervix,esophagusstomach,lung,skin	Multi-cancer
ERBB2_TEC	breast	Single-cancer
ERBB2_THRSP	bowel,breast,esophagusstomach	Multi-cancer
ERBB2_TLN1	biliarytract,bladder,bowel,breast,cervix,esophagusstomach,lung,skin	Multi-cancer
ERBB2_TNS2	biliarytract,bladder,bowel,breast,cervix,esophagusstomach,lung,skin	Multi-cancer
ERBB2_TNS3	biliarytract,bladder,bowel,breast,cervix,esophagusstomach,lung,skin	Multi-cancer
ERBB2_TTC9B	biliarytract,bladder,bowel,breast,cervix,esophagusstomach,lung,skin	Multi-cancer
ERBB2_TXK	breast	Single-cancer
ERBB2_UNC45B	biliarytract,bladder,bowel,breast,cervix,esophagusstomach,lung,skin	Multi-cancer
ERBB2_UTP18	biliarytract,bladder,bowel,breast,cervix,esophagusstomach,lung,skin	Multi-cancer
ERBB2_VAV1	biliarytract,bladder,bowel,breast,cervix,esophagusstomach,lung,skin	Multi-cancer
ERBB2_VAV2	biliarytract,bladder,bowel,breast,cervix,esophagusstomach,lung,skin	Multi-cancer
ERBB2_VAV3	biliarytract,bladder,bowel,breast,cervix,esophagusstomach,lung,skin	Multi-cancer
ERBB2IP_SMAD3	bowel	Single-cancer
ERBB3_ERBB3	bladder,breast	Multi-cancer
ERBB3_FLYWCH1	bladder,breast	Multi-cancer
ERBB3_GRB7	bladder,breast	Multi-cancer
ERBB3_HSP90AB1	bladder,breast	Multi-cancer
ERBB3_NCK1	bladder,breast	Multi-cancer
ERBB3_NCK2	bladder,breast	Multi-cancer
ERBB3_NRG1	bladder	Single-cancer
ERBB3_ODF2L	bladder,breast	Multi-cancer
ERBB3_PA2G4	bladder,breast	Multi-cancer
ERBB3_PIK3R1	bladder,breast	Multi-cancer
ERBB3_PIK3R2	bladder,breast	Multi-cancer
ERBB3_PIK3R3	bladder,breast	Multi-cancer
ERBB3_PLCG1	bladder,breast	Multi-cancer
ERBB3_RASA1	bladder,breast	Multi-cancer
ERBB3_RASA4	bladder,breast	Multi-cancer
ERBB3_RIN1	bladder,breast	Multi-cancer
ERBB3_SH2B3	bladder,breast	Multi-cancer
ERBB3_SH2D1A	bladder,breast	Multi-cancer
ERBB3_SHC1	bladder,breast	Multi-cancer
ERBB3_SHC3	bladder,breast	Multi-cancer
ERBB3_SRC	bladder,breast	Multi-cancer
ERBB3_SYK	breast	Single-cancer
ERBB3_TNS2	bladder,breast	Multi-cancer
ERBB3_TNS3	bladder,breast	Multi-cancer
ERBB3_TNS4	bladder,breast	Multi-cancer
ERBB3_VAV1	bladder,breast	Multi-cancer
ERBB3_VAV2	bladder,breast	Multi-cancer
ERBB3_VAV3	bladder,breast	Multi-cancer
ERBB4_HSP90AB1	bladder	Single-cancer
ERBB4_ITCH	bladder	Single-cancer
ERBB4_NEDD4	bladder	Single-cancer
ERBB4_RASA1	bladder	Single-cancer
ERBB4_SHC1	bladder	Single-cancer
ERBB4_SYK	bladder,esophagusstomach	Multi-cancer
ERCC2_ERCC3	bladder	Single-cancer
ERCC2_GTF2H1	bladder	Single-cancer
ERCC2_GTF2H2	bladder	Single-cancer
ERCC2_GTF2H2C	bladder	Single-cancer
ERCC2_GTF2H3	bladder	Single-cancer
ERCC2_HSF2	bladder	Single-cancer
ERCC2_HSP90AB1	bladder	Single-cancer
ERCC2_PPP5C	bladder	Single-cancer
ERCC2_STIP1	bladder	Single-cancer
ERH_TP53	bladder,bowel,breast,cnsbrain,esophagusstomach,headandneck,lung,lymph,ovaryfallopiantube,pancreas,prostate,skin,softtissue,uterus	Multi-cancer
ERLEC1_STK11	lung	Single-cancer
ERRFI1_FGFR2	uterus	Single-cancer
ESR1_ESR1	breast,uterus	Multi-cancer
ESR1_FN1	breast	Single-cancer
ESR1_FOXO1	breast,lymph,uterus	Multi-cancer
ESR1_GLCE	breast,uterus	Multi-cancer
ESR1_HBP1	breast,uterus	Multi-cancer
ESR1_HSP90AA1	breast,uterus	Multi-cancer
ESR1_HSP90AB1	breast,uterus	Multi-cancer
ESR1_KAT5	breast,uterus	Multi-cancer
ESR1_KIF1A	breast,uterus	Multi-cancer
ESR1_KLK5	breast	Single-cancer
ESR1_MAPK1	breast,uterus	Multi-cancer
ESR1_MED1	breast,uterus	Multi-cancer
ESR1_MTCH2	breast,uterus	Multi-cancer
ESR1_MYL6	breast	Single-cancer
ESR1_NCOA1	breast	Single-cancer
ESR1_NCOA2	breast	Single-cancer
ESR1_NCOA3	breast,uterus	Multi-cancer
ESR1_NCOA6	breast,uterus	Multi-cancer
ESR1_NPPA	breast	Single-cancer
ESR1_NRIP1	breast,uterus	Multi-cancer
ESR1_PAK1	breast,uterus	Multi-cancer
ESR1_PGR	breast,skin,uterus	Multi-cancer
ESR1_PHB2	breast	Single-cancer
ESR1_PIAS1	breast,uterus	Multi-cancer
ESR1_PIK3R1	breast,uterus	Multi-cancer
ESR1_PNRC2	breast	Single-cancer
ESR1_PRMT2	breast,uterus	Multi-cancer
ESR1_PSMC3IP	breast,uterus	Multi-cancer
ESR1_PSMC5	breast,uterus	Multi-cancer
ESR1_RBM39	breast	Single-cancer
ESR1_SERPINB5	breast	Single-cancer
ESR1_SMAD4	bowel,breast,esophagusstomach,pancreas,uterus	Multi-cancer
ESR1_SMARCA4	breast,uterus	Multi-cancer
ESR1_SRC	breast,uterus	Multi-cancer
ESR1_TRAM1	breast,uterus	Multi-cancer
ESR1_UBE4B	breast,uterus	Multi-cancer
ESR1_WHSC1L1	breast,uterus	Multi-cancer
ETF1_KEAP1	lung	Single-cancer
ETS1_PAX5	bowel,esophagusstomach	Multi-cancer
EWSR1_EZH2	lymph	Single-cancer
EWSR1_SMAD4	bowel,esophagusstomach,pancreas	Multi-cancer
EZH2_GTF3C1	lymph	Single-cancer
EZH2_HDAC1	lymph	Single-cancer
EZH2_KDM1A	lymph	Single-cancer
EZH2_KLHDC2	lymph	Single-cancer
EZH2_MAP3K7	lymph	Single-cancer
EZH2_MAPK8IP2	lymph	Single-cancer
EZH2_MAPKAPK3	lymph	Single-cancer
EZH2_NINL	lymph	Single-cancer
EZH2_POLA2	lymph	Single-cancer
EZH2_PRMT5	lymph	Single-cancer
EZH2_Q59GK3	lymph	Single-cancer
EZH2_RASA1	lymph	Single-cancer
EZH2_RIN3	lymph	Single-cancer
EZH2_RPN2	lymph	Single-cancer
EZH2_RPS6KA5	lymph	Single-cancer
EZH2_SIRT1	lymph	Single-cancer
EZH2_SMN1	lymph	Single-cancer
EZH2_SMS	lymph	Single-cancer
EZH2_SUV39H1	lymph	Single-cancer
EZH2_SUZ12	lymph	Single-cancer
EZH2_TAF1D	lymph	Single-cancer
EZH2_TK1	lymph	Single-cancer
EZH2_TNFSF11	lymph	Single-cancer
EZH2_VAV1	lymph	Single-cancer
EZH2_WDR61	lymph	Single-cancer
EZH2_WSB2	lymph	Single-cancer
EZH2_ZAK	lymph	Single-cancer
FADD_SPOP	prostate,uterus	Multi-cancer
FAM101A_FBXW7	bowel	Single-cancer
FAM117B_KEAP1	lung	Single-cancer
FAM161B_SMAD2	bowel	Single-cancer
FAM173A_TP53	bladder,breast,cnsbrain,headandneck,lung	Multi-cancer
FAM46A_KEAP1	lung	Single-cancer
FAM65B_RHOA	bowel,esophagusstomach,headandneck	Multi-cancer
FBLN1_SMAD3	bowel	Single-cancer
FBLN1_SMAD4	bowel,esophagusstomach,pancreas	Multi-cancer
FBN2_SMAD2	bowel	Single-cancer
FBXO3_SMAD2	bowel	Single-cancer
FBXO3_SMAD3	bowel	Single-cancer
FBXO30_SMAD4	bowel,esophagusstomach,pancreas	Multi-cancer
FBXO34_SMAD4	bowel,esophagusstomach,pancreas	Multi-cancer
FBXW7_FBXW7	bowel,uterus	Multi-cancer
FBXW7_HSP90AB1	bowel,uterus	Multi-cancer
FBXW7_IL24	bladder,bowel,cervix,esophagusstomach,headandneck,lung,uterus	Multi-cancer
FBXW7_JUN	bowel	Single-cancer
FBXW7_LINGO1	bowel,uterus	Multi-cancer
FBXW7_MMS22L	bowel	Single-cancer
FBXW7_MYC	bowel	Single-cancer
FBXW7_NOTCH1	bowel	Single-cancer
FBXW7_NUDCD2	bladder,bowel,cervix,esophagusstomach,headandneck,lung,uterus	Multi-cancer
FBXW7_SCGB3A1	bowel	Single-cancer
FBXW7_SHPRH	bowel	Single-cancer
FBXW7_SKP1	bowel	Single-cancer
FBXW7_SUMF2	bowel,uterus	Multi-cancer
FBXW7_TRIM25	bowel	Single-cancer
FBXW7_WDR97	bowel	Single-cancer
FCAMR_TP53	bladder,bowel,breast,cnsbrain,esophagusstomach,headandneck,lung,lymph,ovaryfallopiantube,pancreas,prostate,skin,softtissue,uterus	Multi-cancer
FES_KIT	skin,softtissue	Multi-cancer
FGF1_FGFR2	uterus	Single-cancer
FGF1_FGFR3	bladder,headandneck,lung	Multi-cancer
FGF10_FGFR2	uterus	Single-cancer
FGF23_FGFR1	cnsbrain	Single-cancer
FGF8_FGFR2	uterus	Single-cancer
FGFR1_FGFR1	cnsbrain	Single-cancer
FGFR1_HSP90AB1	cnsbrain	Single-cancer
FGFR1_NEDD4	cnsbrain	Single-cancer
FGFR1_PIK3R1	cnsbrain	Single-cancer
FGFR2_FGFR2	uterus	Single-cancer
FGFR2_GLCE	uterus	Single-cancer
FGFR2_GRB2	uterus	Single-cancer
FGFR2_HOXC6	uterus	Single-cancer
FGFR2_MTA3	uterus	Single-cancer
FGFR2_NEDD4	uterus	Single-cancer
FGFR2_PPM1A	uterus	Single-cancer
FGFR2_Q16089	uterus	Single-cancer
FGFR2_RHOBTB2	uterus	Single-cancer
FGFR2_TFF1	uterus	Single-cancer
FGFR3_FGFR3	bladder,headandneck	Multi-cancer
FGFR3_FLJ10324	bladder	Single-cancer
FGFR3_G4	bladder	Single-cancer
FGFR3_GPSM3	bladder	Single-cancer
FGFR3_GTF3C1	bladder	Single-cancer
FGFR3_GUSBP1	bladder	Single-cancer
FGFR3_HBZ	bladder	Single-cancer
FGFR3_HNRNPL	bladder	Single-cancer
FGFR3_HSP90AB1	bladder	Single-cancer
FGFR3_KRT8	bladder	Single-cancer
FGFR3_NDUFS6	bladder	Single-cancer
FGFR3_POLA2	bladder	Single-cancer
FGFR3_Q7L4M3	bladder	Single-cancer
FGFR3_RADIL	bladder	Single-cancer
FGFR3_RNF130	bladder	Single-cancer
FGFR3_RPL8	bladder	Single-cancer
FGFR3_SLC25A6	bladder	Single-cancer
FGFR3_SMG7	bladder	Single-cancer
FGR_KIT	skin,softtissue	Multi-cancer
FGR_STAT3	liver	Single-cancer
FH_FH	liver	Single-cancer
FKBP5_STK11	lung	Single-cancer
FKBPL_KEAP1	lung	Single-cancer
FLJ00380_KEAP1	lung	Single-cancer
FLJ23584_SMAD2	bowel	Single-cancer
FLNA_SMAD3	bowel	Single-cancer
FLNA_VHL	kidney	Single-cancer
FN1_SMAD4	bowel,esophagusstomach,pancreas	Multi-cancer
FOXA1_Q59EF7	breast,prostate	Multi-cancer
FOXA1_SEZ6L2	breast,prostate	Multi-cancer
FOXA1_TLE1	breast,prostate	Multi-cancer
FOXH1_SMAD2	bowel	Single-cancer
FOXH1_SMAD3	bowel	Single-cancer
FOXO1_PIK3R3	lymph	Single-cancer
FOXO1_Q9UBT1	lymph	Single-cancer
FOXO1_SIRT1	lymph	Single-cancer
FOXO1_TNS2	lymph	Single-cancer
FOXO3_SMAD4	bowel,esophagusstomach,pancreas	Multi-cancer
FOXO3_TP53	bladder,bowel,breast,cnsbrain,esophagusstomach,headandneck,lung,lymph,ovaryfallopiantube,pancreas,prostate,skin,softtissue,uterus	Multi-cancer
FOXP1_IL3RA	bladder	Single-cancer
FOXP1_MNAT1	bladder	Single-cancer
FXYD6_TP53	bladder,bowel,breast,cnsbrain,esophagusstomach,headandneck,lung,lymph,ovaryfallopiantube,pancreas,prostate,skin,softtissue,uterus	Multi-cancer
GAB1_MET	kidney	Single-cancer
GADD45A_TP53	bladder,bowel,breast,cnsbrain,esophagusstomach,headandneck,lung,lymph,ovaryfallopiantube,pancreas,prostate,skin,softtissue,uterus	Multi-cancer
GADD45GIP1_STAT3	liver	Single-cancer
GATA2_SMAD4	bowel,esophagusstomach,pancreas	Multi-cancer
GATA3_PSMA3	breast	Single-cancer
GATA3_RARB	breast	Single-cancer
GATAD2B_SMAD2	bowel	Single-cancer
GCC1_GLI1	bowel	Single-cancer
GCC1_GTF2I	thymus	Single-cancer
GCC1_SPOP	prostate	Single-cancer
GFER_SMAD2	bowel	Single-cancer
GGA1_SMAD3	bowel	Single-cancer
GIT1_PDPK1	skin	Single-cancer
GIT2_SMAD3	bowel	Single-cancer
GIT2_SPOP	prostate	Single-cancer
GK_RXRA	bladder	Single-cancer
GLI1_PRKAA2	bowel	Single-cancer
GLI1_RAI1	bowel	Single-cancer
GLI1_TRIM42	bowel	Single-cancer
GLI1_XBP1	bowel	Single-cancer
GLI3_SPOP	prostate	Single-cancer
GLRX5_KEAP1	lung	Single-cancer
GNAQ_PLCB1	eye,skin	Multi-cancer
GNPDA1_STK11	lung	Single-cancer
GPERIK_KEAP1	lung	Single-cancer
GPNMB_SMAD4	bowel,esophagusstomach,pancreas	Multi-cancer
GPX2_TP53	bladder,bowel,breast,cnsbrain,esophagusstomach,headandneck,lung,lymph,ovaryfallopiantube,pancreas,prostate,skin,softtissue,uterus	Multi-cancer
GRB2_MET	kidney	Single-cancer
GRB2_PIK3R1	cnsbrain	Single-cancer
GRB2_PTPN11	blood,cnsbrain	Multi-cancer
GREB1_HRAS	adrenalgland,bladder,headandneck,lung,prostate,skin,softtissue,thymus,thyroid	Multi-cancer
GREB1_SMAD4	bowel,esophagusstomach,pancreas	Multi-cancer
GRIP1_SMAD2	bowel	Single-cancer
GRN_RAC1	testis	Single-cancer
GSK3B_RXRA	bladder	Single-cancer
GSK3B_TP53	bladder,bowel,breast,cnsbrain,esophagusstomach,headandneck,lung,lymph,ovaryfallopiantube,pancreas,prostate,skin,softtissue,uterus	Multi-cancer
GSTM4_TP53	bladder,bowel,breast,cnsbrain,esophagusstomach,headandneck,lung,lymph,ovaryfallopiantube,pancreas,prostate,skin,softtissue,uterus	Multi-cancer
GTF2I_GTF2I	thymus	Single-cancer
GTF2I_LSM8	thymus	Single-cancer
GTF2I_MAP3K3	thymus	Single-cancer
GTF2I_MAPK12	thymus	Single-cancer
GTF2I_MTUS2	thymus	Single-cancer
GTF2I_PIAS2	thymus	Single-cancer
GTF2I_Q96EL6	thymus	Single-cancer
GTF2I_SRF	thymus	Single-cancer
GTF2I_TAB2	thymus	Single-cancer
GTF2I_TRAF6	thymus	Single-cancer
GTF2I_ZMYM3	thymus	Single-cancer
GUSBP1_TP53	bladder,blood,bowel,breast,cnsbrain,esophagusstomach,headandneck,kidney,lung,lymph,ovaryfallopiantube,pancreas,prostate,skin,softtissue,uterus	Multi-cancer
GYPA_KEAP1	lung	Single-cancer
H2AFY_SPOP	prostate,uterus	Multi-cancer
HACE1_RAC1	testis	Single-cancer
HBA1_PTEN	uterus	Single-cancer
HDAC1_STAT3	liver	Single-cancer
HDAC1_TP53	bladder,bowel,breast,cnsbrain,esophagusstomach,headandneck,lung,lymph,ovaryfallopiantube,pancreas,prostate,skin,softtissue,uterus	Multi-cancer
HDLBP_SMAD4	bowel,esophagusstomach,pancreas	Multi-cancer
HEL-S-1_RAF1	bowel,lung	Multi-cancer
HEL-S-303_STAT3	liver	Single-cancer
HEL-S-45_SMAD2	bowel	Single-cancer
HEL-S-47E_RAC1	testis	Single-cancer
HEL-S-72_KRAS	biliarytract,bladder,blood,bowel,esophagusstomach,lung,pancreas,prostate,testis,thyroid,uterus	Multi-cancer
HEL-S-91N_SMAD2	bowel	Single-cancer
HEL117_STK11	lung	Single-cancer
HEL25_TCEB1	kidney	Single-cancer
HIF1A_TP53	bladder,bowel,breast,cnsbrain,esophagusstomach,headandneck,lung,lymph,ovaryfallopiantube,pancreas,prostate,skin,softtissue,uterus	Multi-cancer
HINFP_TP53	bladder,bowel,breast,cnsbrain,esophagusstomach,headandneck,lung,lymph,ovaryfallopiantube,pancreas,prostate,skin,softtissue,uterus	Multi-cancer
HIPK2_TP53	bladder,bowel,breast,cnsbrain,esophagusstomach,headandneck,lung,lymph,ovaryfallopiantube,pancreas,prostate,skin,softtissue,uterus	Multi-cancer
HIST1H3A_HTT	lung	Single-cancer
HIST1H3A_IPO4	lung	Single-cancer
HIST1H3A_KAT2A	lung	Single-cancer
HIST1H3A_KAT2B	lung	Single-cancer
HIST1H3A_NASP	lung	Single-cancer
HIST1H3A_SETD1A	lung	Single-cancer
HIST1H3A_SETD1B	lung	Single-cancer
HIST1H3A_SETD2	lung	Single-cancer
HIST1H3A_SETDB1	lung	Single-cancer
HIST1H3A_SUPT16H	lung	Single-cancer
HIST1H3A_TP53BP1	lung	Single-cancer
HIST1H3A_TRIM24	cnsbrain	Single-cancer
HIST1H3A_YEATS2	lung	Single-cancer
HIVEP1_SMAD3	bowel	Single-cancer
HLA-A_STAT3	liver	Single-cancer
HMG20A_SMAD4	bowel,esophagusstomach,pancreas	Multi-cancer
HNF1A_HNF1A	lymph	Single-cancer
HOXB13_IRF4	lymph	Single-cancer
HPS4_RAC1	testis	Single-cancer
HRAS_HRAS	adrenalgland,bladder,headandneck,lung,prostate,skin,softtissue,thymus,thyroid	Multi-cancer
HRAS_IL24	adrenalgland,bladder,headandneck,lung,prostate,skin,softtissue,thyroid	Multi-cancer
HRAS_KRT18	adrenalgland,bladder,headandneck,lung,prostate,skin,softtissue,thyroid	Multi-cancer
HRAS_MLLT4	adrenalgland,bladder,headandneck,lung,prostate,skin,softtissue,thymus,thyroid	Multi-cancer
HRAS_PDE6D	adrenalgland,bladder,headandneck,lung,prostate,skin,softtissue,thyroid	Multi-cancer
HRAS_PIK3CA	adrenalgland,bladder,headandneck,lung,prostate,skin,softtissue,thymus,thyroid	Multi-cancer
HRAS_PIK3CD	adrenalgland,bladder,headandneck,lung,prostate,skin,softtissue,thymus,thyroid	Multi-cancer
HRAS_PIK3CG	adrenalgland,bladder,headandneck,lung,prostate,skin,softtissue,thymus,thyroid	Multi-cancer
HRAS_Q59GK3	adrenalgland,bladder,headandneck,lung,prostate,skin,softtissue,thymus,thyroid	Multi-cancer
HRAS_RASA1	adrenalgland,bladder,headandneck,lung,prostate,skin,softtissue,thymus,thyroid	Multi-cancer
HRAS_RIN1	adrenalgland,bladder,headandneck,lung,prostate,skin,softtissue,thymus,thyroid	Multi-cancer
HRAS_SHOC2	adrenalgland,bladder,headandneck,lung,prostate,skin,softtissue,thyroid	Multi-cancer
HRAS_SOS1	adrenalgland,bladder,headandneck,lung,prostate,skin,softtissue,thymus,thyroid	Multi-cancer
HRAS_SOS2	adrenalgland,bladder,headandneck,lung,prostate,skin,softtissue,thymus,thyroid	Multi-cancer
HSH2D_MET	kidney	Single-cancer
HSP90AB1_MAX	blood,bowel,cnsbrain,uterus	Multi-cancer
HSP90AB1_PRKCI	bowel	Single-cancer
HSP90AB1_TP53	bladder,blood,bowel,breast,cnsbrain,esophagusstomach,headandneck,kidney,lung,lymph,ovaryfallopiantube,pancreas,prostate,skin,softtissue,uterus	Multi-cancer
HSPA8_TP53	bladder,blood,bowel,breast,cnsbrain,esophagusstomach,headandneck,kidney,lung,lymph,ovaryfallopiantube,pancreas,prostate,skin,softtissue,uterus	Multi-cancer
HSPA9_TP53	bladder,blood,bowel,breast,cnsbrain,esophagusstomach,headandneck,kidney,lung,lymph,ovaryfallopiantube,pancreas,prostate,skin,softtissue,uterus	Multi-cancer
HSPA9_XPO1	blood,breast,lymph	Multi-cancer
HSPB1_TP53	bladder,bowel,breast,cnsbrain,esophagusstomach,headandneck,lung,lymph,ovaryfallopiantube,pancreas,prostate,skin,softtissue,uterus	Multi-cancer
HTT_TP53	bladder,bowel,breast,cnsbrain,esophagusstomach,headandneck,lung,lymph,ovaryfallopiantube,pancreas,prostate,skin,softtissue,uterus	Multi-cancer
HUWE1_SMAD2	bowel	Single-cancer
ID1_MYOD1	softtissue	Single-cancer
ID2_MYOD1	softtissue	Single-cancer
ID3_MYOD1	softtissue	Single-cancer
IDH1_IDH1	biliarytract,blood,bone,bowel,cnsbrain,liver,lung,prostate,skin	Multi-cancer
IFI16_TP53	bladder,bowel,breast,cnsbrain,esophagusstomach,headandneck,lung,lymph,ovaryfallopiantube,pancreas,prostate,skin,softtissue,uterus	Multi-cancer
IGBP1_PPP6C	skin	Single-cancer
IGSF21_KRAS	biliarytract,bladder,blood,bowel,esophagusstomach,lung,pancreas,prostate,testis,thyroid,uterus	Multi-cancer
IKBKB_KEAP1	lung	Single-cancer
IKBKB_TP53	bladder,blood,bowel,breast,cnsbrain,esophagusstomach,headandneck,kidney,lung,lymph,ovaryfallopiantube,pancreas,prostate,skin,softtissue,uterus	Multi-cancer
IKZF3_PIK3R1	cnsbrain	Single-cancer
IKZF3_RHOA	bowel,esophagusstomach,headandneck	Multi-cancer
IL1RAP_PRKCI	bowel	Single-cancer
IL24_KRAS	biliarytract,bladder,blood,bowel,esophagusstomach,lung,pancreas,prostate,testis,thyroid,uterus	Multi-cancer
IL24_PTEN	uterus	Single-cancer
ILKAP_SMAD4	bowel,esophagusstomach,pancreas	Multi-cancer
INPPL1_MET	kidney	Single-cancer
IQGAP1_RAC1	testis	Single-cancer
IRAK2_SMAD2	bowel	Single-cancer
IRF4_PROX1	lymph	Single-cancer
IRF4_SPI1	lymph	Single-cancer
IRF4_TRAF2	lymph	Single-cancer
ITK_MET	kidney	Single-cancer
ITK_SMAD4	bowel,esophagusstomach,pancreas	Multi-cancer
JADE1_VHL	kidney	Single-cancer
JDP2_PGR	skin	Single-cancer
JTB_TCEB1	kidney	Single-cancer
JUN_NFE2L2	esophagusstomach,headandneck,lung	Multi-cancer
JUNB_SMAD4	bowel,esophagusstomach,pancreas	Multi-cancer
KANSL1_SMAD3	bowel	Single-cancer
KAT2B_MYOD1	softtissue	Single-cancer
KAT2B_TP53	bladder,bowel,breast,cnsbrain,esophagusstomach,headandneck,lung,lymph,ovaryfallopiantube,pancreas,prostate,skin,softtissue,uterus	Multi-cancer
KAT5_TP53	bladder,blood,bowel,breast,cnsbrain,esophagusstomach,headandneck,kidney,lung,lymph,ovaryfallopiantube,pancreas,prostate,skin,softtissue,uterus	Multi-cancer
KDM1A_TP53	bladder,blood,bowel,breast,cnsbrain,esophagusstomach,headandneck,kidney,lung,lymph,ovaryfallopiantube,pancreas,prostate,skin,softtissue,uterus	Multi-cancer
KDM2A_SMAD3	bowel	Single-cancer
KEAP1_KEAP1	lung	Single-cancer
KEAP1_LSM3	lung	Single-cancer
KEAP1_MAD2L1	lung	Single-cancer
KEAP1_MAPKBP1	lung	Single-cancer
KEAP1_NFE2L1	lung	Single-cancer
KEAP1_NFE2L2	esophagusstomach,headandneck,kidney,liver,lung,uterus	Multi-cancer
KEAP1_NUDT4	lung	Single-cancer
KEAP1_OXR1	lung	Single-cancer
KEAP1_PDCD6IP	lung	Single-cancer
KEAP1_PIDD1	lung	Single-cancer
KEAP1_PRKAG1	lung	Single-cancer
KEAP1_PTMA	lung	Single-cancer
KEAP1_PTMAP7	lung	Single-cancer
KEAP1_Q14419	lung	Single-cancer
KEAP1_RECK	lung	Single-cancer
KEAP1_RELA	lung	Single-cancer
KEAP1_SNRPN	lung	Single-cancer
KEAP1_SQSTM1	lung	Single-cancer
KEAP1_TERF1	lung	Single-cancer
KEAP1_TSC22D4	lung	Single-cancer
KEAP1_WDR83	lung	Single-cancer
KEAP1_ZSCAN32	lung	Single-cancer
KHDRBS1_SMAD2	bowel	Single-cancer
KIAA0087_TP53	bladder,bowel,breast,cnsbrain,esophagusstomach,headandneck,lung,lymph,ovaryfallopiantube,pancreas,prostate,skin,softtissue,uterus	Multi-cancer
KIAA1033_SMAD2	bowel	Single-cancer
KIF1A_RXRA	bladder	Single-cancer
KIT_KIT	skin,softtissue	Multi-cancer
KIT_LCK	skin,softtissue	Multi-cancer
KIT_SH2B3	blood,softtissue,testis	Multi-cancer
KIT_SRC	skin,softtissue	Multi-cancer
KIT_TEC	skin,softtissue	Multi-cancer
KIT_TXK	skin,softtissue	Multi-cancer
KIT_YES1	skin,softtissue	Multi-cancer
KMT2B_SMAD3	bowel	Single-cancer
KPNA3_MYOD1	softtissue	Single-cancer
KPNA3_NFE2L2	esophagusstomach,headandneck,lung	Multi-cancer
KPNA4_RAC1	testis	Single-cancer
KPNA6_RAC1	testis	Single-cancer
KPNB1_SMAD2	bowel	Single-cancer
KRAS_KRAS	biliarytract,bladder,blood,bowel,esophagusstomach,lung,pancreas,prostate,testis,thyroid,uterus	Multi-cancer
KRAS_LPAR1	biliarytract,bladder,blood,bowel,esophagusstomach,lung,pancreas,prostate,testis,thyroid,uterus	Multi-cancer
KRAS_MDFI	biliarytract,bladder,blood,bowel,esophagusstomach,lung,pancreas,prostate,testis,thyroid,uterus	Multi-cancer
KRAS_MOCS2	biliarytract,bladder,blood,bowel,esophagusstomach,lung,pancreas,prostate,testis,thyroid,uterus	Multi-cancer
KRAS_MT-CO3	biliarytract,bladder,blood,bowel,esophagusstomach,lung,pancreas,prostate,testis,thyroid,uterus	Multi-cancer
KRAS_MT-CYB	biliarytract,bladder,blood,bowel,esophagusstomach,lung,pancreas,prostate,testis,thyroid,uterus	Multi-cancer
KRAS_OSGIN1	biliarytract,bladder,blood,bowel,esophagusstomach,lung,pancreas,prostate,testis,thyroid,uterus	Multi-cancer
KRAS_PDE4DIP	biliarytract,bladder,blood,bowel,esophagusstomach,lung,pancreas,prostate,testis,thyroid,uterus	Multi-cancer
KRAS_PIK3R2	biliarytract,bladder,blood,bowel,esophagusstomach,lung,pancreas,prostate,testis,thyroid,uterus	Multi-cancer
KRAS_PSMA3	biliarytract,bladder,blood,bowel,esophagusstomach,lung,pancreas,prostate,testis,thyroid,uterus	Multi-cancer
KRAS_QDPR	biliarytract,bladder,blood,bowel,esophagusstomach,lung,pancreas,prostate,testis,thyroid,uterus	Multi-cancer
KRAS_RBPMS	biliarytract,bladder,blood,bowel,esophagusstomach,lung,pancreas,prostate,testis,thyroid,uterus	Multi-cancer
KRAS_SERPINB5	biliarytract,bladder,blood,bowel,esophagusstomach,lung,pancreas,prostate,testis,thyroid,uterus	Multi-cancer
KRAS_SHOC2	biliarytract,bladder,blood,bowel,esophagusstomach,lung,pancreas,prostate,testis,thyroid,uterus	Multi-cancer
KRAS_THRSP	biliarytract,bladder,blood,bowel,esophagusstomach,lung,pancreas,prostate,testis,thyroid,uterus	Multi-cancer
KRAS_TNFSF13	biliarytract,bladder,blood,bowel,esophagusstomach,lung,pancreas,prostate,testis,thyroid,uterus	Multi-cancer
KRAS_UQCRC1	biliarytract,bladder,blood,bowel,esophagusstomach,lung,pancreas,prostate,testis,thyroid,uterus	Multi-cancer
KRAS_ZDHHC17	biliarytract,bladder,blood,bowel,esophagusstomach,lung,pancreas,prostate,testis,thyroid,uterus	Multi-cancer
KRT40_RAC1	testis	Single-cancer
KTN1_RHOA	bowel,esophagusstomach,headandneck	Multi-cancer
LAMA4_TP53	bladder,bowel,breast,cnsbrain,esophagusstomach,headandneck,lung,lymph,ovaryfallopiantube,pancreas,prostate,skin,softtissue,uterus	Multi-cancer
LAMA5_SMAD2	bowel	Single-cancer
LATS1_RAC1	testis	Single-cancer
LBP_SMAD3	bowel	Single-cancer
LCK_MET	kidney	Single-cancer
LCK_STAT3	liver	Single-cancer
LHX9_SMAD2	bowel	Single-cancer
LITAF_SMAD2	bowel	Single-cancer
LMO2_SMAD2	bowel	Single-cancer
LTBP3_RAC1	testis	Single-cancer
LTBP4_RAC1	testis	Single-cancer
LUC7L2_PDPK1	skin	Single-cancer
LYPD3_SMAD4	bowel,esophagusstomach,pancreas	Multi-cancer
LZTS2_RAC1	testis	Single-cancer
MAD1L1_MAX	blood,bowel,cnsbrain	Multi-cancer
MAD2L1BP_TP53	bladder,bowel,breast,cnsbrain,esophagusstomach,headandneck,lung,lymph,ovaryfallopiantube,pancreas,prostate,skin,softtissue,uterus	Multi-cancer
MAFG_NFE2L2	esophagusstomach,headandneck,lung	Multi-cancer
MAFK_NFE2L2	esophagusstomach,headandneck,lung	Multi-cancer
MAGEA2_TP53	bladder,blood,bowel,breast,cnsbrain,esophagusstomach,headandneck,kidney,lung,lymph,ovaryfallopiantube,pancreas,prostate,skin,softtissue,uterus	Multi-cancer
MAGEB18_TP53	bladder,blood,bowel,breast,cnsbrain,esophagusstomach,headandneck,kidney,lung,lymph,ovaryfallopiantube,pancreas,prostate,skin,softtissue,uterus	Multi-cancer
MAGI1_RAC1	testis	Single-cancer
MAP2K3_SMAD2	bowel	Single-cancer
MAP2K3_SMAD4	bowel,esophagusstomach,pancreas	Multi-cancer
MAPK1_STAT3	liver	Single-cancer
MAPK1_TP53	bladder,blood,bowel,breast,cnsbrain,esophagusstomach,headandneck,kidney,lung,lymph,ovaryfallopiantube,pancreas,prostate,skin,softtissue,uterus	Multi-cancer
MAPK13_SMAD4	bowel,esophagusstomach,pancreas	Multi-cancer
MAPK8_TP53	bladder,bowel,breast,cnsbrain,esophagusstomach,headandneck,lung,lymph,ovaryfallopiantube,pancreas,prostate,skin,softtissue,uterus	Multi-cancer
MAPK9_TP53	bladder,bowel,breast,cnsbrain,esophagusstomach,headandneck,lung,lymph,ovaryfallopiantube,pancreas,prostate,skin,softtissue,uterus	Multi-cancer
MAPKAPK2_STAT3	liver	Single-cancer
MAX_MAX	bowel,cnsbrain	Multi-cancer
MAX_MGA	bowel,cnsbrain	Multi-cancer
MAX_MXD1	bowel,cnsbrain	Multi-cancer
MAX_MXD3	bowel,cnsbrain	Multi-cancer
MAX_MXD4	bowel,cnsbrain	Multi-cancer
MAX_MXI1	bowel,cnsbrain	Multi-cancer
MAX_MYC	bowel,cnsbrain	Multi-cancer
MAX_MYCN	bowel,cnsbrain	Multi-cancer
MAX_NBLA10317	blood,bowel,cnsbrain,uterus	Multi-cancer
MAX_PLEKHA5	bowel,cnsbrain	Multi-cancer
MAX_PLEKHF2	blood,bowel,cnsbrain,uterus	Multi-cancer
MAX_PLIN3	blood,bowel,cnsbrain,uterus	Multi-cancer
MAX_TAF1	bowel,cnsbrain	Multi-cancer
MAX_TRRAP	bowel,cnsbrain	Multi-cancer
MAX_TXLNG	blood,bowel,cnsbrain,uterus	Multi-cancer
MAX_UNC45A	bowel,cnsbrain	Multi-cancer
MBD1_SMAD3	bowel	Single-cancer
MCM3AP_RAC1	testis	Single-cancer
MCM3AP_SMAD3	bowel	Single-cancer
MDFI_VHL	kidney	Single-cancer
MED1_RXRA	bladder	Single-cancer
MED1_TP53	bladder,bowel,breast,cnsbrain,esophagusstomach,headandneck,lung,lymph,ovaryfallopiantube,pancreas,prostate,skin,softtissue,uterus	Multi-cancer
MET_MET	kidney	Single-cancer
MET_NCK1	kidney	Single-cancer
MET_NCK2	kidney	Single-cancer
MET_PIK3R1	kidney	Single-cancer
MET_PIK3R3	kidney	Single-cancer
MET_PLCG2	kidney	Single-cancer
MET_PTPN12	kidney	Single-cancer
MET_PTPN3	kidney	Single-cancer
MET_PTPRC	kidney	Single-cancer
MET_PTPRG	kidney	Single-cancer
MET_PTPRJ	kidney	Single-cancer
MET_PTPRK	kidney	Single-cancer
MET_PTPRO	kidney	Single-cancer
MET_SH2B1	kidney	Single-cancer
MET_SH2B2	kidney	Single-cancer
MET_SH2B3	kidney	Single-cancer
MET_SH2D1A	kidney	Single-cancer
MET_SH2D1B	kidney	Single-cancer
MET_SH2D2A	kidney	Single-cancer
MET_SH2D3C	kidney	Single-cancer
MET_SH3BP2	kidney	Single-cancer
MET_SHB	kidney	Single-cancer
MET_SHC1	kidney	Single-cancer
MET_SHC2	kidney	Single-cancer
MET_SHC3	kidney	Single-cancer
MET_SHC4	kidney	Single-cancer
MET_SHD	kidney	Single-cancer
MET_SLA2	kidney	Single-cancer
MET_SOCS1	kidney	Single-cancer
MET_SOCS2	kidney	Single-cancer
MET_SOCS5	kidney	Single-cancer
MET_SOCS6	kidney	Single-cancer
MET_STAP1	kidney	Single-cancer
MET_TEC	kidney	Single-cancer
MET_TNS1	kidney	Single-cancer
MET_TNS2	kidney	Single-cancer
MET_TNS3	kidney	Single-cancer
MET_TNS4	kidney	Single-cancer
MET_TXK	kidney	Single-cancer
MET_VAV2	kidney	Single-cancer
MET_VAV3	kidney	Single-cancer
MEX3B_SMAD4	bowel,esophagusstomach,pancreas	Multi-cancer
MLF2_TP53	bladder,bowel,breast,cnsbrain,esophagusstomach,headandneck,lung,lymph,ovaryfallopiantube,pancreas,prostate,skin,softtissue,uterus	Multi-cancer
MLLT4_SMAD2	bowel	Single-cancer
MOCS2_STK11	lung	Single-cancer
MPHOSPH6_TP53	bladder,breast,cnsbrain,headandneck,lung	Multi-cancer
MPRIP_RHOA	bowel,esophagusstomach,headandneck	Multi-cancer
MT-CO3_RAC1	testis	Single-cancer
MTF2_SMAD3	bowel	Single-cancer
MYD88_SPOP	prostate,uterus	Multi-cancer
MYH9_RAC1	testis	Single-cancer
MYO9B_RHOA	bowel,esophagusstomach,headandneck	Multi-cancer
MYOD1_POLR2G	softtissue	Single-cancer
MYOD1_PSME2	softtissue	Single-cancer
MYOD1_SMAD4	softtissue	Single-cancer
MYOD1_SMAD7	softtissue	Single-cancer
NAGK_SMAD2	bowel	Single-cancer
NCF1_RAC1	testis	Single-cancer
NCF2_RAC1	skin	Single-cancer
NCL_TP53	bladder,bowel,breast,cnsbrain,esophagusstomach,headandneck,lung,lymph,ovaryfallopiantube,pancreas,prostate,skin,softtissue,uterus	Multi-cancer
NCOA6_RXRA	bladder	Single-cancer
NCOA6_SMAD2	bowel	Single-cancer
NCOA6_SMAD3	bowel	Single-cancer
NDN_U2AF1	bladder,blood,lung,pancreas,uterus	Multi-cancer
NEDD4_PTEN	bowel,uterus	Multi-cancer
NEDD4L_SMAD2	bowel	Single-cancer
NEDD9_SMAD3	bowel	Single-cancer
NEK6_SMAD4	bowel,esophagusstomach,pancreas	Multi-cancer
NELFCD_SMAD4	bowel,esophagusstomach,pancreas	Multi-cancer
NET1_RHOA	bowel,esophagusstomach,headandneck,lymph	Multi-cancer
NFE2_NFE2L2	esophagusstomach,headandneck,lung	Multi-cancer
NFE2L2_PMF1	esophagusstomach,headandneck,lung	Multi-cancer
NFE2L2_PRKCA	esophagusstomach,headandneck,lung	Multi-cancer
NFE2L2_RBMX	esophagusstomach,headandneck,lung	Multi-cancer
NFE2L2_TNNT1	esophagusstomach,headandneck,lung	Multi-cancer
NFE2L2_TRIM24	esophagusstomach,headandneck,lung	Multi-cancer
NFE2L2_UBC	esophagusstomach,headandneck,lung	Multi-cancer
NFE2L2_WAC	esophagusstomach,headandneck,lung	Multi-cancer
NFKBIB_RXRA	bladder	Single-cancer
NIF3L1_STAT3	liver	Single-cancer
NLK_SMAD4	bowel,esophagusstomach,pancreas	Multi-cancer
NOS2_RAC1	testis	Single-cancer
NPM1_TP53	bladder,breast,cnsbrain,headandneck,lung	Multi-cancer
NR0B2_TP53	bladder,blood,bowel,breast,cnsbrain,esophagusstomach,headandneck,kidney,lung,lymph,ovaryfallopiantube,pancreas,prostate,skin,softtissue,uterus	Multi-cancer
NR1I2_RXRA	bladder	Single-cancer
NR1I3_RXRA	bladder	Single-cancer
NR2B1_SMAD2	bowel	Single-cancer
NR4A1_SMAD3	bowel	Single-cancer
NRAS_RPS20	biliarytract,bladder,blood,bowel,cnsbrain,esophagusstomach,headandneck,lung,ovaryfallopiantube,skin,softtissue,testis,thymus,thyroid,uterus	Multi-cancer
NRAS_SHOC2	biliarytract,bladder,blood,bowel,cnsbrain,esophagusstomach,headandneck,lung,ovaryfallopiantube,skin,softtissue,testis,thymus,thyroid,uterus	Multi-cancer
NRAS_SMAD4	biliarytract,bladder,blood,bowel,cnsbrain,esophagusstomach,headandneck,lung,ovaryfallopiantube,skin,softtissue,testis,thymus,thyroid,uterus	Multi-cancer
NRAS_SMURF2	biliarytract,bladder,blood,bowel,cnsbrain,esophagusstomach,headandneck,lung,ovaryfallopiantube,skin,softtissue,testis,thymus,thyroid,uterus	Multi-cancer
NRAS_SRI	biliarytract,bladder,blood,bowel,cnsbrain,esophagusstomach,headandneck,lung,ovaryfallopiantube,skin,softtissue,testis,thymus,thyroid,uterus	Multi-cancer
NUAK2_SMAD2	bowel	Single-cancer
NUAK2_SMAD4	bowel,esophagusstomach,pancreas	Multi-cancer
NUCB1_XPO1	blood,breast,lymph	Multi-cancer
NUCB2_XPO1	blood,breast,lymph	Multi-cancer
NXT2_STAT3	liver	Single-cancer
OCLN_SMAD4	bowel,esophagusstomach,pancreas	Multi-cancer
OGDHL_STAT3	liver	Single-cancer
OS9_SMAD2	bowel	Single-cancer
OSGIN1_PTEN	breast,uterus	Multi-cancer
PAFAH1B2_STAT3	liver	Single-cancer
PAFAH1B3_TP53	bladder,bowel,breast,cnsbrain,esophagusstomach,headandneck,lung,lymph,ovaryfallopiantube,pancreas,prostate,skin,softtissue,uterus	Multi-cancer
PAK1_SMAD2	bowel	Single-cancer
PAK1_SMAD4	bowel,esophagusstomach,pancreas	Multi-cancer
PAPOLA_SMAD2	bowel	Single-cancer
PAPPA_SMAD2	bowel	Single-cancer
PAPPA_SMAD3	bowel	Single-cancer
PAPPA2_SMAD4	bowel,esophagusstomach,pancreas	Multi-cancer
PARK2_RAC1	testis	Single-cancer
PARP1_TP53	bladder,bowel,breast,cnsbrain,esophagusstomach,headandneck,lung,lymph,ovaryfallopiantube,pancreas,prostate,skin,softtissue,uterus	Multi-cancer
PARP4_SMAD3	bowel	Single-cancer
PAX5_TLE4	bowel,esophagusstomach	Multi-cancer
PAXIP1_SMAD2	bowel	Single-cancer
PBK_SMAD4	bowel,esophagusstomach,pancreas	Multi-cancer
PBK_TP53	bladder,blood,bowel,breast,cnsbrain,esophagusstomach,headandneck,kidney,lung,lymph,ovaryfallopiantube,pancreas,prostate,skin,softtissue,uterus	Multi-cancer
PCBD2_STAT3	liver	Single-cancer
PCDH1_SMAD3	bowel	Single-cancer
PCDHA4_TP53	bladder,bowel,breast,cnsbrain,esophagusstomach,headandneck,lung,lymph,ovaryfallopiantube,pancreas,prostate,skin,softtissue,uterus	Multi-cancer
PCK2_SMAD3	bowel	Single-cancer
PDCD5_VHL	kidney	Single-cancer
PDPK1_PDPK1	skin	Single-cancer
PDPK1_PEA15	skin	Single-cancer
PDPK1_PKN1	skin	Single-cancer
PDPK1_PNN	skin	Single-cancer
PDPK1_PRSS23	skin	Single-cancer
PDPK1_PTPN12	skin	Single-cancer
PDPK1_PTPN22	skin	Single-cancer
PDPK1_PTPRB	skin	Single-cancer
PDPK1_PTPRC	skin	Single-cancer
PDPK1_PTPRG	skin	Single-cancer
PDPK1_PTPRJ	skin	Single-cancer
PDPK1_PTPRK	skin	Single-cancer
PDPK1_PTPRO	skin	Single-cancer
PDPK1_Q96FS5	skin	Single-cancer
PDPK1_SBF1	skin	Single-cancer
PDPK1_XPO7	skin	Single-cancer
PDPK1_XRCC6	skin	Single-cancer
PDPK1_ZC3HC1	skin	Single-cancer
PDPK1_ZDHHC17	skin	Single-cancer
PDPK1_ZNF133	skin	Single-cancer
PEX19_SMAD2	bowel	Single-cancer
PGR_PIAS1	skin	Single-cancer
PGR_SRC	skin	Single-cancer
PHB_TP53	bladder,bowel,breast,cnsbrain,esophagusstomach,headandneck,lung,lymph,ovaryfallopiantube,pancreas,prostate,skin,softtissue,uterus	Multi-cancer
PHC2_SMAD3	bowel	Single-cancer
PIAS1_SMAD4	bowel,esophagusstomach,pancreas	Multi-cancer
PIAS1_SPOP	prostate	Single-cancer
PIAS1_TP53	bladder,bowel,breast,cnsbrain,esophagusstomach,headandneck,lung,lymph,ovaryfallopiantube,pancreas,prostate,skin,softtissue,uterus	Multi-cancer
PIAS2_TP53	bladder,bowel,breast,cnsbrain,esophagusstomach,headandneck,lung,lymph,ovaryfallopiantube,pancreas,prostate,skin,softtissue,uterus	Multi-cancer
PIAS4_TP53	bladder,blood,bowel,breast,cnsbrain,esophagusstomach,headandneck,kidney,lung,lymph,ovaryfallopiantube,pancreas,prostate,skin,softtissue,uterus	Multi-cancer
PIK3CA_PIK3R1	biliarytract,bladder,bowel,breast,cervix,cnsbrain,esophagusstomach,headandneck,kidney,lung,ovaryfallopiantube,pancreas,penis,prostate,skin,softtissue,testis,thyroid,uterus	Multi-cancer
PIK3CA_PIK3R3	biliarytract,bladder,bowel,breast,cervix,cnsbrain,esophagusstomach,headandneck,kidney,lung,ovaryfallopiantube,pancreas,penis,prostate,skin,softtissue,testis,thyroid,uterus	Multi-cancer
PIK3CB_PIK3R1	bowel,cnsbrain,uterus	Multi-cancer
PIK3R1_PLCG2	cnsbrain	Single-cancer
PIK3R1_PTPN6	cnsbrain	Single-cancer
PIK3R1_TPSAB1	cnsbrain	Single-cancer
PIK3R1_TPSB2	cnsbrain	Single-cancer
PIN1_TP53	bladder,bowel,breast,cnsbrain,esophagusstomach,headandneck,lung,lymph,ovaryfallopiantube,pancreas,prostate,skin,softtissue,uterus	Multi-cancer
PKIA_XPO1	blood,breast,lymph	Multi-cancer
PKN1_RAC1	testis	Single-cancer
PKN1_RHOA	bladder,esophagusstomach,lymph	Multi-cancer
PLAG1_SMAD3	bowel	Single-cancer
PLCG2_TP53	bladder,bowel,breast,cnsbrain,esophagusstomach,headandneck,lung,lymph,ovaryfallopiantube,pancreas,prostate,skin,softtissue,uterus	Multi-cancer
PLD3_STK11	lung	Single-cancer
PLG_SMAD3	bowel	Single-cancer
PLG_SMAD4	bowel,esophagusstomach,pancreas	Multi-cancer
PLIN3_SMAD2	bowel	Single-cancer
PLK1_RXRA	bladder	Single-cancer
PLK1_TP53	bladder,bowel,breast,cnsbrain,esophagusstomach,headandneck,lung,lymph,ovaryfallopiantube,pancreas,prostate,skin,softtissue,uterus	Multi-cancer
PLK3_TP53	bladder,bowel,breast,cnsbrain,esophagusstomach,headandneck,lung,lymph,ovaryfallopiantube,pancreas,prostate,skin,softtissue,uterus	Multi-cancer
PLK4_SMAD4	bowel,esophagusstomach,pancreas	Multi-cancer
PML_TP53	bladder,bowel,breast,cnsbrain,esophagusstomach,headandneck,lung,lymph,ovaryfallopiantube,pancreas,prostate,skin,softtissue,uterus	Multi-cancer
PNP_TP53	bladder,bowel,breast,cnsbrain,esophagusstomach,headandneck,lung,lymph,ovaryfallopiantube,pancreas,prostate,skin,softtissue,uterus	Multi-cancer
PPA1_TP53	bladder,breast,cnsbrain,headandneck,lung	Multi-cancer
PPARD_RXRA	bladder	Single-cancer
PPARD_STAT3	liver	Single-cancer
PPARG_RXRA	bladder	Single-cancer
PPP1CA_TP53	bladder,bowel,breast,cnsbrain,esophagusstomach,headandneck,lung,lymph,ovaryfallopiantube,pancreas,prostate,skin,softtissue,uterus	Multi-cancer
PPP1R12C_SMAD3	bowel	Single-cancer
PPP1R13L_TP53	bladder,blood,bowel,breast,cnsbrain,esophagusstomach,headandneck,kidney,lung,lymph,ovaryfallopiantube,pancreas,prostate,skin,softtissue,uterus	Multi-cancer
PPP2R1A_PPP2R1B	bowel,breast,headandneck,ovaryfallopiantube,prostate,uterus	Multi-cancer
PPP2R1A_PPP2R3A	bowel,breast,headandneck,ovaryfallopiantube,prostate,uterus	Multi-cancer
PPP2R1A_PPP2R3B	uterus	Single-cancer
PPP2R1A_PPP2R5A	bowel,breast,headandneck,ovaryfallopiantube,prostate,uterus	Multi-cancer
PPP2R1A_PPP2R5D	bowel,breast,headandneck,ovaryfallopiantube,prostate,uterus	Multi-cancer
PPP2R1A_SMAD2	bowel	Single-cancer
PPP2R1A_SMAD3	bowel	Single-cancer
PPP2R1A_TAB1	bowel,breast,headandneck,ovaryfallopiantube,prostate,uterus	Multi-cancer
PPP2R2B_SMAD2	bowel	Single-cancer
PPP2R2D_SMAD2	bowel	Single-cancer
PPP6C_PPP6R1	skin	Single-cancer
PPP6C_PPP6R2	skin	Single-cancer
PPP6C_PPP6R3	skin	Single-cancer
PPP6C_TGFBR1	skin	Single-cancer
PRDM4_SMAD3	bowel	Single-cancer
PREX1_RAC1	testis	Single-cancer
PRKAA1_STK11	lung	Single-cancer
PRKAB2_TP53	bladder,blood,bowel,breast,cnsbrain,esophagusstomach,headandneck,kidney,lung,lymph,ovaryfallopiantube,pancreas,prostate,skin,softtissue,uterus	Multi-cancer
PRKAR1A_SMAD2	bowel	Single-cancer
PRKCI_PRKCZ	bowel	Single-cancer
PRKD2_RXRA	bladder	Single-cancer
PRKDC_TP53	bladder,bowel,breast,cnsbrain,esophagusstomach,headandneck,lung,lymph,ovaryfallopiantube,pancreas,prostate,skin,softtissue,uterus	Multi-cancer
PRMT1_VHL	kidney	Single-cancer
PRMT6_RAC1	testis	Single-cancer
PRMT8_VHL	kidney	Single-cancer
PROX1_SMAD3	bowel	Single-cancer
PRPF40A_SMAD4	bowel,esophagusstomach,pancreas	Multi-cancer
PSAP_SMAD2	bowel	Single-cancer
PSAT1_RAC1	testis	Single-cancer
PSEN1_RHEB	kidney,testis,uterus	Multi-cancer
PSG11S'_SMAD2	bowel	Single-cancer
PSG11S'_SMAD4	bowel,esophagusstomach,pancreas	Multi-cancer
PSG2_SMAD4	bowel,esophagusstomach,pancreas	Multi-cancer
PSG9_SMAD2	bowel	Single-cancer
PSG9_SMAD4	bowel,esophagusstomach,pancreas	Multi-cancer
PSMD11_SMAD2	bowel	Single-cancer
PSMD11_SMAD4	bowel,esophagusstomach,pancreas	Multi-cancer
PSMD11_TP53	bladder,bowel,breast,cnsbrain,esophagusstomach,headandneck,lung,lymph,ovaryfallopiantube,pancreas,prostate,skin,softtissue,uterus	Multi-cancer
PSMD8_SMAD2	bowel	Single-cancer
PTEN_PTEN	bowel,uterus	Multi-cancer
PTEN_RAA1	uterus	Single-cancer
PTEN_SLC9A3R1	breast,uterus	Multi-cancer
PTEN_SPOP	prostate,uterus	Multi-cancer
PTEN_UBC	bowel,uterus	Multi-cancer
PTEN_USP13	uterus	Single-cancer
PTEN_USP7	bowel,uterus	Multi-cancer
PTEN_UTP14A	bowel,uterus	Multi-cancer
PTK2_RAC1	testis	Single-cancer
PTPN1_STAT3	liver	Single-cancer
Q13746_TP53	bladder,bowel,breast,cnsbrain,esophagusstomach,headandneck,lung,lymph,ovaryfallopiantube,pancreas,prostate,skin,softtissue,uterus	Multi-cancer
Q53FC7_TP53	bladder,blood,bowel,breast,cnsbrain,esophagusstomach,headandneck,kidney,lung,lymph,ovaryfallopiantube,pancreas,prostate,skin,softtissue,uterus	Multi-cancer
Q6U7G8_RAC1	testis	Single-cancer
Q7Z4P3_SMAD2	bowel	Single-cancer
Q8HHH1_SMAD4	bowel,esophagusstomach,pancreas	Multi-cancer
Q8NAK2_SMAD2	bowel	Single-cancer
Q8NBH6_SMAD4	bowel,esophagusstomach,pancreas	Multi-cancer
Q8NC59_SMAD2	bowel	Single-cancer
Q8WVM9_TCEB1	kidney	Single-cancer
Q96BE0_TP53	bladder,bowel,breast,cnsbrain,esophagusstomach,headandneck,lung,lymph,ovaryfallopiantube,pancreas,prostate,skin,softtissue,uterus	Multi-cancer
Q9NRC3_SMAD2	bowel	Single-cancer
Q9P0T0_SMAD2	bowel	Single-cancer
Q9P0T0_SMAD4	bowel,esophagusstomach,pancreas	Multi-cancer
RAB34_SMAD4	bowel,esophagusstomach,pancreas	Multi-cancer
RAB4A_TP53	bladder,bowel,breast,cnsbrain,esophagusstomach,headandneck,lung,lymph,ovaryfallopiantube,pancreas,prostate,skin,softtissue,uterus	Multi-cancer
RAC1_RAC1	skin,testis	Multi-cancer
RAC1_RAP1GDS1	testis	Single-cancer
RAC1_RELA	testis	Single-cancer
RAC1_SFPQ	testis	Single-cancer
RAC1_SH3RF1	testis	Single-cancer
RAC1_SMURF2	testis	Single-cancer
RAC1_SNX26	testis	Single-cancer
RAC1_SNX31	testis	Single-cancer
RAC1_SYNJ2	testis	Single-cancer
RAC1_TIAM1	testis	Single-cancer
RAC1_TRIO	testis	Single-cancer
RAC1_UBC	testis	Single-cancer
RAC1_USH1C	testis	Single-cancer
RAC1_VAV1	skin,testis	Multi-cancer
RAC1_VCAM1	testis	Single-cancer
RAC1_VWF	testis	Single-cancer
RAC2_SMAD4	bowel,esophagusstomach	Multi-cancer
RACK1_RHOA	bowel,esophagusstomach,headandneck,lymph	Multi-cancer
RAD51_TP53	bladder,bowel,breast,cnsbrain,esophagusstomach,headandneck,lung,lymph,ovaryfallopiantube,pancreas,prostate,skin,softtissue,uterus	Multi-cancer
RAF1_SFN	bowel,lung	Multi-cancer
RAF1_YWHAB	bowel,lung	Multi-cancer
RAF1_YWHAG	bowel,lung	Multi-cancer
RAF1_YWHAZ	bowel,lung	Multi-cancer
RANBP6_SMAD2	bowel	Single-cancer
RANBP9_SMAD2	bowel	Single-cancer
RANBP9_SMAD3	bowel	Single-cancer
RAP1B_TP53	bladder,bowel,breast,cnsbrain,esophagusstomach,headandneck,lung,lymph,ovaryfallopiantube,pancreas,prostate,skin,softtissue,uterus	Multi-cancer
RARB_RXRA	bladder	Single-cancer
RARB_SMAD2	bowel	Single-cancer
RASD2_SMAD2	bowel	Single-cancer
RASD2_SMAD4	bowel,esophagusstomach,pancreas	Multi-cancer
RASL12_SMAD2	bowel	Single-cancer
RASL12_SMAD4	bowel,esophagusstomach,pancreas	Multi-cancer
RBX1_VHL	kidney	Single-cancer
RCC1_TP53	bladder,bowel,breast,cnsbrain,esophagusstomach,headandneck,lung,lymph,ovaryfallopiantube,pancreas,prostate,skin,softtissue,uterus	Multi-cancer
RCHY1_TP53	bladder,bowel,breast,cnsbrain,esophagusstomach,headandneck,lung,lymph,ovaryfallopiantube,pancreas,prostate,skin,softtissue,uterus	Multi-cancer
RCN2_XPO1	blood,breast,lymph	Multi-cancer
RELA_SMAD3	bowel	Single-cancer
RELA_SMAD4	bowel,esophagusstomach,pancreas	Multi-cancer
RFWD2_TP53	bladder,blood,bowel,breast,cnsbrain,esophagusstomach,headandneck,kidney,lung,lymph,ovaryfallopiantube,pancreas,prostate,skin,softtissue,uterus	Multi-cancer
RFX1_SMAD4	bowel,esophagusstomach,pancreas	Multi-cancer
RGS14_XPO1	blood,breast,lymph	Multi-cancer
RGS3_SMAD2	bowel	Single-cancer
RGS3_SMAD3	bowel	Single-cancer
RHEBL1_SMAD2	bowel	Single-cancer
RHOA_ROCK1	headandneck	Single-cancer
RHOA_RPN2	bowel,esophagusstomach,headandneck	Multi-cancer
RHOA_RTKN	bowel,esophagusstomach,headandneck	Multi-cancer
RHOA_SMURF1	bowel,esophagusstomach,headandneck	Multi-cancer
RHOA_SMURF2	bowel,esophagusstomach,headandneck,lymph	Multi-cancer
RHOA_TGFBR1	bowel,esophagusstomach,headandneck,lymph	Multi-cancer
RHOA_TRIP6	bowel,esophagusstomach,headandneck	Multi-cancer
RHOBTB1_SMAD2	bowel	Single-cancer
RHOD_SMAD2	bowel	Single-cancer
RIC8A_XPO1	blood,breast,lymph	Multi-cancer
RIOK2_SMAD3	bowel	Single-cancer
RIPK2_SMAD4	bowel,esophagusstomach,pancreas	Multi-cancer
RNF123_SMAD2	bowel	Single-cancer
RNF14_SMAD4	bowel,esophagusstomach,pancreas	Multi-cancer
RNF31_SMAD3	bowel	Single-cancer
RNPC3_SMAD2	bowel	Single-cancer
ROCK1_SMAD2	bowel	Single-cancer
RPA1_SMAD3	bowel	Single-cancer
RPA2_STAT3	liver	Single-cancer
RPL11_STAT3	liver	Single-cancer
RPS6KA6_RXRA	bladder	Single-cancer
RPS9_STAT3	liver	Single-cancer
RRAS2_SMURF2	lung,uterus	Multi-cancer
RRM2B_TP53	bladder,blood,bowel,breast,cnsbrain,esophagusstomach,headandneck,kidney,lung,lymph,ovaryfallopiantube,pancreas,prostate,skin,softtissue,uterus	Multi-cancer
RSPH14_SMAD4	bowel,esophagusstomach,pancreas	Multi-cancer
RTN3_SPOP	prostate	Single-cancer
RUNX1_RUNX1	blood	Single-cancer
RXRA_RXRA	bladder	Single-cancer
RXRA_SMAD2	bladder,bowel	Multi-cancer
RXRA_STAT1	bladder	Single-cancer
RXRA_THRA	bladder	Single-cancer
RXRA_THRB	bladder	Single-cancer
RXRA_TMPRSS3	bladder	Single-cancer
RXRA_TRIP4	bladder	Single-cancer
RXRA_UBQLN4	bladder	Single-cancer
RXRA_VDR	bladder	Single-cancer
RXRB_SPOP	prostate	Single-cancer
S100A8_TP53	bladder,bowel,breast,cnsbrain,esophagusstomach,headandneck,lung,lymph,ovaryfallopiantube,pancreas,prostate,skin,softtissue,uterus	Multi-cancer
SAP130_SMAD3	bowel	Single-cancer
SAT1_TP53	bladder,bowel,breast,cnsbrain,esophagusstomach,headandneck,lung,lymph,ovaryfallopiantube,pancreas,prostate,skin,softtissue,uterus	Multi-cancer
SAT2_TGFBR1	bowel	Single-cancer
SCAMP1_TP53	bladder,blood,bowel,breast,cnsbrain,esophagusstomach,headandneck,kidney,lung,lymph,ovaryfallopiantube,pancreas,prostate,skin,softtissue,uterus	Multi-cancer
SECISBP2L_SMAD3	bowel	Single-cancer
SERPINB9_TP53	bladder,bowel,breast,cnsbrain,esophagusstomach,headandneck,lung,lymph,ovaryfallopiantube,pancreas,prostate,skin,softtissue,uterus	Multi-cancer
SERTAD1_TCEB1	kidney	Single-cancer
SETD2_SMAD3	bowel	Single-cancer
SIAH1_STAT3	liver	Single-cancer
SIAH2_STAT3	liver	Single-cancer
SIRT1_TP53	bladder,bowel,breast,cnsbrain,esophagusstomach,headandneck,lung,lymph,ovaryfallopiantube,pancreas,prostate,skin,softtissue,uterus	Multi-cancer
SMAD1_SMAD4	biliarytract,bowel,breast,esophagusstomach,lung,pancreas	Multi-cancer
SMAD2_SMAD2	bowel	Single-cancer
SMAD2_SMAD3	bowel	Single-cancer
SMAD2_SMAD4	biliarytract,bowel,breast,esophagusstomach,lung,pancreas	Multi-cancer
SMAD2_SMAD9	bowel	Single-cancer
SMAD2_SMURF1	bowel	Single-cancer
SMAD2_SNAPIN	bowel	Single-cancer
SMAD2_SNRNP70	bowel	Single-cancer
SMAD2_SQSTM1	bowel	Single-cancer
SMAD2_SRI	bowel	Single-cancer
SMAD2_ST13	bowel	Single-cancer
SMAD2_ST5	bowel	Single-cancer
SMAD2_STAG1	bowel	Single-cancer
SMAD2_TBC1D1	bowel	Single-cancer
SMAD2_TGM2	bowel	Single-cancer
SMAD2_TRIM62	bowel	Single-cancer
SMAD2_UBR5	bowel	Single-cancer
SMAD2_UHMK1	bowel	Single-cancer
SMAD2_ZEB2	bowel	Single-cancer
SMAD2_ZMYND11	bowel	Single-cancer
SMAD2_ZNF41	bowel	Single-cancer
SMAD2_ZNHIT6	bowel	Single-cancer
SMAD3_SMAD3	bowel	Single-cancer
SMAD3_SMAD4	biliarytract,bowel,breast,esophagusstomach,lung,pancreas	Multi-cancer
SMAD3_SMAD9	bowel	Single-cancer
SMAD3_SNRNP70	bowel	Single-cancer
SMAD3_SQSTM1	bowel	Single-cancer
SMAD3_SVEP1	bowel	Single-cancer
SMAD3_TF	bowel	Single-cancer
SMAD3_TGM2	bowel	Single-cancer
SMAD3_TLR4	bowel	Single-cancer
SMAD3_TRIM35	bowel	Single-cancer
SMAD3_TSC22D4	bowel	Single-cancer
SMAD3_UBQLN4	bowel	Single-cancer
SMAD3_USP7	bowel	Single-cancer
SMAD3_WEE1	bowel	Single-cancer
SMAD3_XRCC6	bowel	Single-cancer
SMAD3_ZBTB16	bowel	Single-cancer
SMAD3_ZBTB3	bowel	Single-cancer
SMAD3_ZC3H12A	bowel	Single-cancer
SMAD3_ZCCHC14	bowel	Single-cancer
SMAD3_ZEB2	bowel	Single-cancer
SMAD3_ZMYND11	bowel	Single-cancer
SMAD3_ZNF251	bowel	Single-cancer
SMAD3_ZNF329	bowel	Single-cancer
SMAD3_ZNF83	bowel	Single-cancer
SMAD4_SMAD4	biliarytract,bowel,breast,esophagusstomach,lung,pancreas	Multi-cancer
SMAD4_SMAD5	biliarytract,bowel,breast,esophagusstomach,lung,pancreas	Multi-cancer
SMAD4_SMAD9	biliarytract,bowel,breast,esophagusstomach,lung,pancreas	Multi-cancer
SMAD4_SOX12	bowel,esophagusstomach,pancreas	Multi-cancer
SMAD4_SP1	bowel,esophagusstomach,pancreas	Multi-cancer
SMAD4_SQSTM1	bowel,esophagusstomach,pancreas	Multi-cancer
SMAD4_STAT1	bowel,esophagusstomach,pancreas	Multi-cancer
SMAD4_STK11IP	bowel,esophagusstomach,pancreas	Multi-cancer
SMAD4_STK35	bowel,esophagusstomach,pancreas	Multi-cancer
SMAD4_STRADA	bowel,esophagusstomach,pancreas	Multi-cancer
SMAD4_TDG	bowel,esophagusstomach,pancreas	Multi-cancer
SMAD4_TENM3	bowel,esophagusstomach,pancreas	Multi-cancer
SMAD4_TGFBR1	bowel,esophagusstomach,pancreas	Multi-cancer
SMAD4_TM9SF2	bowel,esophagusstomach,pancreas	Multi-cancer
SMAD4_TRIM33	bowel,esophagusstomach,pancreas	Multi-cancer
SMAD4_TRIM35	bowel,esophagusstomach,pancreas	Multi-cancer
SMAD4_TSSK3	bowel,esophagusstomach	Multi-cancer
SMAD4_UHMK1	bowel,esophagusstomach,pancreas	Multi-cancer
SMAD4_UHRF2	bowel,esophagusstomach,pancreas	Multi-cancer
SMAD4_XPO5	bowel,esophagusstomach,pancreas	Multi-cancer
SMAD4_ZBED5	bowel,esophagusstomach,pancreas	Multi-cancer
SMAD4_ZMYM2	bowel,esophagusstomach,pancreas	Multi-cancer
SMARCC1_TP53	bladder,bowel,breast,cnsbrain,esophagusstomach,headandneck,lung,lymph,ovaryfallopiantube,pancreas,prostate,skin,softtissue,uterus	Multi-cancer
SMN1_TP53	bladder,bowel,breast,cnsbrain,esophagusstomach,headandneck,lung,lymph,ovaryfallopiantube,pancreas,prostate,skin,softtissue,uterus	Multi-cancer
SNRPN_TP53	bladder,blood,bowel,breast,cnsbrain,esophagusstomach,headandneck,kidney,lung,lymph,ovaryfallopiantube,pancreas,prostate,skin,softtissue,uterus	Multi-cancer
SNUPN_XPO1	blood,breast,lymph	Multi-cancer
SNURF_TP53	bladder,bowel,breast,cnsbrain,esophagusstomach,headandneck,lung,lymph,ovaryfallopiantube,pancreas,prostate,skin,softtissue,uterus	Multi-cancer
SOCS2_TCEB1	kidney	Single-cancer
SOCS4_TCEB1	kidney	Single-cancer
SP1_TP53	bladder,bowel,breast,cnsbrain,esophagusstomach,headandneck,lung,lymph,ovaryfallopiantube,pancreas,prostate,skin,softtissue,uterus	Multi-cancer
SPOP_SPOP	prostate	Single-cancer
SPOP_SRRM1	prostate	Single-cancer
SPOP_ZBTB16	prostate	Single-cancer
SRC_STAT3	liver	Single-cancer
SRI_STAT3	liver	Single-cancer
STAT1_STAT3	liver	Single-cancer
STAT1_TP53	bladder,blood,bowel,breast,cnsbrain,esophagusstomach,headandneck,kidney,lung,lymph,ovaryfallopiantube,pancreas,prostate,skin,softtissue,uterus	Multi-cancer
STAT3_STAT6	liver	Single-cancer
STAT3_SULT2A1	liver	Single-cancer
STAT3_SYK	liver	Single-cancer
STAT3_TDG	liver	Single-cancer
STK11_STK11	lung	Single-cancer
STK11_STRADB	lung	Single-cancer
STK11_STUB1	lung	Single-cancer
STK11_TSG101	lung	Single-cancer
STK11_VPS72	lung	Single-cancer
STUB1_TP53	bladder,blood,bowel,breast,cnsbrain,esophagusstomach,headandneck,kidney,lung,lymph,ovaryfallopiantube,pancreas,prostate,skin,softtissue,uterus	Multi-cancer
STX5_TP53	bladder,breast,cnsbrain,headandneck,lung	Multi-cancer
SULT1E1_TP53	bladder,blood,bowel,breast,cnsbrain,esophagusstomach,headandneck,kidney,lung,lymph,ovaryfallopiantube,pancreas,prostate,skin,softtissue,uterus	Multi-cancer
SUMO1_TP53	bladder,bowel,breast,cnsbrain,esophagusstomach,headandneck,lung,lymph,ovaryfallopiantube,pancreas,prostate,skin,softtissue,uterus	Multi-cancer
TAF9_TP53	cnsbrain,lung	Multi-cancer
TCEB1_TCEB2	kidney	Single-cancer
TCEB1_VHL	kidney	Single-cancer
TCEB1_WSB1	kidney	Single-cancer
TCEB2_VHL	kidney	Single-cancer
TERF2IP_XPO1	blood,breast,lymph	Multi-cancer
THAP8_TP53	bladder,bowel,breast,cnsbrain,esophagusstomach,headandneck,lung,lymph,ovaryfallopiantube,pancreas,prostate,skin,softtissue,uterus	Multi-cancer
TK1_TP53	bladder,bowel,breast,cnsbrain,esophagusstomach,headandneck,lung,lymph,ovaryfallopiantube,pancreas,prostate,skin,softtissue,uterus	Multi-cancer
TMSB4X_TP53	bladder,bowel,breast,cnsbrain,esophagusstomach,headandneck,lung,lymph,ovaryfallopiantube,pancreas,prostate,skin,softtissue,uterus	Multi-cancer
TOPORS_TP53	bladder,bowel,breast,cnsbrain,esophagusstomach,headandneck,lung,lymph,ovaryfallopiantube,pancreas,prostate,skin,softtissue,uterus	Multi-cancer
TP53_TP53	bladder,bowel,breast,cnsbrain,esophagusstomach,headandneck,liver,lung,lymph,ovaryfallopiantube,pancreas,prostate,skin,softtissue,uterus	Multi-cancer
TP53_TP53BP1	bladder,bowel,breast,cnsbrain,esophagusstomach,headandneck,liver,lung,lymph,ovaryfallopiantube,pancreas,prostate,skin,softtissue,uterus	Multi-cancer
TP53_TP53BP2	bladder,blood,bowel,breast,cnsbrain,esophagusstomach,headandneck,kidney,liver,lung,lymph,ovaryfallopiantube,pancreas,prostate,skin,softtissue,uterus	Multi-cancer
TP53_TP53TG1	bladder,bowel,breast,cnsbrain,esophagusstomach,headandneck,lung,lymph,ovaryfallopiantube,pancreas,prostate,skin,softtissue,uterus	Multi-cancer
TP53_TPT1	bladder,blood,bowel,breast,cnsbrain,esophagusstomach,headandneck,kidney,lung,lymph,ovaryfallopiantube,pancreas,prostate,skin,softtissue,uterus	Multi-cancer
TP53_TWIST1	bladder,blood,bowel,breast,cnsbrain,esophagusstomach,headandneck,kidney,lung,lymph,ovaryfallopiantube,pancreas,prostate,skin,softtissue,uterus	Multi-cancer
TP53_UBA52	bladder,blood,bowel,breast,cnsbrain,esophagusstomach,headandneck,kidney,lung,lymph,ovaryfallopiantube,pancreas,prostate,skin,softtissue,uterus	Multi-cancer
TP53_UBC	bladder,bowel,breast,cnsbrain,esophagusstomach,headandneck,lung,lymph,ovaryfallopiantube,pancreas,prostate,skin,softtissue,uterus	Multi-cancer
TP53_UBE2I	bladder,blood,bowel,breast,cnsbrain,esophagusstomach,headandneck,kidney,lung,lymph,ovaryfallopiantube,pancreas,prostate,skin,softtissue,uterus	Multi-cancer
TP53_UBE3A	bladder,bowel,breast,cnsbrain,esophagusstomach,headandneck,lung,lymph,ovaryfallopiantube,pancreas,prostate,skin,softtissue,uterus	Multi-cancer
TP53_UFD1	bladder,bowel,breast,cnsbrain,esophagusstomach,headandneck,lung,lymph,ovaryfallopiantube,pancreas,prostate,skin,softtissue,uterus	Multi-cancer
TP53_UFD1L	bladder,bowel,breast,cnsbrain,esophagusstomach,headandneck,lung,lymph,ovaryfallopiantube,pancreas,prostate,skin,softtissue,uterus	Multi-cancer
TP53_VRK1	bladder,bowel,breast,cnsbrain,esophagusstomach,headandneck,lung,lymph,ovaryfallopiantube,pancreas,prostate,skin,softtissue,uterus	Multi-cancer
TP53_WDR33	bladder,bowel,breast,cnsbrain,esophagusstomach,headandneck,lung,lymph,ovaryfallopiantube,pancreas,prostate,skin,softtissue,uterus	Multi-cancer
TP53_WRN	bladder,bowel,breast,cnsbrain,esophagusstomach,headandneck,lung,lymph,ovaryfallopiantube,pancreas,prostate,skin,softtissue,uterus	Multi-cancer
TP53_WWOX	bladder,bowel,breast,cnsbrain,esophagusstomach,headandneck,lung,lymph,ovaryfallopiantube,pancreas,prostate,skin,softtissue,uterus	Multi-cancer
TP53_ZCCHC10	bladder,bowel,breast,cnsbrain,esophagusstomach,headandneck,lung,lymph,ovaryfallopiantube,pancreas,prostate,skin,softtissue,uterus	Multi-cancer
TP53_ZHX1	bladder,bowel,breast,cnsbrain,esophagusstomach,headandneck,lung,lymph,ovaryfallopiantube,pancreas,prostate,skin,softtissue,uterus	Multi-cancer
TP53_ZNF24	bladder,bowel,breast,cnsbrain,esophagusstomach,headandneck,lung,lymph,ovaryfallopiantube,pancreas,prostate,skin,softtissue,uterus	Multi-cancer
TUBB_XPO1	blood,breast,lymph	Multi-cancer
TUFM_XPO1	blood,breast,lymph	Multi-cancer
USP33_VHL	kidney	Single-cancer
VBP1_VHL	kidney	Single-cancer
VCAM1_XPO1	blood,breast,lymph	Multi-cancer
VHL_ZNF512B	kidney	Single-cancer
XPO1_XPO7	blood,breast,lymph	Multi-cancer

## Sheet: Hotspot_frequencies
Gene	Hotspot	Cancer_type	Total_samples	Mutated_samples	Hotspot_frequency
ERBB4	K1223	esophagusstomach	1407	5	0.00355366
GNAS	R201	biliarytract	358	3	0.00837989
GNAS	R201	bowel	1782	53	0.0297419
GNAS	R201	cervix	239	3	0.0125523
GNAS	R201	esophagusstomach	1407	17	0.0120824
GNAS	R201	liver	636	4	0.00628931
GNAS	R201	lung	2761	9	0.00325969
GNAS	R201	pancreas	1059	35	0.03305
KRAS	G13	biliarytract	358	4	0.0111732
KRAS	G13	bladder	958	3	0.00313152
KRAS	G13	blood	890	12	0.0134831
KRAS	G13	bowel	1782	130	0.0729517
KRAS	G13	cervix	239	4	0.0167364
KRAS	G13	esophagusstomach	1407	17	0.0120824
KRAS	G13	lung	2761	57	0.0206447
KRAS	G13	lymph	366	3	0.00819672
KRAS	G13	pancreas	1059	7	0.00661001
KRAS	G13	uterus	618	12	0.0194175
TP53	G244	cnsbrain	2270	8	0.00352423
TP53	G244	esophagusstomach	1407	7	0.00497512
TP53	G244	lung	2761	17	0.00615719
TP53	G244	ovaryfallopiantube	699	7	0.0100143
VHL	S111	kidney	1304	10	0.00766871
MED12	V1223	prostate	1379	3	0.00217549
PIK3CA	G1049	bowel	1782	3	0.0016835
PIK3CA	G1049	breast	2561	7	0.00273331
PIK3CA	G1049	uterus	618	3	0.00485437
PIK3CA	E726	bladder	958	6	0.00626305
PIK3CA	E726	bowel	1782	5	0.00280584
PIK3CA	E726	breast	2561	24	0.00937134
PIK3CA	E726	lung	2761	6	0.00217313
CDKN2A	L130	pancreas	1059	4	0.00377715
CDKN2A	L130	skin	974	3	0.00308008
EGFR	L838	kidney	1304	3	0.00230061
TP53	G266	bowel	1782	12	0.00673401
TP53	G266	breast	2561	9	0.00351425
TP53	G266	cnsbrain	2270	9	0.00396476
TP53	G266	esophagusstomach	1407	6	0.00426439
TP53	G266	headandneck	988	8	0.00809717
TP53	G266	lung	2761	21	0.00760594
TP53	G266	ovaryfallopiantube	699	7	0.0100143
TP53	G266	pancreas	1059	11	0.0103872
TP53	G266	uterus	618	5	0.00809061
TP53	L194	breast	2561	9	0.00351425
TP53	L194	lung	2761	11	0.00398406
TP53	L194	pancreas	1059	5	0.00472144
CDKN2A	R80	bladder	958	5	0.00521921
CDKN2A	R80	bowel	1782	5	0.00280584
CDKN2A	R80	esophagusstomach	1407	11	0.00781805
CDKN2A	R80	headandneck	988	26	0.0263158
CDKN2A	R80	lung	2761	11	0.00398406
CDKN2A	R80	pancreas	1059	12	0.0113314
CDKN2A	R80	skin	974	17	0.0174538
TP53	R337	breast	2561	6	0.00234283
TP53	R337	lung	2761	17	0.00615719
AR	T877	prostate	1379	15	0.0108774
MAX	R60	bowel	1782	6	0.003367
MAX	R60	cnsbrain	2270	6	0.00264317
PTEN	R233	bowel	1782	7	0.00392817
PTEN	R233	uterus	618	16	0.02589
VHL	S68	kidney	1304	8	0.00613497
PTEN	G129	uterus	618	5	0.00809061
FBXW7	D520	bowel	1782	5	0.00280584
TP53	H214	bladder	958	3	0.00313152
TP53	H214	esophagusstomach	1407	4	0.00284293
TP53	H214	lung	2761	10	0.00362188
TP53	H214	pancreas	1059	6	0.00566572
RHOA	L22	esophagusstomach	1407	3	0.0021322
AKT1	L52	breast	2561	4	0.00156189
SOX17	S403	uterus	618	7	0.0113269
STK11	E223	lung	2761	13	0.00470844
STK11	S216	lung	2761	8	0.0028975
EGFR	L62	cnsbrain	2270	6	0.00264317
EGFR	L62	lung	2761	4	0.00144875
SMARCA4	R973	lymph	366	3	0.00819672
TGFBR1	I259	cervix	239	2	0.0083682
FOXA1	R261	prostate	1379	8	0.00580131
VHL	W88	kidney	1304	9	0.00690184
TP53	C277	lung	2761	8	0.0028975
MET	Y1003	lung	2761	3	0.00108656
SF3B1	G740	lung	2761	4	0.00144875
NFE2L2	Q26	lung	2761	4	0.00144875
CCND1	Y44	lymph	366	7	0.0191257
PIK3CA	E545	biliarytract	358	8	0.0223464
PIK3CA	E545	bladder	958	90	0.0939457
PIK3CA	E545	bowel	1782	97	0.0544332
PIK3CA	E545	breast	2561	174	0.0679422
PIK3CA	E545	cervix	239	34	0.142259
PIK3CA	E545	cnsbrain	2270	22	0.00969163
PIK3CA	E545	esophagusstomach	1407	35	0.0248756
PIK3CA	E545	headandneck	988	48	0.048583
PIK3CA	E545	kidney	1304	8	0.00613497
PIK3CA	E545	lung	2761	51	0.0184716
PIK3CA	E545	ovaryfallopiantube	699	5	0.00715308
PIK3CA	E545	pancreas	1059	5	0.00472144
PIK3CA	E545	penis	6	3	0.5
PIK3CA	E545	prostate	1379	8	0.00580131
PIK3CA	E545	skin	974	7	0.00718686
PIK3CA	E545	testis	217	2	0.00921659
PIK3CA	E545	thyroid	618	3	0.00485437
PIK3CA	E545	uterus	618	30	0.0485437
MTOR	L1460	kidney	1304	3	0.00230061
FBXW7	R479	bladder	958	8	0.00835073
FBXW7	R479	bowel	1782	12	0.00673401
FBXW7	R479	cervix	239	4	0.0167364
FBXW7	R479	esophagusstomach	1407	4	0.00284293
FBXW7	R479	headandneck	988	5	0.00506073
FBXW7	R479	lung	2761	4	0.00144875
FBXW7	R479	uterus	618	12	0.0194175
NFE2L2	L30	headandneck	988	4	0.00404858
SPOP	Y87	prostate	1379	14	0.0101523
PRKCI	R480	bowel	1782	6	0.003367
SMAD2	C463	bowel	1782	4	0.00224467
MTOR	L2427	kidney	1304	5	0.00383436
FGFR2	C382	biliarytract	358	2	0.00558659
FGFR2	C382	esophagusstomach	1407	3	0.0021322
FGFR2	C382	uterus	618	7	0.0113269
KEAP1	G417	lung	2761	7	0.00253531
PIM1	K24	lymph	366	7	0.0191257
HRAS	Q61	adrenalgland	291	17	0.0584192
HRAS	Q61	bladder	958	19	0.019833
HRAS	Q61	headandneck	988	11	0.0111336
HRAS	Q61	lung	2761	3	0.00108656
HRAS	Q61	prostate	1379	10	0.00725163
HRAS	Q61	skin	974	11	0.0112936
HRAS	Q61	softtissue	739	3	0.00405954
HRAS	Q61	thyroid	618	22	0.0355987
RAC1	P29	skin	974	42	0.0431211
PIK3CA	G106	bladder	958	4	0.00417537
PIK3CA	G106	uterus	618	4	0.00647249
ARID1B	T1639	skin	974	2	0.00205339
MTOR	S2215	bowel	1782	5	0.00280584
MTOR	S2215	kidney	1304	4	0.00306748
ERBB2	V659	lung	2761	4	0.00144875
FOXP1	R514	bladder	958	3	0.00313152
FOXA1	I176	breast	2561	10	0.00390472
PAK7	M173	skin	974	11	0.0112936
JUN	E112	bladder	958	4	0.00417537
TP53	V173	bowel	1782	12	0.00673401
TP53	V173	breast	2561	6	0.00234283
TP53	V173	cnsbrain	2270	6	0.00264317
TP53	V173	esophagusstomach	1407	10	0.00710732
TP53	V173	headandneck	988	7	0.00708502
TP53	V173	lung	2761	9	0.00325969
TP53	V173	pancreas	1059	4	0.00377715
TP53	V173	uterus	618	3	0.00485437
KRAS	G60	bowel	1782	9	0.00505051
KDR	C482	lymph	366	2	0.00546448
GTF2I	F641	skin	974	3	0.00308008
GLI1	R380	bowel	1782	5	0.00280584
IRF4	C99	lymph	366	4	0.010929
KRAS	G12	ampullaofvater	23	10	0.434783
KRAS	G12	biliarytract	358	21	0.0586592
KRAS	G12	bladder	958	36	0.0375783
KRAS	G12	blood	890	13	0.0146067
KRAS	G12	bowel	1782	500	0.280584
KRAS	G12	breast	2561	15	0.00585709
KRAS	G12	cervix	239	15	0.0627615
KRAS	G12	cnsbrain	2270	6	0.00264317
KRAS	G12	esophagusstomach	1407	40	0.0284293
KRAS	G12	headandneck	988	3	0.00303644
KRAS	G12	kidney	1304	5	0.00383436
KRAS	G12	lung	2761	570	0.206447
KRAS	G12	ovaryfallopiantube	699	25	0.0357654
KRAS	G12	pancreas	1059	745	0.703494
KRAS	G12	prostate	1379	4	0.00290065
KRAS	G12	skin	974	4	0.00410678
KRAS	G12	softtissue	739	8	0.0108254
KRAS	G12	testis	217	19	0.0875576
KRAS	G12	thymus	162	2	0.0123457
KRAS	G12	thyroid	618	3	0.00485437
KRAS	G12	uterus	618	84	0.135922
MYD88	S230	lymph	366	6	0.0163934
AKT1	E17	bladder	958	6	0.00626305
AKT1	E17	bowel	1782	13	0.00729517
AKT1	E17	breast	2561	80	0.0312378
AKT1	E17	cervix	239	3	0.0125523
AKT1	E17	esophagusstomach	1407	3	0.0021322
AKT1	E17	headandneck	988	3	0.00303644
AKT1	E17	lung	2761	8	0.0028975
AKT1	E17	prostate	1379	8	0.00580131
AKT1	E17	thyroid	618	3	0.00485437
AKT1	E17	uterus	618	8	0.012945
PIK3R1	N564	bowel	1782	5	0.00280584
PIK3R1	N564	cnsbrain	2270	6	0.00264317
EGFR	H304	cnsbrain	2270	5	0.00220264
FGFR3	K650	bladder	958	4	0.00417537
PTEN	C136	uterus	618	4	0.00647249
ATM	R250	bowel	1782	5	0.00280584
IL7R	R206	skin	974	8	0.00821355
TP53	R110	lung	2761	13	0.00470844
STAT3	H410	liver	636	4	0.00628931
CTCF	Y226	breast	2561	4	0.00156189
ASXL2	E330	bladder	958	8	0.00835073
B2M	L7	lymph	366	3	0.00819672
B2M	L7	skin	974	2	0.00205339
TCF3	N551	lymph	366	2	0.00546448
VHL	L158	kidney	1304	9	0.00690184
MYC	V7	lymph	366	4	0.010929
CTNNB1	K335	liver	636	11	0.0172956
BRAF	G469	blood	890	3	0.00337079
BRAF	G469	bowel	1782	6	0.003367
BRAF	G469	lung	2761	23	0.00833032
BRAF	G469	skin	974	13	0.013347
PDGFRA	C235	cnsbrain	2270	3	0.00132159
IRF4	Y428	skin	974	2	0.00205339
TP53	S241	bladder	958	10	0.0104384
TP53	S241	bowel	1782	9	0.00505051
TP53	S241	breast	2561	7	0.00273331
TP53	S241	esophagusstomach	1407	5	0.00355366
TP53	S241	lung	2761	16	0.005795
TP53	S241	ovaryfallopiantube	699	8	0.0114449
TP53	S241	pancreas	1059	5	0.00472144
TP53	S241	uterus	618	6	0.00970874
ERBB2	V777	bowel	1782	5	0.00280584
ERBB2	V777	breast	2561	6	0.00234283
ERBB2	V777	esophagusstomach	1407	5	0.00355366
NRAS	G12	blood	890	11	0.0123596
NRAS	G12	bowel	1782	30	0.016835
NRAS	G12	headandneck	988	3	0.00303644
NRAS	G12	skin	974	11	0.0112936
NRAS	G12	testis	217	4	0.0184332
NRAS	G12	uterus	618	4	0.00647249
PIK3CA	N1044	breast	2561	5	0.00195236
ASXL2	M1	bowel	1782	3	0.0016835
WHSC1	T1150	lymph	366	2	0.00546448
DICER1	E1813	uterus	618	3	0.00485437
NFE2L2	G81	esophagusstomach	1407	3	0.0021322
NFE2L2	G81	kidney	1304	4	0.00306748
NFE2L2	G81	lung	2761	5	0.00181094
SMAD4	E330	bowel	1782	4	0.00224467
SOCS1	A3	lymph	366	6	0.0163934
PTEN	Y68	bowel	1782	4	0.00224467
NUP93	Q15	bladder	958	5	0.00521921
NUP93	Q15	thyroid	618	4	0.00647249
TP53	E286	bowel	1782	5	0.00280584
TP53	E286	breast	2561	9	0.00351425
TP53	E286	esophagusstomach	1407	6	0.00426439
TP53	E286	lung	2761	12	0.00434625
TP53	E286	skin	974	10	0.0102669
HRAS	K117	bladder	958	4	0.00417537
HRAS	K117	thymus	162	3	0.0185185
EGFR	G598	cnsbrain	2270	31	0.0136564
GNAQ	T96	kidney	1304	2	0.00153374
GNAQ	T96	lymph	366	2	0.00546448
PTPN11	E76	cnsbrain	2270	7	0.0030837
CDKN2A	Q50	pancreas	1059	4	0.00377715
CDKN2A	Q50	skin	974	13	0.013347
TP53	R213	bladder	958	12	0.0125261
TP53	R213	bowel	1782	48	0.026936
TP53	R213	breast	2561	20	0.00780945
TP53	R213	cnsbrain	2270	10	0.00440529
TP53	R213	esophagusstomach	1407	31	0.0220327
TP53	R213	headandneck	988	19	0.0192308
TP53	R213	kidney	1304	8	0.00613497
TP53	R213	lung	2761	22	0.00796813
TP53	R213	ovaryfallopiantube	699	7	0.0100143
TP53	R213	pancreas	1059	17	0.0160529
TP53	R213	prostate	1379	7	0.00507614
TP53	R213	skin	974	18	0.0184805
TP53	R213	softtissue	739	7	0.00947226
TP53	R213	uterus	618	10	0.0161812
EGFR	L858	lung	2761	143	0.0517928
KIT	V560	softtissue	739	4	0.00541272
PRDM14	F204	skin	974	5	0.00513347
TP53	R196	bowel	1782	25	0.0140292
TP53	R196	breast	2561	17	0.00663803
TP53	R196	cnsbrain	2270	13	0.00572687
TP53	R196	esophagusstomach	1407	21	0.0149254
TP53	R196	headandneck	988	17	0.0172065
TP53	R196	lung	2761	10	0.00362188
TP53	R196	ovaryfallopiantube	699	6	0.00858369
TP53	R196	pancreas	1059	13	0.0122757
TP53	R196	skin	974	8	0.00821355
MTOR	C1483	kidney	1304	4	0.00306748
SDHA	L639	lymph	366	6	0.0163934
PPP6C	R264	skin	974	17	0.0174538
PIK3CA	R38	bowel	1782	7	0.00392817
PIK3CA	R38	uterus	618	7	0.0113269
TP53	M246	cnsbrain	2270	5	0.00220264
TP53	M246	lung	2761	10	0.00362188
RAC1	G12	testis	217	4	0.0184332
TP53	E271	bladder	958	18	0.0187891
CTCF	H284	breast	2561	6	0.00234283
PIK3CA	M1	cnsbrain	2270	5	0.00220264
PIK3CA	E453	bladder	958	8	0.00835073
PIK3CA	E453	breast	2561	16	0.00624756
PIK3CA	E453	cnsbrain	2270	6	0.00264317
ESR1	Y537	breast	2561	39	0.0152284
ESR1	Y537	uterus	618	7	0.0113269
SF3B1	D894	blood	890	3	0.00337079
KNSTRN	V12	esophagusstomach	1407	4	0.00284293
CDKN2A	P114	headandneck	988	4	0.00404858
CDKN2A	P114	skin	974	20	0.0205339
ERRFI1	K409	bowel	1782	3	0.0016835
PIK3CA	R93	esophagusstomach	1407	5	0.00355366
PIK3CA	R93	uterus	618	11	0.0177994
PPP2R1A	P179	uterus	618	27	0.0436893
B2M	M1	esophagusstomach	1407	3	0.0021322
B2M	M1	headandneck	988	3	0.00303644
B2M	M1	lung	2761	10	0.00362188
B2M	M1	lymph	366	11	0.0300546
B2M	M1	ovaryfallopiantube	699	3	0.00429185
B2M	M1	skin	974	3	0.00308008
B2M	M1	uterus	618	3	0.00485437
NSD1	C1710	headandneck	988	3	0.00303644
BRAF	L597	skin	974	6	0.00616016
EGFR	A750	lung	2761	4	0.00144875
CUL3	M299	prostate	1379	3	0.00217549
SMAD2	P305	bowel	1782	3	0.0016835
HNF1A	R114	uterus	618	3	0.00485437
PIK3R2	G373	uterus	618	3	0.00485437
MAP2K1	G128	bowel	1782	4	0.00224467
MYC	S161	bowel	1782	3	0.0016835
PIK3CA	C901	uterus	618	4	0.00647249
SMO	W535	cnsbrain	2270	3	0.00132159
SMAD4	R361	biliarytract	358	7	0.0195531
SMAD4	R361	bowel	1782	59	0.0331089
SMAD4	R361	breast	2561	4	0.00156189
SMAD4	R361	esophagusstomach	1407	17	0.0120824
SMAD4	R361	lung	2761	5	0.00181094
SMAD4	R361	pancreas	1059	22	0.0207743
EGFR	R108	cnsbrain	2270	18	0.00792952
TP53	H178	uterus	618	3	0.00485437
TP53	P278	bladder	958	7	0.00730689
TP53	P278	bowel	1782	10	0.00561167
TP53	P278	breast	2561	7	0.00273331
TP53	P278	esophagusstomach	1407	9	0.00639659
TP53	P278	headandneck	988	9	0.00910931
TP53	P278	lung	2761	18	0.00651938
TP53	P278	ovaryfallopiantube	699	8	0.0114449
TP53	P278	skin	974	12	0.0123203
HGF	G229	cervix	239	2	0.0083682
APC	Q1429	bowel	1782	22	0.0123457
FGFR4	V550	breast	2561	6	0.00234283
FGFR4	V550	softtissue	739	4	0.00541272
PPP6C	S270	skin	974	6	0.00616016
SF3B1	G742	blood	890	5	0.00561798
NFE2L2	W24	lung	2761	3	0.00108656
CCND3	I290	lymph	366	4	0.010929
ERBB3	R103	bladder	958	3	0.00313152
MET	D1010	lung	2761	13	0.00470844
CTCF	H288	breast	2561	3	0.00117142
MAP2K4	S184	breast	2561	6	0.00234283
PAX5	V26	bowel	1782	3	0.0016835
PAX5	V26	esophagusstomach	1407	3	0.0021322
INPPL1	A1185	adrenalgland	291	4	0.0137457
DIS3	R780	blood	890	4	0.00449438
ATM	N2875	prostate	1379	3	0.00217549
GTF2I	N440	bladder	958	2	0.00208768
GTF2I	N440	esophagusstomach	1407	9	0.00639659
GTF2I	N440	softtissue	739	4	0.00541272
EP300	C1164	bladder	958	3	0.00313152
ERBB3	M91	bladder	958	9	0.00939457
IL7R	I241	lung	2761	5	0.00181094
CD79B	Y196	lymph	366	16	0.0437158
EGFR	L747	lung	2761	8	0.0028975
PIK3CB	R321	bowel	1782	5	0.00280584
CREBBP	W1502	lymph	366	3	0.00819672
TP53	K164	lung	2761	5	0.00181094
EZH2	K510	testis	217	3	0.0138249
STK11	H174	kidney	1304	3	0.00230061
PPP4R2	*1	skin	974	2	0.00205339
PIK3CA	T1025	uterus	618	4	0.00647249
FGFR3	R248	bladder	958	25	0.026096
KEAP1	M110	lung	2761	6	0.00217313
SOX17	A96	uterus	618	3	0.00485437
FOXA1	S242	breast	2561	5	0.00195236
KEAP1	G480	lung	2761	8	0.0028975
MEF2B	K4	lymph	366	4	0.010929
CDKN2A	D108	bladder	958	12	0.0125261
CDKN2A	D108	headandneck	988	4	0.00404858
CDKN2A	D108	lung	2761	10	0.00362188
EP300	Q1455	bladder	958	6	0.00626305
ERBB2	L869	breast	2561	4	0.00156189
PTPRT	L668	esophagusstomach	1407	5	0.00355366
TP53	V216	breast	2561	6	0.00234283
TP53	V216	cnsbrain	2270	5	0.00220264
EP300	W1466	bowel	1782	4	0.00224467
MET	F1200	kidney	1304	4	0.00306748
ERBB3	E928	breast	2561	8	0.00312378
SF3B1	K700	biliarytract	358	2	0.00558659
SF3B1	K700	blood	890	15	0.0168539
SF3B1	K700	breast	2561	28	0.0109332
SF3B1	K700	pancreas	1059	5	0.00472144
CIC	R1515	cnsbrain	2270	9	0.00396476
TNFRSF14	M1	lymph	366	4	0.010929
CARD11	E93	lymph	366	3	0.00819672
POLE	P286	bowel	1782	9	0.00505051
POLE	P286	uterus	618	11	0.0177994
CIC	R215	cnsbrain	2270	22	0.00969163
CTNNB1	H36	liver	636	7	0.0110063
ARAF	S214	lung	2761	5	0.00181094
CDH1	D254	esophagusstomach	1407	9	0.00639659
FBXW7	R505	bladder	958	10	0.0104384
FBXW7	R505	bowel	1782	23	0.0129068
FBXW7	R505	cervix	239	4	0.0167364
FBXW7	R505	esophagusstomach	1407	7	0.00497512
FBXW7	R505	headandneck	988	9	0.00910931
FBXW7	R505	lung	2761	5	0.00181094
FBXW7	R505	uterus	618	14	0.0226537
VHL	C162	kidney	1304	7	0.0053681
TP53	H193	bladder	958	6	0.00626305
TP53	H193	breast	2561	18	0.0070285
TP53	H193	cnsbrain	2270	14	0.0061674
TP53	H193	esophagusstomach	1407	9	0.00639659
TP53	H193	headandneck	988	10	0.0101215
TP53	H193	liver	636	6	0.00943396
TP53	H193	lung	2761	18	0.00651938
TP53	H193	ovaryfallopiantube	699	9	0.0128755
TP53	H193	pancreas	1059	7	0.00661001
TP53	H193	uterus	618	7	0.0113269
CCND1	T286	uterus	618	6	0.00970874
EGFR	R252	cnsbrain	2270	12	0.00528634
SUZ12	R101	prostate	1379	4	0.00290065
PIK3CD	E1021	lymph	366	4	0.010929
ERBB2	V842	bowel	1782	8	0.00448934
ERBB2	V842	pancreas	1059	3	0.00283286
ERBB2	V842	uterus	618	7	0.0113269
MTOR	T1977	kidney	1304	6	0.00460123
PTPN11	F285	cnsbrain	2270	3	0.00132159
TP53	V274	bowel	1782	4	0.00224467
TP53	V274	breast	2561	8	0.00312378
TP53	V274	lung	2761	11	0.00398406
TP53	V274	pancreas	1059	4	0.00377715
TNFRSF14	C111	bladder	958	2	0.00208768
SPOP	M117	uterus	618	6	0.00970874
IL7R	K395	esophagusstomach	1407	6	0.00426439
CDKN2A	H83	biliarytract	358	3	0.00837989
CDKN2A	H83	bladder	958	4	0.00417537
CDKN2A	H83	breast	2561	3	0.00117142
CDKN2A	H83	esophagusstomach	1407	6	0.00426439
CDKN2A	H83	headandneck	988	4	0.00404858
CDKN2A	H83	lung	2761	12	0.00434625
CDKN2A	H83	pancreas	1059	12	0.0113314
CDKN2A	H83	skin	974	7	0.00718686
NRAS	G13	blood	890	13	0.0146067
NRAS	G13	bowel	1782	10	0.00561167
NRAS	G13	skin	974	7	0.00718686
ERBB2	R103	bladder	958	5	0.00521921
SPOP	F125	prostate	1379	6	0.00435098
TP53	R280	bladder	958	33	0.0344468
TP53	R280	breast	2561	10	0.00390472
TP53	R280	headandneck	988	9	0.00910931
TP53	R280	lung	2761	20	0.00724375
STK19	D89	skin	974	18	0.0184805
BRD4	P1065	skin	974	3	0.00308008
TP53	P190	bowel	1782	6	0.003367
MYC	P74	lung	2761	4	0.00144875
SMARCB1	R377	esophagusstomach	1407	4	0.00284293
MAP3K1	L380	breast	2561	3	0.00117142
PIK3CA	K111	bowel	1782	6	0.003367
PIK3CA	K111	breast	2561	8	0.00312378
PIK3CA	K111	cnsbrain	2270	4	0.00176211
PIK3CA	K111	esophagusstomach	1407	5	0.00355366
PIK3CA	K111	uterus	618	8	0.012945
TP53	A159	bladder	958	5	0.00521921
TP53	A159	lung	2761	20	0.00724375
TP53	N131	lung	2761	6	0.00217313
EGFR	T790	lung	2761	59	0.0213691
PIK3R1	K379	cnsbrain	2270	3	0.00132159
KEAP1	R601	lung	2761	6	0.00217313
BRAF	G466	blood	890	4	0.00449438
BRAF	G466	bowel	1782	3	0.0016835
BRAF	G466	lung	2761	17	0.00615719
FBXW7	R689	bowel	1782	6	0.003367
FBXW7	R689	uterus	618	6	0.00970874
TP53	H168	bowel	1782	5	0.00280584
EP300	D1399	cervix	239	5	0.0209205
EP300	D1399	esophagusstomach	1407	3	0.0021322
EP300	D1399	headandneck	988	6	0.00607287
TP53	R248	bladder	958	42	0.0438413
TP53	R248	bowel	1782	98	0.0549944
TP53	R248	breast	2561	34	0.0132761
TP53	R248	cnsbrain	2270	54	0.0237885
TP53	R248	esophagusstomach	1407	70	0.0497512
TP53	R248	headandneck	988	28	0.0283401
TP53	R248	lung	2761	51	0.0184716
TP53	R248	lymph	366	6	0.0163934
TP53	R248	ovaryfallopiantube	699	32	0.0457797
TP53	R248	pancreas	1059	32	0.0302172
TP53	R248	prostate	1379	17	0.0123278
TP53	R248	skin	974	27	0.0277207
TP53	R248	softtissue	739	8	0.0108254
TP53	R248	uterus	618	33	0.0533981
RAD51C	P21	breast	2561	3	0.00117142
FBXW7	R465	bladder	958	7	0.00730689
FBXW7	R465	bowel	1782	53	0.0297419
FBXW7	R465	cervix	239	5	0.0209205
FBXW7	R465	cnsbrain	2270	4	0.00176211
FBXW7	R465	esophagusstomach	1407	15	0.010661
FBXW7	R465	lung	2761	6	0.00217313
FBXW7	R465	uterus	618	25	0.0404531
TP53	R273	bladder	958	11	0.0114823
TP53	R273	blood	890	5	0.00561798
TP53	R273	bowel	1782	105	0.0589226
TP53	R273	breast	2561	43	0.0167903
TP53	R273	cnsbrain	2270	113	0.0497797
TP53	R273	esophagusstomach	1407	74	0.0525942
TP53	R273	headandneck	988	29	0.0293522
TP53	R273	kidney	1304	7	0.0053681
TP53	R273	lung	2761	78	0.0282506
TP53	R273	ovaryfallopiantube	699	37	0.0529328
TP53	R273	pancreas	1059	27	0.0254958
TP53	R273	prostate	1379	18	0.0130529
TP53	R273	uterus	618	30	0.0485437
ERCC2	S246	bladder	958	6	0.00626305
CDKN2A	D84	esophagusstomach	1407	5	0.00355366
CDKN2A	D84	lung	2761	7	0.00253531
EGFR	R222	cnsbrain	2270	13	0.00572687
SMAD4	G419	bowel	1782	7	0.00392817
TP53	M237	bowel	1782	8	0.00448934
TP53	M237	cnsbrain	2270	9	0.00396476
TP53	M237	esophagusstomach	1407	11	0.00781805
TP53	M237	headandneck	988	4	0.00404858
TP53	M237	lung	2761	12	0.00434625
TP53	M237	ovaryfallopiantube	699	5	0.00715308
TP53	M237	uterus	618	3	0.00485437
FOXA1	M253	prostate	1379	6	0.00435098
FGFR3	Y373	bladder	958	31	0.0323591
CTNNB1	S45	adrenalgland	291	6	0.0206186
CTNNB1	S45	biliarytract	358	4	0.0111732
CTNNB1	S45	bladder	958	6	0.00626305
CTNNB1	S45	bowel	1782	9	0.00505051
CTNNB1	S45	liver	636	13	0.0204403
CTNNB1	S45	lung	2761	5	0.00181094
CTNNB1	S45	pancreas	1059	4	0.00377715
CTNNB1	S45	prostate	1379	6	0.00435098
CTNNB1	S45	skin	974	8	0.00821355
FLT3	D835	blood	890	17	0.0191011
MTOR	V2006	kidney	1304	3	0.00230061
STAT3	S614	lymph	366	4	0.010929
PIK3CA	G118	breast	2561	9	0.00351425
PIK3CA	G118	cnsbrain	2270	8	0.00352423
PIK3CA	G118	uterus	618	8	0.012945
PIK3CB	D1067	kidney	1304	3	0.00230061
PIK3CB	D1067	skin	974	3	0.00308008
EP300	Y1467	lymph	366	3	0.00819672
PIK3CA	R88	bowel	1782	20	0.0112233
PIK3CA	R88	breast	2561	5	0.00195236
PIK3CA	R88	cnsbrain	2270	10	0.00440529
PIK3CA	R88	esophagusstomach	1407	6	0.00426439
PIK3CA	R88	uterus	618	23	0.0372168
ERCC2	T484	bladder	958	7	0.00730689
CIC	S231	cnsbrain	2270	4	0.00176211
ARID2	S297	skin	974	15	0.0154004
RHOA	R5	esophagusstomach	1407	8	0.00568586
RHOA	R5	lymph	366	6	0.0163934
FBXW7	G423	uterus	618	5	0.00809061
CDKN2A	P48	skin	974	6	0.00616016
SRSF2	P95	blood	890	3	0.00337079
PTPRT	E548	skin	974	11	0.0112936
GATA3	R364	breast	2561	5	0.00195236
FOXA1	H247	breast	2561	3	0.00117142
FOXA1	H247	prostate	1379	7	0.00507614
PTEN	C71	cnsbrain	2270	5	0.00220264
MTOR	F1888	kidney	1304	5	0.00383436
NFE2L2	R34	bladder	958	8	0.00835073
NFE2L2	R34	headandneck	988	7	0.00708502
NFE2L2	R34	lung	2761	12	0.00434625
SESN2	I425	bladder	958	2	0.00208768
FGFR1	K656	cnsbrain	2270	6	0.00264317
FGFR1	N546	adrenalgland	291	2	0.00687285
FGFR1	N546	cnsbrain	2270	11	0.00484581
FGFR1	N546	softtissue	739	3	0.00405954
VHL	S65	kidney	1304	15	0.0115031
PTEN	A126	breast	2561	4	0.00156189
ERCC2	N238	bladder	958	14	0.0146138
CARD11	R423	bowel	1782	5	0.00280584
RHOA	Y34	esophagusstomach	1407	4	0.00284293
TP53	P151	bladder	958	4	0.00417537
TP53	P151	bowel	1782	12	0.00673401
TP53	P151	breast	2561	6	0.00234283
TP53	P151	esophagusstomach	1407	5	0.00355366
TP53	P151	headandneck	988	8	0.00809717
TP53	P151	ovaryfallopiantube	699	5	0.00715308
TP53	P151	pancreas	1059	6	0.00566572
TP53	P151	skin	974	5	0.00513347
PIK3CA	E81	breast	2561	7	0.00273331
ERBB4	K1002	esophagusstomach	1407	5	0.00355366
CIC	W238	cnsbrain	2270	3	0.00132159
HIST1H1C	E115	breast	2561	4	0.00156189
CTNNB1	S33	bladder	958	5	0.00521921
CTNNB1	S33	cnsbrain	2270	8	0.00352423
CTNNB1	S33	esophagusstomach	1407	5	0.00355366
CTNNB1	S33	liver	636	23	0.0361635
CTNNB1	S33	lung	2761	11	0.00398406
CTNNB1	S33	ovaryfallopiantube	699	3	0.00429185
CTNNB1	S33	prostate	1379	8	0.00580131
CTNNB1	S33	uterus	618	24	0.038835
PIK3CD	C416	testis	217	2	0.00921659
ERBB3	S846	bowel	1782	3	0.0016835
ERBB3	S846	esophagusstomach	1407	3	0.0021322
RHOA	G62	esophagusstomach	1407	4	0.00284293
FOXL2	C134	ovaryfallopiantube	699	12	0.0171674
TP63	R379	skin	974	14	0.0143737
DICER1	D1810	uterus	618	4	0.00647249
PIK3R1	D560	cnsbrain	2270	3	0.00132159
CDKN2A	E88	headandneck	988	7	0.00708502
CDKN2A	E88	skin	974	10	0.0102669
PIK3CA	N345	bowel	1782	9	0.00505051
PIK3CA	N345	breast	2561	51	0.0199141
PIK3CA	N345	cnsbrain	2270	3	0.00132159
PIK3CA	N345	esophagusstomach	1407	5	0.00355366
PIK3CA	N345	headandneck	988	4	0.00404858
PIK3CA	N345	lung	2761	7	0.00253531
PIK3CA	N345	prostate	1379	3	0.00217549
PIK3CA	N345	softtissue	739	2	0.00270636
PIK3CA	N345	uterus	618	11	0.0177994
TP53	Y220	bladder	958	3	0.00313152
TP53	Y220	bowel	1782	7	0.00392817
TP53	Y220	breast	2561	18	0.0070285
TP53	Y220	cnsbrain	2270	22	0.00969163
TP53	Y220	esophagusstomach	1407	11	0.00781805
TP53	Y220	headandneck	988	12	0.0121457
TP53	Y220	liver	636	7	0.0110063
TP53	Y220	lung	2761	20	0.00724375
TP53	Y220	ovaryfallopiantube	699	20	0.0286123
TP53	Y220	pancreas	1059	11	0.0103872
TP53	Y220	prostate	1379	4	0.00290065
TP53	Y220	softtissue	739	6	0.00811908
TP53	Y220	uterus	618	6	0.00970874
STK11	E165	lung	2761	6	0.00217313
FOXA1	S250	breast	2561	6	0.00234283
TP53	L257	bowel	1782	6	0.003367
ACVR1	R206	uterus	618	6	0.00970874
TP53	E285	bladder	958	33	0.0344468
TP53	E285	esophagusstomach	1407	8	0.00568586
TP53	E285	lung	2761	15	0.00543281
TP53	F109	skin	974	4	0.00410678
STK11	D194	lung	2761	11	0.00398406
FOXO1	S205	lymph	366	4	0.010929
PTPN11	E69	cnsbrain	2270	6	0.00264317
TP53	S127	bowel	1782	8	0.00448934
CTNNB1	G34	adrenalgland	291	3	0.0103093
CTNNB1	G34	cnsbrain	2270	4	0.00176211
CTNNB1	G34	liver	636	9	0.0141509
CTNNB1	G34	lung	2761	8	0.0028975
CTNNB1	G34	uterus	618	15	0.0242718
FGFR3	G370	bladder	958	8	0.00835073
TP53	Q136	breast	2561	6	0.00234283
TP53	Q136	cnsbrain	2270	5	0.00220264
TP53	Q136	headandneck	988	6	0.00607287
CIC	R202	cnsbrain	2270	11	0.00484581
FBXW7	T532	bladder	958	3	0.00313152
PIK3R1	G376	cnsbrain	2270	12	0.00528634
FOXP1	S448	skin	974	5	0.00513347
TP53	I195	blood	890	4	0.00449438
TP53	I195	bowel	1782	4	0.00224467
TP53	I195	breast	2561	16	0.00624756
TP53	I195	cnsbrain	2270	6	0.00264317
TP53	I195	esophagusstomach	1407	7	0.00497512
TP53	I195	headandneck	988	4	0.00404858
TP53	I195	lung	2761	9	0.00325969
TP53	I195	ovaryfallopiantube	699	13	0.018598
TP53	I195	pancreas	1059	7	0.00661001
H3F3A	K28	cnsbrain	2270	32	0.0140969
PIK3CA	R357	bowel	1782	5	0.00280584
TP53	G245	bladder	958	9	0.00939457
TP53	G245	bowel	1782	49	0.0274972
TP53	G245	breast	2561	13	0.00507614
TP53	G245	cnsbrain	2270	17	0.00748899
TP53	G245	esophagusstomach	1407	25	0.0177683
TP53	G245	headandneck	988	19	0.0192308
TP53	G245	lung	2761	40	0.0144875
TP53	G245	ovaryfallopiantube	699	15	0.0214592
TP53	G245	pancreas	1059	15	0.0141643
TP53	G245	prostate	1379	14	0.0101523
TP53	G245	uterus	618	7	0.0113269
CARD11	L251	lymph	366	3	0.00819672
TP53	V272	bowel	1782	6	0.003367
TP53	V272	breast	2561	7	0.00273331
TP53	V272	esophagusstomach	1407	5	0.00355366
TP53	V272	headandneck	988	4	0.00404858
TP53	V272	lung	2761	12	0.00434625
TP53	V272	ovaryfallopiantube	699	7	0.0100143
TP53	V272	pancreas	1059	8	0.0075543
VHL	S80	kidney	1304	10	0.00766871
TP53	R267	lung	2761	10	0.00362188
HRAS	G12	bladder	958	10	0.0104384
HRAS	G12	headandneck	988	18	0.0182186
HRAS	G12	skin	974	5	0.00513347
ALK	F1174	cnsbrain	2270	12	0.00528634
KEAP1	R272	lung	2761	7	0.00253531
GNAQ	G48	eye	128	3	0.0234375
DIS3	D479	lung	2761	4	0.00144875
TP53	R282	bladder	958	8	0.00835073
TP53	R282	bowel	1782	60	0.03367
TP53	R282	cnsbrain	2270	21	0.0092511
TP53	R282	esophagusstomach	1407	34	0.0241649
TP53	R282	headandneck	988	18	0.0182186
TP53	R282	lung	2761	14	0.00507063
TP53	R282	ovaryfallopiantube	699	8	0.0114449
TP53	R282	pancreas	1059	22	0.0207743
TP53	R282	prostate	1379	8	0.00580131
TP53	R282	skin	974	8	0.00821355
CIC	R1512	cnsbrain	2270	9	0.00396476
RRAS2	Q72	lung	2761	3	0.00108656
RRAS2	Q72	uterus	618	4	0.00647249
CTNNB1	W383	bowel	1782	3	0.0016835
ERBB2	D277	bladder	958	6	0.00626305
RAD50	D69	lung	2761	4	0.00144875
FBXW7	S582	bowel	1782	10	0.00561167
ARID1B	G953	pancreas	1059	3	0.00283286
DNMT3A	R882	blood	890	30	0.0337079
DNMT3A	R882	lymph	366	4	0.010929
SF3B1	R625	bowel	1782	10	0.00561167
SF3B1	R625	eye	128	27	0.210938
SF3B1	R625	headandneck	988	3	0.00303644
SF3B1	R625	skin	974	7	0.00718686
SF3B1	R625	vulvavagina	16	3	0.1875
FGFR2	R203	bowel	1782	6	0.003367
BRAF	K601	lung	2761	6	0.00217313
BRAF	K601	lymph	366	4	0.010929
BRAF	K601	prostate	1379	6	0.00435098
BRAF	K601	skin	974	8	0.00821355
BRAF	K601	thyroid	618	2	0.00323625
FOXO1	S22	lymph	366	4	0.010929
HNF1A	S591	esophagusstomach	1407	3	0.0021322
PDGFRA	D842	cnsbrain	2270	3	0.00132159
PDGFRA	D842	softtissue	739	8	0.0108254
ERBB3	A232	bowel	1782	5	0.00280584
HNF1A	I27	lymph	366	2	0.00546448
GNAQ	Q209	eye	128	57	0.445312
GNAQ	Q209	skin	974	6	0.00616016
FGFR4	N535	breast	2561	3	0.00117142
SMARCA4	M781	cnsbrain	2270	3	0.00132159
SMARCA4	M781	esophagusstomach	1407	3	0.0021322
VHL	L89	kidney	1304	13	0.00996933
TP53	D208	breast	2561	4	0.00156189
PIK3CD	R894	esophagusstomach	1407	3	0.0021322
GNAS	Q227	lung	2761	6	0.00217313
ERBB3	E332	bladder	958	10	0.0104384
CCND1	C47	lymph	366	3	0.00819672
PIK3CA	E542	biliarytract	358	3	0.00837989
PIK3CA	E542	bladder	958	46	0.0480167
PIK3CA	E542	bowel	1782	45	0.0252525
PIK3CA	E542	breast	2561	112	0.0437329
PIK3CA	E542	cervix	239	16	0.0669456
PIK3CA	E542	cnsbrain	2270	10	0.00440529
PIK3CA	E542	esophagusstomach	1407	16	0.0113717
PIK3CA	E542	headandneck	988	31	0.0313765
PIK3CA	E542	kidney	1304	8	0.00613497
PIK3CA	E542	lung	2761	32	0.01159
PIK3CA	E542	prostate	1379	5	0.00362582
PIK3CA	E542	softtissue	739	3	0.00405954
PIK3CA	E542	testis	217	2	0.00921659
PIK3CA	E542	uterus	618	22	0.0355987
CDH1	R335	breast	2561	5	0.00195236
FBXW7	S546	bladder	958	6	0.00626305
FGFR3	S371	bladder	958	5	0.00521921
TP53	N239	breast	2561	6	0.00234283
TP53	N239	headandneck	988	3	0.00303644
TP53	N239	lung	2761	7	0.00253531
TP53	N239	uterus	618	7	0.0113269
ERBB2	D769	breast	2561	5	0.00195236
ERBB2	D769	esophagusstomach	1407	7	0.00497512
CTNNB1	R535	esophagusstomach	1407	4	0.00284293
SPOP	F133	prostate	1379	67	0.0485859
ARID1B	Q1166	skin	974	4	0.00410678
EPHB1	R743	skin	974	6	0.00616016
RHEB	Y35	kidney	1304	4	0.00306748
RHEB	Y35	testis	217	2	0.00921659
RHEB	Y35	uterus	618	3	0.00485437
ARID2	R314	skin	974	6	0.00616016
IRS2	G1057	lymph	366	2	0.00546448
PTEN	C105	skin	974	3	0.00308008
PIM1	S97	lymph	366	9	0.0245902
MET	M1250	kidney	1304	5	0.00383436
MAP2K1	P124	skin	974	20	0.0205339
TP53	A161	bladder	958	6	0.00626305
RET	M918	adrenalgland	291	4	0.0137457
RET	M918	thyroid	618	6	0.00970874
SMO	L412	cnsbrain	2270	5	0.00220264
KRAS	Q61	biliarytract	358	8	0.0223464
KRAS	Q61	bladder	958	5	0.00521921
KRAS	Q61	blood	890	17	0.0191011
KRAS	Q61	bowel	1782	31	0.0173962
KRAS	Q61	esophagusstomach	1407	5	0.00355366
KRAS	Q61	lung	2761	28	0.0101413
KRAS	Q61	pancreas	1059	64	0.0604344
KRAS	Q61	prostate	1379	4	0.00290065
KRAS	Q61	testis	217	6	0.0276498
KRAS	Q61	thyroid	618	8	0.012945
KRAS	Q61	uterus	618	4	0.00647249
GATA3	R366	breast	2561	4	0.00156189
ARAF	P216	biliarytract	358	3	0.00837989
KRAS	A11	lung	2761	4	0.00144875
MED12	G44	bowel	1782	4	0.00224467
MED12	G44	uterus	618	8	0.012945
PMS2	K651	testis	217	2	0.00921659
RHOA	A161	bladder	958	6	0.00626305
PIK3R1	K567	bowel	1782	4	0.00224467
PIK3R1	K567	uterus	618	4	0.00647249
PTEN	C124	breast	2561	4	0.00156189
CDH1	Y190	esophagusstomach	1407	3	0.0021322
KRAS	Q22	bowel	1782	3	0.0016835
NF1	R440	skin	974	10	0.0102669
PDPK1	P499	skin	974	5	0.00513347
EZH2	K660	lymph	366	2	0.00546448
KRAS	A146	blood	890	6	0.00674157
KRAS	A146	bowel	1782	56	0.0314254
KRAS	A146	esophagusstomach	1407	6	0.00426439
KRAS	A146	lung	2761	5	0.00181094
KRAS	A146	testis	217	5	0.0230415
MAP2K1	F53	bladder	958	3	0.00313152
MAP2K1	F53	bowel	1782	3	0.0016835
TP53	V157	breast	2561	5	0.00195236
TP53	V157	headandneck	988	6	0.00607287
TP53	V157	lung	2761	36	0.0130388
TP53	V157	ovaryfallopiantube	699	9	0.0128755
SMARCA4	R1192	cnsbrain	2270	4	0.00176211
BRCA2	S2303	skin	974	5	0.00513347
TP53	R175	bladder	958	11	0.0114823
TP53	R175	bowel	1782	108	0.0606061
TP53	R175	breast	2561	29	0.0113237
TP53	R175	cnsbrain	2270	33	0.0145374
TP53	R175	esophagusstomach	1407	63	0.0447761
TP53	R175	headandneck	988	24	0.0242915
TP53	R175	lung	2761	28	0.0101413
TP53	R175	ovaryfallopiantube	699	21	0.0300429
TP53	R175	pancreas	1059	39	0.0368272
TP53	R175	prostate	1379	14	0.0101523
TP53	R175	softtissue	739	12	0.0162382
TP53	R175	uterus	618	14	0.0226537
SPRED1	R349	bladder	958	2	0.00208768
PIK3CA	Y1021	bowel	1782	4	0.00224467
PIK3CA	Y1021	uterus	618	4	0.00647249
RHOA	L57	esophagusstomach	1407	5	0.00355366
ERBB4	L798	esophagusstomach	1407	8	0.00568586
GTF2I	L424	thymus	162	68	0.419753
NFE2L2	D29	headandneck	988	6	0.00607287
NFE2L2	D29	kidney	1304	3	0.00230061
NFE2L2	D29	lung	2761	10	0.00362188
PIK3CA	M1043	bowel	1782	7	0.00392817
PIK3CA	M1043	breast	2561	11	0.0042952
PIK3CA	M1043	cnsbrain	2270	11	0.00484581
PIK3CA	M1043	headandneck	988	4	0.00404858
PIK3CA	M1043	thyroid	618	3	0.00485437
PIK3CA	M1043	uterus	618	13	0.0210356
PGR	R836	skin	974	5	0.00513347
BRAF	L485	bladder	958	2	0.00208768
KIT	Y823	softtissue	739	3	0.00405954
KIT	Y823	testis	217	2	0.00921659
AR	L701	prostate	1379	18	0.0130529
CBFB	M1	breast	2561	4	0.00156189
TP53	Q331	lung	2761	12	0.00434625
TRAF7	R189	lung	2761	3	0.00108656
EGFR	T363	cnsbrain	2270	5	0.00220264
TP53	I255	breast	2561	6	0.00234283
RNF43	H86	esophagusstomach	1407	4	0.00284293
U2AF1	S34	bladder	958	9	0.00939457
U2AF1	S34	blood	890	8	0.00898876
U2AF1	S34	lung	2761	41	0.0148497
U2AF1	S34	pancreas	1059	9	0.00849858
U2AF1	S34	uterus	618	7	0.0113269
MAP2K1	K57	bowel	1782	5	0.00280584
MAP2K1	K57	lung	2761	7	0.00253531
MAP2K1	K57	lymph	366	4	0.010929
TP53	Y107	breast	2561	5	0.00195236
ERBB4	F1102	esophagusstomach	1407	3	0.0021322
MED12	L1224	prostate	1379	14	0.0101523
ERBB3	D297	bladder	958	6	0.00626305
ERBB3	D297	esophagusstomach	1407	5	0.00355366
ERBB3	D297	uterus	618	4	0.00647249
BCL2	A131	lymph	366	9	0.0245902
MAP2K1	E203	skin	974	6	0.00616016
HNF1A	G338	prostate	1379	3	0.00217549
TP53	T125	bowel	1782	9	0.00505051
TP53	F134	esophagusstomach	1407	4	0.00284293
TP53	F134	lung	2761	4	0.00144875
TP53	F134	skin	974	3	0.00308008
SMAD4	D537	bowel	1782	19	0.0106622
SMAD4	D537	pancreas	1059	5	0.00472144
ERCC2	E606	bladder	958	5	0.00521921
PIK3CA	C420	bowel	1782	7	0.00392817
PIK3CA	C420	breast	2561	15	0.00585709
PIK3CA	C420	cnsbrain	2270	3	0.00132159
PIK3CA	C420	headandneck	988	4	0.00404858
PIK3CA	C420	lung	2761	5	0.00181094
PIK3CA	C420	uterus	618	4	0.00647249
KEAP1	R470	lung	2761	7	0.00253531
RHOA	E40	headandneck	988	6	0.00607287
CARD11	R337	lymph	366	3	0.00819672
TP53	N247	skin	974	7	0.00718686
PIM1	E79	lymph	366	6	0.0163934
TP53	F270	breast	2561	8	0.00312378
TP53	F270	lung	2761	7	0.00253531
PREX2	L50	esophagusstomach	1407	7	0.00497512
TP53	P152	bowel	1782	10	0.00561167
ESR1	L536	breast	2561	12	0.00468567
ESR1	L536	uterus	618	2	0.00323625
SDHA	V644	lymph	366	3	0.00819672
SPOP	K129	prostate	1379	3	0.00217549
ERBB2	R138	skin	974	3	0.00308008
EGFR	P596	cnsbrain	2270	6	0.00264317
GATA2	C352	lung	2761	4	0.00144875
TP53	S215	bowel	1782	6	0.003367
TP53	S215	esophagusstomach	1407	4	0.00284293
TP53	S215	lung	2761	14	0.00507063
TP53	S215	pancreas	1059	5	0.00472144
TP53	S215	prostate	1379	4	0.00290065
EGFR	T263	cnsbrain	2270	4	0.00176211
U2AF1	Q157	blood	890	4	0.00449438
BRAF	G596	lung	2761	5	0.00181094
KIT	L576	skin	974	4	0.00410678
KIT	L576	softtissue	739	6	0.00811908
SDHA	S445	lymph	366	6	0.0163934
STK11	Q220	lung	2761	7	0.00253531
TGFBR2	R528	bowel	1782	13	0.00729517
TP53	R306	bowel	1782	17	0.00953984
TP53	R306	breast	2561	10	0.00390472
TP53	R306	esophagusstomach	1407	20	0.0142146
TP53	R306	headandneck	988	7	0.00708502
RHOA	E47	bladder	958	8	0.00835073
PDGFRA	N659	cnsbrain	2270	4	0.00176211
PDGFRA	N659	softtissue	739	2	0.00270636
EP300	L415	lymph	366	2	0.00546448
TP53	H179	bowel	1782	9	0.00505051
TP53	H179	breast	2561	17	0.00663803
TP53	H179	cnsbrain	2270	16	0.00704846
TP53	H179	esophagusstomach	1407	11	0.00781805
TP53	H179	headandneck	988	13	0.0131579
TP53	H179	lung	2761	33	0.0119522
TP53	H179	ovaryfallopiantube	699	6	0.00858369
TP53	H179	pancreas	1059	13	0.0122757
TP53	H179	prostate	1379	4	0.00290065
TP53	H179	uterus	618	6	0.00970874
KEAP1	R320	lung	2761	6	0.00217313
SF3B1	K741	liver	636	3	0.00471698
RAF1	S257	bowel	1782	11	0.00617284
RAF1	S257	lung	2761	5	0.00181094
VHL	N78	kidney	1304	8	0.00613497
NFE2L2	G31	esophagusstomach	1407	4	0.00284293
NFE2L2	G31	lung	2761	8	0.0028975
CTNNB1	T41	ampullaofvater	23	2	0.0869565
CTNNB1	T41	bowel	1782	11	0.00617284
CTNNB1	T41	liver	636	15	0.0235849
CTNNB1	T41	lung	2761	5	0.00181094
CTNNB1	T41	prostate	1379	10	0.00725163
CTNNB1	T41	skin	974	6	0.00616016
CTNNB1	T41	softtissue	739	2	0.00270636
CTNNB1	T41	uterus	618	8	0.012945
TP63	E609	skin	974	9	0.00924025
EP300	Y1414	lung	2761	3	0.00108656
RUNX1	R135	blood	890	4	0.00449438
CARD11	E626	lymph	366	3	0.00819672
PTEN	R130	bowel	1782	13	0.00729517
PTEN	R130	breast	2561	14	0.00546661
PTEN	R130	cervix	239	4	0.0167364
PTEN	R130	cnsbrain	2270	14	0.0061674
PTEN	R130	headandneck	988	4	0.00404858
PTEN	R130	lung	2761	8	0.0028975
PTEN	R130	prostate	1379	8	0.00580131
PTEN	R130	skin	974	5	0.00513347
PTEN	R130	uterus	618	83	0.134304
FUBP1	R430	uterus	618	6	0.00970874
NCOA3	R80	bladder	958	3	0.00313152
SMAD4	G386	bowel	1782	6	0.003367
SMAD4	G386	esophagusstomach	1407	8	0.00568586
SMAD4	G386	pancreas	1059	5	0.00472144
ESR1	E380	breast	2561	14	0.00546661
TP53	Y163	bowel	1782	4	0.00224467
TP53	Y163	breast	2561	6	0.00234283
TP53	Y163	cnsbrain	2270	7	0.0030837
TP53	Y163	esophagusstomach	1407	4	0.00284293
TP53	Y163	headandneck	988	9	0.00910931
TP53	Y163	liver	636	4	0.00628931
TP53	Y163	lung	2761	21	0.00760594
TP53	Y163	ovaryfallopiantube	699	11	0.0157368
MAX	H28	uterus	618	5	0.00809061
ARID1A	G2087	esophagusstomach	1407	5	0.00355366
ERCC2	Y14	bladder	958	3	0.00313152
HIST1H1C	A180	bladder	958	6	0.00626305
HIST1H1C	A180	breast	2561	8	0.00312378
HIST1H1C	A180	lung	2761	5	0.00181094
ERBB3	H228	bladder	958	6	0.00626305
NRAS	G60	skin	974	3	0.00308008
PTPN11	A465	cnsbrain	2270	3	0.00132159
KNSTRN	P28	skin	974	5	0.00513347
RUNX1	R174	blood	890	5	0.00561798
PTPN11	Q514	blood	890	3	0.00337079
PTPN11	Q514	cnsbrain	2270	3	0.00132159
FGFR2	N549	bladder	958	6	0.00626305
FGFR2	N549	breast	2561	9	0.00351425
FGFR2	N549	uterus	618	6	0.00970874
ERCC2	Y24	bladder	958	5	0.00521921
IKZF1	E304	skin	974	6	0.00616016
TP53	I232	bowel	1782	4	0.00224467
TCEB1	Y79	kidney	1304	10	0.00766871
NOTCH1	E455	headandneck	988	4	0.00404858
KRAS	K117	blood	890	3	0.00337079
KRAS	K117	bowel	1782	9	0.00505051
PIM1	Q37	lymph	366	5	0.0136612
TP53	E258	bladder	958	6	0.00626305
TP53	E258	bowel	1782	5	0.00280584
TP53	E258	lung	2761	11	0.00398406
TP53	E258	pancreas	1059	7	0.00661001
ATM	R3008	bowel	1782	6	0.003367
TP53	G154	lung	2761	17	0.00615719
TP53	F113	breast	2561	7	0.00273331
TP53	Q144	lung	2761	12	0.00434625
POLE	V411	bowel	1782	4	0.00224467
POLE	V411	uterus	618	10	0.0161812
RAC1	A159	headandneck	988	6	0.00607287
MET	Y1230	kidney	1304	4	0.00306748
CTNNB1	S37	bladder	958	7	0.00730689
CTNNB1	S37	cnsbrain	2270	5	0.00220264
CTNNB1	S37	esophagusstomach	1407	11	0.00781805
CTNNB1	S37	liver	636	12	0.0188679
CTNNB1	S37	lung	2761	25	0.00905469
CTNNB1	S37	prostate	1379	4	0.00290065
CTNNB1	S37	uterus	618	27	0.0436893
CIC	R201	cnsbrain	2270	5	0.00220264
PTEN	R173	bowel	1782	8	0.00448934
EPAS1	Y532	adrenalgland	291	2	0.00687285
ERBB4	Q707	bladder	958	11	0.0114823
EGFR	E709	lung	2761	9	0.00325969
CCND1	P287	uterus	618	6	0.00970874
TP53	R342	bowel	1782	24	0.013468
TP53	R342	breast	2561	26	0.0101523
TP53	R342	esophagusstomach	1407	16	0.0113717
TP53	R342	headandneck	988	8	0.00809717
TP53	R342	lung	2761	11	0.00398406
TP53	R342	ovaryfallopiantube	699	6	0.00858369
TP53	R342	pancreas	1059	10	0.00944287
TP53	R342	skin	974	10	0.0102669
MYD88	M219	blood	890	2	0.00224719
PTPRT	L695	skin	974	8	0.00821355
ERBB2	G776	esophagusstomach	1407	3	0.0021322
SF3B1	K666	blood	890	2	0.00224719
SF3B1	K666	eye	128	2	0.015625
NFE2L2	T80	lung	2761	3	0.00108656
NFE2L2	T80	uterus	618	3	0.00485437
MYCN	P44	cnsbrain	2270	8	0.00352423
MYCN	P44	pancreas	1059	3	0.00283286
MYCN	P44	uterus	618	4	0.00647249
EPAS1	P531	adrenalgland	291	4	0.0137457
PIK3CA	Q546	bladder	958	5	0.00521921
PIK3CA	Q546	bowel	1782	21	0.0117845
PIK3CA	Q546	breast	2561	22	0.00859039
PIK3CA	Q546	cnsbrain	2270	6	0.00264317
PIK3CA	Q546	esophagusstomach	1407	4	0.00284293
PIK3CA	Q546	headandneck	988	5	0.00506073
PIK3CA	Q546	prostate	1379	4	0.00290065
PIK3CA	Q546	softtissue	739	3	0.00405954
PIK3CA	Q546	uterus	618	15	0.0242718
CREBBP	R1446	bladder	958	4	0.00417537
CREBBP	R1446	headandneck	988	4	0.00404858
CREBBP	R1446	lymph	366	5	0.0136612
RHOA	T37	bowel	1782	3	0.0016835
NUP93	E14	breast	2561	9	0.00351425
PRDM14	R505	bowel	1782	4	0.00224467
TP53	D281	cnsbrain	2270	10	0.00440529
TP53	D281	lung	2761	16	0.005795
TP53	G105	lung	2761	12	0.00434625
MET	V1070	kidney	1304	5	0.00383436
ETV6	R369	bowel	1782	5	0.00280584
KEAP1	V155	lung	2761	5	0.00181094
INPPL1	R70	esophagusstomach	1407	4	0.00284293
PIM1	L2	lymph	366	6	0.0163934
SMAD4	D351	bowel	1782	5	0.00280584
SMAD4	D351	esophagusstomach	1407	4	0.00284293
SMAD4	D351	lung	2761	6	0.00217313
TP53	K132	bowel	1782	7	0.00392817
TP53	K132	breast	2561	8	0.00312378
TP53	K132	cnsbrain	2270	9	0.00396476
TP53	K132	lung	2761	17	0.00615719
TP53	K132	ovaryfallopiantube	699	7	0.0100143
TP53	K132	pancreas	1059	7	0.00661001
ARID1A	R1989	bowel	1782	7	0.00392817
ARID1A	R1989	uterus	618	14	0.0226537
HIST1H3C	K37	headandneck	988	4	0.00404858
STK11	W239	lung	2761	5	0.00181094
KIT	K642	skin	974	8	0.00821355
KIT	K642	softtissue	739	2	0.00270636
KIT	K642	testis	217	2	0.00921659
FBXW7	R658	bowel	1782	7	0.00392817
FBXW7	R658	uterus	618	6	0.00970874
RHOA	Y42	esophagusstomach	1407	16	0.0113717
MAX	R36	blood	890	2	0.00224719
TP53	R249	breast	2561	7	0.00273331
TP53	R249	cnsbrain	2270	6	0.00264317
TP53	R249	esophagusstomach	1407	6	0.00426439
TP53	R249	headandneck	988	6	0.00607287
TP53	R249	liver	636	13	0.0204403
TP53	R249	lung	2761	33	0.0119522
IRF4	K123	blood	890	3	0.00337079
DIS3	D488	blood	890	4	0.00449438
DIS3	D488	lung	2761	4	0.00144875
STAT3	D661	headandneck	988	2	0.00202429
VHL	G114	kidney	1304	7	0.0053681
ERBB2	L755	bladder	958	3	0.00313152
ERBB2	L755	bowel	1782	4	0.00224467
ERBB2	L755	breast	2561	21	0.00819992
ERBB2	L755	esophagusstomach	1407	3	0.0021322
ERBB2	L755	lung	2761	6	0.00217313
ERBB2	L755	uterus	618	3	0.00485437
NFE2L2	E79	esophagusstomach	1407	4	0.00284293
NFE2L2	E79	headandneck	988	10	0.0101215
NFE2L2	E79	lung	2761	11	0.00398406
CREBBP	L1499	lymph	366	3	0.00819672
RHOA	G17	breast	2561	10	0.00390472
RHOA	G17	lymph	366	14	0.0382514
AR	H874	prostate	1379	16	0.0116026
KLF4	K443	pancreas	1059	2	0.00188857
RAC1	P34	testis	217	3	0.0138249
CDKN1A	M1	liver	636	3	0.00471698
CTNNB1	N387	liver	636	4	0.00628931
ERCC2	D609	bladder	958	3	0.00313152
STK11	W308	lung	2761	5	0.00181094
AR	W741	prostate	1379	7	0.00507614
BRAF	D594	bladder	958	6	0.00626305
BRAF	D594	blood	890	3	0.00337079
BRAF	D594	bowel	1782	12	0.00673401
BRAF	D594	lung	2761	10	0.00362188
BRAF	D594	skin	974	6	0.00616016
CARD11	D401	lymph	366	3	0.00819672
FGFR2	S252	uterus	618	16	0.02589
VHL	L169	kidney	1304	5	0.00383436
PIK3CA	E39	uterus	618	4	0.00647249
ALK	F1245	cnsbrain	2270	3	0.00132159
TBX3	W113	breast	2561	3	0.00117142
FOXA1	F266	prostate	1379	9	0.00652647
CDK4	K22	skin	974	6	0.00616016
CDKN2A	E120	headandneck	988	5	0.00506073
CYSLTR2	L129	eye	128	3	0.0234375
VHL	D121	kidney	1304	9	0.00690184
MYD88	L252	blood	890	13	0.0146067
MYD88	L252	lymph	366	19	0.0519126
KMT2D	L1375	kidney	1304	3	0.00230061
DNMT3B	V229	lung	2761	4	0.00144875
PPP2R1A	S256	uterus	618	11	0.0177994
IDH1	R132	biliarytract	358	57	0.159218
IDH1	R132	blood	890	23	0.0258427
IDH1	R132	bone	297	6	0.020202
IDH1	R132	bowel	1782	5	0.00280584
IDH1	R132	cnsbrain	2270	612	0.269604
IDH1	R132	liver	636	4	0.00628931
IDH1	R132	lung	2761	8	0.0028975
IDH1	R132	prostate	1379	11	0.00797679
IDH1	R132	skin	974	25	0.0256674
TP53	K120	cnsbrain	2270	4	0.00176211
GNAQ	R183	eye	128	4	0.03125
NOTCH2	T235	biliarytract	358	2	0.00558659
NOTCH2	T235	lymph	366	5	0.0136612
EGFR	A289	cnsbrain	2270	56	0.0246696
SOS1	N233	lung	2761	4	0.00144875
SOS1	N233	uterus	618	3	0.00485437
TGFBR1	S241	bowel	1782	9	0.00505051
IDH2	R172	biliarytract	358	9	0.0251397
IDH2	R172	blood	890	3	0.00337079
IDH2	R172	cnsbrain	2270	34	0.014978
IDH2	R172	lymph	366	8	0.0218579
ERCC2	Y72	bladder	958	4	0.00417537
BCL10	E178	pancreas	1059	2	0.00188857
TP53	E298	headandneck	988	7	0.00708502
TP53	E298	lung	2761	18	0.00651938
PTEN	G127	uterus	618	4	0.00647249
FH	M336	liver	636	2	0.00314465
HIST1H3B	E106	lung	2761	6	0.00217313
PTEN	G132	cnsbrain	2270	8	0.00352423
EGFR	L861	lung	2761	19	0.00688156
PBRM1	R1185	kidney	1304	4	0.00306748
PTPN11	D61	cnsbrain	2270	3	0.00132159
MAPK1	E322	bladder	958	4	0.00417537
MAPK1	E322	cervix	239	7	0.0292887
MAPK1	E322	headandneck	988	12	0.0121457
H3F3A	G35	cnsbrain	2270	10	0.00440529
DNMT1	E432	bowel	1782	5	0.00280584
TP53	V143	skin	974	4	0.00410678
ERBB2	S310	biliarytract	358	3	0.00837989
ERBB2	S310	bladder	958	56	0.0584551
ERBB2	S310	bowel	1782	6	0.003367
ERBB2	S310	breast	2561	12	0.00468567
ERBB2	S310	cervix	239	7	0.0292887
ERBB2	S310	esophagusstomach	1407	10	0.00710732
ERBB2	S310	lung	2761	4	0.00144875
ERBB2	S310	skin	974	6	0.00616016
RXRA	S427	bladder	958	23	0.0240084
VHL	I151	kidney	1304	6	0.00460123
TRAF7	N520	peritoneum	16	2	0.125
FGFR3	S249	bladder	958	103	0.107516
FGFR3	S249	headandneck	988	5	0.00506073
FGFR3	S249	lung	2761	4	0.00144875
FOXA1	R219	prostate	1379	4	0.00290065
MET	H1094	kidney	1304	3	0.00230061
MYOD1	L122	softtissue	739	5	0.0067659
KIT	D820	softtissue	739	6	0.00811908
KIT	D820	testis	217	2	0.00921659
TET1	P1752	skin	974	10	0.0102669
ESR1	D538	breast	2561	42	0.0163998
TP53	Y234	bladder	958	3	0.00313152
TP53	Y234	breast	2561	6	0.00234283
TP53	Y234	cnsbrain	2270	7	0.0030837
TP53	Y234	esophagusstomach	1407	5	0.00355366
TP53	Y234	lung	2761	11	0.00398406
TP53	Y234	ovaryfallopiantube	699	6	0.00858369
TP53	Y234	pancreas	1059	5	0.00472144
TP53	Y234	softtissue	739	3	0.00405954
DNMT1	E51	uterus	618	5	0.00809061
RAC1	K116	headandneck	988	2	0.00202429
PTPN11	N308	cnsbrain	2270	3	0.00132159
ATM	R337	bowel	1782	17	0.00953984
NF1	R2450	uterus	618	5	0.00809061
SMAD2	R321	bowel	1782	6	0.003367
CREBBP	Y1503	lymph	366	8	0.0218579
EIF1AX	G9	thyroid	618	4	0.00647249
PTPN11	A72	blood	890	3	0.00337079
PTPN11	A72	cnsbrain	2270	14	0.0061674
ERCC2	P463	bladder	958	4	0.00417537
TP53	Y126	bowel	1782	4	0.00224467
TP53	Y126	breast	2561	5	0.00195236
TP53	Y126	headandneck	988	4	0.00404858
TP53	Y126	pancreas	1059	5	0.00472144
CTCF	R377	uterus	618	8	0.012945
SMAD4	P356	bowel	1782	9	0.00505051
SMAD4	P356	esophagusstomach	1407	4	0.00284293
CTNNB1	I35	liver	636	3	0.00471698
CTNNB1	I35	uterus	618	2	0.00323625
LYN	I364	bladder	958	2	0.00208768
CIC	P203	cnsbrain	2270	3	0.00132159
PTEN	Y155	uterus	618	4	0.00647249
APC	Q1406	bowel	1782	17	0.00953984
FGFR2	Y375	uterus	618	2	0.00323625
GATA3	M293	breast	2561	9	0.00351425
CDH1	D288	esophagusstomach	1407	4	0.00284293
VHL	R161	kidney	1304	7	0.0053681
STAG2	R216	bladder	958	6	0.00626305
TP53	C242	bowel	1782	6	0.003367
TP53	C242	breast	2561	5	0.00195236
TP53	C242	headandneck	988	6	0.00607287
TP53	C242	lung	2761	17	0.00615719
TP53	C242	uterus	618	4	0.00647249
PDGFRA	E229	cnsbrain	2270	5	0.00220264
NRAS	Q61	biliarytract	358	5	0.0139665
NRAS	Q61	bladder	958	8	0.00835073
NRAS	Q61	blood	890	37	0.041573
NRAS	Q61	bowel	1782	35	0.0196409
NRAS	Q61	cnsbrain	2270	6	0.00264317
NRAS	Q61	esophagusstomach	1407	3	0.0021322
NRAS	Q61	headandneck	988	3	0.00303644
NRAS	Q61	lung	2761	17	0.00615719
NRAS	Q61	ovaryfallopiantube	699	5	0.00715308
NRAS	Q61	skin	974	187	0.191992
NRAS	Q61	softtissue	739	11	0.014885
NRAS	Q61	testis	217	9	0.0414747
NRAS	Q61	thymus	162	3	0.0185185
NRAS	Q61	thyroid	618	71	0.114887
NRAS	Q61	uterus	618	5	0.00809061
PIK3CA	H1047	biliarytract	358	3	0.00837989
PIK3CA	H1047	bladder	958	20	0.0208768
PIK3CA	H1047	bowel	1782	54	0.030303
PIK3CA	H1047	breast	2561	361	0.140961
PIK3CA	H1047	cervix	239	4	0.0167364
PIK3CA	H1047	cnsbrain	2270	27	0.0118943
PIK3CA	H1047	esophagusstomach	1407	28	0.0199005
PIK3CA	H1047	headandneck	988	25	0.0253036
PIK3CA	H1047	kidney	1304	5	0.00383436
PIK3CA	H1047	liver	636	3	0.00471698
PIK3CA	H1047	lung	2761	17	0.00615719
PIK3CA	H1047	ovaryfallopiantube	699	9	0.0128755
PIK3CA	H1047	pancreas	1059	7	0.00661001
PIK3CA	H1047	prostate	1379	6	0.00435098
PIK3CA	H1047	skin	974	5	0.00513347
PIK3CA	H1047	softtissue	739	11	0.014885
PIK3CA	H1047	thyroid	618	5	0.00809061
PIK3CA	H1047	uterus	618	51	0.0825243
TP53	C275	bowel	1782	6	0.003367
TP53	C275	cnsbrain	2270	8	0.00352423
TP53	C275	esophagusstomach	1407	6	0.00426439
TP53	C275	headandneck	988	4	0.00404858
TP53	C275	lung	2761	15	0.00543281
TP53	C275	ovaryfallopiantube	699	5	0.00715308
TP53	C275	skin	974	3	0.00308008
NFE2L2	E82	liver	636	4	0.00628931
NFE2L2	E82	uterus	618	7	0.0113269
EPHA7	G656	skin	974	9	0.00924025
IDH2	R140	blood	890	19	0.0213483
HRAS	G13	adrenalgland	291	2	0.00687285
HRAS	G13	bladder	958	11	0.0114823
HRAS	G13	headandneck	988	16	0.0161943
HRAS	G13	lung	2761	6	0.00217313
HRAS	G13	skin	974	7	0.00718686
HRAS	G13	thymus	162	3	0.0185185
PTPRD	S431	uterus	618	5	0.00809061
BCL2	G33	lymph	366	6	0.0163934
TP53	Y236	bowel	1782	8	0.00448934
TP53	Y236	breast	2561	7	0.00273331
TP53	Y236	cnsbrain	2270	6	0.00264317
TP53	Y236	headandneck	988	7	0.00708502
TP53	Y236	lung	2761	11	0.00398406
TP53	Y236	pancreas	1059	4	0.00377715
TP53	Y236	skin	974	3	0.00308008
CDK12	R890	bowel	1782	5	0.00280584
DIS3	R689	bowel	1782	5	0.00280584
PIM1	G28	lymph	366	8	0.0218579
PTEN	P38	skin	974	9	0.00924025
ANKRD11	K369	testis	217	2	0.00921659
IGF1R	G129	breast	2561	3	0.00117142
FBXW7	R367	bowel	1782	9	0.00505051
SMAD3	R268	bowel	1782	7	0.00392817
HIST1H3B	K28	cnsbrain	2270	11	0.00484581
TP53	R158	cnsbrain	2270	14	0.0061674
TP53	R158	lung	2761	55	0.0199203
TP53	L130	cnsbrain	2270	5	0.00220264
TCF7L2	R471	bowel	1782	13	0.00729517
ACVR1	R258	cnsbrain	2270	5	0.00220264
EGFR	K754	lung	2761	3	0.00108656
ERBB3	K329	bladder	958	4	0.00417537
ERBB3	K329	breast	2561	3	0.00117142
RAD51C	Y224	bladder	958	2	0.00208768
SF3B1	N626	blood	890	3	0.00337079
FOXA1	D226	breast	2561	5	0.00195236
FOXA1	D226	prostate	1379	3	0.00217549
BRAF	V600	biliarytract	358	4	0.0111732
BRAF	V600	bladder	958	2	0.00208768
BRAF	V600	blood	890	11	0.0123596
BRAF	V600	bowel	1782	113	0.0634119
BRAF	V600	cnsbrain	2270	20	0.00881057
BRAF	V600	lung	2761	33	0.0119522
BRAF	V600	ovaryfallopiantube	699	2	0.00286123
BRAF	V600	pancreas	1059	10	0.00944287
BRAF	V600	skin	974	357	0.36653
BRAF	V600	thyroid	618	316	0.511327
BCL6	R594	bowel	1782	7	0.00392817
KIT	V559	skin	974	3	0.00308008
KIT	V559	softtissue	739	8	0.0108254
B2M	L12	lymph	366	3	0.00819672
TP53	M133	breast	2561	4	0.00156189
KEAP1	G333	lung	2761	7	0.00253531
SMAD2	T303	bowel	1782	3	0.0016835
EGFR	S768	lung	2761	14	0.00507063
APC	Q1367	bowel	1782	28	0.0157127
VHL	P86	kidney	1304	9	0.00690184
PTPN11	T511	cnsbrain	2270	3	0.00132159
KIT	D816	blood	890	5	0.00561798
KIT	D816	testis	217	13	0.0599078
EGFR	L833	lung	2761	4	0.00144875
GNA11	Q209	eye	128	52	0.40625
GNA11	Q209	skin	974	6	0.00616016
ALK	R1275	cnsbrain	2270	15	0.00660793
SPOP	W131	prostate	1379	21	0.0152284
JAK1	L910	liver	636	3	0.00471698
ERBB4	S1289	bladder	958	12	0.0125261
TP53	C238	bladder	958	6	0.00626305
TP53	C238	bowel	1782	5	0.00280584
TP53	C238	breast	2561	5	0.00195236
TP53	C238	cnsbrain	2270	8	0.00352423
TP53	C238	esophagusstomach	1407	5	0.00355366
TP53	C238	headandneck	988	5	0.00506073
TP53	C238	lung	2761	11	0.00398406
TP53	C238	ovaryfallopiantube	699	5	0.00715308
TP53	C238	pancreas	1059	8	0.0075543
TP53	C238	uterus	618	6	0.00970874
STK11	G251	lung	2761	5	0.00181094
BCL10	N173	pancreas	1059	2	0.00188857
TGFBR1	T375	bowel	1782	3	0.0016835
TP53	G262	uterus	618	4	0.00647249
STK11	G242	lung	2761	9	0.00325969
SMO	V414	cervix	239	2	0.0083682
PIK3CA	P104	breast	2561	3	0.00117142
FBXW7	Y545	esophagusstomach	1407	3	0.0021322
EZH2	Y641	bone	297	3	0.010101
EZH2	Y641	lymph	366	23	0.0628415
EZH2	Y641	skin	974	10	0.0102669
CARD11	K215	lymph	366	4	0.010929
PTPN11	G507	esophagusstomach	1407	3	0.0021322
FOXO1	T24	lymph	366	3	0.00819672
CDH1	R63	breast	2561	5	0.00195236
RAD52	R396	skin	974	2	0.00205339
ERBB2	G660	bladder	958	3	0.00313152
SMARCA4	T910	cnsbrain	2270	5	0.00220264
SMARCA4	T910	esophagusstomach	1407	6	0.00426439
SMARCA4	T910	pancreas	1059	3	0.00283286
EGFR	G719	lung	2761	27	0.00977907
CDK4	R24	lung	2761	10	0.00362188
CDK4	R24	skin	974	11	0.0112936
NOTCH1	F853	lung	2761	4	0.00144875
ERBB3	V104	biliarytract	358	3	0.00837989
ERBB3	V104	bladder	958	13	0.0135699
ERBB3	V104	bowel	1782	16	0.00897868
ERBB3	V104	breast	2561	4	0.00156189
ERBB3	V104	cervix	239	4	0.0167364
ERBB3	V104	esophagusstomach	1407	12	0.00852878
ERBB3	V104	uterus	618	8	0.012945
TP53	V172	lung	2761	7	0.00253531
BCL2	K22	lymph	366	9	0.0245902
VHL	V74	kidney	1304	7	0.0053681
TGFBR2	E519	headandneck	988	5	0.00506073
CARD11	D357	lymph	366	3	0.00819672
PLK2	L208	esophagusstomach	1407	2	0.00142146
ARID1A	R1276	uterus	618	4	0.00647249
BRAF	N581	bowel	1782	5	0.00280584
BRAF	N581	lung	2761	5	0.00181094
BRAF	N581	ovaryfallopiantube	699	2	0.00286123
BRAF	N581	skin	974	5	0.00513347
TP53	C141	bowel	1782	5	0.00280584
TP53	C141	breast	2561	9	0.00351425
TP53	T155	cnsbrain	2270	5	0.00220264
TP53	T155	lung	2761	7	0.00253531
TP53	R181	skin	974	3	0.00308008
CTNNB1	D32	cervix	239	2	0.0083682
CTNNB1	D32	cnsbrain	2270	6	0.00264317
CTNNB1	D32	esophagusstomach	1407	4	0.00284293
CTNNB1	D32	liver	636	28	0.0440252
CTNNB1	D32	lung	2761	4	0.00144875
CTNNB1	D32	prostate	1379	8	0.00580131
CTNNB1	D32	skin	974	3	0.00308008
CTNNB1	D32	uterus	618	18	0.0291262
KIT	W557	softtissue	739	4	0.00541272
KIT	W557	testis	217	5	0.0230415
KDM6A	Q1003	bladder	958	3	0.00313152
TP53	C176	bowel	1782	19	0.0106622
TP53	C176	breast	2561	13	0.00507614
TP53	C176	esophagusstomach	1407	16	0.0113717
TP53	C176	headandneck	988	9	0.00910931
TP53	C176	lung	2761	16	0.005795
TP53	C176	lymph	366	4	0.010929
TP53	C176	ovaryfallopiantube	699	12	0.0171674
TP53	C176	pancreas	1059	7	0.00661001
TP53	C176	prostate	1379	5	0.00362582
XPO1	E571	blood	890	7	0.00786517
XPO1	E571	breast	2561	4	0.00156189
XPO1	E571	lymph	366	7	0.0191257
KIT	V654	softtissue	739	8	0.0108254
ERBB2	R678	bladder	958	6	0.00626305
ERBB2	R678	bowel	1782	9	0.00505051
ERBB2	R678	esophagusstomach	1407	9	0.00639659
ERBB2	R678	uterus	618	4	0.00647249
ALK	R401	bowel	1782	6	0.003367
KDM6A	G526	kidney	1304	3	0.00230061
STK11	N181	lung	2761	4	0.00144875
AXL	A273	bladder	958	3	0.00313152
KNSTRN	S24	skin	974	13	0.013347
SF3B1	E902	bladder	958	15	0.0156576
TP53	Y205	bowel	1782	7	0.00392817
TP53	Y205	breast	2561	7	0.00273331
TP53	Y205	cnsbrain	2270	4	0.00176211
TP53	Y205	esophagusstomach	1407	7	0.00497512
TP53	Y205	lung	2761	9	0.00325969
TP53	Y205	pancreas	1059	6	0.00566572
KIT	N822	skin	974	3	0.00308008
KIT	N822	softtissue	739	5	0.0067659
KIT	N822	testis	217	10	0.0460829
FGFR2	F276	biliarytract	358	2	0.00558659
ACVR1	G328	cnsbrain	2270	7	0.0030837
PIK3CA	V344	bowel	1782	6	0.003367
PIK3CA	V344	uterus	618	6	0.00970874
SPOP	F102	prostate	1379	22	0.0159536
FGFR3	G380	bladder	958	5	0.00521921
FGFR3	G380	headandneck	988	3	0.00303644
NOTCH1	C440	headandneck	988	3	0.00303644
ETV6	S284	skin	974	5	0.00513347
MYD88	P153	skin	974	4	0.00410678
NF1	R461	uterus	618	4	0.00647249
ERBB4	S774	esophagusstomach	1407	4	0.00284293
PPP2R1A	R183	bowel	1782	12	0.00673401
PPP2R1A	R183	breast	2561	4	0.00156189
PPP2R1A	R183	headandneck	988	3	0.00303644
PPP2R1A	R183	ovaryfallopiantube	699	6	0.00858369
PPP2R1A	R183	prostate	1379	3	0.00217549
PPP2R1A	R183	uterus	618	11	0.0177994
CTLA4	T17	pancreas	1059	2	0.00188857
TP53	C135	bowel	1782	9	0.00505051
TP53	C135	breast	2561	9	0.00351425
TP53	C135	esophagusstomach	1407	17	0.0120824
TP53	C135	kidney	1304	5	0.00383436
TP53	C135	lung	2761	10	0.00362188
BCOR	N1459	lung	2761	8	0.0028975
BCOR	N1459	uterus	618	23	0.0372168
CIC	N205	cnsbrain	2270	3	0.00132159
PIK3CA	R108	bowel	1782	8	0.00448934
PIK3CA	R108	uterus	618	6	0.00970874
VHL	L135	kidney	1304	4	0.00306748
PTEN	D92	uterus	618	4	0.00647249
SMARCA4	G1232	lung	2761	5	0.00181094
VHL	H115	kidney	1304	7	0.0053681

## Sheet: Comm_cancer_types_btw_hotspots
Gene	Protein	Hotspot_1	Hotspot_2	Aff_interactions_1	Aff_interactions_2	Same_interface	Cancer_types_1	Cancer_types_2	Num_common_cancer_types
PIK3CA	P42336	E545	E542	P27986,Q92569	P27986,Q92569	1	prostate,headandneck,lung,kidney,cervix,esophagusstomach,skin,thyroid,bladder,testis,cnsbrain,uterus,ovaryfallopiantube,penis,bowel,breast,biliarytract,pancreas	prostate,headandneck,lung,softtissue,kidney,cervix,esophagusstomach,bladder,testis,cnsbrain,uterus,bowel,breast,biliarytract	13
PIK3CA	P42336	E545	N345	P27986,Q92569	P27986,Q92569	1	prostate,headandneck,lung,kidney,cervix,esophagusstomach,skin,thyroid,bladder,testis,cnsbrain,uterus,ovaryfallopiantube,penis,bowel,breast,biliarytract,pancreas	prostate,headandneck,lung,softtissue,esophagusstomach,cnsbrain,uterus,bowel,breast	8
PIK3CA	P42336	E545	Q546	P27986,Q92569	P27986,Q92569	1	prostate,headandneck,lung,kidney,cervix,esophagusstomach,skin,thyroid,bladder,testis,cnsbrain,uterus,ovaryfallopiantube,penis,bowel,breast,biliarytract,pancreas	prostate,headandneck,softtissue,esophagusstomach,bladder,cnsbrain,uterus,bowel,breast	8
PIK3CA	P42336	E545	C420	P27986,Q92569	P27986,Q92569	1	prostate,headandneck,lung,kidney,cervix,esophagusstomach,skin,thyroid,bladder,testis,cnsbrain,uterus,ovaryfallopiantube,penis,bowel,breast,biliarytract,pancreas	headandneck,lung,cnsbrain,uterus,bowel,breast	6
PIK3CA	P42336	E545	E453	P27986,Q92569	P27986,Q92569	1	prostate,headandneck,lung,kidney,cervix,esophagusstomach,skin,thyroid,bladder,testis,cnsbrain,uterus,ovaryfallopiantube,penis,bowel,breast,biliarytract,pancreas	breast,bladder,cnsbrain	3
PIK3CA	P42336	E545	R357	P27986,Q92569	P27986,Q92569	1	prostate,headandneck,lung,kidney,cervix,esophagusstomach,skin,thyroid,bladder,testis,cnsbrain,uterus,ovaryfallopiantube,penis,bowel,breast,biliarytract,pancreas	bowel	1
PIK3CA	P42336	E542	N345	P27986,Q92569	P27986,Q92569	1	prostate,headandneck,lung,softtissue,kidney,cervix,esophagusstomach,bladder,testis,cnsbrain,uterus,bowel,breast,biliarytract	prostate,headandneck,lung,softtissue,esophagusstomach,cnsbrain,uterus,bowel,breast	9
PIK3CA	P42336	E542	Q546	P27986,Q92569	P27986,Q92569	1	prostate,headandneck,lung,softtissue,kidney,cervix,esophagusstomach,bladder,testis,cnsbrain,uterus,bowel,breast,biliarytract	prostate,headandneck,softtissue,esophagusstomach,bladder,cnsbrain,uterus,bowel,breast	9
PIK3CA	P42336	E542	C420	P27986,Q92569	P27986,Q92569	1	prostate,headandneck,lung,softtissue,kidney,cervix,esophagusstomach,bladder,testis,cnsbrain,uterus,bowel,breast,biliarytract	headandneck,lung,cnsbrain,uterus,bowel,breast	6
PIK3CA	P42336	E542	E453	P27986,Q92569	P27986,Q92569	1	prostate,headandneck,lung,softtissue,kidney,cervix,esophagusstomach,bladder,testis,cnsbrain,uterus,bowel,breast,biliarytract	breast,bladder,cnsbrain	3
PIK3CA	P42336	E542	R357	P27986,Q92569	P27986,Q92569	1	prostate,headandneck,lung,softtissue,kidney,cervix,esophagusstomach,bladder,testis,cnsbrain,uterus,bowel,breast,biliarytract	bowel	1
PIK3CA	P42336	N345	Q546	P27986,Q92569	P27986,Q92569	1	prostate,headandneck,lung,softtissue,esophagusstomach,cnsbrain,uterus,bowel,breast	prostate,headandneck,softtissue,esophagusstomach,bladder,cnsbrain,uterus,bowel,breast	8
PIK3CA	P42336	N345	C420	P27986,Q92569	P27986,Q92569	1	prostate,headandneck,lung,softtissue,esophagusstomach,cnsbrain,uterus,bowel,breast	headandneck,lung,cnsbrain,uterus,bowel,breast	6
PIK3CA	P42336	N345	E453	P27986,Q92569	P27986,Q92569	1	prostate,headandneck,lung,softtissue,esophagusstomach,cnsbrain,uterus,bowel,breast	breast,bladder,cnsbrain	2
PIK3CA	P42336	N345	R357	P27986,Q92569	P27986,Q92569	1	prostate,headandneck,lung,softtissue,esophagusstomach,cnsbrain,uterus,bowel,breast	bowel	1
PIK3CA	P42336	Q546	C420	P27986,Q92569	P27986,Q92569	1	prostate,headandneck,softtissue,esophagusstomach,bladder,cnsbrain,uterus,bowel,breast	headandneck,lung,cnsbrain,uterus,bowel,breast	5
PIK3CA	P42336	Q546	E453	P27986,Q92569	P27986,Q92569	1	prostate,headandneck,softtissue,esophagusstomach,bladder,cnsbrain,uterus,bowel,breast	breast,bladder,cnsbrain	3
PIK3CA	P42336	Q546	R357	P27986,Q92569	P27986,Q92569	1	prostate,headandneck,softtissue,esophagusstomach,bladder,cnsbrain,uterus,bowel,breast	bowel	1
PIK3CA	P42336	C420	E453	P27986,Q92569	P27986,Q92569	1	headandneck,lung,cnsbrain,uterus,bowel,breast	breast,bladder,cnsbrain	2
PIK3CA	P42336	C420	R357	P27986,Q92569	P27986,Q92569	1	headandneck,lung,cnsbrain,uterus,bowel,breast	bowel	1
PIK3CA	P42336	E453	R357	P27986,Q92569	P27986,Q92569	1	breast,bladder,cnsbrain	bowel	0
BRAF	P15056	V600	K601	B7Z2P9,P08238,P28482,P54274,Q02750,Q13177,Q13233,Q3V6T2,Q96PU5	B7Z2P9,P08238,P28482,P54274,Q02750,Q13177,Q13233,Q3V6T2,Q96PU5	1	lung,skin,thyroid,bladder,blood,cnsbrain,ovaryfallopiantube,bowel,biliarytract,pancreas	prostate,lung,skin,thyroid,lymph	3
EGFR	P00533	L858	A289	P35568,Q9UJM3	B4DJ51,B9A6J3,O00213,O00401,O00459,O00750,O14544,O14654,O43147,O43561,O43639,O75791,O95704,O96018,P00533,P04150,P05067,P08575,P0DMV8,P10636,P11279,P15941,P16333,P16885,P19174,P19438,P20936,P23467,P27986,P29353,P30307,P46934,P49069,P49757,P51636,P78453,Q02156,Q03135,Q05209,Q12913,Q12929,Q12933,Q13094,Q13322,Q13387,Q13480,Q13596,Q13905,Q14155,Q15075,Q53HG7,Q59EA3,Q59FG2,Q59GY7,Q68CZ2,Q6PKX4,Q6S5L8,…	0	lung	cnsbrain	0
EGFR	P00533	L858	G598	P35568,Q9UJM3	B4DJ51,B9A6J3,O00213,O00401,O00459,O00750,O14544,O14654,O43147,O43561,O43639,O75791,O95704,O96018,P00533,P04150,P05067,P08575,P0DMV8,P10636,P11279,P15941,P16333,P16885,P19174,P19438,P20936,P23467,P27986,P29353,P30307,P46934,P49069,P49757,P51636,P78453,Q02156,Q03135,Q05209,Q12913,Q12929,Q12933,Q13094,Q13322,Q13387,Q13480,Q13596,Q13905,Q14155,Q15075,Q53HG7,Q59EA3,Q59FG2,Q59GY7,Q68CZ2,Q6PKX4,Q6S5L8,…	0	lung	cnsbrain	0
EGFR	P00533	L858	G719	P35568,Q9UJM3	B4DJ51,B9A6J3,O00213,O00401,O00459,O00750,O14543,O14544,O14654,O43147,O43561,O43639,O43707,O60603,O60716,O60880,O75791,O95704,O96018,P00533,P04083,P04150,P04406,P05067,P05107,P06493,P07585,P07900,P08238,P08575,P0DMV8,P0DMV9,P10599,P10636,P11142,P11279,P11309,P12830,P14923,P15498,P15941,P16333,P16885,P17252,P18031,P19174,P19438,P20936,P23467,P23528,P26447,P27348,P27986,P29353,P30307,P31749,P31947,…	0	lung	lung	1
EGFR	P00533	L858	L861	P35568,Q9UJM3	P21860,P98077,Q08881,Q16620	0	lung	lung	1
EGFR	P00533	L858	S768	P35568,Q9UJM3	P00533,P21860,P98077	0	lung	lung	1
EGFR	P00533	L858	E709	P35568,Q9UJM3	B4DJ51,B9A6J3,O00213,O00401,O00459,O00750,O14543,O14544,O14654,O43147,O43561,O43639,O43707,O60603,O60716,O60880,O75791,O95704,O96018,P00533,P04083,P04150,P04406,P05067,P05107,P06493,P07585,P07900,P08238,P08575,P0DMV8,P0DMV9,P10599,P10636,P11142,P11279,P11309,P12830,P14923,P15498,P15941,P16333,P16885,P17252,P18031,P19174,P19438,P20936,P21860,P23467,P23528,P26447,P27348,P27986,P29353,P30307,P31749,…	0	lung	lung	1
EGFR	P00533	L858	L62	P35568,Q9UJM3	B4DJ51,B9A6J3,O00213,O00401,O00459,O00750,O14544,O14654,O43147,O43561,O43639,O75791,O95704,O96018,P00533,P04150,P05067,P08575,P0DMV8,P10636,P11279,P15941,P16333,P16885,P19174,P19438,P20936,P23467,P27986,P29353,P30307,P46934,P49069,P49757,P51636,P78453,Q02156,Q03135,Q05209,Q12913,Q12929,Q12933,Q13094,Q13322,Q13387,Q13480,Q13596,Q13905,Q14155,Q15075,Q53HG7,Q59EA3,Q59FG2,Q59GY7,Q68CZ2,Q6PKX4,Q6S5L8,…	0	lung	lung,cnsbrain	1
EGFR	P00533	L858	H304	P35568,Q9UJM3	B4DJ51,B9A6J3,O00213,O00401,O00459,O00750,O14543,O14544,O14654,O43147,O43561,O43639,O43707,O60603,O60716,O60880,O75791,O95704,O96018,P00533,P04083,P04150,P04406,P05067,P05107,P06493,P07585,P07900,P08238,P08575,P0DMV8,P0DMV9,P10599,P10636,P11142,P11279,P11309,P12830,P14923,P15498,P15941,P16333,P16885,P17252,P18031,P19174,P19438,P20936,P23467,P23528,P26447,P27348,P27986,P29353,P30307,P31749,P31947,…	0	lung	cnsbrain	0
EGFR	P00533	L858	T263	P35568,Q9UJM3	B4DJ51,B9A6J3,O00213,O00401,O00459,O00750,O14544,O14654,O43147,O43561,O43639,O75791,O95704,O96018,P00533,P04150,P05067,P08575,P0DMV8,P10636,P11279,P15941,P16333,P16885,P19174,P19438,P20936,P23467,P27986,P29353,P30307,P46934,P49069,P49757,P51636,P78453,Q02156,Q03135,Q05209,Q12913,Q12929,Q12933,Q13094,Q13322,Q13387,Q13480,Q13596,Q13905,Q14155,Q15075,Q53HG7,Q59EA3,Q59FG2,Q59GY7,Q68CZ2,Q6PKX4,Q6S5L8,…	0	lung	cnsbrain	0
EGFR	P00533	L858	A750	P35568,Q9UJM3	B4DJ51,B9A6J3,O00213,O00401,O00459,O00750,O14543,O14544,O14654,O43147,O43561,O43639,O43707,O60603,O60716,O60880,O75791,O95704,O96018,P00533,P04083,P04150,P04406,P05067,P05107,P06493,P07585,P07900,P08238,P08575,P0DMV8,P0DMV9,P10599,P10636,P11142,P11279,P11309,P12830,P14923,P15498,P15941,P16333,P16885,P17252,P18031,P19174,P19438,P20936,P21860,P23467,P23528,P26447,P27348,P27986,P29353,P30307,P31749,…	0	lung	lung	1
EGFR	P00533	L858	K754	P35568,Q9UJM3	P04049,P21860,Q16620	0	lung	lung	1
EGFR	P00533	L858	L833	P35568,Q9UJM3	P00533,P16234	0	lung	lung	1
EGFR	P00533	A289	G598	B4DJ51,B9A6J3,O00213,O00401,O00459,O00750,O14544,O14654,O43147,O43561,O43639,O75791,O95704,O96018,P00533,P04150,P05067,P08575,P0DMV8,P10636,P11279,P15941,P16333,P16885,P19174,P19438,P20936,P23467,P27986,P29353,P30307,P46934,P49069,P49757,P51636,P78453,Q02156,Q03135,Q05209,Q12913,Q12929,Q12933,Q13094,Q13322,Q13387,Q13480,Q13596,Q13905,Q14155,Q15075,Q53HG7,Q59EA3,Q59FG2,Q59GY7,Q68CZ2,Q6PKX4,Q6S5L8,…	B4DJ51,B9A6J3,O00213,O00401,O00459,O00750,O14544,O14654,O43147,O43561,O43639,O75791,O95704,O96018,P00533,P04150,P05067,P08575,P0DMV8,P10636,P11279,P15941,P16333,P16885,P19174,P19438,P20936,P23467,P27986,P29353,P30307,P46934,P49069,P49757,P51636,P78453,Q02156,Q03135,Q05209,Q12913,Q12929,Q12933,Q13094,Q13322,Q13387,Q13480,Q13596,Q13905,Q14155,Q15075,Q53HG7,Q59EA3,Q59FG2,Q59GY7,Q68CZ2,Q6PKX4,Q6S5L8,…	1	cnsbrain	cnsbrain	1
EGFR	P00533	A289	L861	B4DJ51,B9A6J3,O00213,O00401,O00459,O00750,O14544,O14654,O43147,O43561,O43639,O75791,O95704,O96018,P00533,P04150,P05067,P08575,P0DMV8,P10636,P11279,P15941,P16333,P16885,P19174,P19438,P20936,P23467,P27986,P29353,P30307,P46934,P49069,P49757,P51636,P78453,Q02156,Q03135,Q05209,Q12913,Q12929,Q12933,Q13094,Q13322,Q13387,Q13480,Q13596,Q13905,Q14155,Q15075,Q53HG7,Q59EA3,Q59FG2,Q59GY7,Q68CZ2,Q6PKX4,Q6S5L8,…	P21860,P98077,Q08881,Q16620	0	cnsbrain	lung	0
EGFR	P00533	A289	L62	B4DJ51,B9A6J3,O00213,O00401,O00459,O00750,O14544,O14654,O43147,O43561,O43639,O75791,O95704,O96018,P00533,P04150,P05067,P08575,P0DMV8,P10636,P11279,P15941,P16333,P16885,P19174,P19438,P20936,P23467,P27986,P29353,P30307,P46934,P49069,P49757,P51636,P78453,Q02156,Q03135,Q05209,Q12913,Q12929,Q12933,Q13094,Q13322,Q13387,Q13480,Q13596,Q13905,Q14155,Q15075,Q53HG7,Q59EA3,Q59FG2,Q59GY7,Q68CZ2,Q6PKX4,Q6S5L8,…	B4DJ51,B9A6J3,O00213,O00401,O00459,O00750,O14544,O14654,O43147,O43561,O43639,O75791,O95704,O96018,P00533,P04150,P05067,P08575,P0DMV8,P10636,P11279,P15941,P16333,P16885,P19174,P19438,P20936,P23467,P27986,P29353,P30307,P46934,P49069,P49757,P51636,P78453,Q02156,Q03135,Q05209,Q12913,Q12929,Q12933,Q13094,Q13322,Q13387,Q13480,Q13596,Q13905,Q14155,Q15075,Q53HG7,Q59EA3,Q59FG2,Q59GY7,Q68CZ2,Q6PKX4,Q6S5L8,…	1	cnsbrain	lung,cnsbrain	1
EGFR	P00533	A289	T263	B4DJ51,B9A6J3,O00213,O00401,O00459,O00750,O14544,O14654,O43147,O43561,O43639,O75791,O95704,O96018,P00533,P04150,P05067,P08575,P0DMV8,P10636,P11279,P15941,P16333,P16885,P19174,P19438,P20936,P23467,P27986,P29353,P30307,P46934,P49069,P49757,P51636,P78453,Q02156,Q03135,Q05209,Q12913,Q12929,Q12933,Q13094,Q13322,Q13387,Q13480,Q13596,Q13905,Q14155,Q15075,Q53HG7,Q59EA3,Q59FG2,Q59GY7,Q68CZ2,Q6PKX4,Q6S5L8,…	B4DJ51,B9A6J3,O00213,O00401,O00459,O00750,O14544,O14654,O43147,O43561,O43639,O75791,O95704,O96018,P00533,P04150,P05067,P08575,P0DMV8,P10636,P11279,P15941,P16333,P16885,P19174,P19438,P20936,P23467,P27986,P29353,P30307,P46934,P49069,P49757,P51636,P78453,Q02156,Q03135,Q05209,Q12913,Q12929,Q12933,Q13094,Q13322,Q13387,Q13480,Q13596,Q13905,Q14155,Q15075,Q53HG7,Q59EA3,Q59FG2,Q59GY7,Q68CZ2,Q6PKX4,Q6S5L8,…	1	cnsbrain	cnsbrain	1
EGFR	P00533	A289	K754	B4DJ51,B9A6J3,O00213,O00401,O00459,O00750,O14544,O14654,O43147,O43561,O43639,O75791,O95704,O96018,P00533,P04150,P05067,P08575,P0DMV8,P10636,P11279,P15941,P16333,P16885,P19174,P19438,P20936,P23467,P27986,P29353,P30307,P46934,P49069,P49757,P51636,P78453,Q02156,Q03135,Q05209,Q12913,Q12929,Q12933,Q13094,Q13322,Q13387,Q13480,Q13596,Q13905,Q14155,Q15075,Q53HG7,Q59EA3,Q59FG2,Q59GY7,Q68CZ2,Q6PKX4,Q6S5L8,…	P04049,P21860,Q16620	0	cnsbrain	lung	0
EGFR	P00533	G598	L861	B4DJ51,B9A6J3,O00213,O00401,O00459,O00750,O14544,O14654,O43147,O43561,O43639,O75791,O95704,O96018,P00533,P04150,P05067,P08575,P0DMV8,P10636,P11279,P15941,P16333,P16885,P19174,P19438,P20936,P23467,P27986,P29353,P30307,P46934,P49069,P49757,P51636,P78453,Q02156,Q03135,Q05209,Q12913,Q12929,Q12933,Q13094,Q13322,Q13387,Q13480,Q13596,Q13905,Q14155,Q15075,Q53HG7,Q59EA3,Q59FG2,Q59GY7,Q68CZ2,Q6PKX4,Q6S5L8,…	P21860,P98077,Q08881,Q16620	0	cnsbrain	lung	0
EGFR	P00533	G598	L62	B4DJ51,B9A6J3,O00213,O00401,O00459,O00750,O14544,O14654,O43147,O43561,O43639,O75791,O95704,O96018,P00533,P04150,P05067,P08575,P0DMV8,P10636,P11279,P15941,P16333,P16885,P19174,P19438,P20936,P23467,P27986,P29353,P30307,P46934,P49069,P49757,P51636,P78453,Q02156,Q03135,Q05209,Q12913,Q12929,Q12933,Q13094,Q13322,Q13387,Q13480,Q13596,Q13905,Q14155,Q15075,Q53HG7,Q59EA3,Q59FG2,Q59GY7,Q68CZ2,Q6PKX4,Q6S5L8,…	B4DJ51,B9A6J3,O00213,O00401,O00459,O00750,O14544,O14654,O43147,O43561,O43639,O75791,O95704,O96018,P00533,P04150,P05067,P08575,P0DMV8,P10636,P11279,P15941,P16333,P16885,P19174,P19438,P20936,P23467,P27986,P29353,P30307,P46934,P49069,P49757,P51636,P78453,Q02156,Q03135,Q05209,Q12913,Q12929,Q12933,Q13094,Q13322,Q13387,Q13480,Q13596,Q13905,Q14155,Q15075,Q53HG7,Q59EA3,Q59FG2,Q59GY7,Q68CZ2,Q6PKX4,Q6S5L8,…	1	cnsbrain	lung,cnsbrain	1
EGFR	P00533	G598	T263	B4DJ51,B9A6J3,O00213,O00401,O00459,O00750,O14544,O14654,O43147,O43561,O43639,O75791,O95704,O96018,P00533,P04150,P05067,P08575,P0DMV8,P10636,P11279,P15941,P16333,P16885,P19174,P19438,P20936,P23467,P27986,P29353,P30307,P46934,P49069,P49757,P51636,P78453,Q02156,Q03135,Q05209,Q12913,Q12929,Q12933,Q13094,Q13322,Q13387,Q13480,Q13596,Q13905,Q14155,Q15075,Q53HG7,Q59EA3,Q59FG2,Q59GY7,Q68CZ2,Q6PKX4,Q6S5L8,…	B4DJ51,B9A6J3,O00213,O00401,O00459,O00750,O14544,O14654,O43147,O43561,O43639,O75791,O95704,O96018,P00533,P04150,P05067,P08575,P0DMV8,P10636,P11279,P15941,P16333,P16885,P19174,P19438,P20936,P23467,P27986,P29353,P30307,P46934,P49069,P49757,P51636,P78453,Q02156,Q03135,Q05209,Q12913,Q12929,Q12933,Q13094,Q13322,Q13387,Q13480,Q13596,Q13905,Q14155,Q15075,Q53HG7,Q59EA3,Q59FG2,Q59GY7,Q68CZ2,Q6PKX4,Q6S5L8,…	1	cnsbrain	cnsbrain	1
EGFR	P00533	G598	K754	B4DJ51,B9A6J3,O00213,O00401,O00459,O00750,O14544,O14654,O43147,O43561,O43639,O75791,O95704,O96018,P00533,P04150,P05067,P08575,P0DMV8,P10636,P11279,P15941,P16333,P16885,P19174,P19438,P20936,P23467,P27986,P29353,P30307,P46934,P49069,P49757,P51636,P78453,Q02156,Q03135,Q05209,Q12913,Q12929,Q12933,Q13094,Q13322,Q13387,Q13480,Q13596,Q13905,Q14155,Q15075,Q53HG7,Q59EA3,Q59FG2,Q59GY7,Q68CZ2,Q6PKX4,Q6S5L8,…	P04049,P21860,Q16620	0	cnsbrain	lung	0
EGFR	P00533	G719	K754	B4DJ51,B9A6J3,O00213,O00401,O00459,O00750,O14543,O14544,O14654,O43147,O43561,O43639,O43707,O60603,O60716,O60880,O75791,O95704,O96018,P00533,P04083,P04150,P04406,P05067,P05107,P06493,P07585,P07900,P08238,P08575,P0DMV8,P0DMV9,P10599,P10636,P11142,P11279,P11309,P12830,P14923,P15498,P15941,P16333,P16885,P17252,P18031,P19174,P19438,P20936,P23467,P23528,P26447,P27348,P27986,P29353,P30307,P31749,P31947,…	P04049,P21860,Q16620	0	lung	lung	1
EGFR	P00533	L861	L62	P21860,P98077,Q08881,Q16620	B4DJ51,B9A6J3,O00213,O00401,O00459,O00750,O14544,O14654,O43147,O43561,O43639,O75791,O95704,O96018,P00533,P04150,P05067,P08575,P0DMV8,P10636,P11279,P15941,P16333,P16885,P19174,P19438,P20936,P23467,P27986,P29353,P30307,P46934,P49069,P49757,P51636,P78453,Q02156,Q03135,Q05209,Q12913,Q12929,Q12933,Q13094,Q13322,Q13387,Q13480,Q13596,Q13905,Q14155,Q15075,Q53HG7,Q59EA3,Q59FG2,Q59GY7,Q68CZ2,Q6PKX4,Q6S5L8,…	0	lung	lung,cnsbrain	1
EGFR	P00533	L861	H304	P21860,P98077,Q08881,Q16620	B4DJ51,B9A6J3,O00213,O00401,O00459,O00750,O14543,O14544,O14654,O43147,O43561,O43639,O43707,O60603,O60716,O60880,O75791,O95704,O96018,P00533,P04083,P04150,P04406,P05067,P05107,P06493,P07585,P07900,P08238,P08575,P0DMV8,P0DMV9,P10599,P10636,P11142,P11279,P11309,P12830,P14923,P15498,P15941,P16333,P16885,P17252,P18031,P19174,P19438,P20936,P23467,P23528,P26447,P27348,P27986,P29353,P30307,P31749,P31947,…	0	lung	cnsbrain	0
EGFR	P00533	L861	T263	P21860,P98077,Q08881,Q16620	B4DJ51,B9A6J3,O00213,O00401,O00459,O00750,O14544,O14654,O43147,O43561,O43639,O75791,O95704,O96018,P00533,P04150,P05067,P08575,P0DMV8,P10636,P11279,P15941,P16333,P16885,P19174,P19438,P20936,P23467,P27986,P29353,P30307,P46934,P49069,P49757,P51636,P78453,Q02156,Q03135,Q05209,Q12913,Q12929,Q12933,Q13094,Q13322,Q13387,Q13480,Q13596,Q13905,Q14155,Q15075,Q53HG7,Q59EA3,Q59FG2,Q59GY7,Q68CZ2,Q6PKX4,Q6S5L8,…	0	lung	cnsbrain	0
EGFR	P00533	L861	L833	P21860,P98077,Q08881,Q16620	P00533,P16234	0	lung	lung	1
EGFR	P00533	L62	T263	B4DJ51,B9A6J3,O00213,O00401,O00459,O00750,O14544,O14654,O43147,O43561,O43639,O75791,O95704,O96018,P00533,P04150,P05067,P08575,P0DMV8,P10636,P11279,P15941,P16333,P16885,P19174,P19438,P20936,P23467,P27986,P29353,P30307,P46934,P49069,P49757,P51636,P78453,Q02156,Q03135,Q05209,Q12913,Q12929,Q12933,Q13094,Q13322,Q13387,Q13480,Q13596,Q13905,Q14155,Q15075,Q53HG7,Q59EA3,Q59FG2,Q59GY7,Q68CZ2,Q6PKX4,Q6S5L8,…	B4DJ51,B9A6J3,O00213,O00401,O00459,O00750,O14544,O14654,O43147,O43561,O43639,O75791,O95704,O96018,P00533,P04150,P05067,P08575,P0DMV8,P10636,P11279,P15941,P16333,P16885,P19174,P19438,P20936,P23467,P27986,P29353,P30307,P46934,P49069,P49757,P51636,P78453,Q02156,Q03135,Q05209,Q12913,Q12929,Q12933,Q13094,Q13322,Q13387,Q13480,Q13596,Q13905,Q14155,Q15075,Q53HG7,Q59EA3,Q59FG2,Q59GY7,Q68CZ2,Q6PKX4,Q6S5L8,…	1	lung,cnsbrain	cnsbrain	1
EGFR	P00533	L62	K754	B4DJ51,B9A6J3,O00213,O00401,O00459,O00750,O14544,O14654,O43147,O43561,O43639,O75791,O95704,O96018,P00533,P04150,P05067,P08575,P0DMV8,P10636,P11279,P15941,P16333,P16885,P19174,P19438,P20936,P23467,P27986,P29353,P30307,P46934,P49069,P49757,P51636,P78453,Q02156,Q03135,Q05209,Q12913,Q12929,Q12933,Q13094,Q13322,Q13387,Q13480,Q13596,Q13905,Q14155,Q15075,Q53HG7,Q59EA3,Q59FG2,Q59GY7,Q68CZ2,Q6PKX4,Q6S5L8,…	P04049,P21860,Q16620	0	lung,cnsbrain	lung	1
EGFR	P00533	H304	K754	B4DJ51,B9A6J3,O00213,O00401,O00459,O00750,O14543,O14544,O14654,O43147,O43561,O43639,O43707,O60603,O60716,O60880,O75791,O95704,O96018,P00533,P04083,P04150,P04406,P05067,P05107,P06493,P07585,P07900,P08238,P08575,P0DMV8,P0DMV9,P10599,P10636,P11142,P11279,P11309,P12830,P14923,P15498,P15941,P16333,P16885,P17252,P18031,P19174,P19438,P20936,P23467,P23528,P26447,P27348,P27986,P29353,P30307,P31749,P31947,…	P04049,P21860,Q16620	0	cnsbrain	lung	0
EGFR	P00533	T263	K754	B4DJ51,B9A6J3,O00213,O00401,O00459,O00750,O14544,O14654,O43147,O43561,O43639,O75791,O95704,O96018,P00533,P04150,P05067,P08575,P0DMV8,P10636,P11279,P15941,P16333,P16885,P19174,P19438,P20936,P23467,P27986,P29353,P30307,P46934,P49069,P49757,P51636,P78453,Q02156,Q03135,Q05209,Q12913,Q12929,Q12933,Q13094,Q13322,Q13387,Q13480,Q13596,Q13905,Q14155,Q15075,Q53HG7,Q59EA3,Q59FG2,Q59GY7,Q68CZ2,Q6PKX4,Q6S5L8,…	P04049,P21860,Q16620	0	cnsbrain	lung	0
EGFR	P00533	K754	L833	P04049,P21860,Q16620	P00533,P16234	0	lung	lung	1
TP53	P04637	R273	G245	B4DT73,O14757,O14920,O15126,O43741,O60341,O95376,O95816,O96017,P08238,P10415,P11142,P13693,P17844,P20073,P28482,P38646,P42224,P43356,P46108,P49888,P60953,P62987,P63162,P63279,P67870,Q13625,Q14061,Q15466,Q15486,Q15672,Q53FC7,Q7LG56,Q8N2W9,Q8NHY2,Q8WUF5,Q92993,Q96KB5,Q96M61,Q9UNE7	P04637	0	prostate,headandneck,lung,kidney,esophagusstomach,bladder,blood,cnsbrain,ovaryfallopiantube,uterus,bowel,breast,pancreas	prostate,headandneck,lung,esophagusstomach,bladder,ovaryfallopiantube,cnsbrain,uterus,bowel,breast,pancreas	11
TP53	P04637	R273	R282	B4DT73,O14757,O14920,O15126,O43741,O60341,O95376,O95816,O96017,P08238,P10415,P11142,P13693,P17844,P20073,P28482,P38646,P42224,P43356,P46108,P49888,P60953,P62987,P63162,P63279,P67870,Q13625,Q14061,Q15466,Q15486,Q15672,Q53FC7,Q7LG56,Q8N2W9,Q8NHY2,Q8WUF5,Q92993,Q96KB5,Q96M61,Q9UNE7	P04637	0	prostate,headandneck,lung,kidney,esophagusstomach,bladder,blood,cnsbrain,ovaryfallopiantube,uterus,bowel,breast,pancreas	prostate,headandneck,lung,esophagusstomach,skin,bladder,cnsbrain,ovaryfallopiantube,bowel,pancreas	9
TP53	P04637	R273	M237	B4DT73,O14757,O14920,O15126,O43741,O60341,O95376,O95816,O96017,P08238,P10415,P11142,P13693,P17844,P20073,P28482,P38646,P42224,P43356,P46108,P49888,P60953,P62987,P63162,P63279,P67870,Q13625,Q14061,Q15466,Q15486,Q15672,Q53FC7,Q7LG56,Q8N2W9,Q8NHY2,Q8WUF5,Q92993,Q96KB5,Q96M61,Q9UNE7	Q07817	0	prostate,headandneck,lung,kidney,esophagusstomach,bladder,blood,cnsbrain,ovaryfallopiantube,uterus,bowel,breast,pancreas	headandneck,lung,esophagusstomach,ovaryfallopiantube,cnsbrain,uterus,bowel	7
TP53	P04637	R273	C242	B4DT73,O14757,O14920,O15126,O43741,O60341,O95376,O95816,O96017,P08238,P10415,P11142,P13693,P17844,P20073,P28482,P38646,P42224,P43356,P46108,P49888,P60953,P62987,P63162,P63279,P67870,Q13625,Q14061,Q15466,Q15486,Q15672,Q53FC7,Q7LG56,Q8N2W9,Q8NHY2,Q8WUF5,Q92993,Q96KB5,Q96M61,Q9UNE7	P04637	0	prostate,headandneck,lung,kidney,esophagusstomach,bladder,blood,cnsbrain,ovaryfallopiantube,uterus,bowel,breast,pancreas	headandneck,lung,uterus,bowel,breast	5
TP53	P04637	R273	E286	B4DT73,O14757,O14920,O15126,O43741,O60341,O95376,O95816,O96017,P08238,P10415,P11142,P13693,P17844,P20073,P28482,P38646,P42224,P43356,P46108,P49888,P60953,P62987,P63162,P63279,P67870,Q13625,Q14061,Q15466,Q15486,Q15672,Q53FC7,Q7LG56,Q8N2W9,Q8NHY2,Q8WUF5,Q92993,Q96KB5,Q96M61,Q9UNE7	O14641,O43261,O43524,O75925,O75928,P04637,P08047,P09874,P0CG48,P11274,P13497,P16885,P17028,P19338,P29590,P38398,P42858,P48643,P51587,P53350,P54132,P78527,Q05086,Q12873,Q13315,Q13535,Q13746,Q14191,Q14695,Q14999,Q15648,Q16363,Q16665,Q16666,Q8IWT3,Q8NA92,Q8TBK6,Q8WWV6,Q92831,Q92922,Q96EB6,Q9BQA5,Q9BWC9,Q9BX70,Q9C0J8,Q9H2X6,Q9H4B4,Q9H9B1,Q9NS56,Q9UER7,Q9UKY1,Q9UN74,Q9Y2A0,Q9Y675	0	prostate,headandneck,lung,kidney,esophagusstomach,bladder,blood,cnsbrain,ovaryfallopiantube,uterus,bowel,breast,pancreas	lung,esophagusstomach,skin,bowel,breast	4
TP53	P04637	R273	R110	B4DT73,O14757,O14920,O15126,O43741,O60341,O95376,O95816,O96017,P08238,P10415,P11142,P13693,P17844,P20073,P28482,P38646,P42224,P43356,P46108,P49888,P60953,P62987,P63162,P63279,P67870,Q13625,Q14061,Q15466,Q15486,Q15672,Q53FC7,Q7LG56,Q8N2W9,Q8NHY2,Q8WUF5,Q92993,Q96KB5,Q96M61,Q9UNE7	O14641,O43261,O43524,O75925,O75928,P04637,P08047,P09874,P0CG48,P11274,P13497,P16885,P17028,P19338,P29590,P38398,P42858,P48643,P51587,P53350,P54132,P78527,Q05086,Q12873,Q13315,Q13535,Q13746,Q14191,Q14695,Q14999,Q15648,Q16363,Q16665,Q16666,Q8IWT3,Q8NA92,Q8TBK6,Q8WWV6,Q92831,Q92922,Q96EB6,Q9BQA5,Q9BWC9,Q9BX70,Q9C0J8,Q9H2X6,Q9H4B4,Q9H9B1,Q9NS56,Q9UER7,Q9UKY1,Q9UN74,Q9Y2A0,Q9Y675	0	prostate,headandneck,lung,kidney,esophagusstomach,bladder,blood,cnsbrain,ovaryfallopiantube,uterus,bowel,breast,pancreas	lung	1
TP53	P04637	R273	P152	B4DT73,O14757,O14920,O15126,O43741,O60341,O95376,O95816,O96017,P08238,P10415,P11142,P13693,P17844,P20073,P28482,P38646,P42224,P43356,P46108,P49888,P60953,P62987,P63162,P63279,P67870,Q13625,Q14061,Q15466,Q15486,Q15672,Q53FC7,Q7LG56,Q8N2W9,Q8NHY2,Q8WUF5,Q92993,Q96KB5,Q96M61,Q9UNE7	O14641,O43261,O43524,O75925,O75928,P04637,P08047,P09874,P0CG48,P11274,P13497,P16885,P17028,P19338,P29590,P38398,P42858,P48643,P51587,P53350,P54132,P78527,Q05086,Q12873,Q12888,Q13315,Q13535,Q13746,Q14191,Q14695,Q14999,Q15648,Q16363,Q16665,Q16666,Q8IWT3,Q8NA92,Q8TBK6,Q8WWV6,Q92831,Q92922,Q96EB6,Q9BQA5,Q9BWC9,Q9BX70,Q9C0J8,Q9H2X6,Q9H4B4,Q9H9B1,Q9NS56,Q9UER7,Q9UKY1,Q9UN74,Q9Y2A0,Q9Y675	0	prostate,headandneck,lung,kidney,esophagusstomach,bladder,blood,cnsbrain,ovaryfallopiantube,uterus,bowel,breast,pancreas	bowel	1
TP53	P04637	R273	R267	B4DT73,O14757,O14920,O15126,O43741,O60341,O95376,O95816,O96017,P08238,P10415,P11142,P13693,P17844,P20073,P28482,P38646,P42224,P43356,P46108,P49888,P60953,P62987,P63162,P63279,P67870,Q13625,Q14061,Q15466,Q15486,Q15672,Q53FC7,Q7LG56,Q8N2W9,Q8NHY2,Q8WUF5,Q92993,Q96KB5,Q96M61,Q9UNE7	P04637	0	prostate,headandneck,lung,kidney,esophagusstomach,bladder,blood,cnsbrain,ovaryfallopiantube,uterus,bowel,breast,pancreas	lung	1
TP53	P04637	R273	G105	B4DT73,O14757,O14920,O15126,O43741,O60341,O95376,O95816,O96017,P08238,P10415,P11142,P13693,P17844,P20073,P28482,P38646,P42224,P43356,P46108,P49888,P60953,P62987,P63162,P63279,P67870,Q13625,Q14061,Q15466,Q15486,Q15672,Q53FC7,Q7LG56,Q8N2W9,Q8NHY2,Q8WUF5,Q92993,Q96KB5,Q96M61,Q9UNE7	O14641,O43261,O43524,O75925,O75928,P04637,P08047,P09874,P0CG48,P11274,P13497,P16885,P17028,P19338,P29590,P38398,P42858,P48643,P51587,P53350,P54132,P78527,Q05086,Q12873,Q12888,Q13315,Q13535,Q13746,Q14191,Q14695,Q14999,Q15648,Q16363,Q16665,Q16666,Q8IWT3,Q8NA92,Q8TBK6,Q8WWV6,Q92831,Q92922,Q96EB6,Q9BQA5,Q9BWC9,Q9BX70,Q9C0J8,Q9H2X6,Q9H4B4,Q9H9B1,Q9NS56,Q9UER7,Q9UKY1,Q9UN74,Q9Y2A0,Q9Y675	0	prostate,headandneck,lung,kidney,esophagusstomach,bladder,blood,cnsbrain,ovaryfallopiantube,uterus,bowel,breast,pancreas	lung	1
TP53	P04637	R273	V172	B4DT73,O14757,O14920,O15126,O43741,O60341,O95376,O95816,O96017,P08238,P10415,P11142,P13693,P17844,P20073,P28482,P38646,P42224,P43356,P46108,P49888,P60953,P62987,P63162,P63279,P67870,Q13625,Q14061,Q15466,Q15486,Q15672,Q53FC7,Q7LG56,Q8N2W9,Q8NHY2,Q8WUF5,Q92993,Q96KB5,Q96M61,Q9UNE7	P04637,Q12888	0	prostate,headandneck,lung,kidney,esophagusstomach,bladder,blood,cnsbrain,ovaryfallopiantube,uterus,bowel,breast,pancreas	lung	1
TP53	P04637	R273	Y107	B4DT73,O14757,O14920,O15126,O43741,O60341,O95376,O95816,O96017,P08238,P10415,P11142,P13693,P17844,P20073,P28482,P38646,P42224,P43356,P46108,P49888,P60953,P62987,P63162,P63279,P67870,Q13625,Q14061,Q15466,Q15486,Q15672,Q53FC7,Q7LG56,Q8N2W9,Q8NHY2,Q8WUF5,Q92993,Q96KB5,Q96M61,Q9UNE7	O14641,O43261,O43524,O75925,O75928,P04637,P08047,P09874,P0CG48,P11274,P13497,P16885,P17028,P19338,P29590,P38398,P42858,P48643,P51587,P53350,P54132,P78527,Q05086,Q12873,Q12888,Q13315,Q13535,Q13746,Q14191,Q14695,Q14999,Q15648,Q16363,Q16665,Q16666,Q8IWT3,Q8NA92,Q8TBK6,Q8WWV6,Q92831,Q92922,Q96EB6,Q9BQA5,Q9BWC9,Q9BX70,Q9C0J8,Q9H2X6,Q9H4B4,Q9H9B1,Q9NS56,Q9UER7,Q9UKY1,Q9UN74,Q9Y2A0,Q9Y675	0	prostate,headandneck,lung,kidney,esophagusstomach,bladder,blood,cnsbrain,ovaryfallopiantube,uterus,bowel,breast,pancreas	breast	1
TP53	P04637	R273	P190	B4DT73,O14757,O14920,O15126,O43741,O60341,O95376,O95816,O96017,P08238,P10415,P11142,P13693,P17844,P20073,P28482,P38646,P42224,P43356,P46108,P49888,P60953,P62987,P63162,P63279,P67870,Q13625,Q14061,Q15466,Q15486,Q15672,Q53FC7,Q7LG56,Q8N2W9,Q8NHY2,Q8WUF5,Q92993,Q96KB5,Q96M61,Q9UNE7	O14641,O43261,O43524,O75925,O75928,P04637,P08047,P09874,P0CG48,P11274,P13497,P16885,P17028,P19338,P29590,P38398,P42858,P48643,P51587,P53350,P54132,P78527,Q05086,Q12873,Q13315,Q13535,Q13746,Q14191,Q14695,Q14999,Q15648,Q16363,Q16665,Q16666,Q8IWT3,Q8NA92,Q8TBK6,Q8WWV6,Q92831,Q92922,Q96EB6,Q9BQA5,Q9BWC9,Q9BX70,Q9C0J8,Q9H2X6,Q9H4B4,Q9H9B1,Q9NS56,Q9UER7,Q9UKY1,Q9UN74,Q9Y2A0,Q9Y675	0	prostate,headandneck,lung,kidney,esophagusstomach,bladder,blood,cnsbrain,ovaryfallopiantube,uterus,bowel,breast,pancreas	bowel	1
TP53	P04637	G245	R282	P04637	P04637	1	prostate,headandneck,lung,esophagusstomach,bladder,ovaryfallopiantube,cnsbrain,uterus,bowel,breast,pancreas	prostate,headandneck,lung,esophagusstomach,skin,bladder,cnsbrain,ovaryfallopiantube,bowel,pancreas	9
TP53	P04637	G245	M237	P04637	Q07817	0	prostate,headandneck,lung,esophagusstomach,bladder,ovaryfallopiantube,cnsbrain,uterus,bowel,breast,pancreas	headandneck,lung,esophagusstomach,ovaryfallopiantube,cnsbrain,uterus,bowel	7
TP53	P04637	G245	C242	P04637	P04637	1	prostate,headandneck,lung,esophagusstomach,bladder,ovaryfallopiantube,cnsbrain,uterus,bowel,breast,pancreas	headandneck,lung,uterus,bowel,breast	5
TP53	P04637	G245	D281	P04637	Q8WUF5	0	prostate,headandneck,lung,esophagusstomach,bladder,ovaryfallopiantube,cnsbrain,uterus,bowel,breast,pancreas	lung,cnsbrain	2
TP53	P04637	G245	R267	P04637	P04637	1	prostate,headandneck,lung,esophagusstomach,bladder,ovaryfallopiantube,cnsbrain,uterus,bowel,breast,pancreas	lung	1
TP53	P04637	R282	M237	P04637	Q07817	0	prostate,headandneck,lung,esophagusstomach,skin,bladder,cnsbrain,ovaryfallopiantube,bowel,pancreas	headandneck,lung,esophagusstomach,ovaryfallopiantube,cnsbrain,uterus,bowel	6
TP53	P04637	R282	C242	P04637	P04637	1	prostate,headandneck,lung,esophagusstomach,skin,bladder,cnsbrain,ovaryfallopiantube,bowel,pancreas	headandneck,lung,uterus,bowel,breast	3
TP53	P04637	R282	D281	P04637	Q8WUF5	0	prostate,headandneck,lung,esophagusstomach,skin,bladder,cnsbrain,ovaryfallopiantube,bowel,pancreas	lung,cnsbrain	2
TP53	P04637	R282	R267	P04637	P04637	1	prostate,headandneck,lung,esophagusstomach,skin,bladder,cnsbrain,ovaryfallopiantube,bowel,pancreas	lung	1
TP53	P04637	H179	D281	P04637,Q07817,Q13625	Q8WUF5	0	prostate,headandneck,lung,esophagusstomach,cnsbrain,uterus,ovaryfallopiantube,bowel,breast,pancreas	lung,cnsbrain	2
TP53	P04637	R342	M237	O14641,O43261,O43524,O75925,O75928,O96017,P04637,P08047,P08238,P09874,P0CG48,P11142,P11274,P13497,P16885,P17028,P17844,P19338,P20073,P29590,P38398,P38646,P42858,P43356,P48643,P51587,P53350,P54132,P60953,P62987,P63279,P67870,P78527,Q05086,Q12873,Q13315,Q13535,Q13746,Q14061,Q14191,Q14695,Q14999,Q15486,Q15648,Q16363,Q16665,Q16666,Q53FC7,Q8IWT3,Q8N2W9,Q8NA92,Q8TBK6,Q8WWV6,Q92831,Q92922,Q96EB6,Q96M61,…	Q07817	0	headandneck,lung,esophagusstomach,skin,ovaryfallopiantube,bowel,breast,pancreas	headandneck,lung,esophagusstomach,ovaryfallopiantube,cnsbrain,uterus,bowel	5
TP53	P04637	R342	D281	O14641,O43261,O43524,O75925,O75928,O96017,P04637,P08047,P08238,P09874,P0CG48,P11142,P11274,P13497,P16885,P17028,P17844,P19338,P20073,P29590,P38398,P38646,P42858,P43356,P48643,P51587,P53350,P54132,P60953,P62987,P63279,P67870,P78527,Q05086,Q12873,Q13315,Q13535,Q13746,Q14061,Q14191,Q14695,Q14999,Q15486,Q15648,Q16363,Q16665,Q16666,Q53FC7,Q8IWT3,Q8N2W9,Q8NA92,Q8TBK6,Q8WWV6,Q92831,Q92922,Q96EB6,Q96M61,…	Q8WUF5	0	headandneck,lung,esophagusstomach,skin,ovaryfallopiantube,bowel,breast,pancreas	lung,cnsbrain	1
TP53	P04637	R342	R337	O14641,O43261,O43524,O75925,O75928,O96017,P04637,P08047,P08238,P09874,P0CG48,P11142,P11274,P13497,P16885,P17028,P17844,P19338,P20073,P29590,P38398,P38646,P42858,P43356,P48643,P51587,P53350,P54132,P60953,P62987,P63279,P67870,P78527,Q05086,Q12873,Q13315,Q13535,Q13746,Q14061,Q14191,Q14695,Q14999,Q15486,Q15648,Q16363,Q16665,Q16666,Q53FC7,Q8IWT3,Q8N2W9,Q8NA92,Q8TBK6,Q8WWV6,Q92831,Q92922,Q96EB6,Q96M61,…	O14641,O43261,O43524,O75925,O75928,O96017,P04637,P08047,P08238,P09874,P0CG48,P11142,P11274,P13497,P16885,P17028,P17844,P19338,P20073,P29590,P38398,P38646,P42858,P43356,P48643,P51587,P53350,P54132,P60953,P62987,P63279,P67870,P78527,Q05086,Q12873,Q13315,Q13535,Q13746,Q14061,Q14191,Q14695,Q14999,Q15486,Q15648,Q16363,Q16665,Q16666,Q53FC7,Q8IWT3,Q8N2W9,Q8NA92,Q8TBK6,Q8WWV6,Q92831,Q92922,Q96EB6,Q96M61,…	1	headandneck,lung,esophagusstomach,skin,ovaryfallopiantube,bowel,breast,pancreas	breast,lung	2
TP53	P04637	R342	L130	O14641,O43261,O43524,O75925,O75928,O96017,P04637,P08047,P08238,P09874,P0CG48,P11142,P11274,P13497,P16885,P17028,P17844,P19338,P20073,P29590,P38398,P38646,P42858,P43356,P48643,P51587,P53350,P54132,P60953,P62987,P63279,P67870,P78527,Q05086,Q12873,Q13315,Q13535,Q13746,Q14061,Q14191,Q14695,Q14999,Q15486,Q15648,Q16363,Q16665,Q16666,Q53FC7,Q8IWT3,Q8N2W9,Q8NA92,Q8TBK6,Q8WWV6,Q92831,Q92922,Q96EB6,Q96M61,…	O14641,O43261,O43524,O75925,O75928,O96017,P04637,P08047,P08238,P09874,P0CG48,P11142,P11274,P13497,P16885,P17028,P17844,P19338,P20073,P29590,P38398,P38646,P42858,P43356,P48643,P51587,P53350,P54132,P60953,P62987,P63279,P67870,P78527,Q05086,Q12873,Q13315,Q13535,Q13746,Q14061,Q14191,Q14695,Q14999,Q15486,Q15648,Q16363,Q16665,Q16666,Q53FC7,Q8IWT3,Q8N2W9,Q8NA92,Q8TBK6,Q8WWV6,Q92831,Q92922,Q96EB6,Q96M61,…	1	headandneck,lung,esophagusstomach,skin,ovaryfallopiantube,bowel,breast,pancreas	cnsbrain	0
TP53	P04637	R342	Q331	O14641,O43261,O43524,O75925,O75928,O96017,P04637,P08047,P08238,P09874,P0CG48,P11142,P11274,P13497,P16885,P17028,P17844,P19338,P20073,P29590,P38398,P38646,P42858,P43356,P48643,P51587,P53350,P54132,P60953,P62987,P63279,P67870,P78527,Q05086,Q12873,Q13315,Q13535,Q13746,Q14061,Q14191,Q14695,Q14999,Q15486,Q15648,Q16363,Q16665,Q16666,Q53FC7,Q8IWT3,Q8N2W9,Q8NA92,Q8TBK6,Q8WWV6,Q92831,Q92922,Q96EB6,Q96M61,…	O14641,O43261,O43524,O75925,O75928,O96017,P04637,P08047,P08238,P09874,P0CG48,P11142,P11274,P13497,P16885,P17028,P17844,P19338,P20073,P29590,P38398,P38646,P42858,P43356,P48643,P51587,P53350,P54132,P60953,P62987,P63279,P67870,P78527,Q05086,Q12873,Q13315,Q13535,Q13746,Q14061,Q14191,Q14695,Q14999,Q15486,Q15648,Q16363,Q16665,Q16666,Q53FC7,Q8IWT3,Q8N2W9,Q8NA92,Q8TBK6,Q8WWV6,Q92831,Q92922,Q96EB6,Q96M61,…	1	headandneck,lung,esophagusstomach,skin,ovaryfallopiantube,bowel,breast,pancreas	lung	1
TP53	P04637	R249	M237	P04637,Q12888,Q13625	Q07817	0	headandneck,lung,esophagusstomach,cnsbrain,breast,liver	headandneck,lung,esophagusstomach,ovaryfallopiantube,cnsbrain,uterus,bowel	4
TP53	P04637	R249	D281	P04637,Q12888,Q13625	Q8WUF5	0	headandneck,lung,esophagusstomach,cnsbrain,breast,liver	lung,cnsbrain	2
TP53	P04637	Y205	M237	O14641,O43261,O43524,O75925,O75928,O96017,P04637,P08047,P08238,P09874,P0CG48,P11142,P11274,P13497,P16885,P17028,P17844,P19338,P20073,P29590,P38398,P38646,P42858,P48643,P51587,P53350,P54132,P60953,P62987,P63279,P67870,P78527,Q05086,Q12873,Q13315,Q13535,Q13746,Q14061,Q14191,Q14695,Q14999,Q15486,Q15648,Q16363,Q16665,Q16666,Q8IWT3,Q8N2W9,Q8NA92,Q8TBK6,Q8WWV6,Q92831,Q92922,Q96EB6,Q96M61,Q9BQA5,Q9BWC9,…	Q07817	0	lung,esophagusstomach,cnsbrain,bowel,breast,pancreas	headandneck,lung,esophagusstomach,ovaryfallopiantube,cnsbrain,uterus,bowel	4
TP53	P04637	Y205	D281	O14641,O43261,O43524,O75925,O75928,O96017,P04637,P08047,P08238,P09874,P0CG48,P11142,P11274,P13497,P16885,P17028,P17844,P19338,P20073,P29590,P38398,P38646,P42858,P48643,P51587,P53350,P54132,P60953,P62987,P63279,P67870,P78527,Q05086,Q12873,Q13315,Q13535,Q13746,Q14061,Q14191,Q14695,Q14999,Q15486,Q15648,Q16363,Q16665,Q16666,Q8IWT3,Q8N2W9,Q8NA92,Q8TBK6,Q8WWV6,Q92831,Q92922,Q96EB6,Q96M61,Q9BQA5,Q9BWC9,…	Q8WUF5	0	lung,esophagusstomach,cnsbrain,bowel,breast,pancreas	lung,cnsbrain	2
TP53	P04637	M237	N239	Q07817	B4DT73,O14641,O43261,O43524,O75925,O75928,O96017,P04637,P08047,P08238,P09874,P0CG48,P11142,P11274,P13497,P16885,P17028,P17844,P19338,P20073,P29590,P35232,P38398,P38646,P42858,P43356,P48643,P51587,P53350,P54132,P60953,P62987,P63279,P67870,P78527,Q05086,Q12873,Q13315,Q13535,Q13625,Q13746,Q14061,Q14191,Q14695,Q14999,Q15486,Q15648,Q15672,Q16363,Q16665,Q16666,Q53FC7,Q541A5,Q8IWT3,Q8N2W9,Q8NA92,Q8NHY2,…	0	headandneck,lung,esophagusstomach,ovaryfallopiantube,cnsbrain,uterus,bowel	breast,headandneck,lung,uterus	3
TP53	P04637	M237	C242	Q07817	P04637	0	headandneck,lung,esophagusstomach,ovaryfallopiantube,cnsbrain,uterus,bowel	headandneck,lung,uterus,bowel,breast	4
TP53	P04637	M237	G244	Q07817	B4DT73,O00231,O14641,O14757,O14920,O15126,O43261,O43524,O43741,O60341,O75925,O75928,O95376,O95816,O96017,P00491,P02749,P04183,P04637,P04792,P05109,P08047,P08238,P09874,P0CG48,P10415,P11142,P11274,P12429,P13497,P13693,P16885,P17028,P17844,P18283,P18754,P19338,P20073,P20338,P21673,P24522,P27695,P28482,P29590,P36405,P38398,P38646,P42224,P42771,P42773,P42858,P43356,P45983,P45984,P46108,P48643,P49841,…	0	headandneck,lung,esophagusstomach,ovaryfallopiantube,cnsbrain,uterus,bowel	esophagusstomach,cnsbrain,lung,ovaryfallopiantube	4
TP53	P04637	M237	E286	Q07817	O14641,O43261,O43524,O75925,O75928,P04637,P08047,P09874,P0CG48,P11274,P13497,P16885,P17028,P19338,P29590,P38398,P42858,P48643,P51587,P53350,P54132,P78527,Q05086,Q12873,Q13315,Q13535,Q13746,Q14191,Q14695,Q14999,Q15648,Q16363,Q16665,Q16666,Q8IWT3,Q8NA92,Q8TBK6,Q8WWV6,Q92831,Q92922,Q96EB6,Q9BQA5,Q9BWC9,Q9BX70,Q9C0J8,Q9H2X6,Q9H4B4,Q9H9B1,Q9NS56,Q9UER7,Q9UKY1,Q9UN74,Q9Y2A0,Q9Y675	0	headandneck,lung,esophagusstomach,ovaryfallopiantube,cnsbrain,uterus,bowel	lung,esophagusstomach,skin,bowel,breast	3
TP53	P04637	M237	D281	Q07817	Q8WUF5	0	headandneck,lung,esophagusstomach,ovaryfallopiantube,cnsbrain,uterus,bowel	lung,cnsbrain	2
TP53	P04637	M237	R337	Q07817	O14641,O43261,O43524,O75925,O75928,O96017,P04637,P08047,P08238,P09874,P0CG48,P11142,P11274,P13497,P16885,P17028,P17844,P19338,P20073,P29590,P38398,P38646,P42858,P43356,P48643,P51587,P53350,P54132,P60953,P62987,P63279,P67870,P78527,Q05086,Q12873,Q13315,Q13535,Q13746,Q14061,Q14191,Q14695,Q14999,Q15486,Q15648,Q16363,Q16665,Q16666,Q53FC7,Q8IWT3,Q8N2W9,Q8NA92,Q8TBK6,Q8WWV6,Q92831,Q92922,Q96EB6,Q96M61,…	0	headandneck,lung,esophagusstomach,ovaryfallopiantube,cnsbrain,uterus,bowel	breast,lung	1
TP53	P04637	M237	R110	Q07817	O14641,O43261,O43524,O75925,O75928,P04637,P08047,P09874,P0CG48,P11274,P13497,P16885,P17028,P19338,P29590,P38398,P42858,P48643,P51587,P53350,P54132,P78527,Q05086,Q12873,Q13315,Q13535,Q13746,Q14191,Q14695,Q14999,Q15648,Q16363,Q16665,Q16666,Q8IWT3,Q8NA92,Q8TBK6,Q8WWV6,Q92831,Q92922,Q96EB6,Q9BQA5,Q9BWC9,Q9BX70,Q9C0J8,Q9H2X6,Q9H4B4,Q9H9B1,Q9NS56,Q9UER7,Q9UKY1,Q9UN74,Q9Y2A0,Q9Y675	0	headandneck,lung,esophagusstomach,ovaryfallopiantube,cnsbrain,uterus,bowel	lung	1
TP53	P04637	M237	L130	Q07817	O14641,O43261,O43524,O75925,O75928,O96017,P04637,P08047,P08238,P09874,P0CG48,P11142,P11274,P13497,P16885,P17028,P17844,P19338,P20073,P29590,P38398,P38646,P42858,P43356,P48643,P51587,P53350,P54132,P60953,P62987,P63279,P67870,P78527,Q05086,Q12873,Q13315,Q13535,Q13746,Q14061,Q14191,Q14695,Q14999,Q15486,Q15648,Q16363,Q16665,Q16666,Q53FC7,Q8IWT3,Q8N2W9,Q8NA92,Q8TBK6,Q8WWV6,Q92831,Q92922,Q96EB6,Q96M61,…	0	headandneck,lung,esophagusstomach,ovaryfallopiantube,cnsbrain,uterus,bowel	cnsbrain	1
TP53	P04637	M237	P152	Q07817	O14641,O43261,O43524,O75925,O75928,P04637,P08047,P09874,P0CG48,P11274,P13497,P16885,P17028,P19338,P29590,P38398,P42858,P48643,P51587,P53350,P54132,P78527,Q05086,Q12873,Q12888,Q13315,Q13535,Q13746,Q14191,Q14695,Q14999,Q15648,Q16363,Q16665,Q16666,Q8IWT3,Q8NA92,Q8TBK6,Q8WWV6,Q92831,Q92922,Q96EB6,Q9BQA5,Q9BWC9,Q9BX70,Q9C0J8,Q9H2X6,Q9H4B4,Q9H9B1,Q9NS56,Q9UER7,Q9UKY1,Q9UN74,Q9Y2A0,Q9Y675	0	headandneck,lung,esophagusstomach,ovaryfallopiantube,cnsbrain,uterus,bowel	bowel	1
TP53	P04637	M237	H168	Q07817	O14641,O43261,O43524,O75925,O75928,P04637,P08047,P09874,P0CG48,P11274,P13497,P16885,P17028,P19338,P29590,P38398,P42858,P48643,P51587,P53350,P54132,P78527,Q05086,Q12873,Q12888,Q13315,Q13535,Q13625,Q13746,Q14191,Q14695,Q14999,Q15648,Q16363,Q16665,Q16666,Q8IWT3,Q8NA92,Q8TBK6,Q8WUF5,Q8WWV6,Q92831,Q92922,Q96EB6,Q9BQA5,Q9BWC9,Q9BX70,Q9C0J8,Q9H2X6,Q9H4B4,Q9H9B1,Q9NS56,Q9UER7,Q9UKY1,Q9UN74,Q9Y2A0,Q9Y675	0	headandneck,lung,esophagusstomach,ovaryfallopiantube,cnsbrain,uterus,bowel	bowel	1
TP53	P04637	M237	R267	Q07817	P04637	0	headandneck,lung,esophagusstomach,ovaryfallopiantube,cnsbrain,uterus,bowel	lung	1
TP53	P04637	M237	K164	Q07817	B4DT73,O00231,O14641,O14757,O14920,O15126,O43261,O43524,O43741,O60341,O75925,O75928,O95376,O95816,O96017,P00491,P02749,P04637,P05109,P08047,P08238,P09874,P0CG48,P10415,P11142,P11274,P13497,P13693,P16885,P17028,P17844,P18283,P19338,P20073,P21673,P24522,P27695,P28482,P29590,P36405,P38398,P38646,P42224,P42771,P42773,P42858,P43356,P45983,P45984,P46108,P48643,P49841,P49888,P50453,P51587,P53350,P54132,…	0	headandneck,lung,esophagusstomach,ovaryfallopiantube,cnsbrain,uterus,bowel	lung	1
TP53	P04637	M237	G105	Q07817	O14641,O43261,O43524,O75925,O75928,P04637,P08047,P09874,P0CG48,P11274,P13497,P16885,P17028,P19338,P29590,P38398,P42858,P48643,P51587,P53350,P54132,P78527,Q05086,Q12873,Q12888,Q13315,Q13535,Q13746,Q14191,Q14695,Q14999,Q15648,Q16363,Q16665,Q16666,Q8IWT3,Q8NA92,Q8TBK6,Q8WWV6,Q92831,Q92922,Q96EB6,Q9BQA5,Q9BWC9,Q9BX70,Q9C0J8,Q9H2X6,Q9H4B4,Q9H9B1,Q9NS56,Q9UER7,Q9UKY1,Q9UN74,Q9Y2A0,Q9Y675	0	headandneck,lung,esophagusstomach,ovaryfallopiantube,cnsbrain,uterus,bowel	lung	1
TP53	P04637	M237	V172	Q07817	P04637,Q12888	0	headandneck,lung,esophagusstomach,ovaryfallopiantube,cnsbrain,uterus,bowel	lung	1
TP53	P04637	M237	Q331	Q07817	O14641,O43261,O43524,O75925,O75928,O96017,P04637,P08047,P08238,P09874,P0CG48,P11142,P11274,P13497,P16885,P17028,P17844,P19338,P20073,P29590,P38398,P38646,P42858,P43356,P48643,P51587,P53350,P54132,P60953,P62987,P63279,P67870,P78527,Q05086,Q12873,Q13315,Q13535,Q13746,Q14061,Q14191,Q14695,Q14999,Q15486,Q15648,Q16363,Q16665,Q16666,Q53FC7,Q8IWT3,Q8N2W9,Q8NA92,Q8TBK6,Q8WWV6,Q92831,Q92922,Q96EB6,Q96M61,…	0	headandneck,lung,esophagusstomach,ovaryfallopiantube,cnsbrain,uterus,bowel	lung	1
TP53	P04637	M237	N131	Q07817	O14641,O14757,O14920,O43261,O43524,O75925,O75928,P04637,P08047,P09874,P0CG48,P11274,P13497,P16885,P17028,P19338,P29590,P38398,P42858,P48643,P51587,P53350,P54132,P78527,Q05086,Q12873,Q13315,Q13535,Q13746,Q14191,Q14695,Q14999,Q15648,Q16363,Q16665,Q16666,Q8IWT3,Q8NA92,Q8TBK6,Q8WWV6,Q92831,Q92922,Q96EB6,Q9BQA5,Q9BWC9,Q9BX70,Q9C0J8,Q9H2X6,Q9H4B4,Q9H9B1,Q9NS56,Q9UER7,Q9UKY1,Q9UN74,Q9Y2A0,Q9Y675	0	headandneck,lung,esophagusstomach,ovaryfallopiantube,cnsbrain,uterus,bowel	lung	1
TP53	P04637	M237	G262	Q07817	O14641,O14757,O43261,O43524,O75925,O75928,P04637,P08047,P09874,P0CG48,P11274,P13497,P16885,P17028,P19338,P29590,P38398,P42224,P42858,P46108,P48643,P51587,P53350,P54132,P78527,Q05086,Q12873,Q13315,Q13535,Q13746,Q14191,Q14695,Q14999,Q15648,Q16363,Q16665,Q16666,Q8IWT3,Q8NA92,Q8TBK6,Q8WWV6,Q92831,Q92922,Q96EB6,Q9BQA5,Q9BWC9,Q9BX70,Q9C0J8,Q9H2X6,Q9H4B4,Q9H9B1,Q9NS56,Q9UER7,Q9UKY1,Q9UN74,Q9Y2A0,Q9Y675	0	headandneck,lung,esophagusstomach,ovaryfallopiantube,cnsbrain,uterus,bowel	uterus	1
TP53	P04637	M237	N247	Q07817	B4DT73,O00231,O14641,O14757,O14920,O15126,O43261,O43524,O43741,O60341,O75925,O75928,O95376,O95816,O96017,P00491,P02749,P04183,P04637,P04792,P05109,P08047,P08238,P09874,P0CG48,P10415,P11142,P11274,P12429,P13497,P13693,P16885,P17028,P17844,P18283,P18754,P19338,P20073,P20338,P21673,P24522,P27695,P28482,P29590,P36405,P38398,P38646,P42224,P42771,P42773,P42858,P43356,P45983,P45984,P46108,P48643,P49841,…	0	headandneck,lung,esophagusstomach,ovaryfallopiantube,cnsbrain,uterus,bowel	skin	0
TP53	P04637	M237	Y107	Q07817	O14641,O43261,O43524,O75925,O75928,P04637,P08047,P09874,P0CG48,P11274,P13497,P16885,P17028,P19338,P29590,P38398,P42858,P48643,P51587,P53350,P54132,P78527,Q05086,Q12873,Q12888,Q13315,Q13535,Q13746,Q14191,Q14695,Q14999,Q15648,Q16363,Q16665,Q16666,Q8IWT3,Q8NA92,Q8TBK6,Q8WWV6,Q92831,Q92922,Q96EB6,Q9BQA5,Q9BWC9,Q9BX70,Q9C0J8,Q9H2X6,Q9H4B4,Q9H9B1,Q9NS56,Q9UER7,Q9UKY1,Q9UN74,Q9Y2A0,Q9Y675	0	headandneck,lung,esophagusstomach,ovaryfallopiantube,cnsbrain,uterus,bowel	breast	0
TP53	P04637	M237	P190	Q07817	O14641,O43261,O43524,O75925,O75928,P04637,P08047,P09874,P0CG48,P11274,P13497,P16885,P17028,P19338,P29590,P38398,P42858,P48643,P51587,P53350,P54132,P78527,Q05086,Q12873,Q13315,Q13535,Q13746,Q14191,Q14695,Q14999,Q15648,Q16363,Q16665,Q16666,Q8IWT3,Q8NA92,Q8TBK6,Q8WWV6,Q92831,Q92922,Q96EB6,Q9BQA5,Q9BWC9,Q9BX70,Q9C0J8,Q9H2X6,Q9H4B4,Q9H9B1,Q9NS56,Q9UER7,Q9UKY1,Q9UN74,Q9Y2A0,Q9Y675	0	headandneck,lung,esophagusstomach,ovaryfallopiantube,cnsbrain,uterus,bowel	bowel	1
TP53	P04637	C242	D281	P04637	Q8WUF5	0	headandneck,lung,uterus,bowel,breast	lung,cnsbrain	1
TP53	P04637	C242	R267	P04637	P04637	1	headandneck,lung,uterus,bowel,breast	lung	1
TP53	P04637	G244	D281	B4DT73,O00231,O14641,O14757,O14920,O15126,O43261,O43524,O43741,O60341,O75925,O75928,O95376,O95816,O96017,P00491,P02749,P04183,P04637,P04792,P05109,P08047,P08238,P09874,P0CG48,P10415,P11142,P11274,P12429,P13497,P13693,P16885,P17028,P17844,P18283,P18754,P19338,P20073,P20338,P21673,P24522,P27695,P28482,P29590,P36405,P38398,P38646,P42224,P42771,P42773,P42858,P43356,P45983,P45984,P46108,P48643,P49841,…	Q8WUF5	0	esophagusstomach,cnsbrain,lung,ovaryfallopiantube	lung,cnsbrain	2
TP53	P04637	E286	D281	O14641,O43261,O43524,O75925,O75928,P04637,P08047,P09874,P0CG48,P11274,P13497,P16885,P17028,P19338,P29590,P38398,P42858,P48643,P51587,P53350,P54132,P78527,Q05086,Q12873,Q13315,Q13535,Q13746,Q14191,Q14695,Q14999,Q15648,Q16363,Q16665,Q16666,Q8IWT3,Q8NA92,Q8TBK6,Q8WWV6,Q92831,Q92922,Q96EB6,Q9BQA5,Q9BWC9,Q9BX70,Q9C0J8,Q9H2X6,Q9H4B4,Q9H9B1,Q9NS56,Q9UER7,Q9UKY1,Q9UN74,Q9Y2A0,Q9Y675	Q8WUF5	0	lung,esophagusstomach,skin,bowel,breast	lung,cnsbrain	1
TP53	P04637	E286	R110	O14641,O43261,O43524,O75925,O75928,P04637,P08047,P09874,P0CG48,P11274,P13497,P16885,P17028,P19338,P29590,P38398,P42858,P48643,P51587,P53350,P54132,P78527,Q05086,Q12873,Q13315,Q13535,Q13746,Q14191,Q14695,Q14999,Q15648,Q16363,Q16665,Q16666,Q8IWT3,Q8NA92,Q8TBK6,Q8WWV6,Q92831,Q92922,Q96EB6,Q9BQA5,Q9BWC9,Q9BX70,Q9C0J8,Q9H2X6,Q9H4B4,Q9H9B1,Q9NS56,Q9UER7,Q9UKY1,Q9UN74,Q9Y2A0,Q9Y675	O14641,O43261,O43524,O75925,O75928,P04637,P08047,P09874,P0CG48,P11274,P13497,P16885,P17028,P19338,P29590,P38398,P42858,P48643,P51587,P53350,P54132,P78527,Q05086,Q12873,Q13315,Q13535,Q13746,Q14191,Q14695,Q14999,Q15648,Q16363,Q16665,Q16666,Q8IWT3,Q8NA92,Q8TBK6,Q8WWV6,Q92831,Q92922,Q96EB6,Q9BQA5,Q9BWC9,Q9BX70,Q9C0J8,Q9H2X6,Q9H4B4,Q9H9B1,Q9NS56,Q9UER7,Q9UKY1,Q9UN74,Q9Y2A0,Q9Y675	1	lung,esophagusstomach,skin,bowel,breast	lung	1
TP53	P04637	E286	P190	O14641,O43261,O43524,O75925,O75928,P04637,P08047,P09874,P0CG48,P11274,P13497,P16885,P17028,P19338,P29590,P38398,P42858,P48643,P51587,P53350,P54132,P78527,Q05086,Q12873,Q13315,Q13535,Q13746,Q14191,Q14695,Q14999,Q15648,Q16363,Q16665,Q16666,Q8IWT3,Q8NA92,Q8TBK6,Q8WWV6,Q92831,Q92922,Q96EB6,Q9BQA5,Q9BWC9,Q9BX70,Q9C0J8,Q9H2X6,Q9H4B4,Q9H9B1,Q9NS56,Q9UER7,Q9UKY1,Q9UN74,Q9Y2A0,Q9Y675	O14641,O43261,O43524,O75925,O75928,P04637,P08047,P09874,P0CG48,P11274,P13497,P16885,P17028,P19338,P29590,P38398,P42858,P48643,P51587,P53350,P54132,P78527,Q05086,Q12873,Q13315,Q13535,Q13746,Q14191,Q14695,Q14999,Q15648,Q16363,Q16665,Q16666,Q8IWT3,Q8NA92,Q8TBK6,Q8WWV6,Q92831,Q92922,Q96EB6,Q9BQA5,Q9BWC9,Q9BX70,Q9C0J8,Q9H2X6,Q9H4B4,Q9H9B1,Q9NS56,Q9UER7,Q9UKY1,Q9UN74,Q9Y2A0,Q9Y675	1	lung,esophagusstomach,skin,bowel,breast	bowel	1
TP53	P04637	D281	R337	Q8WUF5	O14641,O43261,O43524,O75925,O75928,O96017,P04637,P08047,P08238,P09874,P0CG48,P11142,P11274,P13497,P16885,P17028,P17844,P19338,P20073,P29590,P38398,P38646,P42858,P43356,P48643,P51587,P53350,P54132,P60953,P62987,P63279,P67870,P78527,Q05086,Q12873,Q13315,Q13535,Q13746,Q14061,Q14191,Q14695,Q14999,Q15486,Q15648,Q16363,Q16665,Q16666,Q53FC7,Q8IWT3,Q8N2W9,Q8NA92,Q8TBK6,Q8WWV6,Q92831,Q92922,Q96EB6,Q96M61,…	0	lung,cnsbrain	breast,lung	1
TP53	P04637	D281	R110	Q8WUF5	O14641,O43261,O43524,O75925,O75928,P04637,P08047,P09874,P0CG48,P11274,P13497,P16885,P17028,P19338,P29590,P38398,P42858,P48643,P51587,P53350,P54132,P78527,Q05086,Q12873,Q13315,Q13535,Q13746,Q14191,Q14695,Q14999,Q15648,Q16363,Q16665,Q16666,Q8IWT3,Q8NA92,Q8TBK6,Q8WWV6,Q92831,Q92922,Q96EB6,Q9BQA5,Q9BWC9,Q9BX70,Q9C0J8,Q9H2X6,Q9H4B4,Q9H9B1,Q9NS56,Q9UER7,Q9UKY1,Q9UN74,Q9Y2A0,Q9Y675	0	lung,cnsbrain	lung	1
TP53	P04637	D281	Q136	Q8WUF5	O14641,O43261,O43524,O75925,O75928,O96017,P04637,P08047,P08238,P09874,P0CG48,P11142,P11274,P13497,P16885,P17028,P17844,P19338,P20073,P29590,P38398,P38646,P42858,P48643,P51587,P53350,P54132,P60953,P62987,P63279,P67870,P78527,Q05086,Q07817,Q12873,Q13315,Q13535,Q13746,Q14061,Q14191,Q14695,Q14999,Q15486,Q15648,Q16363,Q16665,Q16666,Q8IWT3,Q8N2W9,Q8NA92,Q8TBK6,Q8WWV6,Q92831,Q92922,Q96EB6,Q96M61,Q9BQA5,…	0	lung,cnsbrain	breast,headandneck,cnsbrain	1
TP53	P04637	D281	C277	Q8WUF5	A8K1F4,B4DT73,O00231,O14757,O14920,O15126,O43741,O60341,O95376,O95816,O96017,P00491,P02749,P04183,P04637,P04792,P05109,P06748,P08238,P10415,P11142,P12429,P13693,P16885,P17844,P18283,P18754,P18847,P20042,P20073,P20338,P21673,P24522,P27695,P28482,P29590,P35232,P36405,P38646,P38936,P42224,P42771,P42773,P43356,P45983,P45984,P46108,P49841,P49888,P50453,P55774,P60953,P61224,P62136,P62328,P62987,P63162,…	0	lung,cnsbrain	lung	1
TP53	P04637	D281	L130	Q8WUF5	O14641,O43261,O43524,O75925,O75928,O96017,P04637,P08047,P08238,P09874,P0CG48,P11142,P11274,P13497,P16885,P17028,P17844,P19338,P20073,P29590,P38398,P38646,P42858,P43356,P48643,P51587,P53350,P54132,P60953,P62987,P63279,P67870,P78527,Q05086,Q12873,Q13315,Q13535,Q13746,Q14061,Q14191,Q14695,Q14999,Q15486,Q15648,Q16363,Q16665,Q16666,Q53FC7,Q8IWT3,Q8N2W9,Q8NA92,Q8TBK6,Q8WWV6,Q92831,Q92922,Q96EB6,Q96M61,…	0	lung,cnsbrain	cnsbrain	1
TP53	P04637	D281	P152	Q8WUF5	O14641,O43261,O43524,O75925,O75928,P04637,P08047,P09874,P0CG48,P11274,P13497,P16885,P17028,P19338,P29590,P38398,P42858,P48643,P51587,P53350,P54132,P78527,Q05086,Q12873,Q12888,Q13315,Q13535,Q13746,Q14191,Q14695,Q14999,Q15648,Q16363,Q16665,Q16666,Q8IWT3,Q8NA92,Q8TBK6,Q8WWV6,Q92831,Q92922,Q96EB6,Q9BQA5,Q9BWC9,Q9BX70,Q9C0J8,Q9H2X6,Q9H4B4,Q9H9B1,Q9NS56,Q9UER7,Q9UKY1,Q9UN74,Q9Y2A0,Q9Y675	0	lung,cnsbrain	bowel	0
TP53	P04637	D281	R267	Q8WUF5	P04637	0	lung,cnsbrain	lung	1
TP53	P04637	D281	K164	Q8WUF5	B4DT73,O00231,O14641,O14757,O14920,O15126,O43261,O43524,O43741,O60341,O75925,O75928,O95376,O95816,O96017,P00491,P02749,P04637,P05109,P08047,P08238,P09874,P0CG48,P10415,P11142,P11274,P13497,P13693,P16885,P17028,P17844,P18283,P19338,P20073,P21673,P24522,P27695,P28482,P29590,P36405,P38398,P38646,P42224,P42771,P42773,P42858,P43356,P45983,P45984,P46108,P48643,P49841,P49888,P50453,P51587,P53350,P54132,…	0	lung,cnsbrain	lung	1
TP53	P04637	D281	G105	Q8WUF5	O14641,O43261,O43524,O75925,O75928,P04637,P08047,P09874,P0CG48,P11274,P13497,P16885,P17028,P19338,P29590,P38398,P42858,P48643,P51587,P53350,P54132,P78527,Q05086,Q12873,Q12888,Q13315,Q13535,Q13746,Q14191,Q14695,Q14999,Q15648,Q16363,Q16665,Q16666,Q8IWT3,Q8NA92,Q8TBK6,Q8WWV6,Q92831,Q92922,Q96EB6,Q9BQA5,Q9BWC9,Q9BX70,Q9C0J8,Q9H2X6,Q9H4B4,Q9H9B1,Q9NS56,Q9UER7,Q9UKY1,Q9UN74,Q9Y2A0,Q9Y675	0	lung,cnsbrain	lung	1
TP53	P04637	D281	V172	Q8WUF5	P04637,Q12888	0	lung,cnsbrain	lung	1
TP53	P04637	D281	Q331	Q8WUF5	O14641,O43261,O43524,O75925,O75928,O96017,P04637,P08047,P08238,P09874,P0CG48,P11142,P11274,P13497,P16885,P17028,P17844,P19338,P20073,P29590,P38398,P38646,P42858,P43356,P48643,P51587,P53350,P54132,P60953,P62987,P63279,P67870,P78527,Q05086,Q12873,Q13315,Q13535,Q13746,Q14061,Q14191,Q14695,Q14999,Q15486,Q15648,Q16363,Q16665,Q16666,Q53FC7,Q8IWT3,Q8N2W9,Q8NA92,Q8TBK6,Q8WWV6,Q92831,Q92922,Q96EB6,Q96M61,…	0	lung,cnsbrain	lung	1
TP53	P04637	D281	N131	Q8WUF5	O14641,O14757,O14920,O43261,O43524,O75925,O75928,P04637,P08047,P09874,P0CG48,P11274,P13497,P16885,P17028,P19338,P29590,P38398,P42858,P48643,P51587,P53350,P54132,P78527,Q05086,Q12873,Q13315,Q13535,Q13746,Q14191,Q14695,Q14999,Q15648,Q16363,Q16665,Q16666,Q8IWT3,Q8NA92,Q8TBK6,Q8WWV6,Q92831,Q92922,Q96EB6,Q9BQA5,Q9BWC9,Q9BX70,Q9C0J8,Q9H2X6,Q9H4B4,Q9H9B1,Q9NS56,Q9UER7,Q9UKY1,Q9UN74,Q9Y2A0,Q9Y675	0	lung,cnsbrain	lung	1
TP53	P04637	D281	G262	Q8WUF5	O14641,O14757,O43261,O43524,O75925,O75928,P04637,P08047,P09874,P0CG48,P11274,P13497,P16885,P17028,P19338,P29590,P38398,P42224,P42858,P46108,P48643,P51587,P53350,P54132,P78527,Q05086,Q12873,Q13315,Q13535,Q13746,Q14191,Q14695,Q14999,Q15648,Q16363,Q16665,Q16666,Q8IWT3,Q8NA92,Q8TBK6,Q8WWV6,Q92831,Q92922,Q96EB6,Q9BQA5,Q9BWC9,Q9BX70,Q9C0J8,Q9H2X6,Q9H4B4,Q9H9B1,Q9NS56,Q9UER7,Q9UKY1,Q9UN74,Q9Y2A0,Q9Y675	0	lung,cnsbrain	uterus	0
TP53	P04637	D281	Y107	Q8WUF5	O14641,O43261,O43524,O75925,O75928,P04637,P08047,P09874,P0CG48,P11274,P13497,P16885,P17028,P19338,P29590,P38398,P42858,P48643,P51587,P53350,P54132,P78527,Q05086,Q12873,Q12888,Q13315,Q13535,Q13746,Q14191,Q14695,Q14999,Q15648,Q16363,Q16665,Q16666,Q8IWT3,Q8NA92,Q8TBK6,Q8WWV6,Q92831,Q92922,Q96EB6,Q9BQA5,Q9BWC9,Q9BX70,Q9C0J8,Q9H2X6,Q9H4B4,Q9H9B1,Q9NS56,Q9UER7,Q9UKY1,Q9UN74,Q9Y2A0,Q9Y675	0	lung,cnsbrain	breast	0
TP53	P04637	D281	K120	Q8WUF5	A8K1F4,B4DT73,O00231,O14641,O14757,O14920,O15126,O43261,O43524,O43741,O60341,O75925,O75928,O95376,O95816,O96017,P00491,P02749,P04183,P04637,P04792,P05109,P06748,P08047,P08238,P09874,P0CG48,P10415,P11142,P11274,P12429,P13497,P13693,P16885,P17028,P17844,P18283,P18754,P18847,P19338,P20042,P20073,P20338,P21673,P24522,P27695,P28482,P29590,P35232,P36405,P38398,P38646,P38936,P42224,P42771,P42773,P42858,…	0	lung,cnsbrain	cnsbrain	1
TP53	P04637	D281	P190	Q8WUF5	O14641,O43261,O43524,O75925,O75928,P04637,P08047,P09874,P0CG48,P11274,P13497,P16885,P17028,P19338,P29590,P38398,P42858,P48643,P51587,P53350,P54132,P78527,Q05086,Q12873,Q13315,Q13535,Q13746,Q14191,Q14695,Q14999,Q15648,Q16363,Q16665,Q16666,Q8IWT3,Q8NA92,Q8TBK6,Q8WWV6,Q92831,Q92922,Q96EB6,Q9BQA5,Q9BWC9,Q9BX70,Q9C0J8,Q9H2X6,Q9H4B4,Q9H9B1,Q9NS56,Q9UER7,Q9UKY1,Q9UN74,Q9Y2A0,Q9Y675	0	lung,cnsbrain	bowel	0
TP53	P04637	R337	L130	O14641,O43261,O43524,O75925,O75928,O96017,P04637,P08047,P08238,P09874,P0CG48,P11142,P11274,P13497,P16885,P17028,P17844,P19338,P20073,P29590,P38398,P38646,P42858,P43356,P48643,P51587,P53350,P54132,P60953,P62987,P63279,P67870,P78527,Q05086,Q12873,Q13315,Q13535,Q13746,Q14061,Q14191,Q14695,Q14999,Q15486,Q15648,Q16363,Q16665,Q16666,Q53FC7,Q8IWT3,Q8N2W9,Q8NA92,Q8TBK6,Q8WWV6,Q92831,Q92922,Q96EB6,Q96M61,…	O14641,O43261,O43524,O75925,O75928,O96017,P04637,P08047,P08238,P09874,P0CG48,P11142,P11274,P13497,P16885,P17028,P17844,P19338,P20073,P29590,P38398,P38646,P42858,P43356,P48643,P51587,P53350,P54132,P60953,P62987,P63279,P67870,P78527,Q05086,Q12873,Q13315,Q13535,Q13746,Q14061,Q14191,Q14695,Q14999,Q15486,Q15648,Q16363,Q16665,Q16666,Q53FC7,Q8IWT3,Q8N2W9,Q8NA92,Q8TBK6,Q8WWV6,Q92831,Q92922,Q96EB6,Q96M61,…	1	breast,lung	cnsbrain	0
TP53	P04637	R337	Q331	O14641,O43261,O43524,O75925,O75928,O96017,P04637,P08047,P08238,P09874,P0CG48,P11142,P11274,P13497,P16885,P17028,P17844,P19338,P20073,P29590,P38398,P38646,P42858,P43356,P48643,P51587,P53350,P54132,P60953,P62987,P63279,P67870,P78527,Q05086,Q12873,Q13315,Q13535,Q13746,Q14061,Q14191,Q14695,Q14999,Q15486,Q15648,Q16363,Q16665,Q16666,Q53FC7,Q8IWT3,Q8N2W9,Q8NA92,Q8TBK6,Q8WWV6,Q92831,Q92922,Q96EB6,Q96M61,…	O14641,O43261,O43524,O75925,O75928,O96017,P04637,P08047,P08238,P09874,P0CG48,P11142,P11274,P13497,P16885,P17028,P17844,P19338,P20073,P29590,P38398,P38646,P42858,P43356,P48643,P51587,P53350,P54132,P60953,P62987,P63279,P67870,P78527,Q05086,Q12873,Q13315,Q13535,Q13746,Q14061,Q14191,Q14695,Q14999,Q15486,Q15648,Q16363,Q16665,Q16666,Q53FC7,Q8IWT3,Q8N2W9,Q8NA92,Q8TBK6,Q8WWV6,Q92831,Q92922,Q96EB6,Q96M61,…	1	breast,lung	lung	1
TP53	P04637	R110	P190	O14641,O43261,O43524,O75925,O75928,P04637,P08047,P09874,P0CG48,P11274,P13497,P16885,P17028,P19338,P29590,P38398,P42858,P48643,P51587,P53350,P54132,P78527,Q05086,Q12873,Q13315,Q13535,Q13746,Q14191,Q14695,Q14999,Q15648,Q16363,Q16665,Q16666,Q8IWT3,Q8NA92,Q8TBK6,Q8WWV6,Q92831,Q92922,Q96EB6,Q9BQA5,Q9BWC9,Q9BX70,Q9C0J8,Q9H2X6,Q9H4B4,Q9H9B1,Q9NS56,Q9UER7,Q9UKY1,Q9UN74,Q9Y2A0,Q9Y675	O14641,O43261,O43524,O75925,O75928,P04637,P08047,P09874,P0CG48,P11274,P13497,P16885,P17028,P19338,P29590,P38398,P42858,P48643,P51587,P53350,P54132,P78527,Q05086,Q12873,Q13315,Q13535,Q13746,Q14191,Q14695,Q14999,Q15648,Q16363,Q16665,Q16666,Q8IWT3,Q8NA92,Q8TBK6,Q8WWV6,Q92831,Q92922,Q96EB6,Q9BQA5,Q9BWC9,Q9BX70,Q9C0J8,Q9H2X6,Q9H4B4,Q9H9B1,Q9NS56,Q9UER7,Q9UKY1,Q9UN74,Q9Y2A0,Q9Y675	1	lung	bowel	0
TP53	P04637	L130	Q331	O14641,O43261,O43524,O75925,O75928,O96017,P04637,P08047,P08238,P09874,P0CG48,P11142,P11274,P13497,P16885,P17028,P17844,P19338,P20073,P29590,P38398,P38646,P42858,P43356,P48643,P51587,P53350,P54132,P60953,P62987,P63279,P67870,P78527,Q05086,Q12873,Q13315,Q13535,Q13746,Q14061,Q14191,Q14695,Q14999,Q15486,Q15648,Q16363,Q16665,Q16666,Q53FC7,Q8IWT3,Q8N2W9,Q8NA92,Q8TBK6,Q8WWV6,Q92831,Q92922,Q96EB6,Q96M61,…	O14641,O43261,O43524,O75925,O75928,O96017,P04637,P08047,P08238,P09874,P0CG48,P11142,P11274,P13497,P16885,P17028,P17844,P19338,P20073,P29590,P38398,P38646,P42858,P43356,P48643,P51587,P53350,P54132,P60953,P62987,P63279,P67870,P78527,Q05086,Q12873,Q13315,Q13535,Q13746,Q14061,Q14191,Q14695,Q14999,Q15486,Q15648,Q16363,Q16665,Q16666,Q53FC7,Q8IWT3,Q8N2W9,Q8NA92,Q8TBK6,Q8WWV6,Q92831,Q92922,Q96EB6,Q96M61,…	1	cnsbrain	lung	0
TP53	P04637	P152	G105	O14641,O43261,O43524,O75925,O75928,P04637,P08047,P09874,P0CG48,P11274,P13497,P16885,P17028,P19338,P29590,P38398,P42858,P48643,P51587,P53350,P54132,P78527,Q05086,Q12873,Q12888,Q13315,Q13535,Q13746,Q14191,Q14695,Q14999,Q15648,Q16363,Q16665,Q16666,Q8IWT3,Q8NA92,Q8TBK6,Q8WWV6,Q92831,Q92922,Q96EB6,Q9BQA5,Q9BWC9,Q9BX70,Q9C0J8,Q9H2X6,Q9H4B4,Q9H9B1,Q9NS56,Q9UER7,Q9UKY1,Q9UN74,Q9Y2A0,Q9Y675	O14641,O43261,O43524,O75925,O75928,P04637,P08047,P09874,P0CG48,P11274,P13497,P16885,P17028,P19338,P29590,P38398,P42858,P48643,P51587,P53350,P54132,P78527,Q05086,Q12873,Q12888,Q13315,Q13535,Q13746,Q14191,Q14695,Q14999,Q15648,Q16363,Q16665,Q16666,Q8IWT3,Q8NA92,Q8TBK6,Q8WWV6,Q92831,Q92922,Q96EB6,Q9BQA5,Q9BWC9,Q9BX70,Q9C0J8,Q9H2X6,Q9H4B4,Q9H9B1,Q9NS56,Q9UER7,Q9UKY1,Q9UN74,Q9Y2A0,Q9Y675	1	bowel	lung	0
TP53	P04637	P152	Y107	O14641,O43261,O43524,O75925,O75928,P04637,P08047,P09874,P0CG48,P11274,P13497,P16885,P17028,P19338,P29590,P38398,P42858,P48643,P51587,P53350,P54132,P78527,Q05086,Q12873,Q12888,Q13315,Q13535,Q13746,Q14191,Q14695,Q14999,Q15648,Q16363,Q16665,Q16666,Q8IWT3,Q8NA92,Q8TBK6,Q8WWV6,Q92831,Q92922,Q96EB6,Q9BQA5,Q9BWC9,Q9BX70,Q9C0J8,Q9H2X6,Q9H4B4,Q9H9B1,Q9NS56,Q9UER7,Q9UKY1,Q9UN74,Q9Y2A0,Q9Y675	O14641,O43261,O43524,O75925,O75928,P04637,P08047,P09874,P0CG48,P11274,P13497,P16885,P17028,P19338,P29590,P38398,P42858,P48643,P51587,P53350,P54132,P78527,Q05086,Q12873,Q12888,Q13315,Q13535,Q13746,Q14191,Q14695,Q14999,Q15648,Q16363,Q16665,Q16666,Q8IWT3,Q8NA92,Q8TBK6,Q8WWV6,Q92831,Q92922,Q96EB6,Q9BQA5,Q9BWC9,Q9BX70,Q9C0J8,Q9H2X6,Q9H4B4,Q9H9B1,Q9NS56,Q9UER7,Q9UKY1,Q9UN74,Q9Y2A0,Q9Y675	1	bowel	breast	0
TP53	P04637	G105	Y107	O14641,O43261,O43524,O75925,O75928,P04637,P08047,P09874,P0CG48,P11274,P13497,P16885,P17028,P19338,P29590,P38398,P42858,P48643,P51587,P53350,P54132,P78527,Q05086,Q12873,Q12888,Q13315,Q13535,Q13746,Q14191,Q14695,Q14999,Q15648,Q16363,Q16665,Q16666,Q8IWT3,Q8NA92,Q8TBK6,Q8WWV6,Q92831,Q92922,Q96EB6,Q9BQA5,Q9BWC9,Q9BX70,Q9C0J8,Q9H2X6,Q9H4B4,Q9H9B1,Q9NS56,Q9UER7,Q9UKY1,Q9UN74,Q9Y2A0,Q9Y675	O14641,O43261,O43524,O75925,O75928,P04637,P08047,P09874,P0CG48,P11274,P13497,P16885,P17028,P19338,P29590,P38398,P42858,P48643,P51587,P53350,P54132,P78527,Q05086,Q12873,Q12888,Q13315,Q13535,Q13746,Q14191,Q14695,Q14999,Q15648,Q16363,Q16665,Q16666,Q8IWT3,Q8NA92,Q8TBK6,Q8WWV6,Q92831,Q92922,Q96EB6,Q9BQA5,Q9BWC9,Q9BX70,Q9C0J8,Q9H2X6,Q9H4B4,Q9H9B1,Q9NS56,Q9UER7,Q9UKY1,Q9UN74,Q9Y2A0,Q9Y675	1	lung	breast	0
FGFR3	P22607	S249	Y373	P05230	P22607	0	headandneck,bladder,lung	bladder	1
FGFR3	P22607	S249	G370	P05230	P22607	0	headandneck,bladder,lung	bladder	1
FGFR3	P22607	S249	K650	P05230	O75380,O95873,P02008,P05060,P05787,P08238,P12236,P14866,P18847,P43235,P62917,Q12789,Q14181,Q15486,Q16543,Q6PGQ7,Q75LH2,Q7L4M3,Q86XS8,Q92540,Q96JH8,Q96LX7,Q96P48,Q9P2H0,Q9UMP7,Q9Y4H4	0	headandneck,bladder,lung	bladder	1
FGFR3	P22607	S249	G380	P05230	P22607	0	headandneck,bladder,lung	headandneck,bladder	2
FGFR3	P22607	Y373	R248	P22607	O75380,O95873,P02008,P05060,P05230,P05787,P08238,P12236,P14866,P18847,P43235,P62917,Q12789,Q14181,Q15486,Q16543,Q6PGQ7,Q75LH2,Q7L4M3,Q86XS8,Q92540,Q96JH8,Q96LX7,Q96P48,Q9P2H0,Q9UMP7,Q9Y4H4	0	bladder	bladder	1
FGFR3	P22607	Y373	G370	P22607	P22607	1	bladder	bladder	1
FGFR3	P22607	Y373	K650	P22607	O75380,O95873,P02008,P05060,P05787,P08238,P12236,P14866,P18847,P43235,P62917,Q12789,Q14181,Q15486,Q16543,Q6PGQ7,Q75LH2,Q7L4M3,Q86XS8,Q92540,Q96JH8,Q96LX7,Q96P48,Q9P2H0,Q9UMP7,Q9Y4H4	0	bladder	bladder	1
FGFR3	P22607	Y373	G380	P22607	P22607	1	bladder	headandneck,bladder	1
FGFR3	P22607	R248	G370	O75380,O95873,P02008,P05060,P05230,P05787,P08238,P12236,P14866,P18847,P43235,P62917,Q12789,Q14181,Q15486,Q16543,Q6PGQ7,Q75LH2,Q7L4M3,Q86XS8,Q92540,Q96JH8,Q96LX7,Q96P48,Q9P2H0,Q9UMP7,Q9Y4H4	P22607	0	bladder	bladder	1
FGFR3	P22607	R248	G380	O75380,O95873,P02008,P05060,P05230,P05787,P08238,P12236,P14866,P18847,P43235,P62917,Q12789,Q14181,Q15486,Q16543,Q6PGQ7,Q75LH2,Q7L4M3,Q86XS8,Q92540,Q96JH8,Q96LX7,Q96P48,Q9P2H0,Q9UMP7,Q9Y4H4	P22607	0	bladder	headandneck,bladder	1
FGFR3	P22607	G370	K650	P22607	O75380,O95873,P02008,P05060,P05787,P08238,P12236,P14866,P18847,P43235,P62917,Q12789,Q14181,Q15486,Q16543,Q6PGQ7,Q75LH2,Q7L4M3,Q86XS8,Q92540,Q96JH8,Q96LX7,Q96P48,Q9P2H0,Q9UMP7,Q9Y4H4	0	bladder	bladder	1
FGFR3	P22607	G370	G380	P22607	P22607	1	bladder	headandneck,bladder	1
FGFR3	P22607	K650	G380	O75380,O95873,P02008,P05060,P05787,P08238,P12236,P14866,P18847,P43235,P62917,Q12789,Q14181,Q15486,Q16543,Q6PGQ7,Q75LH2,Q7L4M3,Q86XS8,Q92540,Q96JH8,Q96LX7,Q96P48,Q9P2H0,Q9UMP7,Q9Y4H4	P22607	0	bladder	headandneck,bladder	1
PTEN	P60484	R233	D92	P05060,P0CG48,P46934,P60484,Q12959,Q93009,Q9BVJ6	O14745,P03950,P09341,P68400,P69905,Q13007,Q7L5N1,Q92995,Q9HBH7,Q9UJX0,W0UV28	0	bowel,uterus	uterus	1
PTEN	P60484	R233	A126	P05060,P0CG48,P46934,P60484,Q12959,Q93009,Q9BVJ6	O14745,P09341,P68400,Q7L5N1,Q9UJX0	0	bowel,uterus	breast	0
HRAS	P01112	G13	G12	O00329,P01112,P20936,P42336,P48736,P55196,Q07889,Q07890,Q13671,Q4ZG55,Q59GK3,Q8IZY5	O00329,P01112,P20936,P42336,P48736,P55196,Q07889,Q07890,Q13671,Q4ZG55,Q59GK3,Q8IZY5	1	adrenalgland,headandneck,lung,thymus,skin,bladder	skin,headandneck,bladder	3
FBXW7	Q969H0	R479	R367	Q13007,Q8WVJ2,Q9BY76	A6NE52,P01106,P05412,P46531,P63208,Q14258,Q149N8,Q15041,Q6ZRQ5,Q6ZTI6,Q96QR1,Q9H6U6	0	headandneck,lung,cervix,esophagusstomach,bladder,uterus,bowel	bowel	1
FBXW7	Q969H0	R689	R367	P08238,P24864,Q13007,Q13616,Q8NBJ7,Q969H0,Q96FE5,Q9BY76,Q9HBH7	A6NE52,P01106,P05412,P46531,P63208,Q14258,Q149N8,Q15041,Q6ZRQ5,Q6ZTI6,Q96QR1,Q9H6U6	0	bowel,uterus	bowel	1
FBXW7	Q969H0	R367	S582	A6NE52,P01106,P05412,P46531,P63208,Q14258,Q149N8,Q15041,Q6ZRQ5,Q6ZTI6,Q96QR1,Q9H6U6	P08238,P24864,Q13007,Q13616,Q8NBJ7,Q8WVJ2,Q969H0,Q96FE5,Q9HBH7	0	bowel	bowel	1
ERBB2	P04626	S310	L755	A8K1F4,B4DYC6,O00213,O00459,O14514,O14654,O14796,O15524,O43639,O75553,O75791,O75815,O94812,O94923,O95274,O95704,P04626,P05093,P07602,P07900,P08133,P08238,P08575,P11245,P14923,P15311,P15498,P16885,P19174,P20936,P22681,P23470,P23471,P26045,P27986,P29353,P31948,P35222,P35568,P40763,P41252,P42224,P46108,P46109,P49005,P51797,P52735,P53041,P58340,P62993,P78314,P98077,Q00341,Q13200,Q13239,Q13387,Q13451,…	Q08881	0	lung,cervix,esophagusstomach,skin,bladder,bowel,breast,biliarytract	lung,esophagusstomach,bladder,uterus,bowel,breast	5
ERBB2	P04626	S310	D769	A8K1F4,B4DYC6,O00213,O00459,O14514,O14654,O14796,O15524,O43639,O75553,O75791,O75815,O94812,O94923,O95274,O95704,P04626,P05093,P07602,P07900,P08133,P08238,P08575,P11245,P14923,P15311,P15498,P16885,P19174,P20936,P22681,P23470,P23471,P26045,P27986,P29353,P31948,P35222,P35568,P40763,P41252,P42224,P46108,P46109,P49005,P51797,P52735,P53041,P58340,P62993,P78314,P98077,Q00341,Q13200,Q13239,Q13387,Q13451,…	A8K1F4,B4DYC6,O00213,O00459,O14514,O14654,O14796,O15524,O43639,O75553,O75791,O75815,O94812,O94923,O95274,O95704,P04626,P05093,P07602,P07900,P08133,P08238,P08575,P11245,P14923,P15311,P15498,P16885,P19174,P20936,P22681,P23470,P23471,P26045,P27986,P29353,P31948,P35222,P35568,P40763,P41252,P42224,P46108,P46109,P49005,P51797,P52735,P53041,P58340,P62993,P78314,P98077,Q00341,Q13200,Q13239,Q13387,Q13451,…	1	lung,cervix,esophagusstomach,skin,bladder,bowel,breast,biliarytract	esophagusstomach,breast	2
ERBB2	P04626	S310	L869	A8K1F4,B4DYC6,O00213,O00459,O14514,O14654,O14796,O15524,O43639,O75553,O75791,O75815,O94812,O94923,O95274,O95704,P04626,P05093,P07602,P07900,P08133,P08238,P08575,P11245,P14923,P15311,P15498,P16885,P19174,P20936,P22681,P23470,P23471,P26045,P27986,P29353,P31948,P35222,P35568,P40763,P41252,P42224,P46108,P46109,P49005,P51797,P52735,P53041,P58340,P62993,P78314,P98077,Q00341,Q13200,Q13239,Q13387,Q13451,…	P42680,P42681,P51813,Q08881	0	lung,cervix,esophagusstomach,skin,bladder,bowel,breast,biliarytract	breast	1
ERBB2	P04626	S310	G776	A8K1F4,B4DYC6,O00213,O00459,O14514,O14654,O14796,O15524,O43639,O75553,O75791,O75815,O94812,O94923,O95274,O95704,P04626,P05093,P07602,P07900,P08133,P08238,P08575,P11245,P14923,P15311,P15498,P16885,P19174,P20936,P22681,P23470,P23471,P26045,P27986,P29353,P31948,P35222,P35568,P40763,P41252,P42224,P46108,P46109,P49005,P51797,P52735,P53041,P58340,P62993,P78314,P98077,Q00341,Q13200,Q13239,Q13387,Q13451,…	Q9UQQ2	0	lung,cervix,esophagusstomach,skin,bladder,bowel,breast,biliarytract	esophagusstomach	1
ERBB2	P04626	L755	R678	Q08881	P04626	0	lung,esophagusstomach,bladder,uterus,bowel,breast	esophagusstomach,bowel,bladder,uterus	4
ERBB2	P04626	L755	V777	Q08881	A8K1F4,B4DYC6,O00213,O00459,O14514,O14654,O14796,O15524,O43639,O75553,O75791,O75815,O94812,O94923,O95274,O95704,P05093,P07602,P07900,P08133,P08238,P08575,P11245,P14923,P15311,P15498,P16885,P19174,P20936,P22681,P23470,P23471,P26045,P27986,P29353,P31948,P35222,P35568,P40763,P41252,P42224,P46108,P46109,P49005,P51797,P52735,P53041,P58340,P62993,P78314,P98077,Q00341,Q13200,Q13239,Q13387,Q13451,Q13671,…	0	lung,esophagusstomach,bladder,uterus,bowel,breast	breast,esophagusstomach,bowel	3
ERBB2	P04626	L755	D769	Q08881	A8K1F4,B4DYC6,O00213,O00459,O14514,O14654,O14796,O15524,O43639,O75553,O75791,O75815,O94812,O94923,O95274,O95704,P04626,P05093,P07602,P07900,P08133,P08238,P08575,P11245,P14923,P15311,P15498,P16885,P19174,P20936,P22681,P23470,P23471,P26045,P27986,P29353,P31948,P35222,P35568,P40763,P41252,P42224,P46108,P46109,P49005,P51797,P52735,P53041,P58340,P62993,P78314,P98077,Q00341,Q13200,Q13239,Q13387,Q13451,…	0	lung,esophagusstomach,bladder,uterus,bowel,breast	esophagusstomach,breast	2
ERBB2	P04626	L755	G776	Q08881	Q9UQQ2	0	lung,esophagusstomach,bladder,uterus,bowel,breast	esophagusstomach	1
ERBB2	P04626	L755	V659	Q08881	P00533,P04626	0	lung,esophagusstomach,bladder,uterus,bowel,breast	lung	1
ERBB2	P04626	L755	G660	Q08881	P00533,P04626	0	lung,esophagusstomach,bladder,uterus,bowel,breast	bladder	1
ERBB2	P04626	L755	D277	Q08881	A8K1F4,B4DYC6,O00213,O00459,O14514,O14654,O14796,O15524,O43639,O75553,O75791,O75815,O94812,O94923,O95274,O95704,P04626,P05093,P07602,P07900,P08133,P08238,P08575,P11245,P14923,P15311,P15498,P16885,P19174,P20936,P21860,P22681,P23470,P23471,P26045,P27986,P29353,P31948,P35222,P35568,P40763,P41252,P42224,P46108,P46109,P49005,P51797,P52735,P53041,P58340,P62993,P78314,P98077,Q00341,Q13200,Q13239,Q13387,…	0	lung,esophagusstomach,bladder,uterus,bowel,breast	bladder	1
ERBB2	P04626	R678	V777	P04626	A8K1F4,B4DYC6,O00213,O00459,O14514,O14654,O14796,O15524,O43639,O75553,O75791,O75815,O94812,O94923,O95274,O95704,P05093,P07602,P07900,P08133,P08238,P08575,P11245,P14923,P15311,P15498,P16885,P19174,P20936,P22681,P23470,P23471,P26045,P27986,P29353,P31948,P35222,P35568,P40763,P41252,P42224,P46108,P46109,P49005,P51797,P52735,P53041,P58340,P62993,P78314,P98077,Q00341,Q13200,Q13239,Q13387,Q13451,Q13671,…	0	esophagusstomach,bowel,bladder,uterus	breast,esophagusstomach,bowel	2
ERBB2	P04626	R678	L869	P04626	P42680,P42681,P51813,Q08881	0	esophagusstomach,bowel,bladder,uterus	breast	0
ERBB2	P04626	R678	G776	P04626	Q9UQQ2	0	esophagusstomach,bowel,bladder,uterus	esophagusstomach	1
ERBB2	P04626	V777	L869	A8K1F4,B4DYC6,O00213,O00459,O14514,O14654,O14796,O15524,O43639,O75553,O75791,O75815,O94812,O94923,O95274,O95704,P05093,P07602,P07900,P08133,P08238,P08575,P11245,P14923,P15311,P15498,P16885,P19174,P20936,P22681,P23470,P23471,P26045,P27986,P29353,P31948,P35222,P35568,P40763,P41252,P42224,P46108,P46109,P49005,P51797,P52735,P53041,P58340,P62993,P78314,P98077,Q00341,Q13200,Q13239,Q13387,Q13451,Q13671,…	P42680,P42681,P51813,Q08881	0	breast,esophagusstomach,bowel	breast	1
ERBB2	P04626	V777	G776	A8K1F4,B4DYC6,O00213,O00459,O14514,O14654,O14796,O15524,O43639,O75553,O75791,O75815,O94812,O94923,O95274,O95704,P05093,P07602,P07900,P08133,P08238,P08575,P11245,P14923,P15311,P15498,P16885,P19174,P20936,P22681,P23470,P23471,P26045,P27986,P29353,P31948,P35222,P35568,P40763,P41252,P42224,P46108,P46109,P49005,P51797,P52735,P53041,P58340,P62993,P78314,P98077,Q00341,Q13200,Q13239,Q13387,Q13451,Q13671,…	Q9UQQ2	0	breast,esophagusstomach,bowel	esophagusstomach	1
ERBB2	P04626	V777	V659	A8K1F4,B4DYC6,O00213,O00459,O14514,O14654,O14796,O15524,O43639,O75553,O75791,O75815,O94812,O94923,O95274,O95704,P05093,P07602,P07900,P08133,P08238,P08575,P11245,P14923,P15311,P15498,P16885,P19174,P20936,P22681,P23470,P23471,P26045,P27986,P29353,P31948,P35222,P35568,P40763,P41252,P42224,P46108,P46109,P49005,P51797,P52735,P53041,P58340,P62993,P78314,P98077,Q00341,Q13200,Q13239,Q13387,Q13451,Q13671,…	P00533,P04626	0	breast,esophagusstomach,bowel	lung	0
ERBB2	P04626	V777	G660	A8K1F4,B4DYC6,O00213,O00459,O14514,O14654,O14796,O15524,O43639,O75553,O75791,O75815,O94812,O94923,O95274,O95704,P05093,P07602,P07900,P08133,P08238,P08575,P11245,P14923,P15311,P15498,P16885,P19174,P20936,P22681,P23470,P23471,P26045,P27986,P29353,P31948,P35222,P35568,P40763,P41252,P42224,P46108,P46109,P49005,P51797,P52735,P53041,P58340,P62993,P78314,P98077,Q00341,Q13200,Q13239,Q13387,Q13451,Q13671,…	P00533,P04626	0	breast,esophagusstomach,bowel	bladder	0
ERBB2	P04626	D769	L869	A8K1F4,B4DYC6,O00213,O00459,O14514,O14654,O14796,O15524,O43639,O75553,O75791,O75815,O94812,O94923,O95274,O95704,P04626,P05093,P07602,P07900,P08133,P08238,P08575,P11245,P14923,P15311,P15498,P16885,P19174,P20936,P22681,P23470,P23471,P26045,P27986,P29353,P31948,P35222,P35568,P40763,P41252,P42224,P46108,P46109,P49005,P51797,P52735,P53041,P58340,P62993,P78314,P98077,Q00341,Q13200,Q13239,Q13387,Q13451,…	P42680,P42681,P51813,Q08881	0	esophagusstomach,breast	breast	1
ERBB2	P04626	D769	G776	A8K1F4,B4DYC6,O00213,O00459,O14514,O14654,O14796,O15524,O43639,O75553,O75791,O75815,O94812,O94923,O95274,O95704,P04626,P05093,P07602,P07900,P08133,P08238,P08575,P11245,P14923,P15311,P15498,P16885,P19174,P20936,P22681,P23470,P23471,P26045,P27986,P29353,P31948,P35222,P35568,P40763,P41252,P42224,P46108,P46109,P49005,P51797,P52735,P53041,P58340,P62993,P78314,P98077,Q00341,Q13200,Q13239,Q13387,Q13451,…	Q9UQQ2	0	esophagusstomach,breast	esophagusstomach	1
ERBB2	P04626	L869	G776	P42680,P42681,P51813,Q08881	Q9UQQ2	0	breast	esophagusstomach	0
ERBB2	P04626	L869	V659	P42680,P42681,P51813,Q08881	P00533,P04626	0	breast	lung	0
ERBB2	P04626	L869	G660	P42680,P42681,P51813,Q08881	P00533,P04626	0	breast	bladder	0
ERBB2	P04626	L869	D277	P42680,P42681,P51813,Q08881	A8K1F4,B4DYC6,O00213,O00459,O14514,O14654,O14796,O15524,O43639,O75553,O75791,O75815,O94812,O94923,O95274,O95704,P04626,P05093,P07602,P07900,P08133,P08238,P08575,P11245,P14923,P15311,P15498,P16885,P19174,P20936,P21860,P22681,P23470,P23471,P26045,P27986,P29353,P31948,P35222,P35568,P40763,P41252,P42224,P46108,P46109,P49005,P51797,P52735,P53041,P58340,P62993,P78314,P98077,Q00341,Q13200,Q13239,Q13387,…	0	breast	bladder	0
ERBB2	P04626	G776	V659	Q9UQQ2	P00533,P04626	0	esophagusstomach	lung	0
ERBB2	P04626	G776	G660	Q9UQQ2	P00533,P04626	0	esophagusstomach	bladder	0
ERBB2	P04626	G776	D277	Q9UQQ2	A8K1F4,B4DYC6,O00213,O00459,O14514,O14654,O14796,O15524,O43639,O75553,O75791,O75815,O94812,O94923,O95274,O95704,P04626,P05093,P07602,P07900,P08133,P08238,P08575,P11245,P14923,P15311,P15498,P16885,P19174,P20936,P21860,P22681,P23470,P23471,P26045,P27986,P29353,P31948,P35222,P35568,P40763,P41252,P42224,P46108,P46109,P49005,P51797,P52735,P53041,P58340,P62993,P78314,P98077,Q00341,Q13200,Q13239,Q13387,…	0	esophagusstomach	bladder	0
ERBB2	P04626	V659	G660	P00533,P04626	P00533,P04626	1	lung	bladder	0
GNAQ	P50148	Q209	R183	Q9NQ66	Q9NQ66	1	eye,skin	eye	1
CTNNB1	P35222	S37	S33	P30512	P30512	1	prostate,lung,esophagusstomach,bladder,cnsbrain,uterus,liver	prostate,lung,esophagusstomach,bladder,cnsbrain,uterus,ovaryfallopiantube,liver	7
CTNNB1	P35222	S37	K335	P30512	F1D8N5,O14907,O15111,P12830,P19022,P24385,P25054,P26232,P31749,P49768,P49840,P49841,P51955,P63146,P63208,Q9NQB0,Q9UII7,Q9UJU2,Q9Y230	0	prostate,lung,esophagusstomach,bladder,cnsbrain,uterus,liver	liver	1
CTNNB1	P35222	S37	N387	P30512	F1D8N5,O00482,O00512,O15111,O15169,O60907,O95405,P04626,P05412,P08575,P10275,P10586,P12830,P15884,P19022,P19838,P23467,P23470,P24385,P25054,P26232,P31749,P33151,P49768,P49840,P49841,P51532,P51955,P63208,Q05209,Q09472,Q12913,Q15078,Q16827,Q92793,Q96RT1,Q9NQB0,Q9NSA3,Q9UI14,Q9UII7,Q9UJU2,Q9Y2T1	0	prostate,lung,esophagusstomach,bladder,cnsbrain,uterus,liver	liver	1
CTNNB1	P35222	S37	W383	P30512	F1D8N5,O00482,O15111,P12830,P19022,P24385,P25054,P26232,P31749,P49768,P49840,P49841,P51955,P63208,Q9UII7,Q9UJU2	0	prostate,lung,esophagusstomach,bladder,cnsbrain,uterus,liver	bowel	0
CTNNB1	P35222	D32	G34	P30512,Q9Y297	P30512,Q9Y297	1	prostate,lung,cervix,esophagusstomach,skin,cnsbrain,uterus,liver	adrenalgland,lung,cnsbrain,uterus,liver	4
CTNNB1	P35222	D32	K335	P30512,Q9Y297	F1D8N5,O14907,O15111,P12830,P19022,P24385,P25054,P26232,P31749,P49768,P49840,P49841,P51955,P63146,P63208,Q9NQB0,Q9UII7,Q9UJU2,Q9Y230	0	prostate,lung,cervix,esophagusstomach,skin,cnsbrain,uterus,liver	liver	1
CTNNB1	P35222	D32	N387	P30512,Q9Y297	F1D8N5,O00482,O00512,O15111,O15169,O60907,O95405,P04626,P05412,P08575,P10275,P10586,P12830,P15884,P19022,P19838,P23467,P23470,P24385,P25054,P26232,P31749,P33151,P49768,P49840,P49841,P51532,P51955,P63208,Q05209,Q09472,Q12913,Q15078,Q16827,Q92793,Q96RT1,Q9NQB0,Q9NSA3,Q9UI14,Q9UII7,Q9UJU2,Q9Y2T1	0	prostate,lung,cervix,esophagusstomach,skin,cnsbrain,uterus,liver	liver	1
CTNNB1	P35222	D32	H36	P30512,Q9Y297	P30512,Q9Y297	1	prostate,lung,cervix,esophagusstomach,skin,cnsbrain,uterus,liver	liver	1
CTNNB1	P35222	D32	I35	P30512,Q9Y297	P30512,Q9Y297	1	prostate,lung,cervix,esophagusstomach,skin,cnsbrain,uterus,liver	liver,uterus	2
CTNNB1	P35222	D32	W383	P30512,Q9Y297	F1D8N5,O00482,O15111,P12830,P19022,P24385,P25054,P26232,P31749,P49768,P49840,P49841,P51955,P63208,Q9UII7,Q9UJU2	0	prostate,lung,cervix,esophagusstomach,skin,cnsbrain,uterus,liver	bowel	0
CTNNB1	P35222	S33	K335	P30512	F1D8N5,O14907,O15111,P12830,P19022,P24385,P25054,P26232,P31749,P49768,P49840,P49841,P51955,P63146,P63208,Q9NQB0,Q9UII7,Q9UJU2,Q9Y230	0	prostate,lung,esophagusstomach,bladder,cnsbrain,uterus,ovaryfallopiantube,liver	liver	1
CTNNB1	P35222	S33	N387	P30512	F1D8N5,O00482,O00512,O15111,O15169,O60907,O95405,P04626,P05412,P08575,P10275,P10586,P12830,P15884,P19022,P19838,P23467,P23470,P24385,P25054,P26232,P31749,P33151,P49768,P49840,P49841,P51532,P51955,P63208,Q05209,Q09472,Q12913,Q15078,Q16827,Q92793,Q96RT1,Q9NQB0,Q9NSA3,Q9UI14,Q9UII7,Q9UJU2,Q9Y2T1	0	prostate,lung,esophagusstomach,bladder,cnsbrain,uterus,ovaryfallopiantube,liver	liver	1
CTNNB1	P35222	S33	W383	P30512	F1D8N5,O00482,O15111,P12830,P19022,P24385,P25054,P26232,P31749,P49768,P49840,P49841,P51955,P63208,Q9UII7,Q9UJU2	0	prostate,lung,esophagusstomach,bladder,cnsbrain,uterus,ovaryfallopiantube,liver	bowel	0
CTNNB1	P35222	G34	K335	P30512,Q9Y297	F1D8N5,O14907,O15111,P12830,P19022,P24385,P25054,P26232,P31749,P49768,P49840,P49841,P51955,P63146,P63208,Q9NQB0,Q9UII7,Q9UJU2,Q9Y230	0	adrenalgland,lung,cnsbrain,uterus,liver	liver	1
CTNNB1	P35222	G34	N387	P30512,Q9Y297	F1D8N5,O00482,O00512,O15111,O15169,O60907,O95405,P04626,P05412,P08575,P10275,P10586,P12830,P15884,P19022,P19838,P23467,P23470,P24385,P25054,P26232,P31749,P33151,P49768,P49840,P49841,P51532,P51955,P63208,Q05209,Q09472,Q12913,Q15078,Q16827,Q92793,Q96RT1,Q9NQB0,Q9NSA3,Q9UI14,Q9UII7,Q9UJU2,Q9Y2T1	0	adrenalgland,lung,cnsbrain,uterus,liver	liver	1
CTNNB1	P35222	G34	H36	P30512,Q9Y297	P30512,Q9Y297	1	adrenalgland,lung,cnsbrain,uterus,liver	liver	1
CTNNB1	P35222	G34	I35	P30512,Q9Y297	P30512,Q9Y297	1	adrenalgland,lung,cnsbrain,uterus,liver	liver,uterus	2
CTNNB1	P35222	G34	W383	P30512,Q9Y297	F1D8N5,O00482,O15111,P12830,P19022,P24385,P25054,P26232,P31749,P49768,P49840,P49841,P51955,P63208,Q9UII7,Q9UJU2	0	adrenalgland,lung,cnsbrain,uterus,liver	bowel	0
CTNNB1	P35222	K335	H36	F1D8N5,O14907,O15111,P12830,P19022,P24385,P25054,P26232,P31749,P49768,P49840,P49841,P51955,P63146,P63208,Q9NQB0,Q9UII7,Q9UJU2,Q9Y230	P30512,Q9Y297	0	liver	liver	1
CTNNB1	P35222	K335	I35	F1D8N5,O14907,O15111,P12830,P19022,P24385,P25054,P26232,P31749,P49768,P49840,P49841,P51955,P63146,P63208,Q9NQB0,Q9UII7,Q9UJU2,Q9Y230	P30512,Q9Y297	0	liver	liver,uterus	1
CTNNB1	P35222	N387	H36	F1D8N5,O00482,O00512,O15111,O15169,O60907,O95405,P04626,P05412,P08575,P10275,P10586,P12830,P15884,P19022,P19838,P23467,P23470,P24385,P25054,P26232,P31749,P33151,P49768,P49840,P49841,P51532,P51955,P63208,Q05209,Q09472,Q12913,Q15078,Q16827,Q92793,Q96RT1,Q9NQB0,Q9NSA3,Q9UI14,Q9UII7,Q9UJU2,Q9Y2T1	P30512,Q9Y297	0	liver	liver	1
CTNNB1	P35222	N387	I35	F1D8N5,O00482,O00512,O15111,O15169,O60907,O95405,P04626,P05412,P08575,P10275,P10586,P12830,P15884,P19022,P19838,P23467,P23470,P24385,P25054,P26232,P31749,P33151,P49768,P49840,P49841,P51532,P51955,P63208,Q05209,Q09472,Q12913,Q15078,Q16827,Q92793,Q96RT1,Q9NQB0,Q9NSA3,Q9UI14,Q9UII7,Q9UJU2,Q9Y2T1	P30512,Q9Y297	0	liver	liver,uterus	1
CTNNB1	P35222	H36	I35	P30512,Q9Y297	P30512,Q9Y297	1	liver	liver,uterus	1
CTNNB1	P35222	H36	W383	P30512,Q9Y297	F1D8N5,O00482,O15111,P12830,P19022,P24385,P25054,P26232,P31749,P49768,P49840,P49841,P51955,P63208,Q9UII7,Q9UJU2	0	liver	bowel	0
CTNNB1	P35222	I35	W383	P30512,Q9Y297	F1D8N5,O00482,O15111,P12830,P19022,P24385,P25054,P26232,P31749,P49768,P49840,P49841,P51955,P63208,Q9UII7,Q9UJU2	0	liver,uterus	bowel	0
CDKN2A	P42771	R80	D84	P42771	P02751,P0CG48,P49736,Q00534,Q00839,Q7L590,Q8NHU6,Q99459,Q9BZ95,Q9NXV6	0	headandneck,lung,esophagusstomach,skin,bladder,bowel,pancreas	esophagusstomach,lung	2
CDKN2A	P42771	R80	E88	P42771	A4D0P7,O00311,O15234,O43913,O43929,O75398,O75419,O75496,P02751,P04637,P0CG48,P11245,P17252,P24385,P33992,P40337,P49736,Q00534,Q00839,Q00987,Q01094,Q6UXH1,Q7L590,Q8NHU6,Q96BA7,Q96CS2,Q99459,Q99741,Q9BY76,Q9BZ95,Q9NXV6,Q9UHV2,Q9UQS6	0	headandneck,lung,esophagusstomach,skin,bladder,bowel,pancreas	skin,headandneck	2
ERBB3	P21860	E928	E332	O00459,O43374,O43639,O60880,O75553,O75815,P00533,P08238,P12931,P15498,P16333,P19174,P20936,P21860,P27986,P29353,P42684,P43405,P46108,P46109,P52735,P52757,Q13671,Q14451,Q4VC44,Q63HR2,Q68CZ2,Q8IZW8,Q92529,Q92569,Q9UKW4,Q9ULJ1,Q9UN19,Q9UQ80,Q9UQQ2	P04626	0	breast	bladder	0
ERBB3	P21860	E928	M91	O00459,O43374,O43639,O60880,O75553,O75815,P00533,P08238,P12931,P15498,P16333,P19174,P20936,P21860,P27986,P29353,P42684,P43405,P46108,P46109,P52735,P52757,Q13671,Q14451,Q4VC44,Q63HR2,Q68CZ2,Q8IZW8,Q92529,Q92569,Q9UKW4,Q9ULJ1,Q9UN19,Q9UQ80,Q9UQQ2	Q02297	0	breast	bladder	0
ERBB3	P21860	S846	E332	P00533	P04626	0	esophagusstomach,bowel	bladder	0
ERBB3	P21860	S846	M91	P00533	Q02297	0	esophagusstomach,bowel	bladder	0
ERBB3	P21860	S846	R103	P00533	O00459,O43374,O43639,O60880,O75553,O75815,P08238,P12931,P15498,P16333,P19174,P20936,P21860,P27986,P29353,P46108,P46109,P52735,P52757,Q13671,Q14451,Q4VC44,Q63HR2,Q68CZ2,Q8IZW8,Q92529,Q92569,Q9UKW4,Q9ULJ1,Q9UN19,Q9UQ80,Q9UQQ2	0	esophagusstomach,bowel	bladder	0
ERBB3	P21860	E332	M91	P04626	Q02297	0	bladder	bladder	1
ERBB3	P21860	E332	R103	P04626	O00459,O43374,O43639,O60880,O75553,O75815,P08238,P12931,P15498,P16333,P19174,P20936,P21860,P27986,P29353,P46108,P46109,P52735,P52757,Q13671,Q14451,Q4VC44,Q63HR2,Q68CZ2,Q8IZW8,Q92529,Q92569,Q9UKW4,Q9ULJ1,Q9UN19,Q9UQ80,Q9UQQ2	0	bladder	bladder	1
ERBB3	P21860	M91	R103	Q02297	O00459,O43374,O43639,O60880,O75553,O75815,P08238,P12931,P15498,P16333,P19174,P20936,P21860,P27986,P29353,P46108,P46109,P52735,P52757,Q13671,Q14451,Q4VC44,Q63HR2,Q68CZ2,Q8IZW8,Q92529,Q92569,Q9UKW4,Q9ULJ1,Q9UN19,Q9UQ80,Q9UQQ2	0	bladder	bladder	1
NFE2L2	Q16236	E82	G81	Q14145	Q14145	1	liver,uterus	esophagusstomach,lung,kidney	0
NFE2L2	Q16236	E82	T80	Q14145	Q14145	1	liver,uterus	lung,uterus	1
NFE2L2	Q16236	G81	T80	Q14145	Q14145	1	esophagusstomach,lung,kidney	lung,uterus	1
KIT	P10721	D816	L576	Q9UQQ2	P00519,P06239,P07332,P07947,P09769,P10721,P12931,P42680,P42681,P42684	0	testis,blood	softtissue,skin	0
KIT	P10721	D816	D820	Q9UQQ2	Q9UQQ2	1	testis,blood	softtissue,testis	1
KIT	P10721	D816	Y823	Q9UQQ2	Q9UQQ2	1	testis,blood	softtissue,testis	1
KIT	P10721	L576	D820	P00519,P06239,P07332,P07947,P09769,P10721,P12931,P42680,P42681,P42684	Q9UQQ2	0	softtissue,skin	softtissue,testis	1
KIT	P10721	L576	Y823	P00519,P06239,P07332,P07947,P09769,P10721,P12931,P42680,P42681,P42684	Q9UQQ2	0	softtissue,skin	softtissue,testis	1
KIT	P10721	D820	Y823	Q9UQQ2	Q9UQQ2	1	softtissue,testis	softtissue,testis	2
RHOA	P61586	Y42	E47	O15085,Q12802,Q7Z628,Q9NZN5	O14578,Q16512	0	esophagusstomach	bladder	0
RHOA	P61586	Y42	G62	O15085,Q12802,Q7Z628,Q9NZN5	O15085,Q12802,Q7Z628,Q9NZN5	1	esophagusstomach	esophagusstomach	1
RHOA	P61586	E47	Y34	O14578,Q16512	E9KL35,O15085,P04844,P36897,P52565,P63244,Q07960,Q12802,Q13459,Q15654,Q6WCQ1,Q7Z628,Q86T64,Q86UP2,Q969H4,Q9BST9,Q9HAU4,Q9HCE7,Q9NQW6,Q9NZN5,Q9P2F6,Q9UKT9,Q9Y4D1,Q9Y4F9	0	bladder	esophagusstomach	0
RHOA	P61586	E47	E40	O14578,Q16512	E9KL35,O15085,O60610,P04844,P36897,P52565,P63244,Q12802,Q13459,Q13464,Q15654,Q6WCQ1,Q7Z628,Q86T64,Q86UP2,Q969H4,Q9BST9,Q9HAU4,Q9HCE7,Q9NQW6,Q9NZN5,Q9UKT9,Q9Y4D1,Q9Y4F9	0	bladder	headandneck	0
RHOA	P61586	E47	G62	O14578,Q16512	O15085,Q12802,Q7Z628,Q9NZN5	0	bladder	esophagusstomach	0
RHOA	P61586	E47	T37	O14578,Q16512	E9KL35,O15085,P04844,P36897,P52565,P63244,Q07960,Q12802,Q13459,Q15654,Q6WCQ1,Q7Z628,Q86T64,Q86UP2,Q969H4,Q9BST9,Q9HAU4,Q9HCE7,Q9NQW6,Q9NZN5,Q9UKT9,Q9Y4D1,Q9Y4F9	0	bladder	bowel	0
CDK4	P11802	R24	K22	P38936,P42772,P42773,P46527,P55273	P38936,P42772,P42773,P46527,P55273	1	skin,lung	skin	1
ERCC2	P18074	P463	D609	P08238,P53041	P51946,Q9HB71	0	bladder	bladder	1
HIST1H3B	P68431	K28	E106	O15164	O15047,P42858,P49321,P55201,Q09472,Q12888,Q13111,Q15047,Q8TEX9,Q92793,Q92830,Q92831,Q9BYW2,Q9NR48,Q9NVP2,Q9ULM3,Q9UPS6,Q9Y294,Q9Y5B9	0	cnsbrain	lung	0
PIK3R1	P27986	N564	K567	P42336,P42338	P42336,P42338	1	bowel,cnsbrain	bowel,uterus	1
PIK3R1	P27986	N564	D560	P42336,P42338	P42336,P42338	1	bowel,cnsbrain	cnsbrain	1
PIK3R1	P27986	K567	D560	P42336,P42338	P42336,P42338	1	bowel,uterus	cnsbrain	0
PTPN11	Q06124	A72	E69	P62993	P62993	1	blood,cnsbrain	cnsbrain	1
PTPN11	Q06124	A72	G507	P62993	P04626	0	blood,cnsbrain	esophagusstomach	0
PTPN11	Q06124	A72	T511	P62993	P04626	0	blood,cnsbrain	cnsbrain	1
PTPN11	Q06124	A72	D61	P62993	P62993	1	blood,cnsbrain	cnsbrain	1
PTPN11	Q06124	E69	G507	P62993	P04626	0	cnsbrain	esophagusstomach	0
PTPN11	Q06124	E69	T511	P62993	P04626	0	cnsbrain	cnsbrain	1
PTPN11	Q06124	E69	D61	P62993	P62993	1	cnsbrain	cnsbrain	1
PTPN11	Q06124	G507	T511	P04626	P04626	1	esophagusstomach	cnsbrain	0
PTPN11	Q06124	G507	D61	P04626	P62993	0	esophagusstomach	cnsbrain	0
PTPN11	Q06124	T511	D61	P04626	P62993	0	cnsbrain	cnsbrain	1
MET	P08581	F1200	Y1230	O14508,O14544,O14796,O15357,O15524,O43639,O60880,O75159,O75815,P06239,P08575,P08581,P16333,P16885,P23470,P26045,P27986,P29353,P46108,P52735,P62993,P78314,P98077,Q05209,Q12913,Q13480,Q15262,Q15464,Q16827,Q63HR2,Q68CZ2,Q6S5L8,Q8IZW8,Q8N5H7,Q92529,Q92569,Q96EY1,Q96IW2,Q96JZ2,Q9H6Q3,Q9HBL0,Q9NP31,Q9UKW4,Q9ULZ2	O14492,P42680,P42681,Q06187,Q9NRF2,Q9UQQ2	0	kidney	kidney	1
MET	P08581	F1200	H1094	O14508,O14544,O14796,O15357,O15524,O43639,O60880,O75159,O75815,P06239,P08575,P08581,P16333,P16885,P23470,P26045,P27986,P29353,P46108,P52735,P62993,P78314,P98077,Q05209,Q12913,Q13480,Q15262,Q15464,Q16827,Q63HR2,Q68CZ2,Q6S5L8,Q8IZW8,Q8N5H7,Q92529,Q92569,Q96EY1,Q96IW2,Q96JZ2,Q9H6Q3,Q9HBL0,Q9NP31,Q9UKW4,Q9ULZ2	Q08881	0	kidney	kidney	1
MET	P08581	Y1230	H1094	O14492,P42680,P42681,Q06187,Q9NRF2,Q9UQQ2	Q08881	0	kidney	kidney	1
FOXA1	P55317	I176	H247	Q04724,Q59EF7,Q6UXD5	Q04724,Q59EF7,Q6UXD5	1	breast	breast,prostate	1
FOXA1	P55317	I176	M253	Q04724,Q59EF7,Q6UXD5	Q04724,Q59EF7,Q6UXD5	1	breast	prostate	0
FOXA1	P55317	I176	R261	Q04724,Q59EF7,Q6UXD5	Q04724,Q59EF7,Q6UXD5	1	breast	prostate	0
FOXA1	P55317	I176	S250	Q04724,Q59EF7,Q6UXD5	Q04724,Q59EF7,Q6UXD5	1	breast	breast	1
FOXA1	P55317	I176	D226	Q04724,Q59EF7,Q6UXD5	Q04724,Q59EF7,Q6UXD5	1	breast	breast,prostate	1
FOXA1	P55317	I176	R219	Q04724,Q59EF7,Q6UXD5	Q04724,Q59EF7,Q6UXD5	1	breast	prostate	0
FOXA1	P55317	H247	M253	Q04724,Q59EF7,Q6UXD5	Q04724,Q59EF7,Q6UXD5	1	breast,prostate	prostate	1
FOXA1	P55317	H247	R261	Q04724,Q59EF7,Q6UXD5	Q04724,Q59EF7,Q6UXD5	1	breast,prostate	prostate	1
FOXA1	P55317	H247	S250	Q04724,Q59EF7,Q6UXD5	Q04724,Q59EF7,Q6UXD5	1	breast,prostate	breast	1
FOXA1	P55317	H247	D226	Q04724,Q59EF7,Q6UXD5	Q04724,Q59EF7,Q6UXD5	1	breast,prostate	breast,prostate	2
FOXA1	P55317	H247	R219	Q04724,Q59EF7,Q6UXD5	Q04724,Q59EF7,Q6UXD5	1	breast,prostate	prostate	1
FOXA1	P55317	M253	R261	Q04724,Q59EF7,Q6UXD5	Q04724,Q59EF7,Q6UXD5	1	prostate	prostate	1
FOXA1	P55317	M253	S250	Q04724,Q59EF7,Q6UXD5	Q04724,Q59EF7,Q6UXD5	1	prostate	breast	0
FOXA1	P55317	M253	D226	Q04724,Q59EF7,Q6UXD5	Q04724,Q59EF7,Q6UXD5	1	prostate	breast,prostate	1
FOXA1	P55317	M253	R219	Q04724,Q59EF7,Q6UXD5	Q04724,Q59EF7,Q6UXD5	1	prostate	prostate	1
FOXA1	P55317	R261	S250	Q04724,Q59EF7,Q6UXD5	Q04724,Q59EF7,Q6UXD5	1	prostate	breast	0
FOXA1	P55317	R261	D226	Q04724,Q59EF7,Q6UXD5	Q04724,Q59EF7,Q6UXD5	1	prostate	breast,prostate	1
FOXA1	P55317	R261	R219	Q04724,Q59EF7,Q6UXD5	Q04724,Q59EF7,Q6UXD5	1	prostate	prostate	1
FOXA1	P55317	S250	D226	Q04724,Q59EF7,Q6UXD5	Q04724,Q59EF7,Q6UXD5	1	breast	breast,prostate	1
FOXA1	P55317	S250	R219	Q04724,Q59EF7,Q6UXD5	Q04724,Q59EF7,Q6UXD5	1	breast	prostate	0
FOXA1	P55317	D226	R219	Q04724,Q59EF7,Q6UXD5	Q04724,Q59EF7,Q6UXD5	1	breast,prostate	prostate	1
VHL	P40337	R161	C162	P21333,P42771,P61758,Q15369,Q6IE81,Q8TEY7,Q96KM6,Q99750,Q99814	P21333,P42771,P61758,Q15369,Q6IE81,Q8TEY7,Q96KM6,Q99750,Q99814	1	kidney	kidney	1
STK11	Q15831	D194	S216	O96007,P46926,Q13131,Q13451,Q15906,Q5HYG5,Q8IV08,Q8N465,Q96DZ1,Q99816,Q9C0K7,Q9UNE7,Q9Y376,V9HWD3	Q15831	0	lung	lung	1
KEAP1	Q14145	R470	G480	O14920,O60336,O95980,P02724,P04040,P06454,P10909,P54274,P54619,P62495,Q04206,Q13501,Q14419,Q14440,Q53S24,Q6P1L5,Q8N573,Q8WUM4,Q92934,Q96IP4,Q9BRX9,Q9HB75,Q9NPC3,Q9NX65,Q9NY33,Q9NZJ9,Q9Y3Q8	Q14145,Q14494,Q8NF22	0	lung	lung	1
KEAP1	Q14145	G480	M110	Q14145,Q14494,Q8NF22	B4DYC6,O14920,O60336,O95980,P02724,P04040,P06454,P10909,P54274,P54619,P62310,P62495,P63162,Q04206,Q13257,Q13501,Q14419,Q14440,Q53S24,Q6P1L5,Q7Z3M2,Q86SX6,Q8N573,Q8WUM4,Q92934,Q96IP4,Q9BRX9,Q9H1Y0,Q9HB75,Q9NPC3,Q9NX65,Q9NY33,Q9NZJ9,Q9UIM3,Q9Y3Q8	0	lung	lung	1
