# Supplementary material for: A full-proteome, interaction-specific characterization of mutational hotspots across human cancers
Source: HighWire-hosted journal article supplement (doi:10.1101/gr.275437.121), 2021-12-28
Supplement: Supplementary_Fig_1.pdf [file Supplementary_Fig_1.pdf]

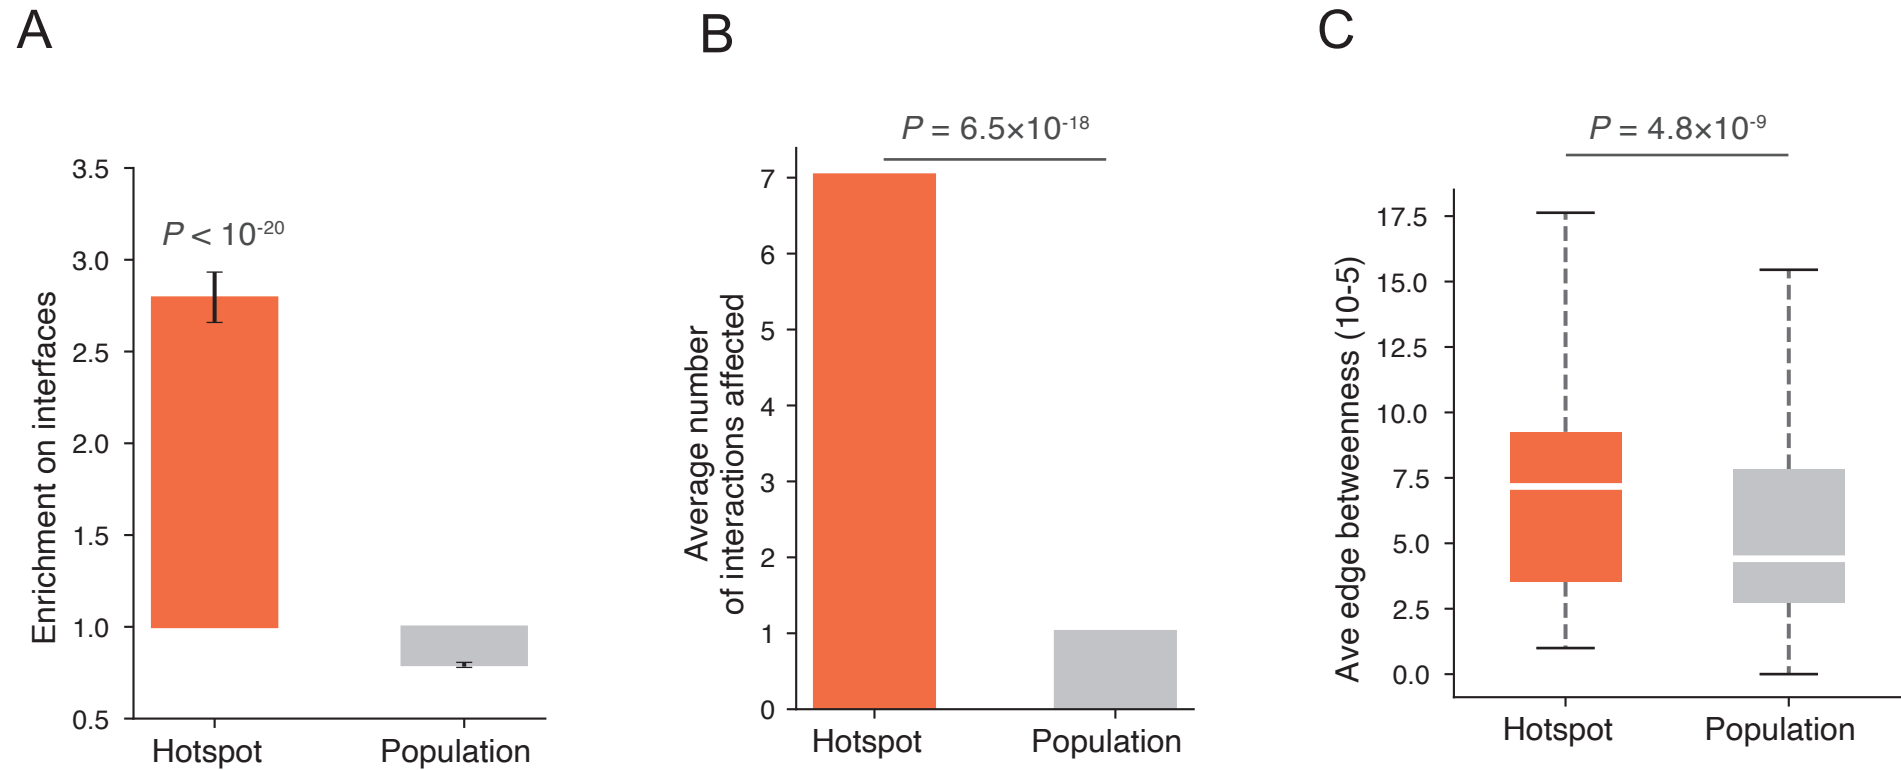

**Supplementary Fig. 1:** Network properties of mutational hotspots in comparison to population variants. **A**, Distribution of hotspots and population variants on proteins with regard to protein interaction interfaces. Enrichment was calculated as the ratio of the observed fraction of hotspots/variants that occur on interaction interfaces over the fraction of interface residues on corresponding proteins (expected fraction). **B**, Average number of protein interactions affected by hotspots and population variants. **C**, Average edge betweenness of interactions affected by hotspots and population variants.
