# Supplementary material for: A full-proteome, interaction-specific characterization of mutational hotspots across human cancers
Source: HighWire-hosted journal article supplement (doi:10.1101/gr.275437.121), 2021-12-28
Supplement: Supplementary_Fig_4.pdf [file Supplementary_Fig_4.pdf]

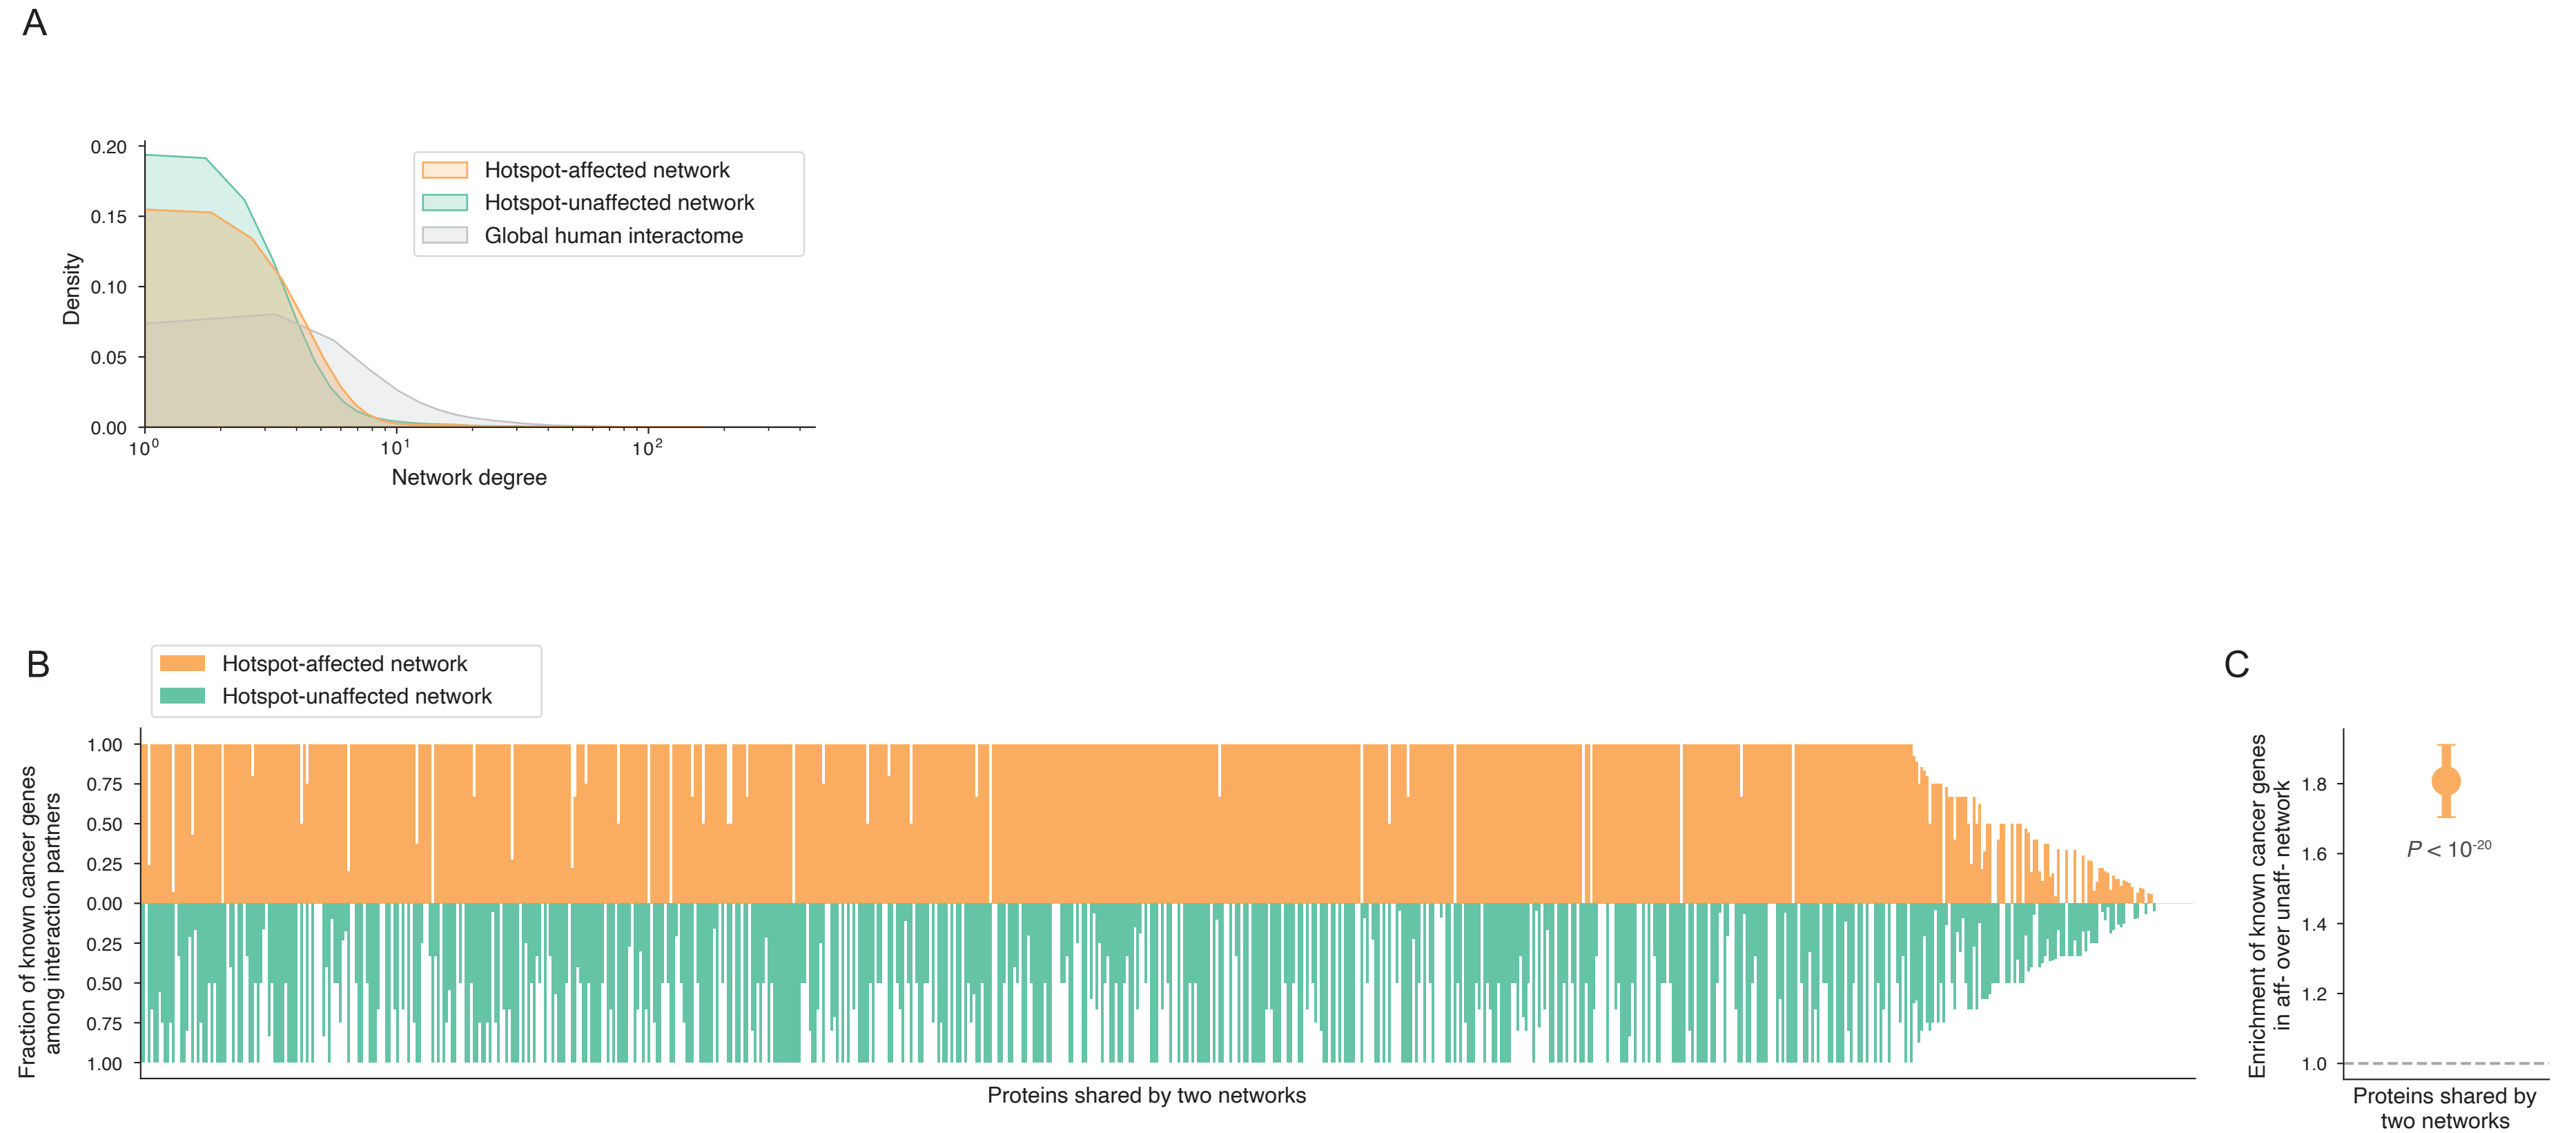

**Supplementary Fig. 4:** Interaction partners of proteins in the hotspot-affected and -unaffected networks. **A**, Distribution of the number of interaction partners (network degree) of proteins in the hotspot-affected, hotspot-unaffected, and the global protein interaction network. **B**, Fraction of interaction partners of proteins shared by the hotspot-affected and -unaffected networks to be known cancer genes. Each bar represents each of the 752 proteins shared by the two networks. **C**, Enrichment of known cancer genes among the interaction partners of proteins shared by the hotspot-affected and -unaffected networks. Enrichment was calculated as the relative proportion of known cancer genes among interaction partners in the affected- over the unaffected-network. Error bars indicate standard error of the enrichment.
