# Supplementary material for: A full-proteome, interaction-specific characterization of mutational hotspots across human cancers
Source: HighWire-hosted journal article supplement (doi:10.1101/gr.275437.121), 2021-12-28
Supplement: Supplementary_Table_1.xlsx [file Supplementary_Table_1.xlsx]

## Sheet: Legend
Supplementary Table 1: Mutational hotspots analyzed in this study (.xlsx)
The table provides full lists of (1) 1,107 unique missense hotspots and (2) ~40K non-recurrent missense vaiants mapped to canonical UniProt proteins are listed. Hotspots are ordered by their statistical significance (Q-value) indicated by corresponding studies.

## Sheet: Cancer_hotspots
Gene	Uniprot	Hotspot	Mutation_Count	Q-value	Study
KRAS	P01116	G13	264	0	Chang et al. 2017
PIK3CA	P42336	E545	633	0	Chang et al. 2017
KRAS	P01116	G12	2175	0	Chang et al. 2017
EGFR	P00533	L858	144	0	Chang et al. 2017
TP53	P04637	R248	560	0	Chang et al. 2017
TP53	P04637	R273	609	0	Chang et al. 2017
PIK3CA	P42336	E542	372	0	Chang et al. 2017
KRAS	P01116	Q61	190	0	Chang et al. 2017
TP53	P04637	R175	416	0	Chang et al. 2017
IDH1	O75874	R132	766	0	Chang et al. 2017
NRAS	P01111	Q61	422	0	Chang et al. 2017
PIK3CA	P42336	H1047	647	0	Chang et al. 2017
BRAF	P15056	V600	897	0	Chang et al. 2017
PIK3CA	P42336	E545	277	0	Chang et al. 2016
KRAS	P01116	G12	736	0	Chang et al. 2016
IDH1	O75874	R132	324	0	Chang et al. 2016
NRAS	P01111	Q61	235	0	Chang et al. 2016
PIK3CA	P42336	H1047	283	0	Chang et al. 2016
BRAF	P15056	V600	558	0	Chang et al. 2016
AKT1	P31749	E17	149	1.15e-288	Chang et al. 2017
GNAS	P63092	R201	139	7.47e-257	Chang et al. 2017
FGFR3	P22607	S249	114	3.49e-229	Chang et al. 2017
PIK3CA	P42336	N345	98	3.87e-219	Chang et al. 2017
PIK3CA	P42336	E542	145	1.07e-215	Chang et al. 2016
PTEN	P60484	R130	168	1.92e-210	Chang et al. 2017
HRAS	P01112	Q61	102	8.15e-210	Chang et al. 2017
TP53	P04637	Y220	152	4.54e-208	Chang et al. 2017
TP53	P04637	G245	242	8.55e-208	Chang et al. 2017
TP53	P04637	R213	256	1.29e-203	Chang et al. 2017
FBXW7	Q969H0	R465	128	1.92e-192	Chang et al. 2017
PIK3CA	P42336	Q546	93	1.38e-185	Chang et al. 2017
ERBB2	P04626	S310	113	1.98e-185	Chang et al. 2017
GNA11	P29992	Q209	59	3.54e-183	Chang et al. 2017
GNAQ	P50148	Q209	65	4.59e-172	Chang et al. 2017
GTF2I	P78347	L424	68	3.82e-165	Chang et al. 2017
TP53	P04637	R282	219	5.74e-160	Chang et al. 2017
CTNNB1	P35222	S37	103	2.59e-157	Chang et al. 2017
CTNNB1	P35222	D32	81	8.3e-155	Chang et al. 2017
SMAD4	Q13485	R361	124	1.13e-154	Chang et al. 2017
TP53	P04637	H179	149	9.19e-150	Chang et al. 2017
CTNNB1	P35222	S33	96	1.3e-144	Chang et al. 2017
KRAS	P01116	A146	86	5.76e-140	Chang et al. 2017
TP53	P04637	R273	253	9.66e-139	Chang et al. 2016
CTNNB1	P35222	T41	66	1.16e-135	Chang et al. 2017
EGFR	P00533	T790	60	1.11e-133	Chang et al. 2017
NRAS	P01111	G12	74	3.67e-130	Chang et al. 2017
SF3B1	O75533	K700	59	1.52e-126	Chang et al. 2017
TP53	P04637	H193	123	1.48e-124	Chang et al. 2017
ESR1	P03372	D538	46	1.29e-123	Chang et al. 2017
FBXW7	Q969H0	R505	83	5.9e-120	Chang et al. 2017
TP53	P04637	R248	216	7.57e-120	Chang et al. 2016
KRAS	P01116	G13	92	3.74e-119	Chang et al. 2016
IDH2	P48735	R172	63	1.2e-117	Chang et al. 2017
U2AF1	Q01081	S34	85	4.35e-116	Chang et al. 2017
EGFR	P00533	A289	59	5.81e-116	Chang et al. 2017
ESR1	P03372	Y537	47	6.21e-115	Chang et al. 2017
CDKN2A	P42771	R80	99	1.18e-111	Chang et al. 2017
CTNNB1	P35222	S45	71	2.67e-111	Chang et al. 2017
KRAS	P01116	Q61	75	1.23e-105	Chang et al. 2016
TP53	P04637	C176	115	2.8e-94	Chang et al. 2017
PIK3CA	P42336	R88	75	7.11e-94	Chang et al. 2017
ERBB3	P21860	V104	61	2.9e-90	Chang et al. 2017
PIK3CA	P42336	M1043	58	1.37e-88	Chang et al. 2017
TP53	P04637	Y163	79	6.76e-86	Chang et al. 2017
ERBB2	P04626	L755	44	1.41e-85	Chang et al. 2017
TP53	P04637	R342	137	1.47e-85	Chang et al. 2017
TP53	P04637	R196	141	4e-85	Chang et al. 2017
H3F3A	P84243	K28	33	5.33e-83	Chang et al. 2017
FGFR3	P22607	Y373	32	7.47e-83	Chang et al. 2017
BRAF	P15056	G469	61	3.65e-82	Chang et al. 2017
PIK3CA	P42336	C420	46	2.6e-80	Chang et al. 2017
HRAS	P01112	G13	50	5.5e-80	Chang et al. 2017
CTNNB1	P35222	G34	53	2.21e-79	Chang et al. 2017
TP53	P04637	I195	79	5.31e-77	Chang et al. 2017
HRAS	P01112	Q61	40	4.77e-76	Chang et al. 2016
CDKN2A	P42771	H83	62	1.31e-75	Chang et al. 2017
SF3B1	O75533	K700	34	7.71e-75	Chang et al. 2016
TP53	P04637	G266	117	1.58e-74	Chang et al. 2017
CTNNB1	P35222	D32	52	4.29e-74	Chang et al. 2016
TP53	P04637	R249	102	1.29e-72	Chang et al. 2017
SF3B1	O75533	R625	59	1.54e-72	Chang et al. 2017
CTNNB1	P35222	S33	53	3.57e-72	Chang et al. 2016
PIK3CA	P42336	Q546	46	1.58e-71	Chang et al. 2016
BRAF	P15056	K601	38	1.95e-70	Chang et al. 2017
FBXW7	Q969H0	R465	62	4.83e-70	Chang et al. 2016
BRAF	P15056	D594	51	9.79e-70	Chang et al. 2017
EZH2	Q15910	Y641	38	6.87e-69	Chang et al. 2017
TP53	P04637	Y234	68	4.21e-68	Chang et al. 2017
DNMT3A	Q9Y6K1	R882	39	1.74e-67	Chang et al. 2017
BCOR	Q6W2J9	N1459	36	2.04e-67	Chang et al. 2017
PIK3CA	P42336	N345	42	3.47e-66	Chang et al. 2016
PPP2R1A	P30153	P179	30	3.8e-66	Chang et al. 2017
RAC1	P63000	P29	53	1.56e-65	Chang et al. 2017
PIK3CA	P42336	G118	40	1.61e-65	Chang et al. 2017
CTNNB1	P35222	S37	50	1.09e-64	Chang et al. 2016
FBXW7	Q969H0	R479	57	4.38e-63	Chang et al. 2017
TP53	P04637	V173	78	7.26e-62	Chang et al. 2017
TP53	P04637	C238	77	7.75e-62	Chang et al. 2017
U2AF1	Q01081	S34	37	1.24e-61	Chang et al. 2016
PPP2R1A	P30153	R183	51	9.63e-61	Chang et al. 2017
MYD88	Q99836	L252	37	1.26e-60	Chang et al. 2017
PTEN	P60484	R130	93	5.33e-59	Chang et al. 2016
TP53	P04637	R175	154	2.24e-58	Chang et al. 2016
TP53	P04637	Y220	71	3.38e-58	Chang et al. 2016
NRAS	P01111	G13	41	3.6e-58	Chang et al. 2017
TP53	P04637	Y205	61	7.47e-58	Chang et al. 2017
PIK3CA	P42336	E726	55	1.11e-57	Chang et al. 2017
TP53	P04637	P151	79	1.3e-57	Chang et al. 2017
EGFR	P00533	G598	33	6.32e-57	Chang et al. 2017
TP53	P04637	R158	106	8.56e-57	Chang et al. 2017
TP53	P04637	Y236	59	1.3e-56	Chang et al. 2017
TP53	P04637	H179	71	2.81e-56	Chang et al. 2016
B2M	P61769	M1	41	3.77e-56	Chang et al. 2017
HRAS	P01112	G12	38	4.29e-56	Chang et al. 2017
TP53	P04637	H193	66	1.37e-55	Chang et al. 2016
EGFR	P00533	L858	30	1.96e-54	Chang et al. 2016
FGFR3	P22607	R248	31	2.24e-52	Chang et al. 2017
TP53	P04637	C275	70	9.26e-52	Chang et al. 2017
CTNNB1	P35222	T41	33	1.39e-51	Chang et al. 2016
H3F3A	P84243	K28	27	2.24e-50	Chang et al. 2016
TP53	P04637	C135	74	3.53e-50	Chang et al. 2017
TP53	P04637	P278	100	5.75e-50	Chang et al. 2017
IDH2	P48735	R140	23	1.58e-48	Chang et al. 2017
NRAS	P01111	G12	36	1.61e-48	Chang et al. 2016
SPOP	O43791	F133	67	9.29e-48	Chang et al. 2017
PIK3CA	P42336	K111	38	3.94e-47	Chang et al. 2017
TP53	P04637	S241	97	7.18e-46	Chang et al. 2017
EGFR	P00533	G719	33	1.16e-45	Chang et al. 2017
GNAS	P63092	R201	36	6.69e-45	Chang et al. 2016
TP53	P04637	M237	64	8.55e-45	Chang et al. 2017
RAC1	P63000	P29	31	1.92e-44	Chang et al. 2016
FGFR2	P21802	N549	26	2.64e-44	Chang et al. 2017
RXRA	P19793	S427	26	4.52e-44	Chang et al. 2017
NFE2L2	Q16236	R34	34	9.74e-44	Chang et al. 2017
TP53	P04637	V157	77	1.04e-43	Chang et al. 2017
MAP2K1	Q02750	K57	29	1.73e-43	Chang et al. 2017
AR	P10275	L701	19	2.57e-43	Chang et al. 2017
TP53	P04637	V272	66	9.59e-43	Chang et al. 2017
FLT3	P36888	D835	17	1.03e-41	Chang et al. 2017
AKT1	P31749	E17	49	2.66e-41	Chang et al. 2016
ATM	Q13315	R337	40	3.53e-41	Chang et al. 2017
EGFR	P00533	A289	28	7.33e-41	Chang et al. 2016
TP53	P04637	K132	83	1.67e-40	Chang et al. 2017
FBXW7	Q969H0	R505	40	3.86e-40	Chang et al. 2016
CIC	Q96RK0	R215	25	5.58e-40	Chang et al. 2017
CTNNB1	P35222	G34	33	2.08e-39	Chang et al. 2016
PIK3CA	P42336	E453	42	3.2e-39	Chang et al. 2017
TP53	P04637	R280	109	8.52e-39	Chang et al. 2017
GTF2I	P78347	N440	19	7.5e-38	Chang et al. 2017
TP53	P04637	C176	57	8.54e-38	Chang et al. 2016
TP53	P04637	G245	97	1.16e-37	Chang et al. 2016
NFE2L2	Q16236	E79	34	7.47e-37	Chang et al. 2017
ERBB2	P04626	R678	32	9.17e-37	Chang et al. 2017
TP53	P04637	S215	50	1.44e-36	Chang et al. 2017
BRAF	P15056	N581	21	3.87e-36	Chang et al. 2017
KIT	P10721	N822	21	2.31e-35	Chang et al. 2017
RHOA	P61586	G17	36	4.09e-35	Chang et al. 2017
CDK4	P11802	R24	23	5.35e-35	Chang et al. 2017
BRAF	P15056	G466	34	6.72e-35	Chang et al. 2017
AR	P10275	T877	15	8.21e-35	Chang et al. 2017
PTEN	P60484	R233	46	1.42e-34	Chang et al. 2017
CDKN2A	P42771	R80	51	3.73e-34	Chang et al. 2016
TP53	P04637	N239	41	3.84e-34	Chang et al. 2017
ERBB2	P04626	S310	26	4.27e-34	Chang et al. 2016
AR	P10275	H874	16	7.63e-34	Chang et al. 2017
POLE	Q07864	P286	27	1.12e-33	Chang et al. 2017
CREBBP	Q92793	R1446	33	1.12e-33	Chang et al. 2017
TP53	P04637	C242	59	1.18e-33	Chang et al. 2017
CD79B	P40259	Y196	16	1.25e-33	Chang et al. 2017
DNMT3A	Q9Y6K1	R882	31	3.44e-33	Chang et al. 2016
NFE2L2	Q16236	E82	21	4.9e-33	Chang et al. 2017
PIK3CA	P42336	V344	26	5.85e-33	Chang et al. 2017
MED12	Q93074	G44	25	1.21e-32	Chang et al. 2017
EGFR	P00533	L861	21	7.9e-32	Chang et al. 2017
ERBB4	Q15303	S1289	12	8.09e-32	Chang et al. 2017
TP53	P04637	G244	65	1e-31	Chang et al. 2017
CTNNB1	P35222	S45	28	1.25e-31	Chang et al. 2016
PIK3CA	P42336	R93	31	1.88e-31	Chang et al. 2017
MED12	Q93074	L1224	18	1.98e-31	Chang et al. 2017
ERCC2	P18074	N238	16	2.06e-31	Chang et al. 2017
FOXL2	P58012	C134	12	4.38e-31	Chang et al. 2017
SMAD4	Q13485	R361	41	6.93e-31	Chang et al. 2016
STK19	P49842	D89	18	7.08e-31	Chang et al. 2017
TP53	P04637	V274	46	9.09e-31	Chang et al. 2017
SPOP	O43791	F133	22	2.16e-30	Chang et al. 2016
PIK3CA	P42336	R108	29	2.18e-30	Chang et al. 2017
MAPK1	P28482	E322	26	2.78e-30	Chang et al. 2017
XPO1	O14980	E571	27	3.19e-30	Chang et al. 2017
TP53	P04637	I195	45	4.79e-30	Chang et al. 2016
IDH2	P48735	R172	19	8.43e-30	Chang et al. 2016
RHOA	P61586	Y42	19	8.63e-30	Chang et al. 2017
NFE2L2	Q16236	D29	30	1.2e-29	Chang et al. 2017
ERBB2	P04626	V777	20	2.2e-29	Chang et al. 2017
HRAS	P01112	G13	26	3.19e-29	Chang et al. 2016
KIT	P10721	D816	22	1.56e-28	Chang et al. 2017
KRAS	P01116	G60	24	2.37e-28	Chang et al. 2017
ALK	Q9UM73	R1275	18	6.65e-28	Chang et al. 2017
HRAS	P01112	G12	25	8.34e-28	Chang et al. 2016
PIK3CA	P42336	M1043	28	9.83e-28	Chang et al. 2016
CTNNB1	P35222	K335	19	1.26e-27	Chang et al. 2017
ALK	Q9UM73	F1174	14	1.97e-27	Chang et al. 2017
ERBB2	P04626	V842	26	2.9e-27	Chang et al. 2017
MAP2K1	Q02750	P124	25	5.99e-27	Chang et al. 2017
SMAD4	Q13485	D537	30	6.17e-27	Chang et al. 2017
TP53	P04637	E285	99	1.42e-26	Chang et al. 2017
TP53	P04637	R306	86	1.86e-26	Chang et al. 2017
MYD88	Q99836	L252	15	1.93e-26	Chang et al. 2016
TP53	P04637	H214	40	3.13e-26	Chang et al. 2017
SMARCA4	P51532	T910	29	3.38e-26	Chang et al. 2017
PIK3CA	P42336	G106	22	6.87e-26	Chang et al. 2017
ERBB3	P21860	V104	26	1.23e-25	Chang et al. 2016
HIST1H3B	P68431	K28	12	1.52e-25	Chang et al. 2017
NRAS	P01111	G13	22	1.84e-25	Chang et al. 2016
POLE	Q07864	V411	18	2.56e-25	Chang et al. 2017
PIK3CA	P42336	G118	24	2.89e-25	Chang et al. 2016
BRAF	P15056	G469	23	3.47e-25	Chang et al. 2016
FGFR1	P11362	N546	19	5.28e-25	Chang et al. 2017
TP53	P04637	E286	73	7.08e-25	Chang et al. 2017
BRAF	P15056	K601	15	1.12e-24	Chang et al. 2016
KRAS	P01116	A146	28	1.19e-24	Chang et al. 2016
ERBB2	P04626	L755	14	1.74e-24	Chang et al. 2016
RAF1	P04049	S257	25	3.23e-24	Chang et al. 2017
IDH2	P48735	R140	21	3.7e-24	Chang et al. 2016
FGFR2	P21802	S252	22	4.17e-24	Chang et al. 2017
APC	P25054	R876	27	4.54e-24	Chang et al. 2016
KRAS	P01116	K117	18	5.41e-24	Chang et al. 2017
EGFR	P00533	R108	19	5.53e-24	Chang et al. 2017
PIK3R1	P27986	N564	17	1.08e-23	Chang et al. 2017
NFE2L2	Q16236	G31	21	2.43e-23	Chang et al. 2017
NFE2L2	Q16236	G81	19	2.6e-23	Chang et al. 2017
TCEB1	Q15369	Y79	10	2.67e-23	Chang et al. 2017
TP53	P04637	R249	48	4.92e-23	Chang et al. 2016
MAP2K1	Q02750	F53	17	7.28e-23	Chang et al. 2017
ERBB3	P21860	E928	17	8.05e-23	Chang et al. 2017
ERBB3	P21860	D297	22	8.05e-23	Chang et al. 2017
TP53	P04637	R282	91	9.9e-23	Chang et al. 2016
TP53	P04637	C141	47	1.81e-22	Chang et al. 2017
TP53	P04637	D281	69	3.56e-22	Chang et al. 2017
B2M	P61769	M1	18	3.91e-22	Chang et al. 2016
PIK3CA	P42336	C420	18	5.69e-22	Chang et al. 2016
EP300	Q09472	D1399	23	6.88e-22	Chang et al. 2017
TP53	P04637	V216	42	7.06e-22	Chang et al. 2017
NUP93	Q8N1F7	Q15	16	7.38e-22	Chang et al. 2017
SMAD4	Q13485	G386	22	8.22e-22	Chang et al. 2017
TP53	P04637	R337	68	8.7e-22	Chang et al. 2017
EGFR	P00533	S768	15	1.19e-21	Chang et al. 2017
TP53	P04637	Y163	38	1.85e-21	Chang et al. 2016
STK19	P49842	D89	18	3.48e-21	Chang et al. 2016
PTPN11	Q06124	A72	18	3.59e-21	Chang et al. 2017
POLE	Q07864	P286	16	4.08e-21	Chang et al. 2016
MYCN	P04198	P44	20	7.36e-21	Chang et al. 2017
FGFR3	P22607	S249	18	1.07e-20	Chang et al. 2016
PDGFRA	P16234	D842	12	1.11e-20	Chang et al. 2017
TP53	P04637	Y126	33	1.54e-20	Chang et al. 2017
FGFR2	P21802	N550	13	1.85e-20	Chang et al. 2016
NFE2L2	Q16236	T80	15	2.59e-20	Chang et al. 2017
PIK3CA	P42336	G1049	17	2.76e-20	Chang et al. 2017
ESR1	P03372	L536	14	2.97e-20	Chang et al. 2017
SF3B1	O75533	E902	17	3.69e-20	Chang et al. 2017
TP53	P04637	A159	52	4.57e-20	Chang et al. 2017
SLC27A5	Q9Y2P5	T554	14	5.9e-20	Chang et al. 2016
TP53	P04637	I255	32	6.05e-20	Chang et al. 2017
EZH2	Q15910	Y641	14	6.39e-20	Chang et al. 2016
PPP6C	O00743	R264	19	1.19e-19	Chang et al. 2017
PIK3CA	P42336	Y1021	14	1.33e-19	Chang et al. 2017
KIT	P10721	K642	14	1.34e-19	Chang et al. 2017
TP53	P04637	L194	49	1.51e-19	Chang et al. 2017
PIK3R1	P27986	G376	18	1.68e-19	Chang et al. 2017
NFE2L2	Q16236	E79	20	2.31e-19	Chang et al. 2016
PIK3CA	P42336	R38	22	3.16e-19	Chang et al. 2017
MET	P08581	D1010	14	3.43e-19	Chang et al. 2017
ARID1A	O14497	R1989	29	3.63e-19	Chang et al. 2017
SPOP	O43791	F102	24	1.62e-18	Chang et al. 2017
PIK3CA	P42336	N1044	14	1.63e-18	Chang et al. 2017
MAX	P61244	R60	23	1.64e-18	Chang et al. 2017
PPP2R1A	P30153	S256	14	3.22e-18	Chang et al. 2017
NFE2L2	Q16236	D29	19	3.26e-18	Chang et al. 2016
PIK3CA	P42336	E81	25	4.02e-18	Chang et al. 2017
FGFR2	P21802	C382	15	4.77e-18	Chang et al. 2017
CDKN2A	P42771	P114	31	6.37e-18	Chang et al. 2017
ESR1	P03372	E380	14	2.07e-17	Chang et al. 2017
SMAD4	Q13485	D351	20	2.31e-17	Chang et al. 2017
PIK3CA	P42336	K111	21	2.61e-17	Chang et al. 2016
TP53	P04637	C238	34	2.81e-17	Chang et al. 2016
ERBB3	P21860	K329	12	3.3e-17	Chang et al. 2017
PIK3R1	P27986	K567	12	3.35e-17	Chang et al. 2017
PIK3CA	P42336	R88	40	5.17e-17	Chang et al. 2016
CDKN2A	P42771	D108	29	5.41e-17	Chang et al. 2017
KIT	P10721	V559	14	5.6e-17	Chang et al. 2017
CDKN2A	P42771	D84	26	6.27e-17	Chang et al. 2017
PIK3CA	P42336	E726	24	6.73e-17	Chang et al. 2016
MTOR	P42345	S2215	22	1.24e-16	Chang et al. 2017
TGFBR2	P37173	R528	23	1.74e-16	Chang et al. 2017
RHEB	Q15382	Y35	12	4.98e-16	Chang et al. 2017
EGFR	P00533	G598	19	5.03e-16	Chang et al. 2016
RQCD1	Q92600	P131	14	5.53e-16	Chang et al. 2016
KIT	P10721	L576	14	6.1e-16	Chang et al. 2017
KIT	P10721	V654	8	6.35e-16	Chang et al. 2017
FLT3	P36888	D835	17	7.51e-16	Chang et al. 2016
MTOR	P42345	T1977	14	7.6e-16	Chang et al. 2017
CDKN2A	P42771	H83	19	9.29e-16	Chang et al. 2016
BRAF	P15056	N581	11	1.11e-15	Chang et al. 2016
TP53	P04637	F270	30	1.26e-15	Chang et al. 2017
H3F3A	P84243	G35	12	1.62e-15	Chang et al. 2017
TP53	P04637	V173	32	1.82e-15	Chang et al. 2016
TP53	P04637	C275	32	1.87e-15	Chang et al. 2016
BRAF	P15056	G466	17	2.31e-15	Chang et al. 2016
RRAS2	P62070	Q72	9	6.59e-15	Chang et al. 2017
TP53	P04637	Y205	31	6.95e-15	Chang et al. 2016
RRAS2	P62070	Q72	9	8e-15	Chang et al. 2016
PTEN	P60484	R173	32	1.02e-14	Chang et al. 2017
TP53	P04637	Y234	31	1.35e-14	Chang et al. 2016
CREBBP	Q92793	Y1503	9	1.4e-14	Chang et al. 2017
TP53	P04637	E258	47	1.51e-14	Chang et al. 2017
PIK3CA	P42336	C901	13	1.63e-14	Chang et al. 2017
GATA3	P23771	M293	9	1.78e-14	Chang et al. 2017
CTNNB1	P35222	N387	11	2.74e-14	Chang et al. 2017
ERBB4	Q15303	Q707	11	2.79e-14	Chang et al. 2017
PPP2R1A	P30153	R183	19	3.71e-14	Chang et al. 2016
RET	P07949	M918	11	3.89e-14	Chang et al. 2017
CIC	Q96RK0	R202	13	8.49e-14	Chang et al. 2017
CDKN2A	P42771	Q50	23	9.46e-14	Chang et al. 2017
FOXA1	P55317	F266	11	1.06e-13	Chang et al. 2017
ERBB3	P21860	A232	15	1.12e-13	Chang et al. 2017
NFE2L2	Q16236	E82	11	1.6e-13	Chang et al. 2016
SPOP	O43791	Y87	14	1.97e-13	Chang et al. 2017
SPOP	O43791	W131	23	1.97e-13	Chang et al. 2017
RXRA	P19793	S427	14	2.18e-13	Chang et al. 2016
MTOR	P42345	I2500	10	2.29e-13	Chang et al. 2017
SMARCB1	Q12824	R377	17	2.33e-13	Chang et al. 2017
PIK3CB	P42338	D1067	13	2.85e-13	Chang et al. 2017
MTOR	P42345	S2215	14	3.24e-13	Chang et al. 2016
HIST1H3B	P68431	K28	12	3.41e-13	Chang et al. 2016
FGFR3	P22607	G370	8	4.34e-13	Chang et al. 2017
SF3B1	O75533	K666	13	7.29e-13	Chang et al. 2017
VHL	P40337	S65	17	7.41e-13	Chang et al. 2017
CDK4	P11802	K22	7	8.19e-13	Chang et al. 2017
TP53	P04637	F134	24	8.6e-13	Chang et al. 2017
KIT	P10721	W557	12	9.17e-13	Chang et al. 2017
PPP2R1A	P30153	P179	13	1.56e-12	Chang et al. 2016
CREBBP	Q92793	R1446	16	1.67e-12	Chang et al. 2016
POLE	Q07864	V411	10	1.76e-12	Chang et al. 2016
EGFR	P00533	R252	16	1.97e-12	Chang et al. 2017
EGFR	P00533	R222	16	1.97e-12	Chang et al. 2017
FGFR3	P22607	K650	10	2.01e-12	Chang et al. 2017
SMARCA4	P51532	G1232	17	2.11e-12	Chang et al. 2017
ARID2	Q68CP9	S297	20	2.23e-12	Chang et al. 2017
HIST1H1C	P16403	A180	22	3.16e-12	Chang et al. 2017
ERBB3	P21860	G284	13	4.1e-12	Chang et al. 2017
ERBB2	P04626	D769	18	4.15e-12	Chang et al. 2017
STK11	Q15831	E223	15	5.44e-12	Chang et al. 2017
EP300	Q09472	D1399	18	5.93e-12	Chang et al. 2016
FGFR1	P11362	K656	11	6.61e-12	Chang et al. 2017
BRAF	P15056	D594	12	6.61e-12	Chang et al. 2016
SOX17	Q9H6I2	S403	8	7.19e-12	Chang et al. 2017
NUP93	Q8N1F7	E14	16	8.46e-12	Chang et al. 2017
TP53	P04637	M246	37	1.11e-11	Chang et al. 2017
TP53	P04637	R110	43	1.13e-11	Chang et al. 2017
APC	P25054	Q1429	23	1.21e-11	Chang et al. 2017
RHOA	P61586	Y42	11	1.26e-11	Chang et al. 2016
PTEN	P60484	C136	14	1.53e-11	Chang et al. 2017
PTEN	P60484	G132	17	1.53e-11	Chang et al. 2017
FBXW7	Q969H0	R479	24	1.53e-11	Chang et al. 2016
CCND1	P24385	Y44	8	1.65e-11	Chang et al. 2017
SMARCA4	P51532	R1192	17	1.7e-11	Chang et al. 2017
INPPL1	O15357	A1185	11	1.76e-11	Chang et al. 2017
MAP2K1	Q02750	P124	15	2.05e-11	Chang et al. 2016
SMAD4	Q13485	P356	16	2.15e-11	Chang et al. 2017
ERBB3	P21860	S846	10	2.59e-11	Chang et al. 2017
MAP2K1	Q02750	K57	10	2.98e-11	Chang et al. 2016
STK11	Q15831	D194	14	3.49e-11	Chang et al. 2017
FBXW7	Q969H0	R658	20	3.79e-11	Chang et al. 2017
AR	P10275	W741	7	4.1e-11	Chang et al. 2017
TP53	P04637	C135	28	4.65e-11	Chang et al. 2016
TP53	P04637	V143	26	5.18e-11	Chang et al. 2017
CCND1	P24385	P287	12	5.66e-11	Chang et al. 2017
CIC	Q96RK0	R1512	11	6.02e-11	Chang et al. 2017
PIK3CA	P42336	E453	20	6.4e-11	Chang et al. 2016
FBXW7	Q969H0	R689	19	6.54e-11	Chang et al. 2017
MAP2K1	Q02750	E203	16	6.87e-11	Chang et al. 2017
FOXA1	P55317	I176	11	7.66e-11	Chang et al. 2017
DICER1	Q9UPY3	E1813	11	1.04e-10	Chang et al. 2017
PTPN11	Q06124	E76	13	1.05e-10	Chang et al. 2017
ERBB2	P04626	V842	14	1.31e-10	Chang et al. 2016
KNSTRN	Q9Y448	S24	13	1.47e-10	Chang et al. 2017
NF1	P21359	R440	19	1.56e-10	Chang et al. 2017
EGFR	P00533	L747	8	1.57e-10	Chang et al. 2017
NUP93	Q8N1F7	E14	11	1.59e-10	Chang et al. 2016
NFE2L2	Q16236	T80	9	1.96e-10	Chang et al. 2016
ACVR1	Q04771	G328	7	2.17e-10	Chang et al. 2017
CCND1	P24385	T286	9	2.39e-10	Chang et al. 2017
FGFR3	P22607	Y373	8	2.78e-10	Chang et al. 2016
VHL	P40337	L89	15	2.85e-10	Chang et al. 2017
NOTCH2	Q04721	T235	10	2.89e-10	Chang et al. 2017
CIC	Q96RK0	R1515	10	3.21e-10	Chang et al. 2017
NFE2L2	Q16236	L30	12	3.26e-10	Chang et al. 2017
TP53	P04637	S127	48	3.33e-10	Chang et al. 2017
SF3B1	O75533	N626	8	3.35e-10	Chang et al. 2017
EGFR	P00533	E709	16	3.57e-10	Chang et al. 2017
TP53	P04637	Q136	31	3.67e-10	Chang et al. 2017
ERBB3	P21860	H228	8	4.4e-10	Chang et al. 2017
ATM	Q13315	R337	18	5.19e-10	Chang et al. 2016
TP53	P04637	C277	28	5.27e-10	Chang et al. 2017
APC	P25054	Q1367	29	5.93e-10	Chang et al. 2017
ERCC2	P18074	T484	8	5.95e-10	Chang et al. 2017
MYOD1	P15172	L122	7	6.1e-10	Chang et al. 2017
KNSTRN	Q9Y448	S24	13	7.71e-10	Chang et al. 2016
FOXA1	P55317	H247	10	8.78e-10	Chang et al. 2017
GNAS	P63092	Q227	11	9.93e-10	Chang et al. 2017
CTNNB1	P35222	H36	8	1.23e-09	Chang et al. 2017
NFE2L2	Q16236	W24	11	1.26e-09	Chang et al. 2017
NFE2L2	Q16236	G81	10	1.34e-09	Chang et al. 2016
HRAS	P01112	K117	9	1.37e-09	Chang et al. 2017
TP53	P04637	E298	37	1.5e-09	Chang et al. 2017
CTNNB1	P35222	K335	9	1.6e-09	Chang et al. 2016
ARID1A	O14497	R2158	15	1.62e-09	Chang et al. 2017
ATM	Q13315	R3008	15	1.75e-09	Chang et al. 2017
TP53	P04637	M237	24	1.88e-09	Chang et al. 2016
EGFR	P00533	L62	10	1.9e-09	Chang et al. 2017
KIT	P10721	D820	11	1.92e-09	Chang et al. 2017
SOS1	Q07889	N233	7	2.8e-09	Chang et al. 2016
NFE2L2	Q16236	Q26	9	2.81e-09	Chang et al. 2017
PTEN	P60484	D92	18	2.81e-09	Chang et al. 2017
TET1	Q8NFU7	P1752	10	2.88e-09	Chang et al. 2017
FGFR4	P22455	V550	11	2.95e-09	Chang et al. 2017
KRAS	P01116	A59	12	3.18e-09	Chang et al. 2017
SMAD4	Q13485	G386	11	3.31e-09	Chang et al. 2016
DIS3	Q9Y2L1	D488	11	3.46e-09	Chang et al. 2017
CDH1	P12830	D254	11	3.47e-09	Chang et al. 2017
PTEN	P60484	R233	28	3.67e-09	Chang et al. 2016
CDKN2A	P42771	E88	27	3.7e-09	Chang et al. 2017
MAPK1	P28482	E322	16	4e-09	Chang et al. 2016
MYD88	Q99836	S230	7	4.78e-09	Chang et al. 2017
PIK3CA	P42336	G1007	10	5.22e-09	Chang et al. 2017
PTEN	P60484	Y68	11	5.28e-09	Chang et al. 2017
INPPL1	O15357	A1185	8	5.91e-09	Chang et al. 2016
GNAQ	P50148	T96	9	6.2e-09	Chang et al. 2017
SETD2	Q9BYW2	R1625	13	6.84e-09	Chang et al. 2017
TP53	P04637	R196	67	6.92e-09	Chang et al. 2016
SDHA	P31040	L639	7	7.18e-09	Chang et al. 2017
TP53	P04637	G266	46	7.47e-09	Chang et al. 2016
PIK3CA	P42336	T1025	8	8.49e-09	Chang et al. 2017
TP53	P04637	C242	24	8.62e-09	Chang et al. 2016
ERBB3	P21860	D297	11	9.18e-09	Chang et al. 2016
SOS1	Q07889	N233	7	9.34e-09	Chang et al. 2017
CDKN2A	P42771	Q50	16	9.77e-09	Chang et al. 2016
PIK3CA	P42336	C378	9	9.91e-09	Chang et al. 2017
FOXA1	P55317	M253	7	1.06e-08	Chang et al. 2017
ARID1A	O14497	R1276	15	1.09e-08	Chang et al. 2017
MYCN	P04198	P44	9	1.09e-08	Chang et al. 2016
EIF1AX	P47813	G9	11	1.15e-08	Chang et al. 2017
FGFR3	P22607	G380	11	1.21e-08	Chang et al. 2017
POM121	Q96HA1	N359	7	1.23e-08	Chang et al. 2016
FBXW7	Q969H0	R367	17	1.29e-08	Chang et al. 2017
TP53	P04637	R213	103	1.29e-08	Chang et al. 2016
TCF7L2	Q9NQB0-7	R471	14	1.3e-08	Chang et al. 2017
RHOA	P61586	R5	17	1.52e-08	Chang et al. 2017
TP53	P04637	Y236	23	2.01e-08	Chang et al. 2016
PIK3CA	P42336	D350	12	2.17e-08	Chang et al. 2017
MAP2K1	Q02750	G128	10	2.5e-08	Chang et al. 2017
PTEN	P60484	H93	12	2.9e-08	Chang et al. 2017
SF3B1	O75533	K741	10	3.09e-08	Chang et al. 2017
BRAF	P15056	L597	10	3.7e-08	Chang et al. 2017
XPO1	O14980	E571	14	4.11e-08	Chang et al. 2016
RAC1	P63000	A159	12	4.64e-08	Chang et al. 2017
VHL	P40337	S80	11	4.73e-08	Chang et al. 2017
CDKN2A	P42771	P114	15	5.43e-08	Chang et al. 2016
NF1	P21359	R2450	17	5.46e-08	Chang et al. 2017
MYO18A	Q92614	G979	7	5.52e-08	Chang et al. 2016
RB1	P06400	R251	16	5.88e-08	Chang et al. 2017
PIK3CB	P42338	E1051	11	5.96e-08	Chang et al. 2017
ACVR1	Q04771	R258	6	6.83e-08	Chang et al. 2017
TP53	P04637	P151	30	7.03e-08	Chang et al. 2016
GNAQ	P50148	T96	7	7.04e-08	Chang et al. 2016
BNC2	Q6ZN30	S575	8	7.82e-08	Chang et al. 2016
TP63	Q9H3D4	R379	17	8.73e-08	Chang et al. 2017
MAX	P61244	H28	6	8.97e-08	Chang et al. 2017
NFE2L2	Q16236	Q26	7	9.26e-08	Chang et al. 2016
ERCC2	P18074	Y24	5	9.9e-08	Chang et al. 2017
PTPN11	Q06124	Q514	9	1.01e-07	Chang et al. 2017
CDK4	P11802	R24	11	1.03e-07	Chang et al. 2016
LRP1	Q07954	P1058	8	1.05e-07	Chang et al. 2016
DTD2	Q96FN9	R6	11	1.1e-07	Chang et al. 2016
SMAD4	Q13485	R445	17	1.11e-07	Chang et al. 2017
ARAF	P10398	S214	12	1.12e-07	Chang et al. 2017
RAF1	P04049	S259	12	1.12e-07	Chang et al. 2017
TP53	P04637	G154	25	1.15e-07	Chang et al. 2017
MYC	P01106	P74	12	1.18e-07	Chang et al. 2017
PIK3CA	P42336	P104	11	1.61e-07	Chang et al. 2017
CTCF	P49711	R377	12	1.65e-07	Chang et al. 2017
RHEB	Q15382	Y35	6	1.71e-07	Chang et al. 2016
TP53	P04637	L130	30	2.06e-07	Chang et al. 2017
STAG2	Q8N3U4	R216	14	2.21e-07	Chang et al. 2017
TP53	P04637	R280	41	2.47e-07	Chang et al. 2016
FGFR3	P22607	S371	5	2.54e-07	Chang et al. 2017
SF3B1	O75533	G742	8	2.57e-07	Chang et al. 2017
SNRPD3	P62318	G96	7	2.59e-07	Chang et al. 2016
GPRIN2	O60269	T100	7	2.77e-07	Chang et al. 2016
ALK	Q9UM73	F1174	9	3e-07	Chang et al. 2016
MED12	Q93074	L1224	10	3.01e-07	Chang et al. 2016
ARL16	Q0P5N6	G6	7	3.03e-07	Chang et al. 2016
MAGOH	P61326	I137	6	3.03e-07	Chang et al. 2016
CCT8	P50990	I86	6	3.15e-07	Chang et al. 2016
TGFBR1	P36897	S241	15	3.26e-07	Chang et al. 2017
CCND1	P24385	Y44	7	3.48e-07	Chang et al. 2016
CDKN2A	P42771	E120	18	3.49e-07	Chang et al. 2017
PAX5	Q02548	V26	9	3.72e-07	Chang et al. 2017
STAT3	P40763	H410	6	3.92e-07	Chang et al. 2017
CRNKL1	Q9BZJ0	S128	10	3.99e-07	Chang et al. 2016
TP53	P04637	K132	34	4e-07	Chang et al. 2016
FBXW7	Q969H0	S582	12	4.02e-07	Chang et al. 2017
RHOA	P61586	A161	7	4.2e-07	Chang et al. 2017
EP300	Q09472	Y1414	7	4.31e-07	Chang et al. 2017
ERBB3	P21860	E332	14	4.75e-07	Chang et al. 2017
NT5C3A	Q9H0P0	D322	6	4.75e-07	Chang et al. 2016
EP300	Q09472	W1466	8	4.82e-07	Chang et al. 2017
EP300	Q09472	Y1467	8	4.82e-07	Chang et al. 2017
MET	P08581	M1250	6	5.24e-07	Chang et al. 2017
MET	P08581	V1070	5	5.24e-07	Chang et al. 2017
EGFR	P00533	L861	7	5.42e-07	Chang et al. 2016
ATM	Q13315	R250	15	5.73e-07	Chang et al. 2017
TP53	P04637	C141	23	5.85e-07	Chang et al. 2016
PIK3CA	P42336	M1	6	6.06e-07	Chang et al. 2017
SDHA	P31040	S445	10	7.3e-07	Chang et al. 2017
SMAD4	Q13485	G419	8	7.34e-07	Chang et al. 2017
RIMS1	Q86UR5	R71	7	7.62e-07	Chang et al. 2016
OXA1L	Q2M1J6	L57	9	7.73e-07	Chang et al. 2016
SMARCA4	P51532	M781	9	8.44e-07	Chang et al. 2017
FOXA1	P55317	R261	9	8.58e-07	Chang et al. 2017
FBXW7	Q969H0	Y545	7	9.3e-07	Chang et al. 2017
APC	P25054	Q1429	7	1.04e-06	Chang et al. 2016
ERBB4	Q15303	L798	11	1.05e-06	Chang et al. 2017
VHL	P40337	S111	10	1.15e-06	Chang et al. 2017
SPOP	O43791	W131	7	1.15e-06	Chang et al. 2016
KIT	P10721	Y823	6	1.19e-06	Chang et al. 2017
TPTE2	Q6XPS3	M41	8	1.36e-06	Chang et al. 2016
BCL6	P41182	R594	12	1.37e-06	Chang et al. 2017
TRUB1	Q8WWH5	T34	6	1.42e-06	Chang et al. 2016
ACADS	P16219	R330	10	1.5e-06	Chang et al. 2016
ACSBG2	Q5FVE4	I250	5	1.53e-06	Chang et al. 2016
SPTA1	P02549	K1732	7	1.61e-06	Chang et al. 2016
U2AF1	Q01081	Q157	4	1.62e-06	Chang et al. 2017
TP53	P04637	V274	21	1.69e-06	Chang et al. 2016
ATM	Q13315	N2875	8	1.7e-06	Chang et al. 2017
PTPN11	Q06124	E69	11	1.81e-06	Chang et al. 2017
PTPN11	Q06124	Q514	7	1.84e-06	Chang et al. 2016
FUBP1	Q96AE4	R430	12	1.92e-06	Chang et al. 2017
MTOR	P42345	L2427	7	1.97e-06	Chang et al. 2017
MTOR	P42345	F1888	8	1.97e-06	Chang et al. 2017
SF3B1	O75533	N626	6	2.06e-06	Chang et al. 2016
FBXW7	Q969H0	G423	10	2.07e-06	Chang et al. 2017
RAC1	P63000	A159	10	2.27e-06	Chang et al. 2016
KRAS	P01116	G60	11	2.28e-06	Chang et al. 2016
ARIH1	Q9Y4X5	A409	6	2.28e-06	Chang et al. 2016
TP53	P04637	V216	20	2.64e-06	Chang et al. 2016
EPAS1	Q99814	P531	4	2.75e-06	Chang et al. 2017
PIK3R1	P27986	N564	6	2.89e-06	Chang et al. 2016
PIK3R1	P27986	G376	9	2.9e-06	Chang et al. 2016
PTEN	P60484	Y27	10	2.97e-06	Chang et al. 2017
VHL	P40337	N78	9	3.06e-06	Chang et al. 2017
ACVR1	Q04771	R206	8	3.1e-06	Chang et al. 2017
PIK3CA	P42336	Y1021	9	3.18e-06	Chang et al. 2016
AKT1	P31749	L52	5	3.31e-06	Chang et al. 2017
IL7R	P16871	K395	12	3.45e-06	Chang et al. 2017
SMARCA4	P51532	R1189	12	3.57e-06	Chang et al. 2017
PTPN11	Q06124	G507	9	3.59e-06	Chang et al. 2017
C5orf49	A4QMS7	K130	6	3.65e-06	Chang et al. 2016
ARID1A	O14497	G2087	13	3.82e-06	Chang et al. 2017
NPAS1	Q99742	F159	7	3.89e-06	Chang et al. 2016
CASP8	Q14790	R233	13	4.28e-06	Chang et al. 2017
TP53	P04637	P152	38	4.47e-06	Chang et al. 2017
NFE2L2	Q16236	L30	8	4.52e-06	Chang et al. 2016
RAF1	P04049	S257	12	4.76e-06	Chang et al. 2016
MTOR	P42345	E1799	12	5.33e-06	Chang et al. 2017
KIAA1468	Q9P260	Q579	6	5.44e-06	Chang et al. 2016
KMT2D	O14686	R5179	10	5.55e-06	Chang et al. 2017
EZH2	Q15910	K510	8	5.87e-06	Chang et al. 2017
ERBB3	P21860	M91	12	5.89e-06	Chang et al. 2017
PBRM1	Q86U86	R1185	13	6.01e-06	Chang et al. 2017
SF3B1	O75533	R625	11	6.52e-06	Chang et al. 2016
SPOP	O43791	M117	7	6.82e-06	Chang et al. 2017
AHI1	Q8N157	Q294	5	6.91e-06	Chang et al. 2016
PIK3CD	O00329	E1021	8	7.5e-06	Chang et al. 2017
FGFR1	P11362	K656	7	7.52e-06	Chang et al. 2016
TP53	P04637	H168	19	7.6e-06	Chang et al. 2017
KIT	P10721	K642	6	7.66e-06	Chang et al. 2016
CCND3	P30281	I290	4	7.73e-06	Chang et al. 2017
TP53	P04637	S241	40	7.75e-06	Chang et al. 2016
OBP2B	Q9NPH6	S133	5	7.91e-06	Chang et al. 2016
TP53	P04637	R267	36	8.42e-06	Chang et al. 2017
TP53	P04637	W146	27	8.42e-06	Chang et al. 2017
TP53	P04637	A161	26	8.66e-06	Chang et al. 2017
SMO	Q99835	L412	6	8.71e-06	Chang et al. 2017
TP53	P04637	L194	23	9.05e-06	Chang et al. 2016
MAP2K1	Q02750	F53	6	9.12e-06	Chang et al. 2016
PIK3CA	P42336	E365	13	9.16e-06	Chang et al. 2017
GNA11	P29992	Q209	5	9.33e-06	Chang et al. 2016
MAPK7	Q13164	A501	6	9.5e-06	Chang et al. 2016
PRSS27	Q9BQR3	V246	5	1.03e-05	Chang et al. 2016
PCDHA10	Q9Y5I2	G539	9	1.08e-05	Chang et al. 2016
PRKCI	P41743	R480	10	1.25e-05	Chang et al. 2017
MAP2K2	P36507	F57	5	1.29e-05	Chang et al. 2016
PTPN11	Q06124	A72	7	1.33e-05	Chang et al. 2016
SMAD4	Q13485	G352	11	1.38e-05	Chang et al. 2017
PIK3R2	O00459	G373	9	1.38e-05	Chang et al. 2017
PIK3R2	O00459	D557	9	1.38e-05	Chang et al. 2017
FAM46D	Q8NEK8	S69	6	1.43e-05	Chang et al. 2016
TP53	P04637	V272	25	1.43e-05	Chang et al. 2016
SYT13	Q7L8C5	P228	8	1.43e-05	Chang et al. 2016
PTPRT	O14522	E548	12	1.45e-05	Chang et al. 2017
PTN	P21246	K44	7	1.46e-05	Chang et al. 2016
TP53	P04637	K164	13	1.47e-05	Chang et al. 2017
MET	P08581	F1200	4	1.5e-05	Chang et al. 2017
TP53	P04637	P278	37	1.5e-05	Chang et al. 2016
ERCC2	P18074	Y72	4	1.61e-05	Chang et al. 2017
CTCF	P49711	Y226	4	1.66e-05	Chang et al. 2017
ZBTB7A	O95365	K424	5	1.69e-05	Chang et al. 2016
RHOA	P61586	E47	11	1.7e-05	Chang et al. 2017
APC	P25054	Q1406	19	1.71e-05	Chang et al. 2017
SMAD4	Q13485	Q534	10	1.79e-05	Chang et al. 2017
ERBB2	P04626	L869	4	1.83e-05	Chang et al. 2017
FGFR1	P11362	N546	6	1.92e-05	Chang et al. 2016
STK11	Q15831	S216	12	1.94e-05	Chang et al. 2017
TP53	P04637	H214	16	2.08e-05	Chang et al. 2016
KNSTRN	Q9Y448	V12	5	2.11e-05	Chang et al. 2017
CTNNB1	P35222	I35	8	2.13e-05	Chang et al. 2017
TP53	P04637	Q144	23	2.18e-05	Chang et al. 2017
ERBB2	P04626	R678	9	2.2e-05	Chang et al. 2016
MET	P08581	Y1230	4	2.27e-05	Chang et al. 2017
PTEN	P60484	C136	9	2.27e-05	Chang et al. 2016
CTNNB1	P35222	N387	6	2.31e-05	Chang et al. 2016
TP53	P04637	F109	16	2.37e-05	Chang et al. 2017
KIT	P10721	V560	7	2.52e-05	Chang et al. 2017
TP53	P04637	G105	28	2.56e-05	Chang et al. 2017
SMAD4	Q13485	E330	11	2.65e-05	Chang et al. 2017
ERBB2	P04626	D769	8	2.69e-05	Chang et al. 2016
TP53	P04637	T125	30	2.7e-05	Chang et al. 2017
MEF2A	Q02078	P99	7	2.91e-05	Chang et al. 2016
PTEN	P60484	G127	14	3.07e-05	Chang et al. 2017
STK11	Q15831	G242	9	3.43e-05	Chang et al. 2017
FGFR3	P22607	R248	9	3.55e-05	Chang et al. 2016
MYC	P01106	S161	11	3.62e-05	Chang et al. 2017
MYO18B	F5GYU7	P1018	9	3.67e-05	Chang et al. 2016
KRAS	P01116	L19	12	3.72e-05	Chang et al. 2017
PIK3CA	P42336	R115	11	3.87e-05	Chang et al. 2017
PREX2	Q70Z35	L50	9	4.17e-05	Chang et al. 2017
CDKN2A	P42771	E88	15	4.24e-05	Chang et al. 2016
HIST1H3C	P68431	K37	6	4.31e-05	Chang et al. 2017
COBL	O75128	E480	6	4.36e-05	Chang et al. 2016
ATM	Q13315	N2875	6	4.66e-05	Chang et al. 2016
RHOA	P61586	Y34	6	4.71e-05	Chang et al. 2017
ZHX3	Q9H4I2	N249	6	4.76e-05	Chang et al. 2016
SMARCA4	P51532	R1243	12	4.82e-05	Chang et al. 2017
RHOA	P61586	L57	6	5.07e-05	Chang et al. 2017
VHL	P40337	D121	9	5.25e-05	Chang et al. 2017
FBXW7	Q969H0	D520	11	5.42e-05	Chang et al. 2017
RUNX1	Q01196	R174	7	5.51e-05	Chang et al. 2017
VHL	P40337	W88	9	5.74e-05	Chang et al. 2017
PLCB3	Q01970	T909	5	5.76e-05	Chang et al. 2016
PTEN	P60484	G129	12	5.95e-05	Chang et al. 2017
TP53	P04637	P250	24	5.99e-05	Chang et al. 2017
CDKN2A	P42771	L130	8	6.03e-05	Chang et al. 2017
CDKN2A	P42771	Y129	9	6.03e-05	Chang et al. 2017
FRMD4B	Q9Y2L6	P368	7	6.05e-05	Chang et al. 2016
PCSK5	Q92824	W924	8	6.25e-05	Chang et al. 2016
KRAS	P01116	K117	9	6.6e-05	Chang et al. 2016
STK11	Q15831	Q220	10	6.69e-05	Chang et al. 2017
EGFR	P00533	H304	5	7.44e-05	Chang et al. 2017
EGFR	P00533	T363	7	7.44e-05	Chang et al. 2017
TP53	P04637	E271	53	7.5e-05	Chang et al. 2017
C3orf70	A6NLC5	S6	12	7.54e-05	Chang et al. 2016
CHD3	Q12873	I234	5	7.69e-05	Chang et al. 2016
VHL	P40337	S68	8	7.75e-05	Chang et al. 2017
RHOA	P61586	E40	14	7.89e-05	Chang et al. 2017
OVGP1	Q12889	S536	5	8.06e-05	Chang et al. 2016
VHL	P40337	L158	9	8.09e-05	Chang et al. 2017
VHL	P40337	P86	9	8.09e-05	Chang et al. 2017
VHL	P40337	V74	7	8.09e-05	Chang et al. 2017
DICER1	Q9UPY3	D1810	9	8.22e-05	Chang et al. 2017
PIK3CA	P42336	N107	6	8.25e-05	Chang et al. 2017
INMT	O95050	S212	9	8.3e-05	Chang et al. 2016
LAMC1	P11047	P641	6	9.33e-05	Chang et al. 2016
ASXL2	Q76L83	E330	10	9.42e-05	Chang et al. 2017
PAK7	Q9P286	M173	12	9.55e-05	Chang et al. 2017
MAP2K2	P36507	F57	6	9.7e-05	Chang et al. 2017
IRF4	Q15306	K123	3	9.97e-05	Chang et al. 2017
PNLIPRP3	Q17RR3	K431	6	0.0001	Chang et al. 2016
ERBB2	P04626	V777	5	0.0001	Chang et al. 2016
KAT8	Q9H7Z6	R98	8	0.0001	Chang et al. 2016
SF3B1	O75533	G742	6	0.0001	Chang et al. 2016
CTNNB1	P35222	H36	6	0.0001	Chang et al. 2016
NFE2L2	Q16236	R34	13	0.0001	Chang et al. 2016
SEMA4B	Q9NPR2	S226	6	0.0001	Chang et al. 2016
PPP6C	O00743	R301	14	0.0001	Chang et al. 2016
LCE1A	Q5T7P2	K28	5	0.0001	Chang et al. 2016
U2AF1	Q01081	Q157	4	0.0001	Chang et al. 2016
NFE2L2	Q16236	G31	8	0.0001	Chang et al. 2016
FGFR2	P21802	S252	12	0.0001	Chang et al. 2016
PIM1	P11309	S97	10	0.000100262	Chang et al. 2017
PBRM1	Q86U86	R710	11	0.000109398	Chang et al. 2017
RUNX1	Q01196	R135	4	0.000113108	Chang et al. 2017
B2M	P61769	L12	7	0.000115092	Chang et al. 2017
SUZ12	Q15022	R101	6	0.000127919	Chang et al. 2017
KEAP1	Q14145	R260	10	0.000128688	Chang et al. 2017
MTOR	P42345	C1483	7	0.000130996	Chang et al. 2017
EGFR	P00533	P596	8	0.000132911	Chang et al. 2017
EIF1AX	P47813	G15	7	0.00013328	Chang et al. 2017
MTOR	P42345	V2006	7	0.00014343	Chang et al. 2017
ERBB3	P21860	T355	6	0.000144623	Chang et al. 2017
NRAS	P01111	G60	7	0.000146135	Chang et al. 2017
XPO1	O14980	R749	11	0.000146532	Chang et al. 2017
NOTCH1	P46531	F853	4	0.00015082	Chang et al. 2017
EIF1AX	P47813	R13	12	0.000161842	Chang et al. 2017
PIM1	P11309	G28	8	0.00017151	Chang et al. 2017
SF3B1	O75533	G740	9	0.000175436	Chang et al. 2017
SPOP	O43791	F125	6	0.000178222	Chang et al. 2017
TP53	P04637	V172	18	0.000199169	Chang et al. 2017
FGFR2	P21802	C382	5	0.0002	Chang et al. 2016
FOXA1	P55317	I176	7	0.0002	Chang et al. 2016
STAT3	P40763	H410	5	0.0002	Chang et al. 2016
PTPN11	Q06124	E76	7	0.0002	Chang et al. 2016
PIK3CA	P42336	E81	13	0.0002	Chang et al. 2016
PIK3R1	P27986	K567	5	0.0002	Chang et al. 2016
TP53	P04637	F270	16	0.0002	Chang et al. 2016
SF3B1	O75533	K666	5	0.0002	Chang et al. 2016
KIAA0020	Q15397	K63	5	0.0002	Chang et al. 2016
U2AF1	Q01081	I24	4	0.0002	Chang et al. 2016
H3F3A	P84243	G35	6	0.0002	Chang et al. 2016
ALK	Q9UM73	R1275	12	0.0002	Chang et al. 2016
SLC4A11	Q8NBS3	V691	5	0.0002	Chang et al. 2016
ERBB2	P04626	G776	6	0.000214743	Chang et al. 2017
CTCF	P49711	H284	6	0.00021698	Chang et al. 2017
SMAD4	Q13485	E526	11	0.000220507	Chang et al. 2017
SMAD4	Q13485	D355	7	0.000220507	Chang et al. 2017
ERCC2	P18074	S246	7	0.000220631	Chang et al. 2017
IRF4	Q15306	C99	7	0.000227653	Chang et al. 2017
FGFR2	P21802	R203	6	0.000229895	Chang et al. 2017
STAT3	P40763	S614	5	0.000238844	Chang et al. 2017
CIC	Q96RK0	R201	7	0.00025673	Chang et al. 2017
PDGFRA	P16234	E229	7	0.000257939	Chang et al. 2017
FOXO1	Q12778	S22	7	0.000262159	Chang et al. 2017
ERBB2	P04626	V659	5	0.000268823	Chang et al. 2017
MAP2K1	Q02750	C121	6	0.000271001	Chang et al. 2017
TP53	P04637	T155	18	0.000276204	Chang et al. 2017
PTPRD	P23468	S431	17	0.000280826	Chang et al. 2017
DICER1	Q9UPY3	E1813	6	0.0003	Chang et al. 2016
WDR73	Q6P4I2	G316	5	0.0003	Chang et al. 2016
KLF5	Q13887	E419	7	0.0003	Chang et al. 2016
HSD11B1	P28845	G45	7	0.0003	Chang et al. 2016
TMEM131	Q92545	E1319	7	0.0003	Chang et al. 2016
HOOK2	Q96ED9	S630	6	0.0003	Chang et al. 2016
EHMT1	Q9H9B1	V280	5	0.0003	Chang et al. 2016
SMAD4	Q13485	D351	8	0.0003	Chang et al. 2016
EGFR	P00533	G719	7	0.0003	Chang et al. 2016
WDR52	Q96MT7	V1227	5	0.0003	Chang et al. 2016
CASP8	Q14790	R68	13	0.000302849	Chang et al. 2017
RNF43	Q68DV7	H86	4	0.000317636	Chang et al. 2017
BRAF	P15056	L485	6	0.000333434	Chang et al. 2017
BCL2	P10415	A131	10	0.000338355	Chang et al. 2017
CTNNB1	P35222	W383	6	0.000347387	Chang et al. 2017
PTEN	P60484	A126	11	0.000355422	Chang et al. 2017
PTEN	P60484	C105	7	0.00036399	Chang et al. 2017
TGFBR2	P37173	D446	12	0.000365084	Chang et al. 2017
PTEN	P60484	C124	8	0.00036946	Chang et al. 2017
PTPRT	O14522	L668	5	0.000383122	Chang et al. 2017
RAC1	P63000	N92	5	0.0003846	Chang et al. 2017
GATA2	P23769	C352	4	0.000386131	Chang et al. 2017
MAP2K1	Q02750	Y130	5	0.000390931	Chang et al. 2017
TP53	P04637	Q331	47	0.000393306	Chang et al. 2017
SPOP	O43791	Y87	5	0.0004	Chang et al. 2016
RBM39	Q14498	T353	5	0.0004	Chang et al. 2016
MYC	P01106	T73	5	0.0004	Chang et al. 2016
PCBP1	Q15365	L102	4	0.0004	Chang et al. 2016
TROAP	Q12815	S562	5	0.0004	Chang et al. 2016
PTPN11	Q06124	G507	7	0.0004	Chang et al. 2016
NFE2L2	Q16236	D77	7	0.000440113	Chang et al. 2017
EGFR	P00533	T263	4	0.000443937	Chang et al. 2017
MTOR	P42345	M2327	6	0.000446236	Chang et al. 2017
DNMT1	P26358	E51	5	0.000457369	Chang et al. 2017
SETD2	Q9BYW2	Y1666	6	0.000460067	Chang et al. 2017
RHOA	P61586	G62	7	0.000460204	Chang et al. 2017
BRAF	P15056	G596	8	0.000495017	Chang et al. 2017
EP300	Q09472	C1164	6	0.000497503	Chang et al. 2017
TP53	P04637	G244	26	0.0005	Chang et al. 2016
ARID3A	Q99856	S557	4	0.0005	Chang et al. 2016
ACVR1	Q04771	R258	5	0.0005	Chang et al. 2016
PIK3CA	P42336	V344	11	0.0005	Chang et al. 2016
PTEN	P60484	R335	14	0.000501374	Chang et al. 2017
FGFR2	P21802	Y375	5	0.000502673	Chang et al. 2017
MST1	G3XAK1	G673	6	0.000504583	Chang et al. 2017
MAP3K1	Q13233	S1330	10	0.000515914	Chang et al. 2017
FOXA1	P55317	S250	6	0.000517134	Chang et al. 2017
SMAD4	Q13485	W524	9	0.000523514	Chang et al. 2017
TP53	P04637	L257	17	0.000534068	Chang et al. 2017
VHL	P40337	R161	10	0.000554685	Chang et al. 2017
KEAP1	Q14145	R470	10	0.000575238	Chang et al. 2017
ARAF	P10398	P216	4	0.000593516	Chang et al. 2017
CYP4A11	Q02928	I491	4	0.0006	Chang et al. 2016
RARA	P10276	F286	4	0.0006	Chang et al. 2016
RQCD1	Q92600	S87	6	0.0006	Chang et al. 2016
CCND1	P24385	P287	6	0.0006	Chang et al. 2016
ARAF	P10398	S214	6	0.0006	Chang et al. 2016
ABCC10	Q5T3U5	R570	8	0.0006	Chang et al. 2016
MAX	P61244	R60	9	0.0006	Chang et al. 2016
FRMD6	Q96NE9	S17	5	0.0006	Chang et al. 2016
SMARCA4	P51532	G1232	9	0.0006	Chang et al. 2016
GNAQ	P50148	R183	10	0.000622969	Chang et al. 2017
EP300	Q09472	H1451	5	0.000628378	Chang et al. 2017
PTEN	P60484	G165	12	0.000639515	Chang et al. 2017
RHOA	P61586	T37	6	0.000650689	Chang et al. 2017
SMAD4	Q13485	C363	6	0.000651642	Chang et al. 2017
RAC1	P63000	G12	6	0.0006614	Chang et al. 2017
NCR1	O76036	E42	8	0.0007	Chang et al. 2016
MYO9A	B2RTY4	P1300	7	0.0007	Chang et al. 2016
CELSR1	Q9NYQ6	W1958	5	0.0007	Chang et al. 2016
LRP5	O75197	S1609	5	0.0007	Chang et al. 2016
FOXO1	Q12778	S205	5	0.00070081	Chang et al. 2017
KRAS	P01116	A11	8	0.000725139	Chang et al. 2017
CIC	Q96RK0	S231	4	0.000799846	Chang et al. 2017
PIK3CA	P42336	N1044	6	0.0008	Chang et al. 2016
CYP2C8	P10632	P402	9	0.0008	Chang et al. 2016
HIST1H3C	P68431	K37	5	0.0008	Chang et al. 2016
CDK4	P11802	K22	4	0.0008	Chang et al. 2016
FAT1	Q14517	R1627	12	0.000802594	Chang et al. 2017
SOCS1	O15524	A3	6	0.000842047	Chang et al. 2017
AKT1	P31749	Q79	6	0.000879322	Chang et al. 2017
PTEN	P60484	Q171	16	0.000888705	Chang et al. 2017
VHL	P40337	I151	6	0.000898334	Chang et al. 2017
TP53	P04637	N239	15	0.0009	Chang et al. 2016
CRB1	P82279	F630	6	0.0009	Chang et al. 2016
EBF2	Q9HAK2	G444	9	0.0009	Chang et al. 2016
AMPD1	P23109	L631	5	0.0009	Chang et al. 2016
U2AF1	Q01081	I24	5	0.000965908	Chang et al. 2017
BCL2	P10415	K22	10	0.00096647	Chang et al. 2017
PIK3CA	P42336	M1004	9	0.000967542	Chang et al. 2017
ASXL2	Q76L83	M1	6	0.000968287	Chang et al. 2017
ALK	Q9UM73	F1245	3	0.000975062	Chang et al. 2017
CIZ1	Q9ULV3	L59	4	0.001	Chang et al. 2016
PASD1	Q8IV76	M338	5	0.001	Chang et al. 2016
TUBGCP4	Q9UGJ1	A8	5	0.001	Chang et al. 2016
TP53	P04637	I255	13	0.001	Chang et al. 2016
PTEN	P60484	Y155	5	0.00100345	Chang et al. 2017
FBXW7	Q969H0	R224	10	0.00102351	Chang et al. 2017
TP53	P04637	N131	13	0.00103632	Chang et al. 2017
TP53	P04637	L265	19	0.00103632	Chang et al. 2017
CUL3	Q13618	M299	5	0.00104496	Chang et al. 2017
TP53	P04637	Q192	45	0.0010669	Chang et al. 2017
CHEK2	O96017	R346	8	0.00106947	Chang et al. 2017
TP53	P04637	E286	33	0.0011	Chang et al. 2016
IL7R	P16871	K395	8	0.0011	Chang et al. 2016
SSBP3	Q9BWW4	K6	4	0.0011	Chang et al. 2016
PIK3CA	P42336	E39	6	0.00110112	Chang et al. 2017
STK11	Q15831	H174	6	0.00114521	Chang et al. 2017
EGFR	P00533	A750	4	0.00114854	Chang et al. 2017
FBXW7	Q969H0	T532	3	0.00116715	Chang et al. 2017
CREBBP	Q92793	D1435	9	0.001175	Chang et al. 2017
SLCO1B7	G3V0H7	E27	9	0.0012	Chang et al. 2016
SRSF2	Q01130	P95	6	0.00121973	Chang et al. 2017
VHL	P40337	C162	8	0.00122944	Chang et al. 2017
PCMTD1	Q96MG8	P342	8	0.0013	Chang et al. 2016
TGFBR2	P37173	R528	10	0.0013	Chang et al. 2016
BCL2L12	Q9HB09	R18	7	0.0013	Chang et al. 2016
ACVR1	Q04771	G328	6	0.0013	Chang et al. 2016
CARD11	Q9BXL7	K215	5	0.00131617	Chang et al. 2017
DIS3	Q9Y2L1	R780	6	0.00133003	Chang et al. 2017
PDPK1	O15530	P499	5	0.00133637	Chang et al. 2017
ARID1A	O14497	R1461	10	0.00133954	Chang et al. 2017
PIK3CA	P42336	C604	5	0.00134822	Chang et al. 2017
FOXA1	P55317	Y259	5	0.00135085	Chang et al. 2017
VPS37B	Q9H9H4	Y191	4	0.0014	Chang et al. 2016
VHL	P40337	N78	6	0.0014	Chang et al. 2016
TRIM65	Q6PJ69	H383	4	0.0014	Chang et al. 2016
C16orf80	Q9Y6A4	R100	7	0.0014	Chang et al. 2016
MTOR	P42345	C1483	5	0.0015	Chang et al. 2016
BTBD11	A6QL63	K1003	5	0.0015	Chang et al. 2016
S100A8	P05109	K49	5	0.0015	Chang et al. 2016
DDX28	Q9NUL7	S442	5	0.0015	Chang et al. 2016
SLC16A13	Q7RTY0	F158	4	0.0016	Chang et al. 2016
TP53	P04637	S215	15	0.0016	Chang et al. 2016
ZNF623	O75123	T500	5	0.0016	Chang et al. 2016
STK11	Q15831	N181	4	0.00160517	Chang et al. 2017
PTEN	P60484	M35	8	0.0016887	Chang et al. 2017
PIK3CA	P42336	G106	8	0.0017	Chang et al. 2016
TPSD1	Q9BZJ3	P22	9	0.0017	Chang et al. 2016
UCHL1	P09936	H161	5	0.0017	Chang et al. 2016
INTS12	Q96CB8	M1	4	0.0017	Chang et al. 2016
MYC	P01106	T73	6	0.00170415	Chang et al. 2017
CDH1	P12830	D288	5	0.0017736	Chang et al. 2017
UBXN11	Q5T124	S494	4	0.0018	Chang et al. 2016
PIK3CA	P42336	C378	6	0.0018	Chang et al. 2016
SPOP	O43791	F102	5	0.0018	Chang et al. 2016
DNMT3B	Q9UBC3	V229	7	0.0018413	Chang et al. 2017
ERCC2	P18074	Y14	3	0.00185832	Chang et al. 2017
FOXP1	Q9H334	R514	9	0.00189104	Chang et al. 2017
NFIC	P08651	S339	4	0.0019	Chang et al. 2016
KRAS	P01116	Q22	6	0.00191302	Chang et al. 2017
RICTOR	Q6R327	S1101	10	0.00198059	Chang et al. 2017
MICA	Q96QC4	I236	4	0.002	Chang et al. 2016
FBXW7	Q969H0	R658	14	0.002	Chang et al. 2016
CLECL1	Q8IZS7	Y50	4	0.002	Chang et al. 2016
XPO6	Q96QU8	I274	4	0.002	Chang et al. 2016
PODXL	O00592	S22	4	0.002	Chang et al. 2016
PTPRT	O14522	L695	9	0.00202693	Chang et al. 2017
TP53	P04637	G262	17	0.00203377	Chang et al. 2017
EIF1AX	P47813	G6	7	0.00204928	Chang et al. 2017
PTEN	P60484	S170	8	0.00205793	Chang et al. 2017
FOXA1	P55317	S242	5	0.00206253	Chang et al. 2017
TP53	P04637	F113	17	0.00211656	Chang et al. 2017
RAD50	Q92878	D69	6	0.0021273	Chang et al. 2017
GNAS	P63092	R160	9	0.00218412	Chang et al. 2017
TSC22D2	O75157	S735	6	0.0022	Chang et al. 2016
FGFR4	P22455	N535	3	0.00224498	Chang et al. 2017
PPP6C	O00743	S270	7	0.00226807	Chang et al. 2017
PIK3CA	P42336	P471	7	0.00229108	Chang et al. 2017
KIF26B	Q2KJY2	R2024	8	0.0023	Chang et al. 2016
CREBBP	Q92793	Y1450	5	0.00236926	Chang et al. 2017
TP53	P04637	T125	47	0.0024	Chang et al. 2016
S100A3	P33764	P97	5	0.0024	Chang et al. 2016
KMT2D	O14686	L1375	3	0.00240633	Chang et al. 2017
ERCC2	P18074	P463	6	0.00240751	Chang et al. 2017
CYSLTR2	Q9NS75	L129	3	0.00248881	Chang et al. 2017
TMEM200C	A6NKL6	R19	7	0.0025	Chang et al. 2016
IL7R	P16871	I241	5	0.00254943	Chang et al. 2017
SMARCA4	P51532	R1135	9	0.00257749	Chang et al. 2017
SWI5	Q1ZZU3	P34	7	0.0026	Chang et al. 2016
CSPG5	O95196	R365	6	0.0026	Chang et al. 2016
KEAP1	Q14145	G480	9	0.00262222	Chang et al. 2017
METTL14	Q9HCE5	R298	8	0.0027	Chang et al. 2016
VHL	P40337	G114	7	0.00271531	Chang et al. 2017
MAP3K1	Q13233	L380	3	0.00275841	Chang et al. 2017
PDGFRA	P16234	N659	6	0.0027827	Chang et al. 2017
ERCC2	P18074	E606	6	0.0028127	Chang et al. 2017
ERCC2	P18074	D609	3	0.0028127	Chang et al. 2017
PIK3CA	P42336	D939	4	0.00289243	Chang et al. 2017
PANK3	Q9H999	I301	4	0.0029	Chang et al. 2016
ARID2	Q68CP9	S297	8	0.0029	Chang et al. 2016
TP53	P04637	L111	12	0.0029	Chang et al. 2016
MAP2K1	Q02750	Q56	5	0.00292307	Chang et al. 2017
CDH1	P12830	R335	7	0.00296597	Chang et al. 2017
MYT1L	Q9UL68	K203	4	0.003	Chang et al. 2016
RSBN1L	Q6PCB5	L432	4	0.003	Chang et al. 2016
TMEM147	Q9BVK8	A92	5	0.003	Chang et al. 2016
CIC	Q96RK0	N205	3	0.00300209	Chang et al. 2017
EGFR	P00533	R108	8	0.0031	Chang et al. 2016
SOX17	Q9H6I2	A96	4	0.00310588	Chang et al. 2017
SMAD4	Q13485	L536	4	0.00311074	Chang et al. 2017
PIK3CA	P42336	T1052	5	0.00312237	Chang et al. 2017
SMAD4	Q13485	D537	9	0.0033	Chang et al. 2016
PTEN	P60484	Y178	5	0.0033597	Chang et al. 2017
KEAP1	Q14145	M110	6	0.0033807	Chang et al. 2017
KEAP1	Q14145	R272	8	0.0033807	Chang et al. 2017
PSG4	Q00888	E263	7	0.0034	Chang et al. 2016
PDHA1	P08559	G107	5	0.0035	Chang et al. 2016
LSM14A	Q8ND56	R272	8	0.0035	Chang et al. 2016
GATA3	P23771	R364	5	0.00354741	Chang et al. 2017
THRA	P10827	R79	7	0.0036	Chang et al. 2016
JUN	P05412	E112	7	0.00366249	Chang et al. 2017
CTCF	P49711	S354	10	0.00367326	Chang et al. 2017
ASF1B	Q9NVP2	P21	5	0.0038	Chang et al. 2016
ALK	Q9UM73	R401	11	0.00380995	Chang et al. 2017
ARID2	Q68CP9	R314	9	0.00383083	Chang et al. 2017
MED12	Q93074	V1223	3	0.00387331	Chang et al. 2017
MAX	P61244	H28	4	0.004	Chang et al. 2016
KLF4	O43474	K443	7	0.00402158	Chang et al. 2017
STK11	Q15831	E165	9	0.00404179	Chang et al. 2017
AKT3	Q9Y243	E17	10	0.00407836	Chang et al. 2017
CARD11	Q9BXL7	L251	3	0.00409188	Chang et al. 2017
STK11	Q15831	P221	8	0.00419616	Chang et al. 2017
UBE2D3	P61077	M30	4	0.0042	Chang et al. 2016
TP53	P04637	L111	18	0.0042015	Chang et al. 2017
TBX2	Q13207	S192	4	0.0043	Chang et al. 2016
ANKZF1	Q9H8Y5	A650	5	0.0043	Chang et al. 2016
PIK3CA	P42336	R38	14	0.0044	Chang et al. 2016
ELTD1	Q9HBW9	S11	9	0.0044	Chang et al. 2016
RPL10L	Q96L21	K156	5	0.0044	Chang et al. 2016
TP53	P04637	Q104	23	0.00440345	Chang et al. 2017
RHOA	P61586	R5	10	0.0045	Chang et al. 2016
RHOA	P61586	E40	8	0.0045	Chang et al. 2016
PCED1B	Q96HM7	S343	8	0.0045	Chang et al. 2016
MTOR	P42345	I2500	4	0.0045	Chang et al. 2016
SESN2	P58004	I425	2	0.00451586	Chang et al. 2017
MYC	P01106	S161	6	0.0046	Chang et al. 2016
MAP2K4	P45985	S184	9	0.00461638	Chang et al. 2017
DNAH9	Q9NYC9	E2368	8	0.0047	Chang et al. 2016
NOL4	O94818	L423	5	0.0047	Chang et al. 2016
SMARCA4	P51532	R973	10	0.00471444	Chang et al. 2017
KCNQ5	Q9NR82	G273	8	0.0049	Chang et al. 2016
CHST12	Q9NRB3	V12	4	0.0049	Chang et al. 2016
ERBB2	P04626	G660	5	0.0049302	Chang et al. 2017
NCOA3	Q9Y6Q9	R80	3	0.00503088	Chang et al. 2017
FOXA1	P55317	D226	9	0.00504815	Chang et al. 2017
ZNF516	Q92618	A256	5	0.0051	Chang et al. 2016
PIK3R1	P27986	K379	4	0.00512804	Chang et al. 2017
RINT1	Q6NUQ1	K85	4	0.0052	Chang et al. 2016
CR1	E9PDY4	R1842	9	0.0052	Chang et al. 2016
TGFBRAP1	Q8WUH2	P824	6	0.0052	Chang et al. 2016
ERBB2	P04626	R103	6	0.00522898	Chang et al. 2017
PIM1	P11309	K24	7	0.00528608	Chang et al. 2017
TOP2B	Q02880	R656	7	0.0053	Chang et al. 2016
PACS2	E9PB38	Q87	4	0.0053	Chang et al. 2016
PTEN	P60484	D24	10	0.00530937	Chang et al. 2017
TP53	P04637	Q144	15	0.0054	Chang et al. 2016
ZNF649	Q9BS31	R198	7	0.0054	Chang et al. 2016
KRAS	P01116	D33	4	0.00545511	Chang et al. 2017
ATP6V1B2	P21281	P352	5	0.0056	Chang et al. 2016
TACC3	Q9Y6A5	P417	6	0.0056	Chang et al. 2016
PTEN	P60484	P38	11	0.00565129	Chang et al. 2017
AXL	P30530	A273	4	0.005756	Chang et al. 2017
KCNJ8	Q15842	G417	7	0.0058	Chang et al. 2016
KDR	P35968	S1037	11	0.00584924	Chang et al. 2017
KDR	P35968	R1032	12	0.00584924	Chang et al. 2017
TP53	P04637	D281	30	0.0059	Chang et al. 2016
TP53	P04637	D259	31	0.00592808	Chang et al. 2017
GNA11	P29992	R183	7	0.0059591	Chang et al. 2017
ARHGAP28	Q9P2N2	L436	5	0.0061	Chang et al. 2016
MEF2A	Q02078	Y105	4	0.0061	Chang et al. 2016
TCF20	Q9UGU0	P815	6	0.0061	Chang et al. 2016
CDKN2A	P42771	P48	12	0.00610554	Chang et al. 2017
BRAF	P15056	L597	4	0.0062	Chang et al. 2016
CANT1	Q8WVQ1	K131	4	0.0062	Chang et al. 2016
DIS3	Q9Y2L1	D479	5	0.00626224	Chang et al. 2017
ACP6	Q9NPH0	V29	4	0.0063	Chang et al. 2016
LCE1F	Q5T754	P27	10	0.0063	Chang et al. 2016
PIK3CA	P42336	H1065	5	0.00632322	Chang et al. 2017
MAGEC1	O60732	K1046	6	0.0064	Chang et al. 2016
BRAF	P15056	G596	5	0.0065	Chang et al. 2016
PIK3R1	P27986	D560	8	0.00650809	Chang et al. 2017
TP63	Q9H3D4	E609	11	0.00654116	Chang et al. 2017
TP53	P04637	I251	15	0.0065547	Chang et al. 2017
PIK3CA	P42336	G364	6	0.00666202	Chang et al. 2017
CDKN2A	P42771	N42	5	0.00666274	Chang et al. 2017
DIS3	Q9Y2L1	R382	9	0.00674087	Chang et al. 2017
DIS3	Q9Y2L1	R689	9	0.00674087	Chang et al. 2017
DIS3	Q9Y2L1	L767	4	0.00674087	Chang et al. 2017
HIST1H3B	P68431	E51	12	0.00676671	Chang et al. 2017
PTEN	P60484	Y16	5	0.00677821	Chang et al. 2017
GLI1	P08151	R380	8	0.00678357	Chang et al. 2017
PIK3CB	P42338	D1067	5	0.0068	Chang et al. 2016
CEP63	Q96MT8	S153	9	0.0068	Chang et al. 2016
ATM	Q13315	L2890	5	0.00687296	Chang et al. 2017
JAK1	P23458	L910	3	0.00697987	Chang et al. 2017
CDKN2A	P42771	L130	6	0.007	Chang et al. 2016
C6	P13671	K817	6	0.0071	Chang et al. 2016
EGFR	P00533	L838	3	0.00715263	Chang et al. 2017
RAC1	P63000	Q61	4	0.00720141	Chang et al. 2017
EIF1AX	P47813	P2	7	0.00725427	Chang et al. 2017
MED28	Q9H204	G7	4	0.0073	Chang et al. 2016
CASP8	Q14790	R432	10	0.00730592	Chang et al. 2017
VHL	P40337	H115	7	0.00743192	Chang et al. 2017
MAP2K4	P45985	R134	11	0.00744286	Chang et al. 2017
BCL6	P41182	R618	7	0.00748624	Chang et al. 2017
PROCR	Q9UNN8	R98	8	0.0075	Chang et al. 2016
ERBB2	P04626	D277	8	0.00753449	Chang et al. 2017
PTEN	P60484	Y177	5	0.00758645	Chang et al. 2017
PTEN	P60484	Y346	6	0.00758645	Chang et al. 2017
B2M	P61769	L7	5	0.00770415	Chang et al. 2017
FBXW7	Q969H0	E287	7	0.00774127	Chang et al. 2017
MARCH10	Q8NA82	G241	6	0.0078	Chang et al. 2016
RTKN2	Q8IZC4	R33	10	0.008	Chang et al. 2016
FZD10	Q9ULW2	S22	5	0.008	Chang et al. 2016
EP300	Q09472	H1451	4	0.008	Chang et al. 2016
FOXL2	P58012	E118	7	0.00808299	Chang et al. 2017
THSD7B	Q9C0I4	G557	8	0.0081	Chang et al. 2016
THSD7B	Q9C0I4	E1181	9	0.0081	Chang et al. 2016
SHROOM1	Q2M3G4	P300	4	0.0081	Chang et al. 2016
ERBB3	P21860	M60	4	0.0083	Chang et al. 2016
EGFR	P00533	K754	3	0.00841608	Chang et al. 2017
TP63	Q9H3D4	S365	12	0.00847836	Chang et al. 2017
EPHB1	P54762	R743	9	0.00851534	Chang et al. 2017
CLEC14A	Q86T13	R193	10	0.0086	Chang et al. 2016
CEP89	Q96ST8	S153	4	0.0086	Chang et al. 2016
EYA4	O95677	L152	7	0.0086	Chang et al. 2016
PTPN11	Q06124	F285	4	0.00866741	Chang et al. 2017
PTPN11	Q06124	N308	3	0.00866741	Chang et al. 2017
PIK3CA	P42336	C90	4	0.00868121	Chang et al. 2017
SF3B1	O75533	D894	6	0.00868423	Chang et al. 2017
SHB	Q15464	A460	4	0.0087	Chang et al. 2016
APOBR	Q0VD83	E352	5	0.0088	Chang et al. 2016
RB1	P06400	R787	11	0.00888303	Chang et al. 2017
SDHA	P31040	V644	7	0.00891411	Chang et al. 2017
SF3B1	O75533	D894	5	0.009	Chang et al. 2016
RIPPLY2	Q5TAB7	S110	6	0.009	Chang et al. 2016
TCEB1	Q15369	Y79	4	0.009	Chang et al. 2016
PIM1	P11309	Q37	5	0.00912236	Chang et al. 2017
KCNJ12	Q14500	E430	6	0.0092	Chang et al. 2016
NAP1L3	Q99457	K502	6	0.0093	Chang et al. 2016
CIC	Q96RK0	W238	3	0.00939319	Chang et al. 2017
RIT1	Q92963	M90	11	0.00949363	Chang et al. 2017
CYP7B1	O75881	K332	5	0.0096	Chang et al. 2016
ERBB2	P04626	T862	4	0.00960996	Chang et al. 2017
SMAD4	Q13485	D493	7	0.00966195	Chang et al. 2017
MTOR	P42345	A1971	6	0.00966714	Chang et al. 2017
MAGI2	Q86UL8	L603	5	0.0098	Chang et al. 2016
DHRS4	Q9BTZ2	T102	6	0.0098	Chang et al. 2016
NHS	Q6T4R5	L215	4	0.0098	Chang et al. 2016
PTEN	P60484	C71	7	0.010044	Chang et al. 2017
PTEN	P60484	W111	9	0.010044	Chang et al. 2017
TNFRSF14	Q92956	M1	4	0.0100656	Chang et al. 2017
HIST1H3B	P68431	E106	14	0.0101928	Chang et al. 2017
EGFR	P00533	L833	5	0.0101972	Chang et al. 2017
FOXO1	Q12778	T24	3	0.0102244	Chang et al. 2017
CDKN2A	P42771	S12	12	0.0102315	Chang et al. 2017
CREBBP	Q92793	W1502	6	0.0102806	Chang et al. 2017
ERBB3	P21860	F219	5	0.010341	Chang et al. 2017
CTNNB1	P35222	K292	4	0.0105287	Chang et al. 2017
FOXP1	Q9H334	S448	10	0.0106174	Chang et al. 2017
MTOR	P42345	L1460	4	0.0109745	Chang et al. 2017
KDM6A	O15550	G526	4	0.0113278	Chang et al. 2017
ATM	Q13315	R1466	9	0.011401	Chang et al. 2017
CARD11	Q9BXL7	D357	4	0.0114333	Chang et al. 2017
PRDM14	Q9GZV8	F204	6	0.0115138	Chang et al. 2017
IGF1R	P08069	G129	3	0.0115248	Chang et al. 2017
ERBB4	Q15303	K1223	6	0.0116021	Chang et al. 2017
ERBB4	Q15303	K1002	6	0.0116021	Chang et al. 2017
SMO	Q99835	W535	3	0.0116504	Chang et al. 2017
RARA	P10276	F286	4	0.0121888	Chang et al. 2017
FBXW7	Q969H0	R14	9	0.0122075	Chang et al. 2017
FBXW7	Q969H0	G437	6	0.0122075	Chang et al. 2017
TP53	P04637	D208	12	0.0123251	Chang et al. 2017
PIK3CA	P42336	P539	6	0.0127677	Chang et al. 2017
DICER1	Q9UPY3	D1709	10	0.0129765	Chang et al. 2017
CRLF2	Q9HC73	S128	7	0.0130681	Chang et al. 2017
RIT1	Q92963	F82	4	0.0131233	Chang et al. 2017
MYD88	Q99836	M219	3	0.0134688	Chang et al. 2017
PIK3R1	P27986	Y452	4	0.0137525	Chang et al. 2017
KEAP1	Q14145	G333	7	0.0137808	Chang et al. 2017
BCL2	P10415	G33	6	0.0137912	Chang et al. 2017
RBM10	P98175	R230	8	0.0140587	Chang et al. 2017
GATA3	P23771	R366	5	0.0141726	Chang et al. 2017
TP53	P04637	N247	15	0.0141746	Chang et al. 2017
TP53	P04637	R181	26	0.0141746	Chang et al. 2017
RHOA	P61586	L22	5	0.0143876	Chang et al. 2017
STK11	Q15831	P179	7	0.0144152	Chang et al. 2017
PTEN	P60484	L140	4	0.0146529	Chang et al. 2017
STAT3	P40763	F384	4	0.0148843	Chang et al. 2017
TP53	P04637	Y107	15	0.0149796	Chang et al. 2017
STAT3	P40763	D661	5	0.0151719	Chang et al. 2017
KNSTRN	Q9Y448	P28	5	0.0151834	Chang et al. 2017
EIF1AX	P47813	K10	4	0.0159903	Chang et al. 2017
ERBB3	P21860	M60	4	0.0162084	Chang et al. 2017
TGFBR2	P37173	E519	5	0.0162667	Chang et al. 2017
KMT2D	O14686	R5432	8	0.0163159	Chang et al. 2017
KEAP1	Q14145	G417	7	0.0163932	Chang et al. 2017
MYC	P01106	V7	4	0.0166441	Chang et al. 2017
CREBBP	Q92793	L1499	4	0.0171122	Chang et al. 2017
TRAF7	Q6Q0C0	N520	4	0.0171381	Chang et al. 2017
CARD11	Q9BXL7	D401	3	0.017237	Chang et al. 2017
TP53	P04637	K120	9	0.0176054	Chang et al. 2017
MYD88	Q99836	P153	4	0.0177533	Chang et al. 2017
PIK3CD	O00329	C416	2	0.0177653	Chang et al. 2017
GNAQ	P50148	G48	3	0.0178075	Chang et al. 2017
ATM	Q13315	I2888	4	0.0178317	Chang et al. 2017
PTEN	P60484	H61	6	0.0179438	Chang et al. 2017
CARD11	Q9BXL7	E93	4	0.0182331	Chang et al. 2017
TP53	P04637	I254	13	0.0184453	Chang et al. 2017
ERBB3	P21860	R103	5	0.0184875	Chang et al. 2017
CDH1	P12830	R63	8	0.0187372	Chang et al. 2017
PIK3CA	P42336	E970	9	0.0189638	Chang et al. 2017
EP300	Q09472	Q1455	6	0.0189801	Chang et al. 2017
HNF1A	P20823	S591	3	0.0197332	Chang et al. 2017
AKT1	P31749	D323	5	0.0198991	Chang et al. 2017
FBXW7	Q969H0	S546	9	0.0203094	Chang et al. 2017
ERBB2	P04626	R138	3	0.0204568	Chang et al. 2017
ANKRD11	Q6UB99	K369	5	0.0204755	Chang et al. 2017
MTOR	P42345	A1459	6	0.0209022	Chang et al. 2017
GTF2I	P78347	F641	4	0.0209524	Chang et al. 2017
TGFBR1	P36897	T375	3	0.0210048	Chang et al. 2017
PIK3CB	P42338	R321	9	0.0210358	Chang et al. 2017
ERRFI1	Q9UJM3	K409	3	0.0212232	Chang et al. 2017
INPPL1	O15357	R70	4	0.022295	Chang et al. 2017
ARID1B	Q8NFD5	G953	4	0.0223083	Chang et al. 2017
ERBB2	P04626	T733	4	0.0223243	Chang et al. 2017
CBFB	Q13951	M1	4	0.0223684	Chang et al. 2017
ETV6	P41212	R369	9	0.0227397	Chang et al. 2017
NF1	P21359	R461	9	0.0230323	Chang et al. 2017
PTPN11	Q06124	T472	7	0.0231427	Chang et al. 2017
EIF1AX	P47813	N4	4	0.0232128	Chang et al. 2017
CDK12	Q9NYV4	R890	5	0.0234944	Chang et al. 2017
PTEN	P60484	L247	4	0.0240582	Chang et al. 2017
CTLA4	P16410	T17	5	0.0243722	Chang et al. 2017
BCL10	O95999	N173	2	0.0244964	Chang et al. 2017
SMO	Q99835	V414	3	0.0245405	Chang et al. 2017
LYN	P07948	I364	2	0.0246337	Chang et al. 2017
MET	P08581	H1094	4	0.0248979	Chang et al. 2017
CTNNB1	P35222	R535	7	0.0258178	Chang et al. 2017
TP53	P04637	I232	14	0.0262979	Chang et al. 2017
SMARCD1	Q96GM5	R183	7	0.0268785	Chang et al. 2017
PIM1	P11309	L2	6	0.0269741	Chang et al. 2017
FOXA1	P55317	R219	8	0.0270601	Chang et al. 2017
IL7R	P16871	R206	9	0.0272339	Chang et al. 2017
PIM1	P11309	E79	6	0.0274182	Chang et al. 2017
RAC1	P63000	P34	5	0.0277543	Chang et al. 2017
DICER1	Q9UPY3	S1344	7	0.0280567	Chang et al. 2017
NOTCH1	P46531	R365	8	0.0280925	Chang et al. 2017
CDKN2A	P42771	D74	8	0.0289475	Chang et al. 2017
DNMT1	P26358	E432	7	0.0293011	Chang et al. 2017
MET	P08581	Y1003	3	0.029656	Chang et al. 2017
KEAP1	Q14145	V155	5	0.0299449	Chang et al. 2017
STK11	Q15831	W239	5	0.0302868	Chang et al. 2017
EPAS1	Q99814	Y532	2	0.0308917	Chang et al. 2017
POLE	Q07864	E18	7	0.0316821	Chang et al. 2017
CARD11	Q9BXL7	R337	5	0.0317185	Chang et al. 2017
CARD11	Q9BXL7	E626	6	0.0317185	Chang et al. 2017
PTPN11	Q06124	D61	4	0.0318524	Chang et al. 2017
PTPN11	Q06124	T511	3	0.0318524	Chang et al. 2017
NOTCH1	P46531	G310	7	0.0322228	Chang et al. 2017
NOTCH1	P46531	C440	5	0.0322228	Chang et al. 2017
ERBB3	P21860	R475	8	0.0325525	Chang et al. 2017
SMAD3	P84022	R287	8	0.0327038	Chang et al. 2017
SMAD3	P84022	R268	11	0.0327038	Chang et al. 2017
HNF1A	P20823	I27	4	0.0328297	Chang et al. 2017
PRDM14	Q9GZV8	R505	6	0.0330882	Chang et al. 2017
CDKN1B	P46527	G72	6	0.0331705	Chang et al. 2017
ETV6	P41212	S284	6	0.0332331	Chang et al. 2017
SMARCA4	P51532	E821	8	0.0348588	Chang et al. 2017
ALK	Q9UM73	R395	7	0.0351246	Chang et al. 2017
NOTCH1	P46531	E455	7	0.0354105	Chang et al. 2017
TP53	P04637	Q165	16	0.035559	Chang et al. 2017
PIK3CA	P42336	R357	7	0.0361888	Chang et al. 2017
STK11	Q15831	G251	6	0.0363128	Chang et al. 2017
ARID1B	Q8NFD5	Q1166	5	0.0366276	Chang et al. 2017
RPTOR	Q8N122	R139	8	0.0367985	Chang et al. 2017
SF3B1	O75533	Y623	4	0.0377724	Chang et al. 2017
BRCA2	P51587	S2303	5	0.0384536	Chang et al. 2017
PTPRT	O14522	R364	12	0.0388462	Chang et al. 2017
SETD2	Q9BYW2	H1603	5	0.0393591	Chang et al. 2017
MAX	P61244	R36	2	0.0398857	Chang et al. 2017
RB1	P06400	Y606	4	0.0407819	Chang et al. 2017
SMARCB1	Q12824	R374	8	0.0409235	Chang et al. 2017
BCL10	O95999	E178	3	0.041629	Chang et al. 2017
TGFBR1	P36897	R487	8	0.0420026	Chang et al. 2017
PTPN11	Q06124	A465	5	0.0426694	Chang et al. 2017
PTEN	P60484	G251	6	0.0430196	Chang et al. 2017
PTEN	P60484	T277	6	0.0430196	Chang et al. 2017
FGFR2	P21802	F276	3	0.0435896	Chang et al. 2017
NSD1	Q96L73	C1710	3	0.0438692	Chang et al. 2017
SMAD4	Q13485	A118	11	0.0442846	Chang et al. 2017
CTCF	P49711	H288	3	0.044498	Chang et al. 2017
VHL	P40337	L169	5	0.0448754	Chang et al. 2017
KNSTRN	Q9Y448	C22	4	0.0449961	Chang et al. 2017
PPP2R1A	P30153	R182	7	0.0450905	Chang et al. 2017
SMAD4	Q13485	Y95	4	0.0453956	Chang et al. 2017
SMAD4	Q13485	Y353	4	0.0453956	Chang et al. 2017
TCF3	P15923-2	N551	2	0.0459435	Chang et al. 2017
RPS6KA4	O75676	S236	6	0.0462995	Chang et al. 2017
RPS6KA4	O75676	R629	7	0.0462995	Chang et al. 2017
PTEN	P60484	L320	4	0.0469972	Chang et al. 2017
CREBBP	Q92793	W1472	6	0.0475078	Chang et al. 2017
CREBBP	Q92793	Y1482	4	0.0475078	Chang et al. 2017
FH	P07954	M336	2	0.0475803	Chang et al. 2017
EIF1AX	P47813	G8	6	0.0479491	Chang et al. 2017
RAD52	P43351	R396	2	0.0481337	Chang et al. 2017
VHL	P40337	L135	4	0.0482434	Chang et al. 2017
HNF1A	P20823	R114	5	0.0496263	Chang et al. 2017
HGF	P14210	G229	3	0.0500918	Chang et al. 2017
HNF1A	P20823	G338	4	0.0514682	Chang et al. 2017
TP53	P04637	P190	17	0.051799	Chang et al. 2017
KEAP1	Q14145	R320	8	0.0522548	Chang et al. 2017
FBXW7	Q969H0	R441	7	0.052852	Chang et al. 2017
CDKN1A	P38936	M1	4	0.0534199	Chang et al. 2017
IRF4	Q15306	Y428	2	0.0553803	Chang et al. 2017
TBX3	O15119	W113	4	0.0557813	Chang et al. 2017
KDR	P35968	C482	3	0.0557974	Chang et al. 2017
ERBB3	P21860	N126	4	0.0570728	Chang et al. 2017
TP53	P04637	V197	17	0.0571984	Chang et al. 2017
SMAD4	Q13485	G510	6	0.057459	Chang et al. 2017
PLK2	Q9NYY3	L208	3	0.0580752	Chang et al. 2017
STK11	Q15831	W308	6	0.0593665	Chang et al. 2017
TP53	P04637	M133	10	0.0598449	Chang et al. 2017
KRAS	P01116	K5	3	0.0600555	Chang et al. 2017
NF1	P21359	R1870	8	0.0602896	Chang et al. 2017
EPHA7	Q15375	G656	11	0.0608812	Chang et al. 2017
ERBB2	P04626	V697	4	0.061122	Chang et al. 2017
HIST1H3H	P68431	K37	4	0.0613364	Chang et al. 2017
KEAP1	Q14145	R601	6	0.0615591	Chang et al. 2017
RAD51C	O43502	Y224	2	0.0615844	Chang et al. 2017
RAD51C	O43502	P21	4	0.0616334	Chang et al. 2017
BCL2L11	O43521	G156	6	0.0618484	Chang et al. 2017
EZH2	Q15910	K660	2	0.0620629	Chang et al. 2017
MAP2K4	P45985	R110	8	0.062597	Chang et al. 2017
TP53	P04637	H178	12	0.0627914	Chang et al. 2017
SPRED1	Q7Z699	R349	2	0.0638652	Chang et al. 2017
TP53	P04637	V218	9	0.0643907	Chang et al. 2017
CIC	Q96RK0	P203	4	0.0647601	Chang et al. 2017
KMT2C	Q8NEZ4	R4549	9	0.064939	Chang et al. 2017
KMT2C	Q8NEZ4	R56	10	0.064939	Chang et al. 2017
MEF2B	G5E9M1	K4	4	0.0651251	Chang et al. 2017
RIT1	Q92963	A77	5	0.0651693	Chang et al. 2017
PTEN	P60484	I67	4	0.0651819	Chang et al. 2017
PPP4R2	Q9NY27	M1	2	0.0652217	Chang et al. 2017
PIK3CD	O00329	R894	5	0.0656422	Chang et al. 2017
ERBB4	Q15303	F1102	5	0.0659327	Chang et al. 2017
ATM	Q13315	R2832	7	0.0660576	Chang et al. 2017
BCL2	P10415	N172	6	0.0692871	Chang et al. 2017
FGFR2	P21802	P253	6	0.0694873	Chang et al. 2017
PTEN	P60484	Y174	4	0.0712042	Chang et al. 2017
TGFBR1	P36897	I259	3	0.072583	Chang et al. 2017
ERBB4	Q15303	S774	4	0.0732417	Chang et al. 2017
CCND1	P24385	C47	4	0.0733365	Chang et al. 2017
ERBB2	P04626	A293	6	0.0736415	Chang et al. 2017
ERBB2	P04626	I767	9	0.0741556	Chang et al. 2017
BRD4	O60885	P1065	4	0.0743406	Chang et al. 2017
PGR	P06401	R836	9	0.0776187	Chang et al. 2017
PTPRS	Q13332	R1492	8	0.0779048	Chang et al. 2017
CBL	P22681	C384	4	0.0780707	Chang et al. 2017
HIST1H1C	P16403	E115	4	0.0790685	Chang et al. 2017
KDM6A	O15550	Q1003	3	0.0794831	Chang et al. 2017
PDGFRA	P16234	C235	4	0.0823671	Chang et al. 2017
PTEN	P60484	I101	4	0.0832641	Chang et al. 2017
NFE2L2	Q16236	I28	3	0.0834735	Chang et al. 2017
CDH1	P12830	Y190	3	0.0839077	Chang et al. 2017
IRS2	Q9Y4H2	G1057	3	0.0854265	Chang et al. 2017
SMAD2	Q15796	C463	4	0.0862676	Chang et al. 2017
SMAD2	Q15796	R321	9	0.0862676	Chang et al. 2017
SPOP	O43791	K129	3	0.0864495	Chang et al. 2017
CARD11	Q9BXL7	R423	6	0.0866304	Chang et al. 2017
TRAF7	Q6Q0C0	R189	4	0.0869694	Chang et al. 2017
KIT	P10721	R888	7	0.0873754	Chang et al. 2017
IKZF1	Q13422	E304	8	0.0875565	Chang et al. 2017
RHOA	P61586	L69	5	0.088486	Chang et al. 2017
TNFRSF14	Q92956	C111	3	0.0888304	Chang et al. 2017
PMS2	P54278	K651	4	0.0894081	Chang et al. 2017
MAP2K1	Q02750	N122	3	0.0894798	Chang et al. 2017
SDHAF2	Q9NX18	S10	5	0.0901169	Chang et al. 2017
RAC1	P63000	K116	2	0.0909173	Chang et al. 2017
CCND1	P24385	E9	5	0.0910705	Chang et al. 2017
EIF4A2	Q14240	M1	4	0.091343	Chang et al. 2017
CREBBP	Q92793	I1431	4	0.0936695	Chang et al. 2017
ARID1B	Q8NFD5	T1639	5	0.0938231	Chang et al. 2017
VHL	P40337	W117	6	0.0942718	Chang et al. 2017
VHL	P40337	Y112	5	0.0942718	Chang et al. 2017
WHSC1	O96028	T1150	3	0.0946427	Chang et al. 2017
SOS1	Q07889	A90	5	0.0949774	Chang et al. 2017
SMAD2	Q15796	T303	3	0.0953428	Chang et al. 2017
EP300	Q09472	L415	3	0.0954267	Chang et al. 2017
SMARCA4	P51532	R1157	7	0.0955798	Chang et al. 2017
PTEN	P60484	W274	7	0.0955806	Chang et al. 2017
SMAD2	Q15796	P305	4	0.0969118	Chang et al. 2017
SF3B1	O75533	V701	4	0.0969152	Chang et al. 2017
NOTCH1	P46531	I471	4	0.0983536	Chang et al. 2017
RAC1	P63000	C18	4	0.0992432	Chang et al. 2017
CTCF	P49711	M1	4	0.0997648	Chang et al. 2017
STK11	Q15831	G196	6	0.0999093	Chang et al. 2017
FBXW7	Q969H0	T385	4	0.0999936	Chang et al. 2017
FBXW7	Q969H0	R393	7	0.0999936	Chang et al. 2017

## Sheet: Non-recurrent_variants
Gene	Uniprot	Mutation
NT5C3A	Q9H0P0	E151A
PGR	P06401	D330E
NSD1	Q96L73	G1430A
NT5C3A	Q9H0P0	L300I
DNAH9	Q9NYC9	R2946Q
ATM	Q13315	R2227C
TCF20	Q9UGU0	G434L
CREBBP	Q92793	N731D
PCMTD1	Q96MG8	G185D
SHB	Q15464	V481F
DNAH9	Q9NYC9	F1513L
RICTOR	Q6R327	S816F
SSBP3	Q9BWW4	V174G
MAGI2	Q86UL8	R887C
KMT2C	Q8NEZ4	L1372I
SLC4A11	Q8NBS3	V766E
SPTA1	P02549	Q900P
TROAP	Q12815	S213L
CREBBP	Q92793	Q482R
DNAH9	Q9NYC9	E196A
PTPRS	Q13332	L125F
MYC	P01106	S79N
MYC	P01106	D236N
NOTCH1	P46531	V2021I
DNAH9	Q9NYC9	A873T
FOXO1	Q12778	D475N
IGF1R	P08069	I37S
SPTA1	P02549	L1966R
SPTA1	P02549	L55V
TET1	Q8NFU7	G1524D
PNLIPRP3	Q17RR3	H163Y
BRCA2	P51587	S1479R
DNAH9	Q9NYC9	L2776P
COBL	O75128	K697I
NOTCH1	P46531	G597C
BRAF	P15056	T508I
XPO6	Q96QU8	S7P
ACSBG2	Q5FVE4	W118G
ABCC10	Q5T3U5	P807L
PREX2	Q70Z35	L434V
SPTA1	P02549	E1526Q
ATM	Q13315	L2307R
DNAH9	Q9NYC9	T4410R
PRKCI	P41743	D463H
RICTOR	Q6R327	G1474V
BNC2	Q6ZN30	Y216N
ARAF	P10398	Q383H
AR	P10275	Q24H
MED12	Q93074	L1099F
CYP7B1	O75881	P410L
CRB1	P82279	S1025G
CHD3	Q12873	V336M
MYCN	P04198	K348E
NAP1L3	Q99457	P446T
ARID1A	O14497	P408L
TRUB1	Q8WWH5	I300V
POLE	Q07864	S1361R
BCL2L12	Q9HB09	I58L
SDHA	P31040	A391S
ABCC10	Q5T3U5	N1261S
PCMTD1	Q96MG8	L187F
MAGEC1	O60732	P42L
IGF1R	P08069	R485I
CDK12	Q9NYV4	F813V
KMT2C	Q8NEZ4	R2124M
LAMC1	P11047	S417I
EPAS1	Q99814	Y811C
FUBP1	Q96AE4	G358V
SPTA1	P02549	A314S
RB1	P06400	L665R
C6	P13671	M616K
CYP7B1	O75881	D136H
OVGP1	Q12889	H604L
AMPD1	P23109	A397S
IGF1R	P08069	T1163A
KIAA1468	Q9P260	E255G
IL7R	P16871	C377S
RIT1	Q92963	D87N
ATM	Q13315	A2626V
GLI1	P08151	G819A
KLF5	Q13887	H397P
FAT1	Q14517	T3142M
APC	P25054	V617G
IRF4	Q15306	S114R
SETD2	Q9BYW2	P1439S
NF1	P21359	M902R
SPTA1	P02549	D2221Y
FAT1	Q14517	S4031P
MAGOH	P61326	D43E
PCSK5	Q92824	R215H
EIF4A2	Q14240	I384S
OXA1L	Q2M1J6	H252L
APC	P25054	D2131Y
SLC27A5	Q9Y2P5	Q481K
PASD1	Q8IV76	W389L
CYP2C8	P10632	S336N
FGFR4	P22455	D511H
ARID1B	Q8NFD5	Q981L
CSPG5	O95196	R60W
TOP2B	Q02880	Q920K
FRMD6	Q96NE9	D53H
APC	P25054	S2174R
FOXA1	P55317	Y68F
FOXL2	P58012	G198C
BRD4	O60885	I171T
ARID1A	O14497	N1705D
KAT8	Q9H7Z6	S37T
JAK1	P23458	T687I
CTCF	P49711	N660S
ERBB3	P21860	G497S
LRP1	Q07954	R1281C
LRP5	O75197	S1396C
TET1	Q8NFU7	P307H
PDGFRA	P16234	C814Y
RAD50	Q92878	S237L
PAK7	Q9P286	S243R
LAMC1	P11047	S534C
CR1	E9PDY4	S189L
FH	P07954	E168Q
PGR	P06401	I699M
LRP1	Q07954	P2481A
IGF1R	P08069	H394Y
ANKRD11	Q6UB99	D1061H
CHD3	Q12873	E606Q
NF1	P21359	R2150T
PIK3R2	O00459	R218C
AXL	P30530	Q878E
NCOA3	Q9Y6Q9	L307V
CCT8	P50990	S161L
CTNNB1	P35222	E53D
TACC3	Q9Y6A5	E519Q
EZH2	Q15910	D36N
PCMTD1	Q96MG8	S115L
NHS	Q6T4R5	E1297K
TGFBR1	P36897	V65G
ERBB4	Q15303	T475P
TGFBR2	P37173	C168Y
SLC4A11	Q8NBS3	C77Y
SHROOM1	Q2M3G4	G714D
NOTCH1	P46531	L2429V
MED12	Q93074	V1311M
EPHA7	Q15375	D131H
ELTD1	Q9HBW9	S540R
SPTA1	P02549	K1647T
RPL10L	Q96L21	K121N
PNLIPRP3	Q17RR3	S81L
BCOR	Q6W2J9	D456H
FAT1	Q14517	V2201A
ATP6V1B2	P21281	R400Q
ANKRD11	Q6UB99	G101E
PAX5	Q02548	N29H
NCOA3	Q9Y6Q9	D281Y
MED12	Q93074	Q43P
MYC	P01106	L164V
TNFRSF14	Q92956	G60V
KMT2D	O14686	K1412R
BCL2	P10415	V156L
PTPN11	Q06124	L475P
SOCS1	O15524	F135C
PIK3CB	P42338	R399Q
BCL6	P41182	H669Y
MAGI2	Q86UL8	S2P
KMT2C	Q8NEZ4	S2095G
KMT2C	Q8NEZ4	Y2094F
PBRM1	Q86U86	N122Y
MYO18A	Q92614	A334V
ZBTB7A	O95365	F63S
MYC	P01106	R5Q
MYC	P01106	V6L
CELSR1	Q9NYQ6	Y1535C
CELSR1	Q9NYQ6	W1527C
SMARCB1	Q12824	R376G
APC	P25054	G2227V
MYC	P01106	Y27C
MYC	P01106	Y31H
RHOA	P61586	I23R
PTPRD	P23468	T1435I
MYC	P01106	S264N
MYC	P01106	F3S
TMEM131	Q92545	S1256C
KDR	P35968	I669V
EPHA7	Q15375	L227V
EPHA7	Q15375	D531H
TUBGCP4	Q9UGJ1	C90G
SMAD4	Q13485	S325C
RIMS1	Q86UR5	L1510P
MAGI2	Q86UL8	D368G
CREBBP	Q92793	Q2276H
CBL	P22681	Y731C
STAG2	Q8N3U4	F467L
TET1	Q8NFU7	E407V
AKT1	P31749	R465C
DNAH9	Q9NYC9	P2232Q
DNAH9	Q9NYC9	H2788Q
C5orf49	A4QMS7	H41R
PCDHA10	Q9Y5I2	Q751H
EPHA7	Q15375	V200E
KDM6A	O15550	M1270T
ALK	Q9UM73	S409I
MTOR	P42345	C2400Y
CRNKL1	Q9BZJ0	R29G
LRP5	O75197	D1331N
PGR	P06401	L147I
KIAA1468	Q9P260	A706S
BNC2	Q6ZN30	C35R
ELTD1	Q9HBW9	N45K
BTBD11	A6QL63	P664T
FZD10	Q9ULW2	G46V
DHRS4	Q9BTZ2	A117V
CDK12	Q9NYV4	A578V
STAT3	P40763	M200I
TGFBRAP1	Q8WUH2	A254S
MYD88	Q99836	G168V
ARID2	Q68CP9	R1728T
AXL	P30530	S608F
ZNF649	Q9BS31	F187L
ALK	Q9UM73	S1157T
THSD7B	Q9C0I4	G214C
CCT8	P50990	L258F
IDH1	O75874	I380F
DNAH9	Q9NYC9	Q2633H
CHEK2	O96017	N112I
SMO	Q99835	M449L
RET	P07949	F174L
KMT2D	O14686	Y5472C
DDX28	Q9NUL7	A433V
ANKRD11	Q6UB99	A1840V
CHD3	Q12873	G157R
TBX2	Q13207	R436C
RPTOR	Q8N122	S285G
KIAA1468	Q9P260	L745F
TGFBRAP1	Q8WUH2	R426C
CASP8	Q14790	M163I
EP300	Q09472	Q974R
VHL	P40337	G29D
WHSC1	O96028	G92D
WHSC1	O96028	A427T
PIK3R1	P27986	A682V
APC	P25054	H1009R
CARD11	Q9BXL7	T353A
COBL	O75128	D438G
RSBN1L	Q6PCB5	A111T
NOTCH1	P46531	E1525G
MAGOH	P61326	R47I
ATM	Q13315	R13H
ATM	Q13315	F1445C
ATM	Q13315	Y2124C
ATM	Q13315	Y2404D
POLE	Q07864	F104L
CYSLTR2	Q9NS75	F5C
CREBBP	Q92793	R413Q
SOCS1	O15524	A89T
RAD51C	O43502	R319Q
2021-03-10	Q8NA82	R660C
2021-03-10	Q8NA82	E638D
ARHGAP28	Q9P2N2	L226R
NOL4	O94818	L568M
SMAD4	Q13485	P246R
DNMT1	P26358	R246Q
CCT8	P50990	A70S
MYO18B	F5GYU7	K1478T
WDR52	Q96MT7	K1570N
EPHB1	P54762	D706N
BCL6	P41182	A410T
WHSC1	O96028	E1339D
FAT1	Q14517	P509L
RIMS1	Q86UR5	P584H
EBF2	Q9HAK2	R363I
PREX2	Q70Z35	A855T
CIZ1	Q9ULV3	F807L
BCOR	Q6W2J9	R118I
RBM10	P98175	V147D
CYP4A11	Q02928	V3I
KIF26B	Q2KJY2	V1901M
PLCB3	Q01970	S404L
KMT2D	O14686	L4107M
IGF1R	P08069	T500M
MYO18A	Q92614	R960Q
MYO18A	Q92614	R237H
BCL2L11	O43521	P21L
MYO18B	F5GYU7	R2152H
EP300	Q09472	P551S
PLK2	Q9NYY3	L230Q
PIK3R1	P27986	R543I
RIMS1	Q86UR5	P452H
PCMTD1	Q96MG8	Y41H
CIZ1	Q9ULV3	E751D
NOTCH1	P46531	S836N
ARAF	P10398	V522L
LCE1F	Q5T754	G116C
SPTA1	P02549	A2097V
LAMC1	P11047	V911M
ATM	Q13315	T915A
HNF1A	P20823	P153H
IGF1R	P08069	L181M
ANKRD11	Q6UB99	A1288T
CANT1	Q8WVQ1	L5Q
BRD4	O60885	R669C
ESR1	P03372	A58T
BRAF	P15056	A718V
BNC2	Q6ZN30	A445V
BCOR	Q6W2J9	T329I
FUBP1	Q96AE4	P496L
AMPD1	P23109	V163A
NOTCH2	Q04721	R1895C
LAMC1	P11047	G1261S
KIF26B	Q2KJY2	E1899K
SMARCD1	Q96GM5	R274W
CDH1	P12830	S191N
MYO18A	Q92614	R1747W
ZNF516	Q92618	A598T
SOS1	Q07889	R547W
SF3B1	O75533	R1041H
ANKZF1	Q9H8Y5	R303Q
CELSR1	Q9NYQ6	V702M
CELSR1	Q9NYQ6	R647C
RAD50	Q92878	I1109T
NSD1	Q96L73	G1929W
PREX2	Q70Z35	V1540A
CHEK2	O96017	M331T
MED28	Q9H204	S41R
CBL	P22681	A602T
KMT2D	O14686	V149I
TBX3	O15119	A664V
ANKRD11	Q6UB99	E2522K
KIAA1468	Q9P260	R789W
ARID3A	Q99856	R476C
ZBTB7A	O95365	L463M
PIK3R2	O00459	V579M
EPAS1	Q99814	D258N
RUNX1	Q01196	P395L
VHL	P40337	L201P
FAT1	Q14517	L3062S
ARID1B	Q8NFD5	R2212H
NOTCH1	P46531	C1045Y
LRP5	O75197	V1410M
KMT2D	O14686	R5323C
BTBD11	A6QL63	V613G
SPOP	O43791	K180E
EP300	Q09472	P1986A
CELSR1	Q9NYQ6	D2286N
CELSR1	Q9NYQ6	A905V
WDR52	Q96MT7	P1844S
KDR	P35968	G893D
SHROOM1	Q2M3G4	R732Q
RIMS1	Q86UR5	T855I
INMT	O95050	E222K
RXRA	P19793	A311T
GLI1	P08151	T320M
GPRIN2	O60269	A359V
ATM	Q13315	K24T
TPSD1	Q9BZJ3	N223K
CREBBP	Q92793	A1907V
KCNJ12	Q14500	V163M
SPOP	O43791	A61T
BRD4	O60885	N560K
TMEM131	Q92545	S418Y
RQCD1	Q92600	P50H
EP300	Q09472	Q1862P
TCF20	Q9UGU0	A1681V
EYA4	O95677	A629T
ARID1B	Q8NFD5	S1135R
MED12	Q93074	R540C
BTBD11	A6QL63	R434H
SPTA1	P02549	Q434E
THSD7B	Q9C0I4	R1454H
BCOR	Q6W2J9	K1360R
CTCF	P49711	K405E
ACADS	P16219	R247C
PASD1	Q8IV76	N22Y
ARID1A	O14497	S2079I
JAK1	P23458	K736E
SPTA1	P02549	K1374R
GPRIN2	O60269	S122P
LRP5	O75197	R1237Q
KMT2D	O14686	G1636D
FOXO1	Q12778	A574D
PACS2	E9PB38	D226N
MYO9A	B2RTY4	R1921W
IGF1R	P08069	A943T
TRAF7	Q6Q0C0	S348N
XPO6	Q96QU8	P745S
STAT3	P40763	G342S
NOL4	O94818	G76A
BRD4	O60885	R1060C
NPAS1	Q99742	R351C
THSD7B	Q9C0I4	T693M
TCF20	Q9UGU0	A1292T
PRKCI	P41743	G398S
PIK3CA	P42336	K986N
ABCC10	Q5T3U5	L187P
CARD11	Q9BXL7	R920C
CARD11	Q9BXL7	N444K
EHMT1	Q9H9B1	A63T
BRD4	O60885	P56H
S100A8	P05109	A82T
CRB1	P82279	G936R
KIF26B	Q2KJY2	G1579V
PGR	P06401	P307H
ARID2	Q68CP9	D444Y
ARID2	Q68CP9	Q488R
KMT2D	O14686	G3189R
BTBD11	A6QL63	A185T
TBX3	O15119	P579S
IRS2	Q9Y4H2	S770P
B2M	P61769	I66N
SLC16A13	Q7RTY0	G341D
DNAH9	Q9NYC9	A2803V
KCNJ12	Q14500	V168G
SMAD2	Q15796	P177S
KIAA1468	Q9P260	K877N
ZNF516	Q92618	D545V
ACSBG2	Q5FVE4	A225T
NPAS1	Q99742	A102T
MYT1L	Q9UL68	K76E
ALK	Q9UM73	D769G
EPAS1	Q99814	A698T
MYO18B	F5GYU7	R113H
CELSR1	Q9NYQ6	G1662C
CELSR1	Q9NYQ6	A504D
FOXP1	Q9H334	Q194H
PIK3CB	P42338	A439V
BCL6	P41182	D338G
WHSC1	O96028	R401W
APC	P25054	N1290K
ABCC10	Q5T3U5	T296I
RIMS1	Q86UR5	R721M
MAGI2	Q86UL8	D91G
KMT2C	Q8NEZ4	V4338A
PPP6C	O00743	F191L
RXRA	P19793	A121T
RXRA	P19793	A416T
AR	P10275	V478A
TET1	Q8NFU7	C1482Y
MYO18B	F5GYU7	R1799Q
ELTD1	Q9HBW9	G104A
MYT1L	Q9UL68	T1033M
DNAH9	Q9NYC9	L570R
SOX17	Q9H6I2	R204H
TCF7L2	Q9NQB0-7	L48P
RIMS1	Q86UR5	S229F
HOOK2	Q96ED9	S665I
RET	P07949	R250C
CHD3	Q12873	F847S
U2AF1	Q01081	R229K
FBXW7	Q969H0	N542I
NOL4	O94818	R344G
ATM	Q13315	V734A
KMT2D	O14686	C1424W
TACC3	Q9Y6A5	E822K
LAMC1	P11047	A125T
SYT13	Q7L8C5	A112T
INPPL1	O15357	A973V
KIAA1468	Q9P260	A99V
ARID3A	Q99856	E287D
SMARCA4	P51532	G1146S
ZNF649	Q9BS31	G108R
MYT1L	Q9UL68	K751T
MYT1L	Q9UL68	L200P
CASP8	Q14790	I501T
CTNNB1	P35222	R225C
CSPG5	O95196	A338T
WHSC1	O96028	G795R
PIK3R1	P27986	E666K
PCDHA10	Q9Y5I2	G382R
ARID1B	Q8NFD5	G324A
ARID1B	Q8NFD5	G326A
CHST12	Q9NRB3	R276W
PTPRD	P23468	S504P
PCDHA10	Q9Y5I2	V447M
FBXW7	Q969H0	D560G
PTPRS	Q13332	V1531I
MTOR	P42345	N1899D
MTOR	P42345	T1844A
JUN	P05412	A306V
RPS6KA4	O75676	V328A
TROAP	Q12815	R25H
BTBD11	A6QL63	V635A
KAT8	Q9H7Z6	A7D
KAT8	Q9H7Z6	V406A
CHD3	Q12873	P2013H
CDK12	Q9NYV4	S316N
NPAS1	Q99742	L42Q
MYT1L	Q9UL68	T63A
MYT1L	Q9UL68	G44D
RQCD1	Q92600	D269G
SLC4A11	Q8NBS3	A578T
SLC4A11	Q8NBS3	D480G
DNMT3B	Q9UBC3	F549L
MYO18B	F5GYU7	G842S
CSPG5	O95196	G394V
MST1	G3XAK1	A367T
PBRM1	Q86U86	E1035G
EPHB1	P54762	Y471F
RICTOR	Q6R327	V45M
FGFR4	P22455	R139T
HIST1H3B	P68431	T33A
EYA4	O95677	T295I
KMT2C	Q8NEZ4	P3910S
PRDM14	Q9GZV8	H220R
NOTCH2	Q04721	R2019L
NOTCH2	Q04721	G1531V
RPS6KA4	O75676	Y44H
BRCA2	P51587	G1840V
SEMA4B	Q9NPR2	E65K
SMARCA4	P51532	K1098R
TGFBRAP1	Q8WUH2	V244M
CTLA4	P16410	I102T
CELSR1	Q9NYQ6	S2140N
PIK3CA	P42336	A511T
PDHA1	P08559	R342Q
JAK1	P23458	L531M
LAMC1	P11047	Q611R
PTEN	P60484	A3D
OXA1L	Q2M1J6	R394W
NF1	P21359	L104S
THRA	P10827	R104H
RPTOR	Q8N122	T1071I
SLC4A11	Q8NBS3	T517M
CTNNB1	P35222	G730S
KIT	P10721	T847M
METTL14	Q9HCE5	R408Q
RIMS1	Q86UR5	L22Q
PTPRD	P23468	Y1361H
NOTCH1	P46531	T349I
BCOR	Q6W2J9	V806I
JUN	P05412	L121P
CRB1	P82279	M774I
TET1	Q8NFU7	A1896V
PLCB3	Q01970	A725T
CCND1	P24385	A187T
ATM	Q13315	I352N
TROAP	Q12815	E507D
SMARCD1	Q96GM5	D218E
ERBB3	P21860	V295A
POLE	Q07864	L1347P
RPL10L	Q96L21	Q133R
PACS2	E9PB38	P298H
MAP2K1	Q02750	V258I
SEMA4B	Q9NPR2	V479M
CREBBP	Q92793	R2052W
DDX28	Q9NUL7	H359Q
ANKRD11	Q6UB99	S1698N
CHD3	Q12873	E511D
CHD3	Q12873	L1200M
ARL16	Q0P5N6	R7W
SMAD4	Q13485	G299R
PTPRS	Q13332	K1090E
PTPRS	Q13332	P292S
DNMT1	P26358	A1313T
DNMT1	P26358	D702V
SMARCA4	P51532	L456P
HOOK2	Q96ED9	L358P
HOOK2	Q96ED9	R254G
PIK3R2	O00459	P20L
CIC	Q96RK0	T303M
SLC27A5	Q9Y2P5	L458I
SLC27A5	Q9Y2P5	P23S
SOS1	Q07889	G1129V
CRNKL1	Q9BZJ0	H414Y
DNMT3B	Q9UBC3	G15S
PTPRT	O14522	L781M
CHEK2	O96017	V25I
CELSR1	Q9NYQ6	T337A
MST1	G3XAK1	M448V
TP63	Q9H3D4	T39A
TACC3	Q9Y6A5	A443V
MAP3K1	Q13233	V1274A
RIMS1	Q86UR5	R526Q
ESR1	P03372	A491T
COBL	O75128	L207P
BRAF	P15056	M53T
EZH2	Q15910	R358C
KMT2C	Q8NEZ4	Y4884C
KMT2C	Q8NEZ4	E1436D
FGFR1	P11362	R706Q
PREX2	Q70Z35	R427G
PRDM14	Q9GZV8	R332H
SHB	Q15464	P212L
EHMT1	Q9H9B1	Y952H
MED12	Q93074	V1119G
SMAD4	Q13485	F505Y
MYO18A	Q92614	R1059H
INPPL1	O15357	E1132K
TBX3	O15119	A472V
IGF1R	P08069	N1049D
CDK12	Q9NYV4	V1187A
ZNF516	Q92618	A373T
PTPRS	Q13332	R612S
CCT8	P50990	C430R
CELSR1	Q9NYQ6	L2454F
CEP63	Q96MT8	E691K
TSC22D2	O75157	D695E
PREX2	Q70Z35	V167A
BTBD11	A6QL63	F1063L
MYCN	P04198	S64G
PIK3CA	P42336	H419N
KCNQ5	Q9NR82	R821H
XPO1	O14980	T1030S
CELSR1	Q9NYQ6	L1265Q
CTCF	P49711	D693N
BNC2	Q6ZN30	R291H
PIK3CD	O00329	N918K
MTOR	P42345	I2457M
CYP4A11	Q02928	K115N
SPTA1	P02549	F1085L
SPTA1	P02549	K858T
SPTA1	P02549	K199Q
CRB1	P82279	F786Y
CR1	E9PDY4	L2318I
TET1	Q8NFU7	K540T
CYP2C8	P10632	S460F
PNLIPRP3	Q17RR3	F241V
MYOD1	P15172	D32N
INPPL1	O15357	R347Q
INPPL1	O15357	K978N
PGR	P06401	L727I
PGR	P06401	S99N
ATM	Q13315	L1826V
TROAP	Q12815	F725L
PTPN11	Q06124	K325T
TPTE2	Q6XPS3	V88A
FLT3	P36888	Q946H
FLT3	P36888	F804C
BRCA2	P51587	L951I
DIS3	Q9Y2L1	K9Q
CLEC14A	Q86T13	R434M
DICER1	Q9UPY3	E866K
SPRED1	Q7Z699	V229A
SPRED1	Q7Z699	K288T
MAP2K1	Q02750	K35N
MYO9A	B2RTY4	S1657P
ARIH1	Q9Y4X5	R132I
PRSS27	Q9BQR3	D223N
CREBBP	Q92793	A619T
XPO6	Q96QU8	K431T
CHD3	Q12873	F1063V
DNAH9	Q9NYC9	R733W
DNAH9	Q9NYC9	E1050D
DNAH9	Q9NYC9	G1310E
DNAH9	Q9NYC9	Y2756C
DNAH9	Q9NYC9	Y3699H
DNAH9	Q9NYC9	H3978R
MYO18A	Q92614	K1018N
SUZ12	Q15022	N642K
CDK12	Q9NYV4	S192Y
KIAA1468	Q9P260	I661S
DNMT1	P26358	I1428N
DNMT1	P26358	R992Q
HOOK2	Q96ED9	E126D
AXL	P30530	G46V
ERCC2	P18074	F403C
SLC27A5	Q9Y2P5	G595D
SOS1	Q07889	T614M
THSD7B	Q9C0I4	R264I
THSD7B	Q9C0I4	L732I
THSD7B	Q9C0I4	I1559M
SF3B1	O75533	R568C
ERBB4	Q15303	Y1301C
ANKZF1	Q9H8Y5	R320Q
CRNKL1	Q9BZJ0	D470G
CRNKL1	Q9BZJ0	N7S
RBM39	Q14498	R289Q
MYO18B	F5GYU7	R1022H
MYO18B	F5GYU7	R1718H
TCF20	Q9UGU0	D1728Y
CELSR1	Q9NYQ6	R1044W
TOP2B	Q02880	K566Q
CTNNB1	P35222	Q302H
SETD2	Q9BYW2	S511Y
SETD2	Q9BYW2	K115N
CSPG5	O95196	S428L
FRMD4B	Q9Y2L6	D757G
EPHB1	P54762	Q839H
PIK3CB	P42338	K412T
TSC22D2	O75157	F580S
PIK3CA	P42336	K594E
C3orf70	A6NLC5	S187Y
EIF4A2	Q14240	K227Q
BCL6	P41182	C354Y
FAT1	Q14517	V2954I
FAT1	Q14517	S2310F
FAT1	Q14517	E833A
FAT1	Q14517	S458N
RICTOR	Q6R327	R222Q
C6	P13671	S273R
PLK2	Q9NYY3	T298A
PIK3R1	P27986	N285H
APC	P25054	S1355Y
APC	P25054	M2047V
NSD1	Q96L73	C342Y
NSD1	Q96L73	E1248K
IRF4	Q15306	A222D
IRF4	Q15306	A403T
EPHA7	Q15375	L195S
EYA4	O95677	K394T
PMS2	P54278	I611M
MAGI2	Q86UL8	E124G
MET	P08581	F192L
SMO	Q99835	D486E
EZH2	Q15910	N428T
KMT2C	Q8NEZ4	K1396N
PREX2	Q70Z35	K367Q
PREX2	Q70Z35	Y1452D
PRDM14	Q9GZV8	K518T
PRDM14	Q9GZV8	H265Q
BNC2	Q6ZN30	F778C
BNC2	Q6ZN30	F442L
PAX5	Q02548	Y7H
EHMT1	Q9H9B1	V651M
EHMT1	Q9H9B1	D1176Y
FAM46D	Q8NEK8	R318K
NCOA3	Q9Y6Q9	T194P
ATM	Q13315	Q1537L
CREBBP	Q92793	P2346L
ZBTB7A	O95365	C387F
FZD10	Q9ULW2	C309R
ERBB4	Q15303	A1039E
MST1	G3XAK1	P153R
ZNF649	Q9BS31	P129A
AR	P10275	Q75L
CRB1	P82279	T1264K
CIC	Q96RK0	S68T
GATA2	P23769	A109V
MAGI2	Q86UL8	V82M
KMT2C	Q8NEZ4	I105M
RIPPLY2	Q5TAB7	Y112N
SPTA1	P02549	K1780R
ZHX3	Q9H4I2	V722I
SWI5	Q1ZZU3	F139S
H3F3A	P84243	Q20H
LRP5	O75197	Q1347H
KIF26B	Q2KJY2	T1375K
HRAS	P01112	R128L
RPL10L	Q96L21	K175N
PIK3CD	O00329	Q344L
PTPRD	P23468	D371N
KIF26B	Q2KJY2	G369C
KIF26B	Q2KJY2	A2076S
RET	P07949	A1051T
ELTD1	Q9HBW9	H405D
CR1	E9PDY4	P1764T
TACC3	Q9Y6A5	P72T
PTPRD	P23468	T337I
NOTCH2	Q04721	P653T
TCF20	Q9UGU0	A478V
RB1	P06400	N367S
DICER1	Q9UPY3	S1252I
SPTA1	P02549	G1957S
FAT1	Q14517	A2675T
EYA4	O95677	S94P
KDM6A	O15550	T1002A
ATM	Q13315	L2033V
SMARCA4	P51532	S31N
MYT1L	Q9UL68	K451T
CTNNB1	P35222	G397V
BNC2	Q6ZN30	R52T
PREX2	Q70Z35	R1305S
EGFR	P00533	D1168N
EP300	Q09472	C1790G
AXL	P30530	S635Y
PTPRD	P23468	S1006C
PTPRD	P23468	K1000Q
CEP89	Q96ST8	T62S
COBL	O75128	D537G
RIMS1	Q86UR5	D1110G
KIAA0020	Q15397	S326P
PTPRD	P23468	T1492S
RAD52	P43351	E288K
PTPN11	Q06124	K364M
FAM46D	Q8NEK8	V20A
TCEB1	Q15369	A96S
KMT2C	Q8NEZ4	T4437M
ANKRD11	Q6UB99	G1390V
MET	P08581	I1077T
KNSTRN	Q9Y448	D10Y
GNAS	P63092	R665S
SRSF2	Q01130	S171Y
PASD1	Q8IV76	Q249L
ARID1B	Q8NFD5	V2019F
NF1	P21359	V1753L
KMT2C	Q8NEZ4	F1788C
KMT2C	Q8NEZ4	L1773P
EPAS1	Q99814	Q541H
CHD3	Q12873	A585V
MAP3K1	Q13233	A694G
CELSR1	Q9NYQ6	A2261V
MET	P08581	V1188L
PIK3CB	P42338	C286R
CR1	E9PDY4	E2482D
RICTOR	Q6R327	L712F
NOTCH2	Q04721	L2116H
ARID3A	Q99856	A424V
TRUB1	Q8WWH5	V43M
NOTCH1	P46531	G1435V
CRNKL1	Q9BZJ0	N244H
EBF2	Q9HAK2	K167R
TPSD1	Q9BZJ3	P161S
MET	P08581	D153Y
ANKZF1	Q9H8Y5	E640V
ZNF649	Q9BS31	I418T
DNMT3B	Q9UBC3	S113T
PTN	P21246	T58S
ARID1B	Q8NFD5	L1971Q
KAT8	Q9H7Z6	L263P
OXA1L	Q2M1J6	S289P
MYO18A	Q92614	L268P
JAK1	P23458	S71Y
ABCC10	Q5T3U5	E314A
KIAA0020	Q15397	I562T
DNMT3A	Q9Y6K1	P799A
WDR52	Q96MT7	F743L
CELSR1	Q9NYQ6	V1112F
BCL6	P41182	V105M
KMT2D	O14686	S1440L
MTOR	P42345	Q1970E
SPOP	O43791	R124T
BCL2	P10415	A32V
ASF1B	Q9NVP2	D200G
NAP1L3	Q99457	P266R
LRP1	Q07954	K1236N
NCR1	O76036	A93S
TSC22D2	O75157	S244G
AXL	P30530	S851F
TET1	Q8NFU7	L302F
PLCB3	Q01970	L220R
KDR	P35968	N622S
RET	P07949	D1042N
FGFR2	P21802	E160A
ACSBG2	Q5FVE4	D634N
KMT2C	Q8NEZ4	P3127L
EPAS1	Q99814	T469I
ZHX3	Q9H4I2	N460T
NSD1	Q96L73	S1000F
RPS6KA4	O75676	C460F
APOBR	Q0VD83	P577L
POM121	Q96HA1	A723D
SPTA1	P02549	N240D
RAF1	P04049	F360S
PIK3CD	O00329	N39S
MAP2K4	P45985	V151L
PODXL	O00592	P24S
CHD3	Q12873	T246S
GNAS	P63092	Q125R
KCNQ5	Q9NR82	T228M
SPOP	O43791	E234K
ZHX3	Q9H4I2	T944I
AKT3	Q9Y243	K266R
DIS3	Q9Y2L1	I852S
KIF26B	Q2KJY2	S977C
PGR	P06401	L164I
KMT2C	Q8NEZ4	A1016T
ZNF516	Q92618	P477L
LRP1	Q07954	V1515L
MTOR	P42345	D1565H
SLC16A13	Q7RTY0	M84I
CDK12	Q9NYV4	E1077Q
CARD11	Q9BXL7	E634Q
NOTCH2	Q04721	R237W
PTEN	P60484	P244R
ANKRD11	Q6UB99	Q2548H
TGFBRAP1	Q8WUH2	E327K
PODXL	O00592	T126A
RXRA	P19793	G212D
NT5C3A	Q9H0P0	A18V
KDM6A	O15550	D336G
XPO1	O14980	I834M
NSD1	Q96L73	S828F
AXL	P30530	G331A
CRNKL1	Q9BZJ0	E342Q
NSD1	Q96L73	H1306Q
STAG2	Q8N3U4	I855T
CRNKL1	Q9BZJ0	D623H
ERBB3	P21860	R675S
DNMT3A	Q9Y6K1	K211T
KDM6A	O15550	G1223D
ARID1A	O14497	I2127M
CTCF	P49711	I411V
CBL	P22681	N832I
DIS3	Q9Y2L1	G347E
TUBGCP4	Q9UGJ1	S23T
ERCC2	P18074	S23C
ERBB4	Q15303	P619A
PANK3	Q9H999	E159K
ARIH1	Q9Y4X5	S517C
PAK7	Q9P286	P706L
KLF5	Q13887	K386N
MTOR	P42345	D1473H
CCT8	P50990	L119R
PIK3R2	O00459	P115S
LCE1F	Q5T754	H86P
ERBB2	P04626	D962N
CELSR1	Q9NYQ6	E651K
NSD1	Q96L73	Q1092H
MAGOH	P61326	A75T
OXA1L	Q2M1J6	P366S
DNAH9	Q9NYC9	D1644E
CELSR1	Q9NYQ6	R2013H
EPAS1	Q99814	P727L
SOS1	Q07889	T789P
FGFR3	P22607	P283S
JAK1	P23458	A67T
BRCA2	P51587	S1917L
NOTCH2	Q04721	M1605I
KIT	P10721	S240T
ARID1A	O14497	S1197C
ANKZF1	Q9H8Y5	H234Y
PIM1	P11309	D202N
TCF7L2	Q9NQB0-7	A87T
NF1	P21359	D251H
RICTOR	Q6R327	E98Q
POM121	Q96HA1	N121S
ATM	Q13315	K2465R
PCED1B	Q96HM7	I105M
ANKRD11	Q6UB99	S1424C
2021-03-10	Q8NA82	S778L
IRF4	Q15306	A100T
RTKN2	Q8IZC4	S536C
AKT1	P31749	D248H
DNAH9	Q9NYC9	E2525Q
SUZ12	Q15022	R331K
ABCC10	Q5T3U5	T1267I
PMS2	P54278	Q93E
MAGI2	Q86UL8	E1312K
CDKN1B	P46527	S2L
CD79B	P40259	G136D
SMARCA4	P51532	W642C
CIC	Q96RK0	R1496C
NF1	P21359	R1026K
IDH1	O75874	Q320H
APC	P25054	I2111T
ZHX3	Q9H4I2	G94V
HOOK2	Q96ED9	E152Q
EP300	Q09472	K1554N
GPRIN2	O60269	E365Q
KLF5	Q13887	E400K
EP300	Q09472	Q2295K
KCNJ8	Q15842	F208L
CUL3	Q13618	F563V
CRNKL1	Q9BZJ0	E737K
SETD2	Q9BYW2	P1503L
TET1	Q8NFU7	K1370T
FOXO1	Q12778	N309S
MST1	G3XAK1	V707I
KCNQ5	Q9NR82	E612Q
ERBB2	P04626	S656F
SDHA	P31040	N118Y
CANT1	Q8WVQ1	V257M
KDR	P35968	H891Y
KDM6A	O15550	P966R
HNF1A	P20823	Q141R
POLE	Q07864	E169D
PTPRS	Q13332	Q377H
RBM39	Q14498	D264H
PIK3CA	P42336	E493K
RAD50	Q92878	E492K
PANK3	Q9H999	R316T
RINT1	Q6NUQ1	E27K
RIT1	Q92963	A57G
TET1	Q8NFU7	E1640D
PTPRT	O14522	Y562C
MAP3K1	Q13233	T990S
SMARCA4	P51532	R167G
JAK1	P23458	K213R
IGF1R	P08069	E294K
NHS	Q6T4R5	A1578G
ATM	Q13315	T2666I
LRP1	Q07954	A1748S
MAX	P61244	D23H
IDH2	P48735	K48N
SMAD4	Q13485	D494Y
SF3B1	O75533	M962I
RQCD1	Q92600	S139N
FGFR4	P22455	R635S
ABCC10	Q5T3U5	D246H
KMT2C	Q8NEZ4	G4074V
SMARCA4	P51532	E650Q
EP300	Q09472	E1521Q
CLEC14A	Q86T13	E124K
IGF1R	P08069	D875N
HOOK2	Q96ED9	E500K
CHEK2	O96017	I251M
BRCA2	P51587	Q1502E
ERBB3	P21860	R135C
WDR52	Q96MT7	L543V
ZNF516	Q92618	A473V
ZBTB7A	O95365	A175V
PPP2R1A	P30153	S122F
MYO18B	F5GYU7	R1268C
RIMS1	Q86UR5	G917A
STAG2	Q8N3U4	N778K
NOL4	O94818	S312C
SPTA1	P02549	D1849Y
RAD50	Q92878	D1000H
EGFR	P00533	Q105H
RIT1	Q92963	R183H
EPHA7	Q15375	T539I
SMO	Q99835	T364I
NHS	Q6T4R5	P301L
XPO1	O14980	F882L
MAP3K1	Q13233	M1442I
BNC2	Q6ZN30	A935T
MED12	Q93074	T2165I
CYP4A11	Q02928	P400R
INPPL1	O15357	G340D
KMT2C	Q8NEZ4	T2740S
ERBB4	Q15303	A845V
TP63	Q9H3D4	D563N
CYP2C8	P10632	S359N
PRDM14	Q9GZV8	D375N
PRDM14	Q9GZV8	E355Q
PRDM14	Q9GZV8	E351D
ARID2	Q68CP9	H48Y
CLEC14A	Q86T13	E427K
IGF1R	P08069	V988I
ARID1B	Q8NFD5	S537F
BRAF	P15056	A561E
RIMS1	Q86UR5	P1024T
MED12	Q93074	E469K
FBXW7	Q969H0	S227F
MYC	P01106	R439Q
PTPRD	P23468	S812R
TUBGCP4	Q9UGJ1	H421Y
WDR73	Q6P4I2	D297H
EIF4A2	Q14240	R170K
SMARCA4	P51532	P280R
STAT3	P40763	I589M
EGFR	P00533	V786L
C16orf80	Q9Y6A4	R142Q
ZNF516	Q92618	L757S
CDH1	P12830	D552N
PLCB3	Q01970	E857K
BRCA2	P51587	D244N
KMT2D	O14686	E5247K
NHS	Q6T4R5	H653D
SDHAF2	Q9NX18	I118M
NFIC	P08651	K65E
PREX2	Q70Z35	V478M
TACC3	Q9Y6A5	L6F
PDGFRA	P16234	Y136D
NSD1	Q96L73	S57F
ABCC10	Q5T3U5	L748F
MTOR	P42345	K1981E
ARID1A	O14497	V1464D
SOS1	Q07889	H262R
ATM	Q13315	Y2470C
CDK12	Q9NYV4	T794R
ERBB2	P04626	G1201V
POLE	Q07864	R1870H
CHD3	Q12873	R1802T
KLF4	O43474	K382N
PPP4R2	Q9NY27	D234H
NF1	P21359	K1099I
MAGEC1	O60732	I1001F
POLE	Q07864	R1634H
RAD52	P43351	R46K
FGFR3	P22607	E466K
PIK3R1	P27986	K459E
C6	P13671	A739S
FZD10	Q9ULW2	W9C
PDGFRA	P16234	I1050T
FAT1	Q14517	K4504E
TMEM131	Q92545	V1678I
NF1	P21359	I526S
TACC3	Q9Y6A5	E680K
RBM39	Q14498	R180Q
ARID1A	O14497	P16S
ARID1A	O14497	G414E
FUBP1	Q96AE4	A596T
FUBP1	Q96AE4	P281L
ANKRD11	Q6UB99	P2097L
SMARCA4	P51532	G44R
XPO1	O14980	E383K
TMEM131	Q92545	S508F
THSD7B	Q9C0I4	S414F
CSPG5	O95196	G109E
FRMD4B	Q9Y2L6	G130S
WDR52	Q96MT7	E721K
UCHL1	P09936	A100T
FBXW7	Q969H0	H540Y
AHI1	Q8N157	P508S
BNC2	Q6ZN30	A143T
SHB	Q15464	G293S
SHB	Q15464	A130V
CIZ1	Q9ULV3	P685S
MED12	Q93074	H1990Y
PGR	P06401	R646I
RRAS2	P62070	K159Q
BRCA2	P51587	P3194T
KIAA0020	Q15397	K117T
PREX2	Q70Z35	P1602T
ZNF516	Q92618	T816A
SETD2	Q9BYW2	I2499S
SESN2	P58004	M479I
TBX2	Q13207	L209P
RBM39	Q14498	F259L
ZHX3	Q9H4I2	S137N
KIF26B	Q2KJY2	E9V
ATM	Q13315	H674Y
TCF20	Q9UGU0	A1591G
BRD4	O60885	K561R
MTOR	P42345	Q2524L
KMT2D	O14686	D2009G
FOXP1	Q9H334	G165R
LAMC1	P11047	R1311T
NOTCH2	Q04721	I1627V
SLC16A13	Q7RTY0	A275E
WDR73	Q6P4I2	C195R
RBM10	P98175	P45T
TCEB1	Q15369	A100P
INPPL1	O15357	F381I
RAD50	Q92878	M1004L
SPTA1	P02549	A1808V
RIMS1	Q86UR5	Y1604H
CCND3	P30281	E74D
FOXP1	Q9H334	G22R
SUZ12	Q15022	M540I
MAGEC1	O60732	P612L
EP300	Q09472	N2370I
STAG2	Q8N3U4	S219G
NF1	P21359	T197K
ANKRD11	Q6UB99	T392S
DICER1	Q9UPY3	C1153R
ASXL2	Q76L83	V401I
CBL	P22681	R299H
FRMD4B	Q9Y2L6	S628C
PNLIPRP3	Q17RR3	L164F
TCF20	Q9UGU0	M1745L
EP300	Q09472	T140I
PMS2	P54278	C276Y
PSG4	Q00888	A400T
LRP1	Q07954	E76K
PBRM1	Q86U86	I57V
KAT8	Q9H7Z6	L369Q
MAGEC1	O60732	L141V
PIK3CA	P42336	E1032D
NSD1	Q96L73	D1790G
SYT13	Q7L8C5	G287E
KMT2C	Q8NEZ4	P309R
UBXN11	Q5T124	R400C
NPAS1	Q99742	S423R
IRS2	Q9Y4H2	V1161M
NPAS1	Q99742	A384P
FAT1	Q14517	Q2392K
TRUB1	Q8WWH5	S146F
PTPRD	P23468	Q1513K
KMT2D	O14686	P875T
GLI1	P08151	G733A
ELTD1	Q9HBW9	A371S
PPP4R2	Q9NY27	E379K
CREBBP	Q92793	S549A
SLC16A13	Q7RTY0	F231L
AXL	P30530	P751T
SEMA4B	Q9NPR2	V763M
KMT2C	Q8NEZ4	P4305R
WHSC1	O96028	A333T
CREBBP	Q92793	T856I
PDPK1	O15530	N378I
RPTOR	Q8N122	V76L
KIAA1468	Q9P260	I247L
TCF20	Q9UGU0	H1221L
IGF1R	P08069	N900S
PCBP1	Q15365	S27C
TCF20	Q9UGU0	R1045Q
DIS3	Q9Y2L1	L548S
EGFR	P00533	G225C
GTF2I	P78347	M200V
JAK1	P23458	L891H
GLI1	P08151	K415Q
VHL	P40337	L85P
ERRFI1	Q9UJM3	L404R
CDK12	Q9NYV4	S1427R
2021-03-10	Q8NA82	S514P
EPHB1	P54762	V788L
FAT1	Q14517	I1655V
GATA3	P23771	P42S
CEP89	Q96ST8	S40N
DNAH9	Q9NYC9	V3022I
SLC27A5	Q9Y2P5	V562A
ATM	Q13315	P2842L
FAT1	Q14517	K2617I
ARID1A	O14497	H1608R
C3orf70	A6NLC5	D128G
CR1	E9PDY4	Q2024K
RAD51C	O43502	E45D
MYT1L	Q9UL68	N700S
LRP1	Q07954	M2346V
TUBGCP4	Q9UGJ1	N651D
FZD10	Q9ULW2	A177T
TET1	Q8NFU7	N789I
KDR	P35968	D985Y
SF3B1	O75533	Q659R
KIT	P10721	A700S
IDH1	O75874	S210N
DNAH9	Q9NYC9	H2709Q
COBL	O75128	A1252V
MAPK1	P28482	D291G
EP300	Q09472	I947T
HOOK2	Q96ED9	R619Q
FBXW7	Q969H0	G597E
C6	P13671	S782Y
LRP1	Q07954	R3714C
PBRM1	Q86U86	D446G
EPHA7	Q15375	I886R
INPPL1	O15357	T563N
CREBBP	Q92793	Q2318E
ATM	Q13315	Q2522H
IDH1	O75874	G370D
NFE2L2	Q16236	P467L
MYO9A	B2RTY4	M902L
CREBBP	Q92793	P12H
LYN	P07948	I422M
CR1	E9PDY4	L2195F
ATM	Q13315	A3006T
MYC	P01106	F130L
EGFR	P00533	V1109I
XPO1	O14980	D624G
ERBB2	P04626	F899L
AMPD1	P23109	Y142F
TET1	Q8NFU7	L270S
GNAS	P63092	E221D
JAK1	P23458	G902V
CIZ1	Q9ULV3	G73S
LYN	P07948	L493S
LYN	P07948	Y508H
KMT2C	Q8NEZ4	R4907Q
ATM	Q13315	L120R
GLI1	P08151	S785F
CRNKL1	Q9BZJ0	K748I
NOTCH2	Q04721	C1527S
TPTE2	Q6XPS3	H360Y
SMARCA4	P51532	P316S
UBXN11	Q5T124	P23S
OVGP1	Q12889	G428E
NOTCH2	Q04721	P1591L
NOTCH2	Q04721	G740E
SPTA1	P02549	E1671D
KIF26B	Q2KJY2	G537R
KCNJ8	Q15842	D251N
KMT2D	O14686	P4925S
TROAP	Q12815	P364L
TPTE2	Q6XPS3	E43K
PACS2	E9PB38	G584D
KNSTRN	Q9Y448	A6T
IGF1R	P08069	P669S
DNAH9	Q9NYC9	G444E
DNAH9	Q9NYC9	E2904K
SRSF2	Q01130	P213S
CANT1	Q8WVQ1	S156F
SMARCA4	P51532	L724F
MYT1L	Q9UL68	D816N
ALK	Q9UM73	T1547I
SOS1	Q07889	T773I
ANKZF1	Q9H8Y5	S398F
GNAS	P63092	D17N
GNAS	P63092	R596P
MST1	G3XAK1	R14K
C3orf70	A6NLC5	E229K
APC	P25054	E28K
RIMS1	Q86UR5	S3L
POM121	Q96HA1	L985F
BRAF	P15056	L618W
PCSK5	Q92824	E1459K
NOTCH1	P46531	G2292E
KDM6A	O15550	S1192F
TGFBRAP1	Q8WUH2	K630T
NOTCH2	Q04721	C729R
SPTA1	P02549	A1945T
KIF26B	Q2KJY2	G698E
PLCB3	Q01970	E1178K
ATM	Q13315	P955S
ATM	Q13315	E1186K
KMT2D	O14686	A3183V
TROAP	Q12815	P659S
LRP1	Q07954	S206F
BRCA2	P51587	P814L
DIS3	Q9Y2L1	P938L
RPL10L	Q96L21	R10Q
PACS2	E9PB38	D291N
SMAD3	P84022	G272E
MYO9A	B2RTY4	S1547F
PRSS27	Q9BQR3	E169K
CREBBP	Q92793	G811R
CHD3	Q12873	S1587F
DNAH9	Q9NYC9	I1126M
STAT3	P40763	S768F
RPTOR	Q8N122	E935K
KIAA1468	Q9P260	L938F
PTPRS	Q13332	E916K
AXL	P30530	F156L
CIC	Q96RK0	P404S
MYT1L	Q9UL68	D782N
TMEM131	Q92545	T1348I
THSD7B	Q9C0I4	R717K
ZHX3	Q9H4I2	H503Y
MYO18B	F5GYU7	P117S
TCF20	Q9UGU0	H1909Y
CTNNB1	P35222	A149V
EPHB1	P54762	T169I
TACC3	Q9Y6A5	E772Q
FAT1	Q14517	E2625K
FAT1	Q14517	T2509I
RIMS1	Q86UR5	R1004K
EYA4	O95677	D509N
RSBN1L	Q6PCB5	G227R
MAGI2	Q86UL8	D696N
HGF	P14210	G312D
PRDM14	Q9GZV8	E336K
PTPRD	P23468	P1146H
BNC2	Q6ZN30	P555S
TRIM65	Q6PJ69	S422F
WHSC1	O96028	P636S
RPS6KA4	O75676	R252Q
KMT2D	O14686	S3075L
LRP1	Q07954	P1162S
CREBBP	Q92793	P1494T
DNAH9	Q9NYC9	K1086N
KCNJ12	Q14500	E364K
CIC	Q96RK0	P1128S
TGFBRAP1	Q8WUH2	P243L
THSD7B	Q9C0I4	M1280L
THSD7B	Q9C0I4	P1427S
FAT1	Q14517	N1873I
IL7R	P16871	E70K
C6	P13671	K560E
LYN	P07948	G87R
CYP7B1	O75881	T177R
PCSK5	Q92824	M1676I
NHS	Q6T4R5	R816K
NAP1L3	Q99457	E191D
PTPN11	Q06124	T493I
MYO18B	F5GYU7	D1004N
MTOR	P42345	P1029S
CYP4A11	Q02928	L224P
AKT3	Q9Y243	M133T
RET	P07949	P799L
LRP5	O75197	H308N
LRP1	Q07954	P3572S
BTBD11	A6QL63	R831W
HNF1A	P20823	Q130P
DICER1	Q9UPY3	R392P
SPRED1	Q7Z699	P422L
KNSTRN	Q9Y448	A184V
MYO18A	Q92614	G758S
CDK12	Q9NYV4	P277S
ERBB2	P04626	A588V
ARL16	Q0P5N6	Q44H
BCL2L12	Q9HB09	E275K
PPP2R1A	P30153	A68V
MYO18B	F5GYU7	M2003L
CELSR1	Q9NYQ6	E2562K
BCL6	P41182	P295S
FGFR3	P22607	E360Q
FAT1	Q14517	S1824F
IL7R	P16871	H211Y
RIMS1	Q86UR5	E270K
RIMS1	Q86UR5	E655D
EPHA7	Q15375	A252S
CHST12	Q9NRB3	A145T
COBL	O75128	P378L
MAGI2	Q86UL8	E300K
PODXL	O00592	Q448K
KMT2C	Q8NEZ4	L4839F
PTPRD	P23468	P1007L
KDM6A	O15550	S554F
KDM6A	O15550	P1286S
NOTCH2	Q04721	C1484G
KIF26B	Q2KJY2	D711N
KIF26B	Q2KJY2	P1151L
RET	P07949	S559F
MAP2K1	Q02750	R291K
CDK12	Q9NYV4	P1005S
TCF3	P15923-2	S89F
WDR52	Q96MT7	R929K
MED28	Q9H204	L48F
PCDHA10	Q9Y5I2	V509E
BRAF	P15056	S337L
PLCB3	Q01970	P780L
PIK3CD	O00329	M844I
SESN2	P58004	G24D
FH	P07954	I93N
AKT3	Q9Y243	E450K
PCED1B	Q96HM7	G413E
KMT2D	O14686	P2241L
ERBB3	P21860	N522Y
ERBB3	P21860	G1273R
ACADS	P16219	L154F
RB1	P06400	L343F
ANKRD11	Q6UB99	L1907P
DNAH9	Q9NYC9	P91L
KCNJ12	Q14500	F87Y
STK11	Q15831	E92K
SMARCA4	P51532	P65L
CEP89	Q96ST8	S352F
CIC	Q96RK0	P55S
PPP2R1A	P30153	C504S
ALK	Q9UM73	G385D
SOS1	Q07889	R310C
MYO18B	F5GYU7	S2236F
TCF20	Q9UGU0	G1569D
TCF20	Q9UGU0	P1343L
PPP4R2	Q9NY27	E401K
PTPRD	P23468	I1629L
FAM46D	Q8NEK8	V14G
TET1	Q8NFU7	G1660K
ZNF516	Q92618	A490V
RINT1	Q6NUQ1	D612S
TNFRSF14	Q92956	G147S
FH	P07954	G326E
ATM	Q13315	P1785S
NOL4	O94818	S517F
SOS1	Q07889	P294S
SLC4A11	Q8NBS3	V644M
MYO18B	F5GYU7	D2102N
NT5C3A	Q9H0P0	G28E
IKZF1	Q13422	G14E
PCSK5	Q92824	G794E
PCSK5	Q92824	D1784N
DNAH9	Q9NYC9	D1088H
ERBB4	Q15303	A761S
NOTCH2	Q04721	C1137R
KMT2D	O14686	E1187K
TROAP	Q12815	G274E
FLT3	P36888	G456E
TPSD1	Q9BZJ3	H143Y
CREBBP	Q92793	P2255L
CTCF	P49711	P712L
RARA	P10276	G434R
ZNF516	Q92618	P999S
PTPRS	Q13332	V1425I
MYT1L	Q9UL68	E70K
SF3B1	O75533	F136L
PAK7	Q9P286	H164Y
EIF4A2	Q14240	R363S
KIT	P10721	S877F
FAT1	Q14517	E4554K
PLK2	Q9NYY3	P352S
SHROOM1	Q2M3G4	R398K
NSD1	Q96L73	P2543S
STK19	P49842	R306C
RAC1	P63000	S86F
COBL	O75128	E390K
PCMTD1	Q96MG8	A121V
PREX2	Q70Z35	L520V
PCSK5	Q92824	P1216S
MED12	Q93074	I2027T
KMT2D	O14686	P3272F
CREBBP	Q92793	G2323K
TCF20	Q9UGU0	S190F
RIMS1	Q86UR5	P1614L
SLC4A11	Q8NBS3	G372S
EP300	Q09472	P802S
ABCC10	Q5T3U5	A879T
MYC	P01106	P246S
TNFRSF14	Q92956	P172L
ARID1A	O14497	P683L
ELTD1	Q9HBW9	S615F
NOTCH2	Q04721	A1361V
SPTA1	P02549	M2376I
SPTA1	P02549	D1744N
SPTA1	P02549	D1480N
SPTA1	P02549	E627K
CRB1	P82279	E353K
CRB1	P82279	S797F
CR1	E9PDY4	H1536Y
CR1	E9PDY4	P1651S
CR1	E9PDY4	G2072E
RTKN2	Q8IZC4	S465F
TET1	Q8NFU7	G406E
TET1	Q8NFU7	R622K
TET1	Q8NFU7	S1721F
TCF7L2	Q9NQB0-7	P312L
PLCB3	Q01970	S490N
INPPL1	O15357	P945S
ETV6	P41212	P200L
KCNJ8	Q15842	P153S
ARID2	Q68CP9	P1070S
LRP1	Q07954	P54L
LRP1	Q07954	P909S
LRP1	Q07954	T2025I
GLI1	P08151	G307E
BRCA2	P51587	P1171L
IRS2	Q9Y4H2	P737L
IRS2	Q9Y4H2	P686S
OXA1L	Q2M1J6	L116I
KNSTRN	Q9Y448	L295S
ARIH1	Q9Y4X5	E49K
MEF2A	Q02078	E34K
NUP93	Q8N1F7	E214K
ANKRD11	Q6UB99	A2618V
DNAH9	Q9NYC9	D1948N
MAPK7	Q13164	G644V
NF1	P21359	L2100H
RPTOR	Q8N122	L623F
TMEM200C	A6NKL6	G85R
KIAA1468	Q9P260	R539K
MAP2K2	P36507	S372F
DNMT1	P26358	D643N
CIC	Q96RK0	P786L
MYCN	P04198	A307T
ALK	Q9UM73	E916K
THSD7B	Q9C0I4	P1470L
CASP8	Q14790	S119F
CASP8	Q14790	T464I
CTLA4	P16410	G105S
ERBB4	Q15303	E715K
RQCD1	Q92600	P291L
SLC4A11	Q8NBS3	R850K
RBM39	Q14498	P98L
PTPRT	O14522	D483N
GNAS	P63092	G241R
MYO18B	F5GYU7	D2442N
EP300	Q09472	S1232F
TCF20	Q9UGU0	P404L
TCF20	Q9UGU0	R33C
CELSR1	Q9NYQ6	S636F
TOP2B	Q02880	P1446S
PPP4R2	Q9NY27	S223F
PPP4R2	Q9NY27	P233L
GATA2	P23769	G153E
WHSC1	O96028	P1020S
MAP3K1	Q13233	S702F
MAP3K1	Q13233	P1158S
APC	P25054	L407F
PIM1	P11309	P311S
RIMS1	Q86UR5	E50K
RIMS1	Q86UR5	S228F
KCNQ5	Q9NR82	M167I
RIPPLY2	Q5TAB7	E118K
EPHA7	Q15375	G604S
EYA4	O95677	E2K
EYA4	O95677	G185R
CHST12	Q9NRB3	S64F
COBL	O75128	G1122E
COBL	O75128	A476T
COBL	O75128	P115L
POM121	Q96HA1	S124F
MAGI2	Q86UL8	S1257F
HGF	P14210	D552N
RINT1	Q6NUQ1	P297S
EZH2	Q15910	S417F
ATP6V1B2	P21281	P275L
EBF2	Q9HAK2	S432N
FGFR1	P11362	E394K
PCMTD1	Q96MG8	R25C
LYN	P07948	K9N
PREX2	Q70Z35	E651K
PRDM14	Q9GZV8	R439Q
PRDM14	Q9GZV8	D91N
PRDM14	Q9GZV8	P70L
PCSK5	Q92824	P1283L
KLF4	O43474	S112L
NOTCH1	P46531	P130S
BCOR	Q6W2J9	P1012L
FAM46D	Q8NEK8	P34L
NAP1L3	Q99457	P187L
MAGEC1	O60732	P127L
TCF20	Q9UGU0	P1784F
NSD1	Q96L73	S2415F
MYO18A	Q92614	R406C
MET	P08581	L605F
FUBP1	Q96AE4	P522S
ELTD1	Q9HBW9	D275N
SPTA1	P02549	E530K
KIF26B	Q2KJY2	P942S
TCF7L2	Q9NQB0-7	H302Y
TCF7L2	Q9NQB0-7	P495S
LRP5	O75197	H261Y
LRP5	O75197	P1594L
LRP1	Q07954	P1601S
BTBD11	A6QL63	E242K
IRS2	Q9Y4H2	G792E
MAPK7	Q13164	P804S
SUZ12	Q15022	D275E
ERBB2	P04626	P525L
ERBB2	P04626	L895F
TRIM65	Q6PJ69	F246L
SRSF2	Q01130	S200F
SMAD2	Q15796	P223S
ZBTB7A	O95365	G362D
SMARCA4	P51532	P18S
CIC	Q96RK0	G407E
CIC	Q96RK0	T1375I
NCR1	O76036	L126F
SLC27A5	Q9Y2P5	P58L
THSD7B	Q9C0I4	G899E
THSD7B	Q9C0I4	T1449S
ERBB4	Q15303	G989S
ANKZF1	Q9H8Y5	P325S
SLC4A11	Q8NBS3	S877F
DNMT3B	Q9UBC3	G212R
ZHX3	Q9H4I2	P637S
TCF20	Q9UGU0	P1726L
CELSR1	Q9NYQ6	V1522M
RAF1	P04049	P643S
SETD2	Q9BYW2	A2398V
FRMD4B	Q9Y2L6	H623Y
WDR52	Q96MT7	I702L
KDR	P35968	G1122R
IL7R	P16871	D174N
RIMS1	Q86UR5	P80L
RIMS1	Q86UR5	S1217L
RIMS1	Q86UR5	I1588K
COBL	O75128	E942K
COBL	O75128	R20C
MAGI2	Q86UL8	M1150I
MAGI2	Q86UL8	E234K
EBF2	Q9HAK2	T516I
PCSK5	Q92824	G1440S
FAM46D	Q8NEK8	P92L
PIK3CD	O00329	D605E
PGR	P06401	P831L
TROAP	Q12815	H300Y
ACSBG2	Q5FVE4	G112R
MYO18B	F5GYU7	P432S
KCNQ5	Q9NR82	V551A
CYP7B1	O75881	P96L
RPS6KA4	O75676	P562F
INPPL1	O15357	P975F
SEMA4B	Q9NPR2	P781L
NF1	P21359	S1164Y
APC	P25054	T899I
MTOR	P42345	L998F
CDK12	Q9NYV4	P672S
SMO	Q99835	R671W
SESN2	P58004	P153L
JAK1	P23458	L150I
ELTD1	Q9HBW9	S311L
OVGP1	Q12889	F200I
NRAS	P01111	G138R
NOTCH2	Q04721	P2069L
SPTA1	P02549	D2324N
SPTA1	P02549	K1202E
LAMC1	P11047	P774L
TET1	Q8NFU7	P1548L
CYP2C8	P10632	S180F
TCF7L2	Q9NQB0-7	P483L
PNLIPRP3	Q17RR3	E270K
PNLIPRP3	Q17RR3	G339E
PLCB3	Q01970	R609Q
RPS6KA4	O75676	A384V
LRP5	O75197	T267I
LRP5	O75197	G1185V
CLECL1	Q8IZS7	D60N
ERBB3	P21860	E1290K
LRP1	Q07954	P1704L
GLI1	P08151	G1000R
HNF1A	P20823	E48K
TPTE2	Q6XPS3	R354K
BRCA2	P51587	P1702L
RB1	P06400	P777S
IRS2	Q9Y4H2	P320S
OXA1L	Q2M1J6	P217S
AKT1	P31749	G130R
PACS2	E9PB38	P275S
TUBGCP4	Q9UGJ1	S541F
SMAD3	P84022	P182S
IDH2	P48735	R60C
PDPK1	O15530	G403S
CREBBP	Q92793	P2018S
APOBR	Q0VD83	G104E
KAT8	Q9H7Z6	E20K
CHD3	Q12873	P1457S
DNAH9	Q9NYC9	G1150R
MAPK7	Q13164	P591L
KCNJ12	Q14500	E113K
KCNJ12	Q14500	D247N
NF1	P21359	P278L
NF1	P21359	S575L
SUZ12	Q15022	F349L
TBX2	Q13207	R133Q
ARHGAP28	Q9P2N2	S50N
SMARCA4	P51532	P265S
SMARCA4	P51532	P919L
CEP89	Q96ST8	E728K
CEP89	Q96ST8	E461K
SLC27A5	Q9Y2P5	T74I
MYT1L	Q9UL68	E1081K
MYT1L	Q9UL68	L539F
MYT1L	Q9UL68	E443K
MYT1L	Q9UL68	D373N
SF3B1	O75533	R238C
ERBB4	Q15303	S1037F
ZHX3	Q9H4I2	P598L
NCOA3	Q9Y6Q9	P1041S
MYO18B	F5GYU7	G1028D
TCF20	Q9UGU0	R1211K
TCF20	Q9UGU0	P420L
CELSR1	Q9NYQ6	T1335I
SETD2	Q9BYW2	S2382F
PIK3CB	P42338	D543N
PIK3CB	P42338	E471K
BCL6	P41182	S330C
FGFR3	P22607	P177L
APC	P25054	P824S
APC	P25054	P1843S
APC	P25054	E2172K
APC	P25054	V2682M
STK19	P49842	G26E
RIMS1	Q86UR5	P882H
AHI1	Q8N157	P953S
IKZF1	Q13422	D285N
COBL	O75128	G790R
MAGI2	Q86UL8	P533S
BRAF	P15056	P192L
KMT2C	Q8NEZ4	F4277I
KMT2C	Q8NEZ4	P3966L
LYN	P07948	P44S
PREX2	Q70Z35	V548I
PCSK5	Q92824	D625E
PCSK5	Q92824	N665D
PCSK5	Q92824	G1044R
OBP2B	Q9NPH6	G120R
NOTCH1	P46531	L2258Q
NOTCH1	P46531	S1208F
BCOR	Q6W2J9	P1111L
FAM46D	Q8NEK8	P26L
FAM46D	Q8NEK8	S150L
MAGEC1	O60732	P723S
CR1	E9PDY4	S1644F
CRB1	P82279	P637T
CR1	E9PDY4	G344E
KIF26B	Q2KJY2	S1164F
RET	P07949	P516L
GPRIN2	O60269	Q49K
SYT13	Q7L8C5	G324E
ARID2	Q68CP9	P1001S
CHD3	Q12873	L806P
RPTOR	Q8N122	S1027F
CRNKL1	Q9BZJ0	G16E
GNAS	P63092	S413C
EP300	Q09472	M246L
CELSR1	Q9NYQ6	V2412G
GATA2	P23769	Y252F
CEP63	Q96MT8	E492K
PIK3CB	P42338	G236E
KDR	P35968	V518F
METTL14	Q9HCE5	S383F
SHROOM1	Q2M3G4	P569S
EPHA7	Q15375	E961K
EPHA7	Q15375	G377D
AHI1	Q8N157	P431S
INMT	O95050	P148S
PTN	P21246	G60E
TET1	Q8NFU7	A1296V
FOXO1	Q12778	P315F
SDHA	P31040	E144K
MTOR	P42345	D1005N
SPTA1	P02549	E2224K
CR1	E9PDY4	Y1874S
CR1	E9PDY4	G1937E
CR1	E9PDY4	P2288S
KIF26B	Q2KJY2	A1882V
RTKN2	Q8IZC4	P469S
INPPL1	O15357	G897E
KMT2D	O14686	T4053I
DIS3	Q9Y2L1	P480L
KNSTRN	Q9Y448	E222K
MYO9A	B2RTY4	P2295S
MYO9A	B2RTY4	S848F
NUP93	Q8N1F7	G805E
ANKRD11	Q6UB99	P1953L
SUZ12	Q15022	R423Q
KIAA1468	Q9P260	S859F
ZNF516	Q92618	P957S
TCF3	P15923-2	P610S
MYT1L	Q9UL68	N345S
THSD7B	Q9C0I4	E296K
RQCD1	Q92600	P254S
PTPRT	O14522	S563F
EP300	Q09472	P784S
TCF20	Q9UGU0	D155N
TOP2B	Q02880	A1113G
FAT1	Q14517	G3179V
C6	P13671	E703K
SHROOM1	Q2M3G4	P403L
PCDHA10	Q9Y5I2	G271R
RIMS1	Q86UR5	P692L
RIMS1	Q86UR5	E1644K
COBL	O75128	R1013K
RSBN1L	Q6PCB5	P423L
LYN	P07948	P512L
MAGEC1	O60732	P581S
THSD7B	Q9C0I4	H1149Y
LAMC1	P11047	T368I
RTKN2	Q8IZC4	S518L
ERBB3	P21860	S1104F
TBX2	Q13207	G640E
EPAS1	Q99814	F354L
THSD7B	Q9C0I4	G194R
THSD7B	Q9C0I4	D268N
PAK7	Q9P286	S196F
MYO18B	F5GYU7	E1848K
KDR	P35968	P451H
RIMS1	Q86UR5	R1277K
MAGI2	Q86UL8	K430E
PREX2	Q70Z35	E163K
TOP2B	Q02880	P1494L
ZNF623	O75123	P318L
NOTCH2	Q04721	E1815K
ELTD1	Q9HBW9	A287T
KIF26B	Q2KJY2	P844S
LRP1	Q07954	R2292C
LRP1	Q07954	D3017V
HNF1A	P20823	M493I
SEMA4B	Q9NPR2	P330L
SEMA4B	Q9NPR2	V691L
MAPK7	Q13164	D387N
RNF43	Q68DV7	P301S
ALK	Q9UM73	G833E
ZHX3	Q9H4I2	G950E
MYO18B	F5GYU7	S2456F
TCF20	Q9UGU0	L389F
FBXW7	Q969H0	D705N
C6	P13671	E783D
FGFR4	P22455	P163L
ARID3A	Q99856	R66Q
CRB1	P82279	S586F
LRP1	Q07954	L4510F
ERBB2	P04626	P699L
PTPRT	O14522	N654K
CCT8	P50990	S465F
EYA4	O95677	S217N
PODXL	O00592	P229S
NOTCH2	Q04721	P551L
TROAP	Q12815	P514F
UBXN11	Q5T124	G27E
SPTA1	P02549	N1956S
SPTA1	P02549	E1865K
KIF26B	Q2KJY2	S1363F
RTKN2	Q8IZC4	S45N
ETV6	P41212	P107S
MYO9A	B2RTY4	L1144F
ARIH1	Q9Y4X5	W275L
NUP93	Q8N1F7	S783F
ANKRD11	Q6UB99	R2232C
RAD51C	O43502	A175T
NOL4	O94818	E213K
KIAA1468	Q9P260	P757S
SMARCA4	P51532	P1624S
HOOK2	Q96ED9	S700F
SLC27A5	Q9Y2P5	I92F
CELSR1	Q9NYQ6	S500R
EPHB1	P54762	S217F
PRKCI	P41743	F66I
ARID1B	Q8NFD5	Q2140R
PCMTD1	Q96MG8	N11K
PCSK5	Q92824	C720Y
CIZ1	Q9ULV3	Q344R
MYOD1	P15172	P171F
LRP5	O75197	G1294N
CIC	Q96RK0	P603L
GATA2	P23769	S466F
KMT2C	Q8NEZ4	T2679I
MAGI2	Q86UL8	L1310F
CR1	E9PDY4	D312N
LRP5	O75197	P1500S
TUBGCP4	Q9UGJ1	S440F
MAP2K1	Q02750	E367K
MYO9A	B2RTY4	R1022K
TRAF7	Q6Q0C0	S69F
CREBBP	Q92793	Y1430D
DNAH9	Q9NYC9	S2699F
KCNJ12	Q14500	E304K
CDK12	Q9NYV4	E1283K
ARID3A	Q99856	A499T
MYT1L	Q9UL68	E1072K
ERBB4	Q15303	E1187K
RQCD1	Q92600	R19I
DNMT3B	Q9UBC3	P137L
EP300	Q09472	P2358L
TCF20	Q9UGU0	R864I
FAT1	Q14517	D4497N
FAT1	Q14517	S2853N
IRF4	Q15306	G9D
ARID1B	Q8NFD5	P812L
COBL	O75128	P1203S
KMT2C	Q8NEZ4	S4872F
ARAF	P10398	A225T
TRIM65	Q6PJ69	P487L
NCR1	O76036	G64E
PCBP1	Q15365	E34K
CHEK2	O96017	G229C
FGFR3	P22607	V411M
MAP3K1	Q13233	E1186K
IKZF1	Q13422	G482S
FOXA1	P55317	S217F
PTPRS	Q13332	P855L
TMEM131	Q92545	P1502L
TMEM131	Q92545	P1318F
ANKZF1	Q9H8Y5	G260K
TCF20	Q9UGU0	P702F
NHS	Q6T4R5	P1142F
PLCB3	Q01970	G237S
ZNF516	Q92618	P571S
WHSC1	O96028	P476S
TNFRSF14	Q92956	P261S
MTOR	P42345	L1637F
CYP4A11	Q02928	L496F
NOTCH2	Q04721	P2189S
SPTA1	P02549	G2406A
RET	P07949	G1071R
RTKN2	Q8IZC4	E451K
INPPL1	O15357	V872M
KCNJ8	Q15842	P276L
KMT2D	O14686	P1769S
LRP1	Q07954	L2515F
LRP1	Q07954	S2563F
TBX3	O15119	S662F
BRCA2	P51587	E357K
CLEC14A	Q86T13	G419E
DICER1	Q9UPY3	E598K
IGF1R	P08069	M1112I
KAT8	Q9H7Z6	H256Y
ANKRD11	Q6UB99	P1725L
ANKRD11	Q6UB99	E1287Q
DNAH9	Q9NYC9	G2478D
MAPK7	Q13164	A65V
STAT3	P40763	P27S
RNF43	Q68DV7	P583A
RNF43	Q68DV7	R554G
CANT1	Q8WVQ1	H342Y
SMAD2	Q15796	S82C
ZNF516	Q92618	G395D
MAP2K2	P36507	C349Y
DNMT1	P26358	P1497S
DNMT1	P26358	E1097Q
MEF2B	G5E9M1	P340L
CEP89	Q96ST8	S188F
LSM14A	Q8ND56	S96F
AXL	P30530	P282H
DNMT3A	Q9Y6K1	R597Q
SOS1	Q07889	P651L
EPAS1	Q99814	E142K
TMEM131	Q92545	Q1521H
DNMT3B	Q9UBC3	G640S
PTPRT	O14522	E1309D
NCOA3	Q9Y6Q9	S32N
TCF20	Q9UGU0	P1535L
TCF20	Q9UGU0	P324L
TCF20	Q9UGU0	S220F
TCF20	Q9UGU0	P162A
PIK3CA	P42336	G411D
APC	P25054	G2503R
SHROOM1	Q2M3G4	L850F
COBL	O75128	E488Q
MAGI2	Q86UL8	P351S
PTN	P21246	G107E
BRAF	P15056	N148S
KMT2C	Q8NEZ4	L2243F
KMT2C	Q8NEZ4	P1894L
EBF2	Q9HAK2	E250K
FGFR1	P11362	E623K
PTPRD	P23468	T930S
PTPRD	P23468	L534V
EHMT1	Q9H9B1	A828V
EHMT1	Q9H9B1	P1005L
NHS	Q6T4R5	T1177I
CYP4A11	Q02928	F431S
HSD11B1	P28845	E200K
HRAS	P01112	T58I
LRP5	O75197	S227L
ARID2	Q68CP9	P770S
IDH2	P48735	S326F
DNAH9	Q9NYC9	R3861Q
ERBB4	Q15303	D931N
ZHX3	Q9H4I2	P609L
MAP3K1	Q13233	S1080I
CR1	E9PDY4	P2299S
POLE	Q07864	E1001K
ERCC2	P18074	S578I
EPAS1	Q99814	F363L
EPAS1	Q99814	S383C
PAK7	Q9P286	E494D
CELSR1	Q9NYQ6	Q1585H
OVGP1	Q12889	G283K
KMT2D	O14686	G78K
ANKRD11	Q6UB99	S1389F
LRP1	Q07954	H3887Y
ERRFI1	Q9UJM3	P377S
FUBP1	Q96AE4	G274E
LRP1	Q07954	D3357N
PACS2	E9PB38	T812M
DNAH9	Q9NYC9	S3053N
THRA	P10827	G404R
TMEM147	Q9BVK8	P118L
THSD7B	Q9C0I4	G122D
MYO18B	F5GYU7	E2053K
CELSR1	Q9NYQ6	E1786K
INTS12	Q96CB8	P330L
EPHA7	Q15375	R781Q
MAGI2	Q86UL8	H914Y
PTN	P21246	K81E
NOTCH1	P46531	V1578G
RPS6KA4	O75676	S741F
MYO9A	B2RTY4	P1596L
IGF1R	P08069	A1128V
CASP8	Q14790	S80F
NOTCH2	Q04721	H713Y
[truncated: 39,055 more rows]
