# Supplementary material for: A full-proteome, interaction-specific characterization of mutational hotspots across human cancers
Source: HighWire-hosted journal article supplement (doi:10.1101/gr.275437.121), 2021-12-28
Supplement: Supplementary_Table_2.xlsx [file Supplementary_Table_2.xlsx]

## Sheet: Legend
Supplementary Table 2: Hotspots mapped to the full-proteome 3D human interactome network (.xlsx)
The table provides full lists of (1) interface and non-interface hotspots, (2) hotspot-affected and -unaffected interaction partners and (3) interaction pairs; and it indicates whether the associated gene is a known cancer gene in Cancer Gene Census.

## Sheet: Interface_hotspots
Gene	Uniprot	Hotspot	Interface	Cancer_Gene_Census
ACVR1	Q04771	R206	1	1
ACVR1	Q04771	R258	1	1
AKT1	P31749	Q79	1	1
AKT1	P31749	D323	1	1
AR	P10275	W741	1	1
BCL2	P10415	A131	1	1
BCL2	P10415	N172	1	1
BCL6	P41182	R594	1	1
BRAF	P15056	G466	1	1
BRAF	P15056	K601	1	1
BRAF	P15056	V600	1	1
CANT1	Q8WVQ1	K131	1	1
CARD11	Q9BXL7	E93	1	1
CASP8	Q14790	R233	1	1
CASP8	Q14790	R432	1	1
CBL	P22681	C384	1	1
CCND1	P24385	C47	1	1
CCND1	P24385	E9	1	1
CDH1	P12830	D254	1	1
CDH1	P12830	R335	1	1
CDK12	Q9NYV4	R890	1	1
CDK4	P11802	K22	1	1
CDK4	P11802	R24	1	1
CDKN2A	P42771	R80	1	1
CDKN2A	P42771	S12	1	1
CDKN2A	P42771	D84	1	1
CDKN2A	P42771	E88	1	1
CHEK2	O96017	R346	1	1
CREBBP	Q92793	W1472	1	1
CTNNB1	P35222	K335	1	1
CTNNB1	P35222	H36	1	1
CTNNB1	P35222	S33	1	1
CTNNB1	P35222	G34	1	1
CTNNB1	P35222	W383	1	1
CTNNB1	P35222	K292	1	1
CTNNB1	P35222	S37	1	1
CTNNB1	P35222	N387	1	1
CTNNB1	P35222	I35	1	1
CTNNB1	P35222	D32	1	1
DICER1	Q9UPY3	D1709	1	1
DNMT3A	Q9Y6K1	R882	1	1
EGFR	P00533	L62	1	1
EGFR	P00533	H304	1	1
EGFR	P00533	G598	1	1
EGFR	P00533	L858	1	1
EGFR	P00533	A750	1	1
EGFR	P00533	T263	1	1
EGFR	P00533	E709	1	1
EGFR	P00533	A289	1	1
EGFR	P00533	L861	1	1
EGFR	P00533	K754	1	1
EGFR	P00533	S768	1	1
EGFR	P00533	L833	1	1
EGFR	P00533	G719	1	1
EIF1AX	P47813	R13	1	1
EIF1AX	P47813	K10	1	1
EP300	Q09472	L415	1	1
ERBB2	P04626	V659	1	1
ERBB2	P04626	V777	1	1
ERBB2	P04626	L869	1	1
ERBB2	P04626	T733	1	1
ERBB2	P04626	D277	1	1
ERBB2	P04626	D769	1	1
ERBB2	P04626	G776	1	1
ERBB2	P04626	L755	1	1
ERBB2	P04626	S310	1	1
ERBB2	P04626	G660	1	1
ERBB2	P04626	V697	1	1
ERBB2	P04626	R678	1	1
ERBB3	P21860	F219	1	1
ERBB3	P21860	G284	1	1
ERBB3	P21860	N126	1	1
ERBB3	P21860	R103	1	1
ERBB3	P21860	M91	1	1
ERBB3	P21860	M60	1	1
ERBB3	P21860	E928	1	1
ERBB3	P21860	S846	1	1
ERBB3	P21860	E332	1	1
ERBB4	Q15303	Q707	1	1
ERBB4	Q15303	S774	1	1
ERCC2	P18074	E606	1	1
ERCC2	P18074	D609	1	1
ERCC2	P18074	P463	1	1
ESR1	P03372	Y537	1	1
ESR1	P03372	L536	1	1
ESR1	P03372	E380	1	1
ESR1	P03372	D538	1	1
EZH2	Q15910	K660	1	1
FBXW7	Q969H0	R479	1	1
FBXW7	Q969H0	R689	1	1
FBXW7	Q969H0	S582	1	1
FBXW7	Q969H0	E287	1	1
FBXW7	Q969H0	R441	1	1
FBXW7	Q969H0	R367	1	1
FGFR1	P11362	K656	1	1
FGFR2	P21802	P253	1	1
FGFR2	P21802	S252	1	1
FGFR3	P22607	K650	1	1
FGFR3	P22607	R248	1	1
FGFR3	P22607	Y373	1	1
FGFR3	P22607	G370	1	1
FGFR3	P22607	S249	1	1
FGFR3	P22607	G380	1	1
FH	P07954	M336	1	1
FOXA1	P55317	R261	1	1
FOXA1	P55317	I176	1	1
FOXA1	P55317	Y259	1	1
FOXA1	P55317	M253	1	1
FOXA1	P55317	H247	1	1
FOXA1	P55317	S250	1	1
FOXA1	P55317	R219	1	1
FOXA1	P55317	D226	1	1
FOXO1	Q12778	S205	1	1
FOXP1	Q9H334	R514	1	1
GATA3	P23771	M293	1	1
GLI1	P08151	R380	1	1
GNAQ	P50148	Q209	1	1
GNAQ	P50148	R183	1	1
HIST1H3B	P68431	E106	1	1
HIST1H3B	P68431	K28	1	1
HNF1A	P20823	R114	1	1
HNF1A	P20823	I27	1	1
HRAS	P01112	Q61	1	1
HRAS	P01112	K117	1	1
HRAS	P01112	G12	1	1
HRAS	P01112	G13	1	1
IDH1	O75874	R132	1	1
IRF4	Q15306	C99	1	1
KEAP1	Q14145	M110	1	1
KEAP1	Q14145	G480	1	1
KEAP1	Q14145	R470	1	1
KIT	P10721	Y823	1	1
KIT	P10721	L576	1	1
KIT	P10721	D820	1	1
KIT	P10721	D816	1	1
KRAS	P01116	A59	1	1
KRAS	P01116	G60	1	1
KRAS	P01116	K5	1	1
KRAS	P01116	D33	1	1
KRAS	P01116	Q61	1	1
MAP2K1	Q02750	Y130	1	1
MAP2K1	Q02750	N122	1	1
MAP2K4	P45985	R110	1	1
MAP2K4	P45985	R134	1	1
MAX	P61244	R60	1	1
MAX	P61244	H28	1	1
MAX	P61244	R36	1	1
MET	P08581	F1200	1	1
MET	P08581	Y1230	1	1
MET	P08581	H1094	1	1
MYOD1	P15172	L122	1	1
NFE2L2	Q16236	G81	1	1
NFE2L2	Q16236	D77	1	1
NFE2L2	Q16236	T80	1	1
NFE2L2	Q16236	E79	1	1
NFE2L2	Q16236	E82	1	1
NOTCH1	P46531	I471	1	1
NRAS	P01111	G60	1	1
NRAS	P01111	Q61	1	1
PAX5	Q02548	V26	1	1
PIK3CA	P42336	E545	1	1
PIK3CA	P42336	P471	1	1
PIK3CA	P42336	D350	1	1
PIK3CA	P42336	E453	1	1
PIK3CA	P42336	E365	1	1
PIK3CA	P42336	N345	1	1
PIK3CA	P42336	R357	1	1
PIK3CA	P42336	E542	1	1
PIK3CA	P42336	C420	1	1
PIK3CA	P42336	Q546	1	1
PIK3CA	P42336	G364	1	1
PIK3CA	P42336	V344	1	1
PIK3R1	P27986	N564	1	1
PIK3R1	P27986	Y452	1	1
PIK3R1	P27986	K379	1	1
PIK3R1	P27986	D560	1	1
PIK3R1	P27986	G376	1	1
PIK3R1	P27986	K567	1	1
PPP2R1A	P30153	P179	1	1
PPP2R1A	P30153	R183	1	1
PPP6C	O00743	R264	1	1
PTEN	P60484	R233	1	1
PTEN	P60484	Y27	1	1
PTEN	P60484	A126	1	1
PTEN	P60484	H93	1	1
PTEN	P60484	D92	1	1
PTPN11	Q06124	E69	1	1
PTPN11	Q06124	D61	1	1
PTPN11	Q06124	A72	1	1
PTPN11	Q06124	T511	1	1
PTPN11	Q06124	G507	1	1
RAC1	P63000	N92	1	1
RAC1	P63000	P29	1	1
RAC1	P63000	Q61	1	1
RAC1	P63000	P34	1	1
RAF1	P04049	S257	1	1
RAF1	P04049	S259	1	1
RB1	P06400	Y606	1	1
RHOA	P61586	R5	1	1
RHOA	P61586	Y34	1	1
RHOA	P61586	G62	1	1
RHOA	P61586	E40	1	1
RHOA	P61586	E47	1	1
RHOA	P61586	T37	1	1
RHOA	P61586	Y42	1	1
RHOA	P61586	L69	1	1
RUNX1	Q01196	R135	1	1
SETD2	Q9BYW2	H1603	1	1
SMAD2	Q15796	C463	1	1
SMAD2	Q15796	P305	1	1
SMAD2	Q15796	R321	1	1
SMAD2	Q15796	T303	1	1
SMAD3	P84022	R268	1	1
SMAD4	Q13485	G352	1	1
SMAD4	Q13485	D493	1	1
SMAD4	Q13485	R361	1	1
SMAD4	Q13485	E526	1	1
SMAD4	Q13485	Q534	1	1
SMAD4	Q13485	D355	1	1
SMAD4	Q13485	Y353	1	1
SMAD4	Q13485	D537	1	1
SMAD4	Q13485	P356	1	1
SMO	Q99835	V414	1	1
SPOP	O43791	Y87	1	1
SPOP	O43791	M117	1	1
SPOP	O43791	F133	1	1
SPOP	O43791	K129	1	1
SPOP	O43791	W131	1	1
STAT3	P40763	H410	1	1
STK11	Q15831	S216	1	1
STK11	Q15831	D194	1	1
STK11	Q15831	Q220	1	1
TP53	P04637	G244	1	1
TP53	P04637	R337	1	1
TP53	P04637	C277	1	1
TP53	P04637	R110	1	1
TP53	P04637	S241	1	1
TP53	P04637	E286	1	1
TP53	P04637	Q104	1	1
TP53	P04637	H178	1	1
TP53	P04637	K164	1	1
TP53	P04637	P250	1	1
TP53	P04637	R280	1	1
TP53	P04637	P190	1	1
TP53	P04637	N131	1	1
TP53	P04637	H168	1	1
TP53	P04637	R248	1	1
TP53	P04637	R273	1	1
TP53	P04637	M237	1	1
TP53	P04637	Q136	1	1
TP53	P04637	G245	1	1
TP53	P04637	R267	1	1
TP53	P04637	R282	1	1
TP53	P04637	N239	1	1
TP53	P04637	D259	1	1
TP53	P04637	W146	1	1
TP53	P04637	Q331	1	1
TP53	P04637	Y107	1	1
TP53	P04637	N247	1	1
TP53	P04637	P152	1	1
TP53	P04637	L265	1	1
TP53	P04637	H179	1	1
TP53	P04637	R342	1	1
TP53	P04637	D281	1	1
TP53	P04637	G105	1	1
TP53	P04637	R249	1	1
TP53	P04637	K120	1	1
TP53	P04637	Q165	1	1
TP53	P04637	Q192	1	1
TP53	P04637	C242	1	1
TP53	P04637	L130	1	1
TP53	P04637	G262	1	1
TP53	P04637	V172	1	1
TP53	P04637	R181	1	1
TP53	P04637	Y205	1	1
U2AF1	Q01081	S34	1	1
VHL	P40337	L158	1	1
VHL	P40337	C162	1	1
VHL	P40337	L169	1	1
VHL	P40337	Y112	1	1
VHL	P40337	R161	1	1
XPO1	O14980	E571	1	1
BCL2L11	O43521	G156	1	0
GTF2I	P78347	L424	1	0
KAT8	Q9H7Z6	R98	1	0
KLF5	Q13887	E419	1	0
PDPK1	O15530	P499	1	0
PGR	P06401	R836	1	0
PRKCI	P41743	R480	1	0
PROCR	Q9UNN8	R98	1	0
RHEB	Q15382	Y35	1	0
RIT1	Q92963	F82	1	0
RPS6KA4	O75676	R629	1	0
RRAS2	P62070	Q72	1	0
RXRA	P19793	S427	1	0
TCEB1	Q15369	Y79	1	0
TGFBR1	P36897	S241	1	0
UBE2D3	P61077	M30	1	0
ACVR1	Q04771	G328	0	1
AKT1	P31749	L52	0	1
AKT1	P31749	E17	0	1
AKT3	Q9Y243	E17	0	1
ALK	Q9UM73	F1174	0	1
ALK	Q9UM73	R395	0	1
ALK	Q9UM73	F1245	0	1
ALK	Q9UM73	R1275	0	1
ALK	Q9UM73	R401	0	1
APC	P25054	Q1429	0	1
APC	P25054	Q1406	0	1
APC	P25054	Q1367	0	1
APC	P25054	R876	0	1
AR	P10275	T877	0	1
AR	P10275	L701	0	1
AR	P10275	H874	0	1
ARAF	P10398	S214	0	1
ARAF	P10398	P216	0	1
ARID1A	O14497	R1461	0	1
ARID1A	O14497	G2087	0	1
ARID1A	O14497	R1989	0	1
ARID1A	O14497	R1276	0	1
ARID1A	O14497	R2158	0	1
ARID1B	Q8NFD5	T1639	0	1
ARID1B	Q8NFD5	G953	0	1
ARID1B	Q8NFD5	Q1166	0	1
ARID2	Q68CP9	S297	0	1
ARID2	Q68CP9	R314	0	1
ASXL2	Q76L83	E330	0	1
ASXL2	Q76L83	M1	0	1
ATM	Q13315	I2888	0	1
ATM	Q13315	R250	0	1
ATM	Q13315	N2875	0	1
ATM	Q13315	R2832	0	1
ATM	Q13315	L2890	0	1
ATM	Q13315	R1466	0	1
ATM	Q13315	R3008	0	1
ATM	Q13315	R337	0	1
B2M	P61769	L7	0	1
B2M	P61769	M1	0	1
B2M	P61769	L12	0	1
BCL10	O95999	E178	0	1
BCL10	O95999	N173	0	1
BCL2	P10415	G33	0	1
BCL2	P10415	K22	0	1
BCL2L12	Q9HB09	R18	0	1
BCL6	P41182	R618	0	1
BCOR	Q6W2J9	N1459	0	1
BRAF	P15056	G469	0	1
BRAF	P15056	L597	0	1
BRAF	P15056	L485	0	1
BRAF	P15056	G596	0	1
BRAF	P15056	D594	0	1
BRAF	P15056	N581	0	1
BRCA2	P51587	S2303	0	1
BRD4	O60885	P1065	0	1
CARD11	Q9BXL7	R423	0	1
CARD11	Q9BXL7	L251	0	1
CARD11	Q9BXL7	R337	0	1
CARD11	Q9BXL7	E626	0	1
CARD11	Q9BXL7	D401	0	1
CARD11	Q9BXL7	K215	0	1
CARD11	Q9BXL7	D357	0	1
CASP8	Q14790	R68	0	1
CBFB	Q13951	M1	0	1
CCND1	P24385	Y44	0	1
CCND1	P24385	T286	0	1
CCND1	P24385	P287	0	1
CCND3	P30281	I290	0	1
CD79B	P40259	Y196	0	1
CDH1	P12830	Y190	0	1
CDH1	P12830	D288	0	1
CDH1	P12830	R63	0	1
CDKN1A	P38936	M1	0	1
CDKN1B	P46527	G72	0	1
CDKN2A	P42771	L130	0	1
CDKN2A	P42771	Q50	0	1
CDKN2A	P42771	P114	0	1
CDKN2A	P42771	D108	0	1
CDKN2A	P42771	H83	0	1
CDKN2A	P42771	P48	0	1
CDKN2A	P42771	D74	0	1
CDKN2A	P42771	E120	0	1
CDKN2A	P42771	Y129	0	1
CDKN2A	P42771	N42	0	1
CIC	Q96RK0	R1515	0	1
CIC	Q96RK0	R215	0	1
CIC	Q96RK0	S231	0	1
CIC	Q96RK0	W238	0	1
CIC	Q96RK0	R202	0	1
CIC	Q96RK0	R1512	0	1
CIC	Q96RK0	R201	0	1
CIC	Q96RK0	P203	0	1
CIC	Q96RK0	N205	0	1
CREBBP	Q92793	Y1450	0	1
CREBBP	Q92793	I1431	0	1
CREBBP	Q92793	D1435	0	1
CREBBP	Q92793	W1502	0	1
CREBBP	Q92793	R1446	0	1
CREBBP	Q92793	L1499	0	1
CREBBP	Q92793	Y1482	0	1
CREBBP	Q92793	Y1503	0	1
CRNKL1	Q9BZJ0	S128	0	1
CTCF	P49711	Y226	0	1
CTCF	P49711	H284	0	1
CTCF	P49711	H288	0	1
CTCF	P49711	R377	0	1
CTCF	P49711	S354	0	1
CTCF	P49711	M1	0	1
CTNNB1	P35222	S45	0	1
CTNNB1	P35222	R535	0	1
CTNNB1	P35222	T41	0	1
CUL3	Q13618	M299	0	1
CYP2C8	P10632	P402	0	1
CYSLTR2	Q9NS75	L129	0	1
DICER1	Q9UPY3	E1813	0	1
DICER1	Q9UPY3	D1810	0	1
DICER1	Q9UPY3	S1344	0	1
EGFR	P00533	L838	0	1
EGFR	P00533	R108	0	1
EGFR	P00533	L747	0	1
EGFR	P00533	R252	0	1
EGFR	P00533	T790	0	1
EGFR	P00533	R222	0	1
EGFR	P00533	T363	0	1
EGFR	P00533	P596	0	1
EIF1AX	P47813	G15	0	1
EIF1AX	P47813	G6	0	1
EIF1AX	P47813	N4	0	1
EIF1AX	P47813	P2	0	1
EIF1AX	P47813	G9	0	1
EIF1AX	P47813	G8	0	1
EIF4A2	Q14240	M1	0	1
EP300	Q09472	C1164	0	1
EP300	Q09472	Q1455	0	1
EP300	Q09472	W1466	0	1
EP300	Q09472	D1399	0	1
EP300	Q09472	Y1467	0	1
EP300	Q09472	H1451	0	1
EP300	Q09472	Y1414	0	1
EPAS1	Q99814	Y532	0	1
EPAS1	Q99814	P531	0	1
EPHA7	Q15375	G656	0	1
ERBB2	P04626	I767	0	1
ERBB2	P04626	V842	0	1
ERBB2	P04626	R103	0	1
ERBB2	P04626	T862	0	1
ERBB2	P04626	R138	0	1
ERBB2	P04626	A293	0	1
ERBB3	P21860	R475	0	1
ERBB3	P21860	A232	0	1
ERBB3	P21860	D297	0	1
ERBB3	P21860	H228	0	1
ERBB3	P21860	K329	0	1
ERBB3	P21860	T355	0	1
ERBB3	P21860	V104	0	1
ERBB4	Q15303	K1223	0	1
ERBB4	Q15303	K1002	0	1
ERBB4	Q15303	L798	0	1
ERBB4	Q15303	F1102	0	1
ERBB4	Q15303	S1289	0	1
ERCC2	P18074	S246	0	1
ERCC2	P18074	T484	0	1
ERCC2	P18074	N238	0	1
ERCC2	P18074	Y14	0	1
ERCC2	P18074	Y24	0	1
ERCC2	P18074	Y72	0	1
ETV6	P41212	R369	0	1
ETV6	P41212	S284	0	1
EZH2	Q15910	K510	0	1
EZH2	Q15910	Y641	0	1
FBXW7	Q969H0	D520	0	1
FBXW7	Q969H0	R505	0	1
FBXW7	Q969H0	R465	0	1
FBXW7	Q969H0	G423	0	1
FBXW7	Q969H0	R224	0	1
FBXW7	Q969H0	T532	0	1
FBXW7	Q969H0	T385	0	1
FBXW7	Q969H0	S546	0	1
FBXW7	Q969H0	R14	0	1
FBXW7	Q969H0	G437	0	1
FBXW7	Q969H0	R393	0	1
FBXW7	Q969H0	R658	0	1
FBXW7	Q969H0	Y545	0	1
FGFR1	P11362	N546	0	1
FGFR2	P21802	C382	0	1
FGFR2	P21802	R203	0	1
FGFR2	P21802	N549	0	1
FGFR2	P21802	Y375	0	1
FGFR2	P21802	F276	0	1
FGFR2	P21802	N550	0	1
FGFR3	P22607	S371	0	1
FGFR4	P22455	V550	0	1
FGFR4	P22455	N535	0	1
FLT3	P36888	D835	0	1
FOXA1	P55317	S242	0	1
FOXA1	P55317	F266	0	1
FOXO1	Q12778	S22	0	1
FOXO1	Q12778	T24	0	1
FOXP1	Q9H334	S448	0	1
FUBP1	Q96AE4	R430	0	1
GATA2	P23769	C352	0	1
GATA3	P23771	R364	0	1
GATA3	P23771	R366	0	1
GNA11	P29992	R183	0	1
GNA11	P29992	Q209	0	1
GNAQ	P50148	T96	0	1
GNAQ	P50148	G48	0	1
H3F3A	P84243	K28	0	1
H3F3A	P84243	G35	0	1
HIST1H3B	P68431	E51	0	1
HNF1A	P20823	S591	0	1
HNF1A	P20823	G338	0	1
IDH2	P48735	R172	0	1
IDH2	P48735	R140	0	1
IKZF1	Q13422	E304	0	1
IL7R	P16871	R206	0	1
IL7R	P16871	I241	0	1
IL7R	P16871	K395	0	1
IRF4	Q15306	Y428	0	1
IRF4	Q15306	K123	0	1
JAK1	P23458	L910	0	1
JUN	P05412	E112	0	1
KDM6A	O15550	Q1003	0	1
KDM6A	O15550	G526	0	1
KDR	P35968	C482	0	1
KDR	P35968	S1037	0	1
KDR	P35968	R1032	0	1
KEAP1	Q14145	G417	0	1
KEAP1	Q14145	R601	0	1
KEAP1	Q14145	R260	0	1
KEAP1	Q14145	R272	0	1
KEAP1	Q14145	R320	0	1
KEAP1	Q14145	V155	0	1
KEAP1	Q14145	G333	0	1
KIT	P10721	R888	0	1
KIT	P10721	V560	0	1
KIT	P10721	K642	0	1
KIT	P10721	V559	0	1
KIT	P10721	W557	0	1
KIT	P10721	V654	0	1
KIT	P10721	N822	0	1
KMT2C	Q8NEZ4	R4549	0	1
KMT2C	Q8NEZ4	R56	0	1
KMT2D	O14686	R5432	0	1
KMT2D	O14686	R5179	0	1
KMT2D	O14686	L1375	0	1
KNSTRN	Q9Y448	V12	0	1
KNSTRN	Q9Y448	C22	0	1
KNSTRN	Q9Y448	P28	0	1
KNSTRN	Q9Y448	S24	0	1
KRAS	P01116	G13	0	1
KRAS	P01116	G12	0	1
KRAS	P01116	A11	0	1
KRAS	P01116	Q22	0	1
KRAS	P01116	A146	0	1
KRAS	P01116	K117	0	1
KRAS	P01116	L19	0	1
MAP2K1	Q02750	G128	0	1
MAP2K1	Q02750	C121	0	1
MAP2K1	Q02750	P124	0	1
MAP2K1	Q02750	F53	0	1
MAP2K1	Q02750	K57	0	1
MAP2K1	Q02750	E203	0	1
MAP2K1	Q02750	Q56	0	1
MAP2K2	P36507	F57	0	1
MAP2K4	P45985	S184	0	1
MAP3K1	Q13233	S1330	0	1
MAP3K1	Q13233	L380	0	1
MAPK1	P28482	E322	0	1
MED12	Q93074	V1223	0	1
MED12	Q93074	G44	0	1
MED12	Q93074	L1224	0	1
MET	P08581	Y1003	0	1
MET	P08581	D1010	0	1
MET	P08581	M1250	0	1
MET	P08581	V1070	0	1
MTOR	P42345	E1799	0	1
MTOR	P42345	L1460	0	1
MTOR	P42345	L2427	0	1
MTOR	P42345	S2215	0	1
MTOR	P42345	C1483	0	1
MTOR	P42345	T1977	0	1
MTOR	P42345	V2006	0	1
MTOR	P42345	F1888	0	1
MTOR	P42345	M2327	0	1
MTOR	P42345	A1971	0	1
MTOR	P42345	A1459	0	1
MTOR	P42345	I2500	0	1
MYC	P01106	V7	0	1
MYC	P01106	S161	0	1
MYC	P01106	P74	0	1
MYC	P01106	T73	0	1
MYCN	P04198	P44	0	1
MYD88	Q99836	S230	0	1
MYD88	Q99836	M219	0	1
MYD88	Q99836	L252	0	1
MYD88	Q99836	P153	0	1
NFE2L2	Q16236	Q26	0	1
NFE2L2	Q16236	L30	0	1
NFE2L2	Q16236	W24	0	1
NFE2L2	Q16236	R34	0	1
NFE2L2	Q16236	D29	0	1
NFE2L2	Q16236	G31	0	1
NFE2L2	Q16236	I28	0	1
NOTCH1	P46531	R365	0	1
NOTCH1	P46531	G310	0	1
NOTCH1	P46531	E455	0	1
NOTCH1	P46531	F853	0	1
NOTCH1	P46531	C440	0	1
NOTCH2	Q04721	T235	0	1
NRAS	P01111	G12	0	1
NRAS	P01111	G13	0	1
PBRM1	Q86U86	R710	0	1
PBRM1	Q86U86	R1185	0	1
PCBP1	Q15365	L102	0	1
PDGFRA	P16234	C235	0	1
PDGFRA	P16234	D842	0	1
PDGFRA	P16234	N659	0	1
PDGFRA	P16234	E229	0	1
PIK3CA	P42336	G1049	0	1
PIK3CA	P42336	E726	0	1
PIK3CA	P42336	C604	0	1
PIK3CA	P42336	H1065	0	1
PIK3CA	P42336	G106	0	1
PIK3CA	P42336	N1044	0	1
PIK3CA	P42336	R38	0	1
PIK3CA	P42336	M1	0	1
PIK3CA	P42336	R93	0	1
PIK3CA	P42336	E970	0	1
PIK3CA	P42336	C901	0	1
PIK3CA	P42336	G1007	0	1
PIK3CA	P42336	T1025	0	1
PIK3CA	P42336	T1052	0	1
PIK3CA	P42336	K111	0	1
PIK3CA	P42336	C90	0	1
PIK3CA	P42336	G118	0	1
PIK3CA	P42336	R88	0	1
PIK3CA	P42336	E81	0	1
PIK3CA	P42336	P539	0	1
PIK3CA	P42336	N107	0	1
PIK3CA	P42336	Y1021	0	1
PIK3CA	P42336	M1043	0	1
PIK3CA	P42336	C378	0	1
PIK3CA	P42336	D939	0	1
PIK3CA	P42336	E39	0	1
PIK3CA	P42336	M1004	0	1
PIK3CA	P42336	H1047	0	1
PIK3CA	P42336	P104	0	1
PIK3CA	P42336	R115	0	1
PIK3CA	P42336	R108	0	1
PIK3CB	P42338	E1051	0	1
PIK3CB	P42338	R321	0	1
PIK3CB	P42338	D1067	0	1
PIM1	P11309	K24	0	1
PIM1	P11309	S97	0	1
PIM1	P11309	E79	0	1
PIM1	P11309	Q37	0	1
PIM1	P11309	L2	0	1
PIM1	P11309	G28	0	1
PMS2	P54278	K651	0	1
POLE	Q07864	P286	0	1
POLE	Q07864	V411	0	1
POLE	Q07864	E18	0	1
PPP2R1A	P30153	R182	0	1
PPP2R1A	P30153	S256	0	1
PPP6C	O00743	S270	0	1
PPP6C	O00743	R301	0	1
PTEN	P60484	G129	0	1
PTEN	P60484	D24	0	1
PTEN	P60484	C136	0	1
PTEN	P60484	L320	0	1
PTEN	P60484	Y68	0	1
PTEN	P60484	H61	0	1
PTEN	P60484	I101	0	1
PTEN	P60484	I67	0	1
PTEN	P60484	Y16	0	1
PTEN	P60484	C71	0	1
PTEN	P60484	G251	0	1
PTEN	P60484	W274	0	1
PTEN	P60484	C105	0	1
PTEN	P60484	C124	0	1
PTEN	P60484	L140	0	1
PTEN	P60484	Q171	0	1
PTEN	P60484	Y178	0	1
PTEN	P60484	R130	0	1
PTEN	P60484	G165	0	1
PTEN	P60484	Y174	0	1
PTEN	P60484	R173	0	1
PTEN	P60484	M35	0	1
PTEN	P60484	L247	0	1
PTEN	P60484	G127	0	1
PTEN	P60484	G132	0	1
PTEN	P60484	T277	0	1
PTEN	P60484	Y155	0	1
PTEN	P60484	R335	0	1
PTEN	P60484	P38	0	1
PTEN	P60484	Y177	0	1
PTEN	P60484	Y346	0	1
PTEN	P60484	S170	0	1
PTEN	P60484	W111	0	1
PTPN11	Q06124	E76	0	1
PTPN11	Q06124	F285	0	1
PTPN11	Q06124	T472	0	1
PTPN11	Q06124	A465	0	1
PTPN11	Q06124	Q514	0	1
PTPN11	Q06124	N308	0	1
RAC1	P63000	C18	0	1
RAC1	P63000	G12	0	1
RAC1	P63000	A159	0	1
RAC1	P63000	K116	0	1
RARA	P10276	F286	0	1
RB1	P06400	R787	0	1
RB1	P06400	R251	0	1
RBM10	P98175	R230	0	1
RET	P07949	M918	0	1
RHOA	P61586	L22	0	1
RHOA	P61586	A161	0	1
RHOA	P61586	L57	0	1
RHOA	P61586	G17	0	1
RNF43	Q68DV7	H86	0	1
RUNX1	Q01196	R174	0	1
SDHA	P31040	L639	0	1
SDHA	P31040	V644	0	1
SDHA	P31040	S445	0	1
SDHAF2	Q9NX18	S10	0	1
SETD2	Q9BYW2	R1625	0	1
SETD2	Q9BYW2	Y1666	0	1
SF3B1	O75533	G740	0	1
SF3B1	O75533	D894	0	1
SF3B1	O75533	G742	0	1
SF3B1	O75533	K700	0	1
SF3B1	O75533	R625	0	1
SF3B1	O75533	K741	0	1
SF3B1	O75533	Y623	0	1
SF3B1	O75533	K666	0	1
SF3B1	O75533	N626	0	1
SF3B1	O75533	E902	0	1
SF3B1	O75533	V701	0	1
SMAD3	P84022	R287	0	1
SMAD4	Q13485	C363	0	1
SMAD4	Q13485	W524	0	1
SMAD4	Q13485	G510	0	1
SMAD4	Q13485	E330	0	1
SMAD4	Q13485	L536	0	1
SMAD4	Q13485	G419	0	1
SMAD4	Q13485	A118	0	1
SMAD4	Q13485	Y95	0	1
SMAD4	Q13485	G386	0	1
SMAD4	Q13485	D351	0	1
SMAD4	Q13485	R445	0	1
SMARCA4	P51532	R973	0	1
SMARCA4	P51532	R1243	0	1
SMARCA4	P51532	R1135	0	1
SMARCA4	P51532	M781	0	1
SMARCA4	P51532	R1192	0	1
SMARCA4	P51532	E821	0	1
SMARCA4	P51532	R1189	0	1
SMARCA4	P51532	R1157	0	1
SMARCA4	P51532	T910	0	1
SMARCA4	P51532	G1232	0	1
SMARCB1	Q12824	R377	0	1
SMARCB1	Q12824	R374	0	1
SMARCD1	Q96GM5	R183	0	1
SMO	Q99835	W535	0	1
SMO	Q99835	L412	0	1
SOCS1	O15524	A3	0	1
SPOP	O43791	F125	0	1
SPOP	O43791	F102	0	1
SRSF2	Q01130	P95	0	1
STAG2	Q8N3U4	R216	0	1
STAT3	P40763	S614	0	1
STAT3	P40763	F384	0	1
STAT3	P40763	D661	0	1
STK11	Q15831	E223	0	1
STK11	Q15831	P221	0	1
STK11	Q15831	G196	0	1
STK11	Q15831	H174	0	1
STK11	Q15831	P179	0	1
STK11	Q15831	E165	0	1
STK11	Q15831	W239	0	1
STK11	Q15831	W308	0	1
STK11	Q15831	G251	0	1
STK11	Q15831	G242	0	1
STK11	Q15831	N181	0	1
SUZ12	Q15022	R101	0	1
TBX3	O15119	W113	0	1
TGFBR2	P37173	R528	0	1
TGFBR2	P37173	D446	0	1
TGFBR2	P37173	E519	0	1
TNFRSF14	Q92956	M1	0	1
TNFRSF14	Q92956	C111	0	1
TP53	P04637	G266	0	1
TP53	P04637	L194	0	1
TP53	P04637	H214	0	1
TP53	P04637	V173	0	1
TP53	P04637	R213	0	1
TP53	P04637	R196	0	1
TP53	P04637	M246	0	1
TP53	P04637	E271	0	1
TP53	P04637	P278	0	1
TP53	P04637	V216	0	1
TP53	P04637	H193	0	1
TP53	P04637	V274	0	1
TP53	P04637	A159	0	1
TP53	P04637	P151	0	1
TP53	P04637	Y220	0	1
TP53	P04637	L257	0	1
TP53	P04637	E285	0	1
TP53	P04637	F109	0	1
TP53	P04637	S127	0	1
TP53	P04637	I195	0	1
TP53	P04637	V272	0	1
TP53	P04637	D208	0	1
TP53	P04637	A161	0	1
TP53	P04637	L111	0	1
TP53	P04637	V157	0	1
TP53	P04637	R175	0	1
TP53	P04637	I255	0	1
TP53	P04637	T125	0	1
TP53	P04637	F134	0	1
TP53	P04637	V197	0	1
TP53	P04637	F270	0	1
TP53	P04637	S215	0	1
TP53	P04637	R306	0	1
TP53	P04637	Y163	0	1
TP53	P04637	I232	0	1
TP53	P04637	E258	0	1
TP53	P04637	G154	0	1
TP53	P04637	F113	0	1
TP53	P04637	Q144	0	1
TP53	P04637	K132	0	1
TP53	P04637	E298	0	1
TP53	P04637	V143	0	1
TP53	P04637	Y234	0	1
TP53	P04637	Y126	0	1
TP53	P04637	C275	0	1
TP53	P04637	Y236	0	1
TP53	P04637	I251	0	1
TP53	P04637	R158	0	1
TP53	P04637	M133	0	1
TP53	P04637	C238	0	1
TP53	P04637	V218	0	1
TP53	P04637	C141	0	1
TP53	P04637	T155	0	1
TP53	P04637	C176	0	1
TP53	P04637	I254	0	1
TP53	P04637	C135	0	1
TP63	Q9H3D4	S365	0	1
TP63	Q9H3D4	R379	0	1
TP63	Q9H3D4	E609	0	1
TRAF7	Q6Q0C0	R189	0	1
TRAF7	Q6Q0C0	N520	0	1
U2AF1	Q01081	Q157	0	1
U2AF1	Q01081	I24	0	1
VHL	P40337	S111	0	1
VHL	P40337	S68	0	1
VHL	P40337	W88	0	1
VHL	P40337	S65	0	1
VHL	P40337	S80	0	1
VHL	P40337	L89	0	1
VHL	P40337	W117	0	1
VHL	P40337	N78	0	1
VHL	P40337	G114	0	1
VHL	P40337	D121	0	1
VHL	P40337	I151	0	1
VHL	P40337	P86	0	1
VHL	P40337	V74	0	1
VHL	P40337	L135	0	1
VHL	P40337	H115	0	1
WHSC1	O96028	T1150	0	1
XPO1	O14980	R749	0	1
ABCC10	Q5T3U5	R570	0	0
ACADS	P16219	R330	0	0
ACP6	Q9NPH0	V29	0	0
AMPD1	P23109	L631	0	0
ANKRD11	Q6UB99	K369	0	0
ANKZF1	Q9H8Y5	A650	0	0
ARID3A	Q99856	S557	0	0
ARIH1	Q9Y4X5	A409	0	0
ARL16	Q0P5N6	G6	0	0
ASF1B	Q9NVP2	P21	0	0
ATP6V1B2	P21281	P352	0	0
AXL	P30530	A273	0	0
C16orf80	Q9Y6A4	R100	0	0
C6	P13671	K817	0	0
CCT8	P50990	I86	0	0
CELSR1	Q9NYQ6	W1958	0	0
CEP63	Q96MT8	S153	0	0
CHD3	Q12873	I234	0	0
CIZ1	Q9ULV3	L59	0	0
COBL	O75128	E480	0	0
CTLA4	P16410	T17	0	0
CYP4A11	Q02928	I491	0	0
DDX28	Q9NUL7	S442	0	0
DHRS4	Q9BTZ2	T102	0	0
DIS3	Q9Y2L1	R780	0	0
DIS3	Q9Y2L1	R382	0	0
DIS3	Q9Y2L1	D479	0	0
DIS3	Q9Y2L1	D488	0	0
DIS3	Q9Y2L1	R689	0	0
DIS3	Q9Y2L1	L767	0	0
DNMT1	P26358	E432	0	0
DNMT1	P26358	E51	0	0
DNMT3B	Q9UBC3	V229	0	0
EHMT1	Q9H9B1	V280	0	0
EPHB1	P54762	R743	0	0
ERRFI1	Q9UJM3	K409	0	0
FAM46D	Q8NEK8	S69	0	0
FRMD6	Q96NE9	S17	0	0
GPRIN2	O60269	T100	0	0
GTF2I	P78347	F641	0	0
GTF2I	P78347	N440	0	0
HGF	P14210	G229	0	0
HIST1H1C	P16403	E115	0	0
HIST1H1C	P16403	A180	0	0
HIST1H3C	P68431	K37	0	0
HIST1H3H	P68431	K37	0	0
HOOK2	Q96ED9	S630	0	0
HSD11B1	P28845	G45	0	0
IGF1R	P08069	G129	0	0
INMT	O95050	S212	0	0
INPPL1	O15357	A1185	0	0
INPPL1	O15357	R70	0	0
IRS2	Q9Y4H2	G1057	0	0
KIAA0020	Q15397	K63	0	0
KIF26B	Q2KJY2	R2024	0	0
LAMC1	P11047	P641	0	0
LRP1	Q07954	P1058	0	0
LRP5	O75197	S1609	0	0
LYN	P07948	I364	0	0
MAGI2	Q86UL8	L603	0	0
MAGOH	P61326	I137	0	0
MAPK7	Q13164	A501	0	0
MARCH10	Q8NA82	G241	0	0
MED28	Q9H204	G7	0	0
MEF2A	Q02078	Y105	0	0
MEF2A	Q02078	P99	0	0
METTL14	Q9HCE5	R298	0	0
MYO18A	Q92614	G979	0	0
MYO9A	B2RTY4	P1300	0	0
MYT1L	Q9UL68	K203	0	0
NAP1L3	Q99457	K502	0	0
NCOA3	Q9Y6Q9	R80	0	0
NFIC	P08651	S339	0	0
NOL4	O94818	L423	0	0
NT5C3A	Q9H0P0	D322	0	0
NUP93	Q8N1F7	Q15	0	0
NUP93	Q8N1F7	E14	0	0
OVGP1	Q12889	S536	0	0
PAK7	Q9P286	M173	0	0
PANK3	Q9H999	I301	0	0
PCDHA10	Q9Y5I2	G539	0	0
PCED1B	Q96HM7	S343	0	0
PCSK5	Q92824	W924	0	0
PDHA1	P08559	G107	0	0
PIK3CD	O00329	E1021	0	0
PIK3CD	O00329	C416	0	0
PIK3CD	O00329	R894	0	0
PIK3R2	O00459	G373	0	0
PIK3R2	O00459	D557	0	0
PLK2	Q9NYY3	L208	0	0
POM121	Q96HA1	N359	0	0
PPP4R2	Q9NY27	*1	0	0
PRDM14	Q9GZV8	F204	0	0
PRDM14	Q9GZV8	R505	0	0
PTN	P21246	K44	0	0
PTPRS	Q13332	R1492	0	0
RAD50	Q92878	D69	0	0
RAD51C	O43502	P21	0	0
RAD51C	O43502	Y224	0	0
RAD52	P43351	R396	0	0
RBM39	Q14498	T353	0	0
RICTOR	Q6R327	S1101	0	0
RIMS1	Q86UR5	R71	0	0
RINT1	Q6NUQ1	K85	0	0
RIPPLY2	Q5TAB7	S110	0	0
RIT1	Q92963	M90	0	0
RIT1	Q92963	A77	0	0
RPL10L	Q96L21	K156	0	0
RPTOR	Q8N122	R139	0	0
RQCD1	Q92600	P131	0	0
RQCD1	Q92600	S87	0	0
RSBN1L	Q6PCB5	L432	0	0
RTKN2	Q8IZC4	R33	0	0
S100A3	P33764	P97	0	0
S100A8	P05109	K49	0	0
SESN2	P58004	I425	0	0
SHB	Q15464	A460	0	0
SLC27A5	Q9Y2P5	T554	0	0
SNRPD3	P62318	G96	0	0
SOS1	Q07889	A90	0	0
SOS1	Q07889	N233	0	0
SPRED1	Q7Z699	R349	0	0
SSBP3	Q9BWW4	K6	0	0
STK19	P49842	D89	0	0
TACC3	Q9Y6A5	P417	0	0
TBX2	Q13207	S192	0	0
TCF20	Q9UGU0	P815	0	0
TGFBR1	P36897	I259	0	0
TGFBR1	P36897	R487	0	0
TGFBR1	P36897	T375	0	0
TGFBRAP1	Q8WUH2	P824	0	0
THRA	P10827	R79	0	0
THSD7B	Q9C0I4	G557	0	0
THSD7B	Q9C0I4	E1181	0	0
TMEM147	Q9BVK8	A92	0	0
TOP2B	Q02880	R656	0	0
TRIM65	Q6PJ69	H383	0	0
TROAP	Q12815	S562	0	0
TUBGCP4	Q9UGJ1	A8	0	0
UBXN11	Q5T124	S494	0	0
UCHL1	P09936	H161	0	0
VPS37B	Q9H9H4	Y191	0	0
WDR73	Q6P4I2	G316	0	0
XPO6	Q96QU8	I274	0	0
ZBTB7A	O95365	K424	0	0
ZHX3	Q9H4I2	N249	0	0
ZNF649	Q9BS31	R198	0	0

## Sheet: Interaction_partners
Interaction_partner	Hotspot-affected	Cancer_Gene_Census
ABL1	1	1
ABL2	1	1
ACVR1	1	1
AKT1	1	1
APC	1	1
AR	1	1
ARAF	1	1
ARHGEF12	1	1
ATM	1	1
ATP1A1	1	1
ATR	1	1
ATRX	1	1
AXIN1	1	1
AXIN2	1	1
BAP1	1	1
BAX	1	1
BAZ1A	1	1
BCL10	1	1
BCL2	1	1
BCL9	1	1
BCLAF1	1	1
BCOR	1	1
BCR	1	1
BLM	1	1
BRAF	1	1
BRCA1	1	1
BRCA2	1	1
BTK	1	1
CANT1	1	1
CARD11	1	1
CASP3	1	1
CASP8	1	1
CBL	1	1
CCNB1IP1	1	1
CCND1	1	1
CCND2	1	1
CCNE1	1	1
CDH1	1	1
CDK12	1	1
CDK4	1	1
CDK6	1	1
CDKN1A	1	1
CDKN1B	1	1
CDKN2A	1	1
CDKN2C	1	1
CHEK2	1	1
CIC	1	1
CLTC	1	1
CREB1	1	1
CREBBP	1	1
CTNNA2	1	1
CTNNB1	1	1
CTNND1	1	1
CUX1	1	1
DAXX	1	1
DDIT3	1	1
DDX5	1	1
DICER1	1	1
DNAJB1	1	1
EGFR	1	1
EP300	1	1
EPAS1	1	1
ERBB2	1	1
ERBB3	1	1
ERCC3	1	1
ESR1	1	1
ETV1	1	1
EWSR1	1	1
EZR	1	1
FBXW7	1	1
FEN1	1	1
FES	1	1
FGFR1	1	1
FGFR2	1	1
FGFR3	1	1
FH	1	1
FLNA	1	1
FOXO1	1	1
FOXO3	1	1
GATA2	1	1
GOPC	1	1
H3F3A	1	1
HIF1A	1	1
HLA-A	1	1
HNF1A	1	1
HRAS	1	1
HSP90AA1	1	1
HSP90AB1	1	1
ID3	1	1
IDH1	1	1
IKBKB	1	1
IRS4	1	1
ITK	1	1
JUN	1	1
KDM5A	1	1
KEAP1	1	1
KIT	1	1
KRAS	1	1
KTN1	1	1
LATS1	1	1
LCK	1	1
LEF1	1	1
LMO2	1	1
MAP2K1	1	1
MAP2K4	1	1
MAP3K1	1	1
MAPK1	1	1
MAX	1	1
MDM2	1	1
MET	1	1
MLF1	1	1
MLLT4	1	1
MUC1	1	1
MYC	1	1
MYCN	1	1
MYD88	1	1
MYH9	1	1
MYOD1	1	1
NCOA1	1	1
NCOA2	1	1
NCOR1	1	1
NCOR2	1	1
NOTCH1	1	1
NPM1	1	1
NRAS	1	1
NRG1	1	1
PAFAH1B2	1	1
PAX8	1	1
PDE4DIP	1	1
PDGFRA	1	1
PIK3CA	1	1
PIK3CB	1	1
PIK3R1	1	1
PIM1	1	1
PLAG1	1	1
PLCG1	1	1
PML	1	1
PPARG	1	1
PPP2R1A	1	1
PRKAR1A	1	1
PTEN	1	1
PTPN11	1	1
PTPN6	1	1
PTPRB	1	1
PTPRC	1	1
PTPRK	1	1
RABEP1	1	1
RAC1	1	1
RAF1	1	1
RALGDS	1	1
RAP1GDS1	1	1
RB1	1	1
RFWD3	1	1
RNF43	1	1
RUNX1	1	1
SETD1B	1	1
SETD2	1	1
SETDB1	1	1
SFPQ	1	1
SH2B3	1	1
SMAD2	1	1
SMAD3	1	1
SMAD4	1	1
SMARCA4	1	1
SMARCD1	1	1
SOCS1	1	1
SPOP	1	1
SRC	1	1
STAG1	1	1
STAT3	1	1
STAT6	1	1
STK11	1	1
SUZ12	1	1
SYK	1	1
TCF7L2	1	1
TCL1A	1	1
TEC	1	1
TP53	1	1
TP63	1	1
TRIM24	1	1
TRIM27	1	1
TRIM33	1	1
TRRAP	1	1
UBR5	1	1
VAV1	1	1
VHL	1	1
WHSC1L1	1	1
WRN	1	1
ZBTB16	1	1
ZMYM3	1	1
A8K147	1	0
AARSD1	1	0
AATF	1	0
ABTB1	1	0
ACAT2	1	0
ACSM5	1	0
ACTB	1	0
ACTN4	1	0
ACVR1B	1	0
ADH6	1	0
AES	1	0
AGO1	1	0
AGO2	1	0
AGR3	1	0
AHR	1	0
AIMP2	1	0
AJUBA	1	0
AKAP13	1	0
ALOX5	1	0
ANAPC2	1	0
ANG	1	0
ANGPTL4	1	0
ANK3	1	0
ANKRD28	1	0
ANKS1A	1	0
ANLN	1	0
ANTXR2	1	0
ANXA1	1	0
ANXA3	1	0
ANXA6	1	0
ANXA7	1	0
AP1B1	1	0
AP2A1	1	0
AP2B1	1	0
AP4S1	1	0
APBA3	1	0
APBB1	1	0
APBB2	1	0
APBB3	1	0
APEX1	1	0
APOA1	1	0
APOB	1	0
APOE	1	0
APOH	1	0
APP	1	0
APPL1	1	0
ARAP1	1	0
ARFGAP3	1	0
ARFIP2	1	0
ARFRP1	1	0
ARHG	1	0
ARHGAP1	1	0
ARHGAP20	1	0
ARHGAP31	1	0
ARHGAP33	1	0
ARHGDIA	1	0
ARHGDIB	1	0
ARHGEF1	1	0
ARHGEF11	1	0
ARHGEF15	1	0
ARHGEF4	1	0
ARHGEF6	1	0
ARHGEF7	1	0
ARHGEF9	1	0
ARIH2	1	0
ARL13B	1	0
ARL2BP	1	0
ARL3	1	0
ARL4D	1	0
ARL5A	1	0
ARL5B	1	0
ARL6IP1	1	0
ARL8B	1	0
ARRB1	1	0
ARRB2	1	0
ARSF	1	0
ASF1A	1	0
ASF1B	1	0
ASH1L	1	0
ATAD2	1	0
ATF2	1	0
ATF3	1	0
ATF4	1	0
ATF5	1	0
ATF7IP	1	0
ATG5	1	0
ATP1B1	1	0
ATP5C1	1	0
ATP6AP1	1	0
ATP6V1G1	1	0
ATXN1	1	0
AURKA	1	0
AURKB	1	0
B3KNU0	1	0
B4DT73	1	0
B4DYC6	1	0
B7Z2P9	1	0
BAD	1	0
BAG1	1	0
BAG2	1	0
BAG6	1	0
BAI1	1	0
BAIAP2	1	0
BAIAP3	1	0
BAK1	1	0
BANP	1	0
BATF3	1	0
BCAR3	1	0
BCAS2	1	0
BCAS3	1	0
BCKDK	1	0
BCL2A1	1	0
BCL2L1	1	0
BCL2L2	1	0
BEX1	1	0
BEX2	1	0
BIK	1	0
BLID	1	0
BLK	1	0
BLMH	1	0
BLNK	1	0
BLZF1	1	0
BMI1	1	0
BMP1	1	0
BMPR2	1	0
BMX	1	0
BORA	1	0
BPGM	1	0
BRD7	1	0
BRINP1	1	0
BRPF1	1	0
BTBD2	1	0
BTRC	1	0
C-FGR	1	0
C1R	1	0
C22ORF46	1	0
C2ORF44	1	0
C2ORF88	1	0
C4BPA	1	0
C6ORF47	1	0
C7ORF25	1	0
CAB39	1	0
CACNA1A	1	0
CACYBP	1	0
CAD	1	0
CADPS2	1	0
CALM1	1	0
CAMK2D	1	0
CAMLG	1	0
CAPN1	1	0
CAPNS1	1	0
CARM1	1	0
CASC3	1	0
CASK	1	0
CASP2	1	0
CASP7	1	0
CAT	1	0
CAV1	1	0
CAV2	1	0
CBLL1	1	0
CBX5	1	0
CCDC106	1	0
CCDC17	1	0
CCDC36	1	0
CCDC85B	1	0
CCDC88A	1	0
CCL18	1	0
CCL5	1	0
CCNB1	1	0
CCNH	1	0
CCT5	1	0
CCT7	1	0
CD2	1	0
CD59	1	0
CDAN1	1	0
CDC23	1	0
CDC25A	1	0
CDC25C	1	0
CDC27	1	0
CDC37	1	0
CDC40	1	0
CDC42	1	0
CDC45	1	0
CDC5L	1	0
CDC6	1	0
CDC7	1	0
CDH13	1	0
CDH2	1	0
CDH5	1	0
CDK1	1	0
CDK14	1	0
CDK2	1	0
CDK3	1	0
CDK5R1	1	0
CDK9	1	0
CDKN2AIP	1	0
CDKN2B	1	0
CDKN2D	1	0
CEBPB	1	0
CEBPD	1	0
CENPC	1	0
CENPT	1	0
CEP126	1	0
CEP63	1	0
CFAP36	1	0
CFH	1	0
CFL1	1	0
CFLAR	1	0
CHAF1A	1	0
CHD3	1	0
CHEK1	1	0
CHFR	1	0
CHGB	1	0
CHN1	1	0
CHN2	1	0
CHRD	1	0
CHUK	1	0
CISH	1	0
CIT	1	0
CLASRP	1	0
CLCN6	1	0
CLIP2	1	0
CLNK	1	0
CLU	1	0
CNKSR1	1	0
CNOT4	1	0
COG5	1	0
COIII	1	0
COMMD1	1	0
COPS5	1	0
COPS6	1	0
COX17	1	0
CPSF7	1	0
CRELD2	1	0
CRK	1	0
CRKL	1	0
CSH2	1	0
CSN2	1	0
CSNK2A1	1	0
CSNK2B	1	0
CSRP1	1	0
CSRP3	1	0
CTNNA1	1	0
CTNNBIP1	1	0
CTPS2	1	0
CTSK	1	0
CUL1	1	0
CUL5	1	0
CUL7	1	0
CUL9	1	0
CXCL1	1	0
CYB	1	0
CYFIP2	1	0
CYP11A1	1	0
CYP17A1	1	0
D2HGDH	1	0
DAAM1	1	0
DAB1	1	0
DAO	1	0
DAPP1	1	0
DCAF6	1	0
DCN	1	0
DCP1A	1	0
DCP1B	1	0
DDX19A	1	0
DDX47	1	0
DDX50	1	0
DDX54	1	0
DEAF1	1	0
DECR2	1	0
DIAPH1	1	0
DIPLA1	1	0
DIRAS3	1	0
DKFZP434G2016	1	0
DKFZP434N041	1	0
DKFZP434N101	1	0
DKFZP451F1115	1	0
DKFZP451O0517	1	0
DKFZP666O0110	1	0
DKFZP686H01244	1	0
DKFZP686L11144	1	0
DKFZP686M02159	1	0
DKFZP686N0152	1	0
DKFZP761H172	1	0
DKFZP781O1323	1	0
DKK3	1	0
DLEU1	1	0
DLG1	1	0
DLG3	1	0
DLG4	1	0
DNAJA3	1	0
DNAJB11	1	0
DNAJB2	1	0
DNAJB5	1	0
DNAJC7	1	0
DNCL1	1	0
DNMT1	1	0
DNMT3B	1	0
DOCK1	1	0
DOCK2	1	0
DOCK8	1	0
DOK1	1	0
DOK4	1	0
DOK5	1	0
DOK6	1	0
DPP3	1	0
DPPA2	1	0
DPY30	1	0
DTX3L	1	0
DUT	1	0
DVL2	1	0
DYNC1H1	1	0
DYNLL1	1	0
DYRK1B	1	0
DZIP3	1	0
E2F1	1	0
E2F4	1	0
E2F5	1	0
E9KL35	1	0
EAF2	1	0
ECH1	1	0
EDG2	1	0
EEA1	1	0
EEF1A1	1	0
EFNB3	1	0
EGLN1	1	0
EGR1	1	0
EHMT1	1	0
EID1	1	0
EIF2S2	1	0
EIF3L	1	0
ENO1	1	0
EPO	1	0
EPRS	1	0
EPS8	1	0
EPSTI1	1	0
ERBB2IP	1	0
ERH	1	0
ERLEC1	1	0
ERRFI1	1	0
ETF1	1	0
ETS1	1	0
FADD	1	0
FAM101A	1	0
FAM117B	1	0
FAM161B	1	0
FAM173A	1	0
FAM46A	1	0
FAM65B	1	0
FAM84B	1	0
FANCL	1	0
FBLN1	1	0
FBN2	1	0
FBXL5	1	0
FBXO25	1	0
FBXO3	1	0
FBXO30	1	0
FBXO34	1	0
FCAMR	1	0
FCHO1	1	0
FEM1C	1	0
FGD6	1	0
FGF1	1	0
FGF10	1	0
FGF2	1	0
FGF23	1	0
FGF8	1	0
FGL1	1	0
FGR	1	0
FKBP1A	1	0
FKBP1B	1	0
FKBP4	1	0
FKBP5	1	0
FKBPL	1	0
FLJ00340	1	0
FLJ00380	1	0
FLJ10324	1	0
FLJ23584	1	0
FLYWCH1	1	0
FN1	1	0
FOCAD	1	0
FOS	1	0
FOXH1	1	0
FXYD6	1	0
G4	1	0
GAA	1	0
GAB1	1	0
GADD45A	1	0
GADD45GIP1	1	0
GAPDH	1	0
GATAD2B	1	0
GCC1	1	0
GFER	1	0
GFI1B	1	0
GGA1	1	0
GIT1	1	0
GIT2	1	0
GK	1	0
GLCE	1	0
GLI3	1	0
GLRX3	1	0
GLRX5	1	0
GMNN	1	0
GMPR2	1	0
GNPDA1	1	0
GOLGA2	1	0
GPERIK	1	0
GPNMB	1	0
GPSM3	1	0
GPX2	1	0
GRAP2	1	0
GRB10	1	0
GRB2	1	0
GRB7	1	0
GREB1	1	0
GRIP1	1	0
GRN	1	0
GSK3A	1	0
GSK3B	1	0
GSTM4	1	0
GTF2H1	1	0
GTF2H2	1	0
GTF2H2C	1	0
GTF2H3	1	0
GTF2I	1	0
GTF3C1	1	0
GUSBP1	1	0
GYPA	1	0
H2AFY	1	0
HACE1	1	0
HAUS1	1	0
HBA1	1	0
HBP1	1	0
HBZ	1	0
HDAC1	1	0
HDAC6	1	0
HDAC7	1	0
HDGF	1	0
HDLBP	1	0
HEL-S-1	1	0
HEL-S-162EP	1	0
HEL-S-303	1	0
HEL-S-45	1	0
HEL-S-47E	1	0
HEL-S-72	1	0
HEL-S-72P	1	0
HEL-S-91N	1	0
HEL112	1	0
HEL117	1	0
HEL25	1	0
HINFP	1	0
HIPK2	1	0
HIST1H1A	1	0
HIST1H2AB	1	0
HIST1H2BB	1	0
HIST1H3A	1	0
HIST1H4A	1	0
HIST2H2AB	1	0
HIST2H2AC	1	0
HIST2H2BE	1	0
HIST3H3	1	0
HIVEP1	1	0
HMG20A	1	0
HMGN1	1	0
HNRNPC	1	0
HNRNPL	1	0
HNRNPU	1	0
HNRNPUL1	1	0
HOXB13	1	0
HOXC6	1	0
HPS4	1	0
HPS6	1	0
HRK	1	0
HSF2	1	0
HSH2D	1	0
HSPA1A	1	0
HSPA1B	1	0
HSPA4	1	0
HSPA8	1	0
HSPA9	1	0
HSPB1	1	0
HTT	1	0
HUWE1	1	0
IARS	1	0
ID1	1	0
ID2	1	0
IFI16	1	0
IFRD1	1	0
IGBP1	1	0
IGSF21	1	0
IKBKG	1	0
IKZF3	1	0
IL13RA2	1	0
IL1RAP	1	0
IL24	1	0
IL3RA	1	0
ILKAP	1	0
IMMT	1	0
INPPL1	1	0
IPO13	1	0
IPO4	1	0
IQGAP1	1	0
IRAK2	1	0
IRS1	1	0
ITCH	1	0
ITGB2	1	0
ITIH3	1	0
ITSN2	1	0
JADE1	1	0
JDP2	1	0
JTB	1	0
JUNB	1	0
JUP	1	0
KANSL1	1	0
KAT2A	1	0
KAT2B	1	0
KAT5	1	0
KCTD5	1	0
KDM1A	1	0
KDM2A	1	0
KHDRBS1	1	0
KIAA0087	1	0
KIAA1033	1	0
KIAA1107	1	0
KIF1A	1	0
KIFC3	1	0
KLHDC2	1	0
KLK5	1	0
KLK7	1	0
KLK9	1	0
KMT2B	1	0
KPNA3	1	0
KPNA4	1	0
KPNA6	1	0
KPNB1	1	0
KRT18	1	0
KRT40	1	0
KRT8	1	0
LAMA4	1	0
LAMA5	1	0
LAMP1	1	0
LAMTOR5	1	0
LAT	1	0
LBP	1	0
LCP2	1	0
LHX9	1	0
LINGO1	1	0
LITAF	1	0
LMO4	1	0
LPAR1	1	0
LRIF1	1	0
LSM3	1	0
LSM8	1	0
LTBP3	1	0
LTBP4	1	0
LUC7L2	1	0
LYPD3	1	0
LZTS2	1	0
MAD1L1	1	0
MAD2L1	1	0
MAD2L1BP	1	0
MAFG	1	0
MAFK	1	0
MAGEA11	1	0
MAGEA2	1	0
MAGEB18	1	0
MAGED1	1	0
MAGI1	1	0
MAP2K3	1	0
MAP3K2	1	0
MAP3K3	1	0
MAP3K4	1	0
MAP3K5	1	0
MAP3K7	1	0
MAP3K7IP1	1	0
MAP4K1	1	0
MAPK12	1	0
MAPK13	1	0
MAPK14	1	0
MAPK8	1	0
MAPK8IP1	1	0
MAPK8IP2	1	0
MAPK9	1	0
MAPKAPK2	1	0
MAPKAPK3	1	0
MAPKBP1	1	0
MAPRE1	1	0
MAPT	1	0
MBD1	1	0
MCL1	1	0
MCM10	1	0
MCM2	1	0
MCM3AP	1	0
MCM5	1	0
MCM7	1	0
MDFI	1	0
MED1	1	0
MEX3B	1	0
MGA	1	0
MLF2	1	0
MMS22L	1	0
MNAT1	1	0
MOCS2	1	0
MORF4L1	1	0
MPHOSPH6	1	0
MPRIP	1	0
MSTO1	1	0
MT-CO3	1	0
MT-CYB	1	0
MTA3	1	0
MTCH1	1	0
MTCH2	1	0
MTF2	1	0
MTUS2	1	0
MUCL1	1	0
MUS81	1	0
MXD1	1	0
MXD3	1	0
MXD4	1	0
MXI1	1	0
MYL6	1	0
MYO9B	1	0
NAA20	1	0
NAGK	1	0
NAP1L1	1	0
NASP	1	0
NAT2	1	0
NAT8	1	0
NBLA10317	1	0
NCF1	1	0
NCF2	1	0
NCK1	1	0
NCK2	1	0
NCL	1	0
NCOA3	1	0
NCOA6	1	0
NDN	1	0
NDUFS6	1	0
NEDD4	1	0
NEDD4L	1	0
NEDD9	1	0
NEK2	1	0
NEK6	1	0
NEK8	1	0
NELFCD	1	0
NET1	1	0
NFE2	1	0
NFE2L1	1	0
NFKB1	1	0
NFKBIB	1	0
NIF3L1	1	0
NINL	1	0
NLK	1	0
NOS2	1	0
NOXA1	1	0
NPPA	1	0
NPY5R	1	0
NR0B2	1	0
NR1C1	1	0
NR1I1	1	0
NR1I2	1	0
NR1I3	1	0
NR2B1	1	0
NR3C1	1	0
NR3C4	1	0
NR4A1	1	0
NR5A2	1	0
NRIP1	1	0
NTRK2	1	0
NUAK2	1	0
NUCB1	1	0
NUCB2	1	0
NUDC	1	0
NUDCD2	1	0
NUDCD3	1	0
NUDT4	1	0
NUMB	1	0
NUMBL	1	0
NXT2	1	0
OCLN	1	0
ODF2L	1	0
OGDHL	1	0
ORC4	1	0
ORC5	1	0
ORC5L	1	0
OS9	1	0
OSGIN1	1	0
OXR1	1	0
PA2G4	1	0
PAFAH1B3	1	0
PAK1	1	0
PAK2	1	0
PAPOLA	1	0
PAPPA	1	0
PAPPA2	1	0
PARK2	1	0
PARP1	1	0
PARP4	1	0
PAXIP1	1	0
PBK	1	0
PC4	1	0
PCBD1	1	0
PCBD2	1	0
PCDH1	1	0
PCDHA4	1	0
PCK2	1	0
PDCD5	1	0
PDCD6IP	1	0
PDE6D	1	0
PDK1	1	0
PDPK1	1	0
PEA15	1	0
PEX19	1	0
PGR	1	0
PHB	1	0
PHB2	1	0
PHC2	1	0
PHF23	1	0
PIAS1	1	0
PIAS2	1	0
PIAS4	1	0
PIDD1	1	0
PIK3C2B	1	0
PIK3CD	1	0
PIK3CG	1	0
PIK3R2	1	0
PIK3R3	1	0
PIN1	1	0
PKIA	1	0
PKN1	1	0
PLA2G12A	1	0
PLCB1	1	0
PLCG2	1	0
PLD3	1	0
PLEK	1	0
PLEKHA5	1	0
PLEKHB1	1	0
PLEKHF2	1	0
PLEKHJ1	1	0
PLG	1	0
PLIN3	1	0
PLK1	1	0
PLK3	1	0
PLK4	1	0
PLSCR1	1	0
PLSCR2	1	0
PMF1	1	0
PNN	1	0
PNP	1	0
PNRC2	1	0
POLA2	1	0
POLD2	1	0
POLR1B	1	0
POLR2G	1	0
POLR2L	1	0
PP2150	1	0
PPA1	1	0
PPARA	1	0
PPARD	1	0
PPM1A	1	0
PPP1CA	1	0
PPP1R12C	1	0
PPP1R13L	1	0
PPP2R1B	1	0
PPP2R2B	1	0
PPP2R2D	1	0
PPP2R3A	1	0
PPP2R3B	1	0
PPP2R4	1	0
PPP2R5A	1	0
PPP2R5D	1	0
PPP5C	1	0
PPP6R1	1	0
PPP6R2	1	0
PPP6R3	1	0
PRDM14	1	0
PRDM4	1	0
PRDX4	1	0
PREX1	1	0
PRKAA1	1	0
PRKAA2	1	0
PRKAB2	1	0
PRKAG1	1	0
PRKCA	1	0
PRKCE	1	0
PRKCQ	1	0
PRKCZ	1	0
PRKD2	1	0
PRKDC	1	0
PRKRA	1	0
PRMT1	1	0
PRMT2	1	0
PRMT5	1	0
PRMT6	1	0
PRMT8	1	0
PROC	1	0
PROX1	1	0
PRPF40A	1	0
PRSS23	1	0
PS1TP5BP1	1	0
PSAP	1	0
PSAT1	1	0
PSEN1	1	0
PSG11S'	1	0
PSG2	1	0
PSG9	1	0
PSMA3	1	0
PSMC3IP	1	0
PSMC5	1	0
PSMD11	1	0
PSMD2	1	0
PSMD8	1	0
PSME2	1	0
PTGDS	1	0
PTK2	1	0
PTMA	1	0
PTMAP7	1	0
PTN	1	0
PTPN1	1	0
PTPN12	1	0
PTPN18	1	0
PTPN22	1	0
PTPN3	1	0
PTPRF	1	0
PTPRG	1	0
PTPRJ	1	0
PTPRO	1	0
PTPRZ1	1	0
Q13746	1	0
Q14419	1	0
Q16089	1	0
Q53FC7	1	0
Q53HG7	1	0
Q59EA3	1	0
Q59EF7	1	0
Q59FG2	1	0
Q59GK3	1	0
Q59GY7	1	0
Q6U7G8	1	0
Q7L4M3	1	0
Q7Z4F3	1	0
Q7Z4P3	1	0
Q86SX1	1	0
Q8HHH1	1	0
Q8N4Y1	1	0
Q8NAK2	1	0
Q8NBH6	1	0
Q8NC59	1	0
Q8TAS0	1	0
Q8WVM9	1	0
Q96BA7	1	0
Q96BE0	1	0
Q96EL6	1	0
Q96FS5	1	0
Q9BSD8	1	0
Q9H2B0	1	0
Q9HA84	1	0
Q9NRC3	1	0
Q9P0T0	1	0
Q9UBT1	1	0
Q9UII7	1	0
Q9UQS6	1	0
Q9Y3L8	1	0
QDPR	1	0
RAA1	1	0
RAB13	1	0
RAB17	1	0
RAB25	1	0
RAB2B	1	0
RAB34	1	0
RAB3B	1	0
RAB4A	1	0
RAB6B	1	0
RABAC1	1	0
RABGAP1L	1	0
RAC2	1	0
RACK1	1	0
RAD51	1	0
RADIL	1	0
RAI1	1	0
RALA	1	0
RANBP6	1	0
RANBP9	1	0
RAP1B	1	0
RAP2A	1	0
RAPGEF1	1	0
RARB	1	0
RASA1	1	0
RASA4	1	0
RASD2	1	0
RASL10B	1	0
RASL12	1	0
RASSF5	1	0
RBBP4	1	0
RBBP7	1	0
RBBP8	1	0
RBM39	1	0
RBMX	1	0
RBPMS	1	0
RBX1	1	0
RCC1	1	0
RCHY1	1	0
RCN2	1	0
RECK	1	0
RELA	1	0
RFWD2	1	0
RFX1	1	0
RGL2	1	0
RGS14	1	0
RGS3	1	0
RGS4	1	0
RHEBL1	1	0
RHOBTB1	1	0
RHOBTB2	1	0
RHOD	1	0
RHOJ	1	0
RIC8A	1	0
RIF1	1	0
RIN1	1	0
RIN2	1	0
RIN3	1	0
RIOK2	1	0
RIOK3	1	0
RIPK2	1	0
RMND5B	1	0
RNF10	1	0
RNF111	1	0
RNF123	1	0
RNF130	1	0
RNF138	1	0
RNF14	1	0
RNF31	1	0
RNPC3	1	0
ROCK1	1	0
RPA1	1	0
RPA2	1	0
RPL11	1	0
RPL27	1	0
RPL28	1	0
RPL8	1	0
RPN2	1	0
RPS20	1	0
RPS6KA5	1	0
RPS6KA6	1	0
RPS6KB1	1	0
RPS9	1	0
RRAS2	1	0
RRM2B	1	0
RSPH14	1	0
RTKN	1	0
RTN3	1	0
RUTBC1	1	0
RUVBL2	1	0
RXRA	1	0
RXRB	1	0
S100A14	1	0
S100A4	1	0
S100A8	1	0
SAP130	1	0
SASH3	1	0
SAT1	1	0
SAT2	1	0
SAV1	1	0
SBF1	1	0
SCAMP1	1	0
SCGB3A1	1	0
SECISBP2L	1	0
SEPP1	1	0
SERPINA1	1	0
SERPINA5	1	0
SERPINB5	1	0
SERPINB9	1	0
SERTAD1	1	0
SETD1A	1	0
SEZ6L2	1	0
SFN	1	0
SGSM2	1	0
SH2B1	1	0
SH2B2	1	0
SH2D1A	1	0
SH2D1B	1	0
SH2D2A	1	0
SH2D3A	1	0
SH2D3C	1	0
SH2D5	1	0
SH3BP2	1	0
SH3GL2	1	0
SH3GL3	1	0
SH3RF1	1	0
SHB	1	0
SHC1	1	0
SHC2	1	0
SHC3	1	0
SHC4	1	0
SHD	1	0
SHOC2	1	0
SHPRH	1	0
SIAH1	1	0
SIAH2	1	0
SIN3A	1	0
SIRT1	1	0
SIRT2	1	0
SKP1	1	0
SKP2	1	0
SLA	1	0
SLA2	1	0
SLC25A6	1	0
SLC9A3R1	1	0
SMAD1	1	0
SMAD5	1	0
SMAD7	1	0
SMAD9	1	0
SMARCC1	1	0
SMG7	1	0
SMN1	1	0
SMS	1	0
SMURF1	1	0
SMURF2	1	0
SNAPIN	1	0
SNCA	1	0
SNCB	1	0
SNRNP70	1	0
SNRPN	1	0
SNUPN	1	0
SNURF	1	0
SNW1	1	0
SNX1	1	0
SNX26	1	0
SNX31	1	0
SNX9	1	0
SOCS2	1	0
SOCS3	1	0
SOCS4	1	0
SOCS5	1	0
SOCS6	1	0
SOS1	1	0
SOS2	1	0
SOX12	1	0
SP1	1	0
SP100	1	0
SPI1	1	0
SQSTM1	1	0
SREBF1	1	0
SRF	1	0
SRI	1	0
SRR	1	0
SRRM1	1	0
ST13	1	0
ST5	1	0
STAP1	1	0
STAP2	1	0
STAT1	1	0
STAT2	1	0
STAT5A	1	0
STIP1	1	0
STK11IP	1	0
STK24	1	0
STK3	1	0
STK35	1	0
STK4	1	0
STMN1	1	0
STRADA	1	0
STRADB	1	0
STUB1	1	0
STX5	1	0
STX8	1	0
SULT1E1	1	0
SULT2A1	1	0
SULT4A1	1	0
SUMF2	1	0
SUMO1	1	0
SUPT16H	1	0
SUPT6H	1	0
SUV39H1	1	0
SVEP1	1	0
SYNJ2	1	0
TAB1	1	0
TAB2	1	0
TAF1	1	0
TAF1D	1	0
TAF9	1	0
TAX1BP3	1	0
TBC1D1	1	0
TBL1X	1	0
TCEAL2	1	0
TCEB1	1	0
TCEB2	1	0
TCF4	1	0
TDG	1	0
TDRD7	1	0
TENM3	1	0
TERF1	1	0
TERF2IP	1	0
TF	1	0
TFF1	1	0
TFIP11	1	0
TGFBR1	1	0
TGM2	1	0
THAP8	1	0
THEM4	1	0
THPO	1	0
THRA	1	0
THRB	1	0
THRSP	1	0
TIAM1	1	0
TINAGL1	1	0
TK1	1	0
TLE1	1	0
TLE4	1	0
TLN1	1	0
TLR2	1	0
TLR3	1	0
TLR4	1	0
TM9SF2	1	0
TMPRSS3	1	0
TMSB4X	1	0
TNFRSF1A	1	0
TNFSF11	1	0
TNFSF13	1	0
TNIP2	1	0
TNNT1	1	0
TNS1	1	0
TNS2	1	0
TNS3	1	0
TNS4	1	0
TOPORS	1	0
TP53BP1	1	0
TP53BP2	1	0
TP53TG1	1	0
TP73	1	0
TPSAB1	1	0
TPSB2	1	0
TPT1	1	0
TRAF1	1	0
TRAF2	1	0
TRAF6	1	0
TRAM1	1	0
TRAP1	1	0
TRIM2	1	0
TRIM25	1	0
TRIM26	1	0
TRIM31	1	0
TRIM35	1	0
TRIM42	1	0
TRIM43	1	0
TRIM5	1	0
TRIM62	1	0
TRIO	1	0
TRIP4	1	0
TRIP6	1	0
TSC22D4	1	0
TSG101	1	0
TSNAX	1	0
TSSK3	1	0
TTC17	1	0
TTC27	1	0
TTC9B	1	0
TUBA1A	1	0
TUBB	1	0
TUFM	1	0
TWIST1	1	0
TXK	1	0
TXLNG	1	0
TXN	1	0
UBA1	1	0
UBA52	1	0
UBB	1	0
UBC	1	0
UBE2B	1	0
UBE2D2	1	0
UBE2D3	1	0
UBE2E3	1	0
UBE2I	1	0
UBE2L3	1	0
UBE2Z	1	0
UBE3A	1	0
UBE4B	1	0
UBQLN1	1	0
UBQLN4	1	0
UBXN1	1	0
UFD1	1	0
UFD1L	1	0
UHMK1	1	0
UHRF2	1	0
UNC45A	1	0
UNC45B	1	0
UQCRC1	1	0
USB1	1	0
USH1C	1	0
USP13	1	0
USP21	1	0
USP33	1	0
USP39	1	0
USP7	1	0
UTP14A	1	0
UTP18	1	0
VAV2	1	0
VAV3	1	0
VBP1	1	0
VCAM1	1	0
VDR	1	0
VEPH1	1	0
VPS18	1	0
VPS72	1	0
VRK1	1	0
VWF	1	0
WAC	1	0
WASF3	1	0
WASL	1	0
WDR33	1	0
WDR59	1	0
WDR61	1	0
WDR83	1	0
WDR97	1	0
WEE1	1	0
WNK1	1	0
WSB1	1	0
WSB2	1	0
WWOX	1	0
WWP1	1	0
XBP1	1	0
XPO5	1	0
XPO7	1	0
XRCC6	1	0
YEATS2	1	0
YES1	1	0
YWHAB	1	0
YWHAG	1	0
YWHAQ	1	0
YWHAZ	1	0
YY1	1	0
ZAK	1	0
ZBED5	1	0
ZBTB3	1	0
ZC3H12A	1	0
ZC3HC1	1	0
ZCCHC10	1	0
ZCCHC14	1	0
ZDHHC17	1	0
ZEB2	1	0
ZFYVE9	1	0
ZHX1	1	0
ZMYM2	1	0
ZMYND11	1	0
ZNF133	1	0
ZNF24	1	0
ZNF251	1	0
ZNF329	1	0
ZNF41	1	0
ZNF512B	1	0
ZNF8	1	0
ZNF83	1	0
ZNHIT6	1	0
ZSCAN32	1	0
ACVR2A	0	1
AKAP9	0	1
ALK	0	1
AMER1	0	1
ARID1A	0	1
ARID1B	0	1
ARID2	0	1
ASPSCR1	0	1
ASXL1	0	1
BARD1	0	1
BCL6	0	1
BIRC3	0	1
BRD3	0	1
BRD4	0	1
CALR	0	1
CASP9	0	1
CBFB	0	1
CBLB	0	1
CCDC6	0	1
CCNC	0	1
CCND3	0	1
CD28	0	1
CDC73	0	1
CDH10	0	1
CEBPA	0	1
CHIC2	0	1
CNBP	0	1
CNOT3	0	1
COX6C	0	1
CREB3L1	0	1
CSF1R	0	1
CUL3	0	1
CYP2C8	0	1
DCTN1	0	1
DDX6	0	1
EED	0	1
ERBB4	0	1
ERG	0	1
EXT2	0	1
EZH2	0	1
FANCA	0	1
FANCD2	0	1
FANCG	0	1
FAS	0	1
FGFR4	0	1
FLI1	0	1
FLT3	0	1
FLT4	0	1
FOXO4	0	1
FUBP1	0	1
GATA1	0	1
GATA3	0	1
GNAQ	0	1
GNAS	0	1
GRIN2A	0	1
HEY1	0	1
HLF	0	1
HMGA1	0	1
HOXC11	0	1
IDH2	0	1
IKZF1	0	1
IL6ST	0	1
IL7R	0	1
JAK1	0	1
JAK2	0	1
JAK3	0	1
KAT6A	0	1
KAT7	0	1
KDR	0	1
KIF5B	0	1
KMT2C	0	1
LASP1	0	1
LMNA	0	1
LZTR1	0	1
MALT1	0	1
MAP2K2	0	1
MAP3K13	0	1
MLH1	0	1
MLLT3	0	1
MSH2	0	1
MTOR	0	1
MYB	0	1
MYH11	0	1
NACA	0	1
NBN	0	1
NCOA4	0	1
NFE2L2	0	1
NKX2-1	0	1
NUP214	0	1
NUP98	0	1
OLIG2	0	1
PABPC1	0	1
PALB2	0	1
PBRM1	0	1
PCBP1	0	1
PCM1	0	1
PDGFB	0	1
PDGFRB	0	1
POLE	0	1
POU2AF1	0	1
PPM1D	0	1
PPP6C	0	1
PRCC	0	1
PRKCB	0	1
PTK6	0	1
QKI	0	1
RAD51B	0	1
RANBP2	0	1
RARA	0	1
RBM10	0	1
REL	0	1
RET	0	1
RHOA	0	1
RHOH	0	1
RNF213	0	1
RPL5	0	1
RUNX1T1	0	1
SDHB	0	1
SEPT9	0	1
SF3B1	0	1
SGK1	0	1
SKI	0	1
SMARCB1	0	1
SMARCE1	0	1
SMC1A	0	1
SOX2	0	1
SPEN	0	1
SRSF2	0	1
SRSF3	0	1
SS18	0	1
SS18L1	0	1
STAT5B	0	1
STRN	0	1
TAL1	0	1
TBX3	0	1
TCF12	0	1
TCF3	0	1
TERT	0	1
TFG	0	1
TFPT	0	1
TGFBR2	0	1
TNFRSF14	0	1
TPM3	0	1
TPR	0	1
TSC2	0	1
U2AF1	0	1
WHSC1	0	1
WIF1	0	1
XPO1	0	1
YWHAE	0	1
A0A024RA76	0	0
A1BG	0	0
A2M	0	0
A8K8G8	0	0
A8K932	0	0
ABCF3	0	0
ABCG5	0	0
ABHD16A	0	0
ABI3	0	0
ABLIM1	0	0
ACTL6A	0	0
ACTL6B	0	0
ACTN1	0	0
ACTR1B	0	0
ACVRL1	0	0
ADAMTS10	0	0
ADAMTS2	0	0
ADAMTSL4	0	0
ADGRL1	0	0
ADH5	0	0
ADHFE1	0	0
ADIPOR1	0	0
ADRB1	0	0
AEN	0	0
AGFG1	0	0
AGR2	0	0
AGTRAP	0	0
AHCTF1	0	0
AHSG	0	0
AIP	0	0
AIRE	0	0
AK4	0	0
AK8	0	0
AKAP2	0	0
AKAP6	0	0
AKT1S1	0	0
AKTIP	0	0
ALAS1	0	0
ALKBH3	0	0
ALS2CR12	0	0
AMBP	0	0
AMFR	0	0
AMOT	0	0
AMOTL2	0	0
AMPH	0	0
AMY2A	0	0
ANAPC11	0	0
ANAPC5	0	0
ANGPT2	0	0
ANKEF1	0	0
ANKRD11	0	0
ANKRD17	0	0
ANKRD36BP1	0	0
ANKS1B	0	0
ANP32A	0	0
ANP32B	0	0
AP1M1	0	0
AP2M1	0	0
APEX2	0	0
APLP1	0	0
APLP2	0	0
APMAP	0	0
APOA5	0	0
APOBEC3G	0	0
APOL5	0	0
APPBP2	0	0
APPL2	0	0
ARG2	0	0
ARHGAP15	0	0
ARIH1	0	0
ARL15	0	0
ARL6IP4	0	0
ARMC7	0	0
ARNT2	0	0
ASAP1	0	0
ASAP2	0	0
ASB8	0	0
ASB9	0	0
ASCC2	0	0
ASCC3L1	0	0
ASH2L	0	0
ASL	0	0
ATF7	0	0
ATG13	0	0
ATG16L1	0	0
ATN1	0	0
ATP1A3	0	0
ATP5B	0	0
ATP6V1A	0	0
ATP6V1D	0	0
ATP6V1E1	0	0
ATP6V1F	0	0
ATP6V1H	0	0
ATPAF2	0	0
ATPIF1	0	0
ATXN3	0	0
AXL	0	0
B3KQM1	0	0
B3KSG3	0	0
B4DDV3	0	0
B4DET5	0	0
B4DXH2	0	0
B4E1C1	0	0
B4E318	0	0
B7Z3H9	0	0
B7Z8L6	0	0
BAALC	0	0
BACH2	0	0
BAG4	0	0
BATF	0	0
BATF2	0	0
BBC3	0	0
BCAP31	0	0
BCCIP	0	0
BCL2L10	0	0
BCL2L11	0	0
BECN1	0	0
BEND7	0	0
BFAR	0	0
BHLHB2	0	0
BHLHE40	0	0
BICD1	0	0
BID	0	0
BIRC2	0	0
BIRC8	0	0
BLOC1S1	0	0
BMF	0	0
BMPR1B	0	0
BNIP2	0	0
BNIP3	0	0
BNIP3L	0	0
BRIX1	0	0
BRPF3	0	0
BRWD1	0	0
BTBD10	0	0
BUB3	0	0
BUD31	0	0
BYSL	0	0
BZRAP1	0	0
C10ORF54	0	0
C11ORF57	0	0
C14ORF1	0	0
C1ORF109	0	0
C1ORF123	0	0
C1ORF174	0	0
C1ORF94	0	0
C1QTNF9	0	0
C4A	0	0
C4ORF17	0	0
C5ORF30	0	0
C6ORF165	0	0
C8ORF30A	0	0
C8ORF33	0	0
CA2	0	0
CA8	0	0
CAAP1	0	0
CABP4	0	0
CACNB4	0	0
CALCOCO2	0	0
CAMK1D	0	0
CAMKK2	0	0
CAPZB	0	0
CARD10	0	0
CARD9	0	0
CASP10	0	0
CASP6	0	0
CASP8AP2	0	0
CAST	0	0
CASZ1	0	0
CAV3	0	0
CBFA2T2	0	0
CBX1	0	0
CBX4	0	0
CBX8	0	0
CCAR1	0	0
CCAR2	0	0
CCDC12	0	0
CCDC121	0	0
CCDC14	0	0
CCDC146	0	0
CCDC155	0	0
CCDC33	0	0
CCDC53	0	0
CCDC87	0	0
CCDC90B	0	0
CCL14	0	0
CCNB2	0	0
CCNDBP1	0	0
CCNE2	0	0
CCNG1	0	0
CCNI	0	0
CCNT1	0	0
CCT4	0	0
CCT6A	0	0
CD22	0	0
CD2AP	0	0
CD33	0	0
CD38	0	0
CD4	0	0
CD93	0	0
CDC20	0	0
CDC20B	0	0
CDC42EP4	0	0
CDCA7L	0	0
CDK17	0	0
CDK19	0	0
CDK2AP2	0	0
CDK5	0	0
CDK5RAP2	0	0
CDK7	0	0
CDK8	0	0
CDKL1	0	0
CEBPE	0	0
CELF1	0	0
CELF2	0	0
CELF3	0	0
CENPA	0	0
CENPB	0	0
CENPJ	0	0
CENPU	0	0
CEP120	0	0
CEP44	0	0
CEP55	0	0
CEP57	0	0
CEP57L1	0	0
CEP72	0	0
CEP76	0	0
CFDP1	0	0
CFL2	0	0
CFTR	0	0
CGA	0	0
CGNL1	0	0
CHAF1B	0	0
CHD6	0	0
CHERP	0	0
CHTF18	0	0
CIB1	0	0
CIB3	0	0
CIR1	0	0
CITED2	0	0
CKAP5	0	0
CKS1B	0	0
CLASP2	0	0
CLDN1	0	0
CLDN3	0	0
CLEC3B	0	0
CLIC1	0	0
CLK2	0	0
CLNS1A	0	0
CMTM6	0	0
CNDP2	0	0
COG4	0	0
COG6	0	0
COL4A3BP	0	0
COL4A5	0	0
COMMD3-BMI1	0	0
CORO1A	0	0
COX6B2	0	0
CPE	0	0
CPNE2	0	0
CPNE6	0	0
CPTP	0	0
CRBN	0	0
CRCT1	0	0
CREB3	0	0
CRELD1	0	0
CRMP1	0	0
CRP	0	0
CRX	0	0
CRY1	0	0
CRY2	0	0
CSA2	0	0
CSAD	0	0
CSDC2	0	0
CSDE1	0	0
CSF2RA	0	0
CSK	0	0
CSNK1A1	0	0
CSNK1D	0	0
CSNK1E	0	0
CSNK1G1	0	0
CSNK2A2	0	0
CSPP1	0	0
CST6	0	0
CSTA	0	0
CSTF2	0	0
CTBP1	0	0
CTBP2	0	0
CTLA4	0	0
CTSB	0	0
CTSD	0	0
CTTN	0	0
CUL2	0	0
CUTC	0	0
CWF19L2	0	0
CXCL2	0	0
CXXC5	0	0
CYP2E1	0	0
CYP2J2	0	0
CYP4A11	0	0
CYSLTR1	0	0
CYTH2	0	0
DAB2	0	0
DACH1	0	0
DAG1	0	0
DAPK2	0	0
DARS	0	0
DAZAP2	0	0
DBN1	0	0
DBP	0	0
DCAF12	0	0
DCAF7	0	0
DCUN1D1	0	0
DCUN1D2	0	0
DCUN1D3	0	0
DCUN1D4	0	0
DCUN1D5	0	0
DCX	0	0
DDAH2	0	0
DDB1	0	0
DDIT4	0	0
DDX21	0	0
DDX24	0	0
DDX26B	0	0
DDX39B	0	0
DEPTOR	0	0
DFNA5	0	0
DGCR6	0	0
DGKD	0	0
DHRS4	0	0
DHX15	0	0
DHX38	0	0
DIDO1	0	0
DISC1	0	0
DKFZP434D1428	0	0
DKFZP434K1772	0	0
DKFZP586C1419	0	0
DKFZP586M1622	0	0
DKFZP686A24188	0	0
DKFZP686E2459	0	0
DKFZP686I0746	0	0
DKFZP686P18130	0	0
DKFZP761E1322	0	0
DKFZP762B153	0	0
DLAT	0	0
DLGAP1	0	0
DLGAP2	0	0
DLGAP3	0	0
DLGAP4	0	0
DLX2	0	0
DLX4	0	0
DMTN	0	0
DNAJB4	0	0
DNAJB6	0	0
DNCI1	0	0
DNMT2	0	0
DOC-1R	0	0
DOCK3	0	0
DOCK7	0	0
DOK2	0	0
DOK3	0	0
DPF2	0	0
DPPA4	0	0
DRAP1	0	0
DSCAML1	0	0
DST	0	0
DTL	0	0
DTNA	0	0
DTNB	0	0
DTNBP1	0	0
DTX1	0	0
DTX2	0	0
DTX3	0	0
DUSP1	0	0
DUSP10	0	0
DUSP12	0	0
DUSP13	0	0
DUSP15	0	0
DUSP16	0	0
DUSP23	0	0
DUSP3	0	0
DUSP6	0	0
DUSP9	0	0
DVL3	0	0
DYDC1	0	0
DYNC1I1	0	0
DYNLL2	0	0
DYRK2	0	0
DYRK4	0	0
E2F6	0	0
EBI3	0	0
ECSIT	0	0
ECT2	0	0
EEF1A2	0	0
EEF1G	0	0
EFEMP2	0	0
EFHC2	0	0
EFNA1	0	0
EFNB1	0	0
EFS	0	0
EFTUD2	0	0
EGF	0	0
EGFL7	0	0
EGLN3	0	0
EHMT2	0	0
[truncated: 1,240 more rows]

## Sheet: Interaction_pairs
Interaction_pair	Hotspot-affected	Cancer_Gene_Census
ABL1_KIT	1	1
ABL2_EGFR	1	1
ABL2_ERBB3	1	1
ABL2_KIT	1	1
ABL2_PIK3R1	1	1
ACVR1_IKBKB	1	1
ACVR1_NRAS	1	1
AKT1_BAX	1	1
AKT1_CREBBP	1	1
AKT1_CTNNB1	1	1
AKT1_DNAJB1	1	1
AKT1_EGFR	1	1
AKT1_FOXO1	1	1
AKT1_MAP2K4	1	1
AKT1_NOTCH1	1	1
AKT1_TCL1A	1	1
APC_CTNNB1	1	1
AR_CCND1	1	1
AR_CTNNB1	1	1
AR_NCOR1	1	1
AR_NCOR2	1	1
ARAF_KRAS	1	1
ARHGEF12_RHOA	1	1
ATM_TP53	1	1
ATP1A1_EZH2	1	1
ATR_TP53	1	1
ATRX_EZH2	1	1
AXIN1_CTNNB1	1	1
AXIN2_CTNNB1	1	1
BAP1_ESR1	1	1
BAX_BCL2	1	1
BAZ1A_SMAD2	1	1
BCL10_CARD11	1	1
BCL2_BCLAF1	1	1
BCL2_TP53	1	1
BCL6_BCOR	1	1
BCL6_NCOR1	1	1
BCL6_TRIM27	1	1
BCL9_CTNNB1	1	1
BCR_TP53	1	1
BLM_TP53	1	1
BRAF_HSP90AB1	1	1
BRAF_MAP2K1	1	1
BRAF_MAP3K1	1	1
BRAF_MAPK1	1	1
BRCA1_EP300	1	1
BRCA1_ESR1	1	1
BRCA1_TP53	1	1
BRCA2_TP53	1	1
BTK_MET	1	1
CASP3_RB1	1	1
CBL_ERBB2	1	1
CCNB1IP1_KEAP1	1	1
CCND1_CDK4	1	1
CCND1_CDK6	1	1
CCND1_CDKN2A	1	1
CCND1_CTNNB1	1	1
CCND1_ESR1	1	1
CCND1_RABEP1	1	1
CCND1_RB1	1	1
CCND2_RB1	1	1
CCNE1_FBXW7	1	1
CCNE1_RB1	1	1
CDH1_CTNNB1	1	1
CDH1_EGFR	1	1
CDK4_CDKN1A	1	1
CDK4_CDKN1B	1	1
CDK4_CDKN2A	1	1
CDK4_CDKN2C	1	1
CDK4_RB1	1	1
CDK6_CDKN2A	1	1
CDK6_RB1	1	1
CDKN1A_TP53	1	1
CDKN2A_MDM2	1	1
CDKN2A_TP53	1	1
CDKN2A_VHL	1	1
CDKN2A_WHSC1L1	1	1
CDKN2C_TP53	1	1
CHEK2_TP53	1	1
CIC_SETD2	1	1
CLTC_EP300	1	1
CREB1_EP300	1	1
CREBBP_CTNNB1	1	1
CREBBP_ESR1	1	1
CREBBP_FOXO1	1	1
CREBBP_FOXO3	1	1
CREBBP_H3F3A	1	1
CREBBP_MYOD1	1	1
CREBBP_NFE2L2	1	1
CREBBP_SMAD2	1	1
CREBBP_SMAD3	1	1
CTNNA2_CTNNB1	1	1
CTNNB1_EP300	1	1
CTNNB1_ERBB2	1	1
CTNNB1_HLA-A	1	1
CTNNB1_JUN	1	1
CTNNB1_LEF1	1	1
CTNNB1_PTPRB	1	1
CTNNB1_PTPRC	1	1
CTNNB1_SMARCA4	1	1
CTNNB1_TCF7L2	1	1
CTNND1_EGFR	1	1
CUX1_MAX	1	1
DAXX_SPOP	1	1
DAXX_TP53	1	1
DDIT3_EP300	1	1
DDIT3_SPOP	1	1
DDX5_EP300	1	1
DDX5_ESR1	1	1
DDX5_TP53	1	1
DNAJB1_NRAS	1	1
DNMT3A_TCL1A	1	1
EGFR_ERBB2	1	1
EGFR_ERBB3	1	1
EGFR_HSP90AA1	1	1
EGFR_HSP90AB1	1	1
EGFR_IRS4	1	1
EGFR_ITK	1	1
EGFR_MUC1	1	1
EGFR_PDGFRA	1	1
EGFR_PIK3R1	1	1
EGFR_PIM1	1	1
EGFR_PLCG1	1	1
EGFR_PTPN11	1	1
EGFR_PTPRB	1	1
EGFR_PTPRC	1	1
EGFR_RAF1	1	1
EGFR_SH2B3	1	1
EGFR_STAT3	1	1
EGFR_VAV1	1	1
EP300_ESR1	1	1
EP300_ETV1	1	1
EP300_EWSR1	1	1
EP300_FEN1	1	1
EP300_FOXO1	1	1
EP300_GOPC	1	1
EP300_JUN	1	1
EP300_MAPK1	1	1
EP300_MAX	1	1
EP300_MDM2	1	1
EP300_MYC	1	1
EP300_PPARG	1	1
EP300_RB1	1	1
EP300_RUNX1	1	1
EP300_SMAD2	1	1
EP300_SMAD3	1	1
EP300_SMAD4	1	1
EP300_SMARCD1	1	1
EP300_STAT3	1	1
EP300_TP63	1	1
EPAS1_SMAD3	1	1
EPAS1_VHL	1	1
ERBB2_ERBB3	1	1
ERBB2_EZR	1	1
ERBB2_HSP90AA1	1	1
ERBB2_HSP90AB1	1	1
ERBB2_IRS4	1	1
ERBB2_ITK	1	1
ERBB2_MLF1	1	1
ERBB2_PIK3R1	1	1
ERBB2_PLCG1	1	1
ERBB2_PTPN11	1	1
ERBB2_PTPRC	1	1
ERBB2_PTPRK	1	1
ERBB2_SH2B3	1	1
ERBB2_SOCS1	1	1
ERBB2_STAT3	1	1
ERBB2_TEC	1	1
ERBB2_VAV1	1	1
ERBB3_HSP90AB1	1	1
ERBB3_NRG1	1	1
ERBB3_PIK3R1	1	1
ERBB3_PLCG1	1	1
ERBB3_SH2B3	1	1
ERBB3_SRC	1	1
ERBB3_SYK	1	1
ERBB3_VAV1	1	1
ERBB4_HSP90AB1	1	1
ERBB4_SYK	1	1
ERCC2_ERCC3	1	1
ERCC2_HSP90AB1	1	1
ESR1_FOXO1	1	1
ESR1_HSP90AA1	1	1
ESR1_HSP90AB1	1	1
ESR1_MAPK1	1	1
ESR1_NCOA1	1	1
ESR1_NCOA2	1	1
ESR1_PIK3R1	1	1
ESR1_SMAD4	1	1
ESR1_SMARCA4	1	1
ESR1_SRC	1	1
ESR1_WHSC1L1	1	1
EWSR1_EZH2	1	1
EWSR1_SMAD4	1	1
EZH2_SUZ12	1	1
EZH2_VAV1	1	1
FBXW7_HSP90AB1	1	1
FBXW7_JUN	1	1
FBXW7_MYC	1	1
FBXW7_NOTCH1	1	1
FES_KIT	1	1
FGFR1_HSP90AB1	1	1
FGFR1_PIK3R1	1	1
FGFR3_HSP90AB1	1	1
FLNA_SMAD3	1	1
FLNA_VHL	1	1
FOXO3_SMAD4	1	1
FOXO3_TP53	1	1
GATA2_SMAD4	1	1
H3F3A_SETD2	1	1
HIF1A_TP53	1	1
HIF1A_VHL	1	1
HLA-A_STAT3	1	1
HRAS_MLLT4	1	1
HRAS_PIK3CA	1	1
HSP90AB1_MAX	1	1
HSP90AB1_TP53	1	1
ID3_MYOD1	1	1
IKBKB_KEAP1	1	1
IKBKB_TP53	1	1
ITK_MET	1	1
ITK_SMAD4	1	1
JUN_NFE2L2	1	1
KDM5A_RB1	1	1
KEAP1_NFE2L2	1	1
KIT_LCK	1	1
KIT_SH2B3	1	1
KIT_SRC	1	1
KIT_TEC	1	1
KRAS_PDE4DIP	1	1
KRAS_RAF1	1	1
KRAS_RALGDS	1	1
KTN1_RHOA	1	1
LATS1_RAC1	1	1
LCK_MET	1	1
LCK_STAT3	1	1
LMO2_SMAD2	1	1
MAPK1_STAT3	1	1
MAPK1_TP53	1	1
MAX_MYC	1	1
MAX_MYCN	1	1
MAX_TRRAP	1	1
MDM2_RB1	1	1
MET_PIK3R1	1	1
MET_PTPRC	1	1
MET_PTPRK	1	1
MET_SH2B3	1	1
MET_SOCS1	1	1
MET_TEC	1	1
MLLT4_SMAD2	1	1
MYD88_SPOP	1	1
MYH9_RAC1	1	1
MYOD1_SMAD4	1	1
NFE2L2_TRIM24	1	1
NPM1_TP53	1	1
NRAS_SMAD4	1	1
PAFAH1B2_STAT3	1	1
PAX8_SMAD4	1	1
PIK3CA_PIK3R1	1	1
PIK3CB_PIK3R1	1	1
PIK3R1_PTPN6	1	1
PLAG1_SMAD3	1	1
PML_TP53	1	1
PPP2R1A_SMAD2	1	1
PPP2R1A_SMAD3	1	1
PRKAR1A_SMAD2	1	1
PTEN_SPOP	1	1
RAC1_RAP1GDS1	1	1
RAC1_SFPQ	1	1
RAC1_VAV1	1	1
RAF1_RB1	1	1
RB1_SMARCA4	1	1
SETD2_SMAD3	1	1
SMAD2_SMAD3	1	1
SMAD2_SMAD4	1	1
SMAD2_STAG1	1	1
SMAD2_UBR5	1	1
SMAD3_SMAD4	1	1
SMAD3_ZBTB16	1	1
SMAD4_TRIM33	1	1
SPOP_ZBTB16	1	1
SRC_STAT3	1	1
STAT3_STAT6	1	1
STAT3_SYK	1	1
TP53_WRN	1	1
A8K147_FGFR2	1	0
A8K1F4_ERBB2_MLF2	1	0
AARSD1_ERBB2	1	0
AARSD1_ERCC2	1	0
AARSD1_VHL	1	0
AATF_RB1	1	0
ABTB1_SMAD2	1	0
ACAT2_AKT1	1	0
ACSM5_EP300	1	0
ACTB_EP300	1	0
ACTN4_EGFR	1	0
ACVR1_AJUBA	1	0
ACVR1_AP2B1	1	0
ACVR1_ARL13B	1	0
ACVR1_BMPR2	1	0
ACVR1_CDK14	1	0
ACVR1_CHN1	1	0
ACVR1_DCAF6	1	0
ACVR1_FANCL	1	0
ACVR1_FBXO30	1	0
ACVR1_FCHO1	1	0
ACVR1_FGD6	1	0
ACVR1_FKBP1A	1	0
ACVR1_FKBP1B	1	0
ACVR1_FKBP4	1	0
ACVR1_HEL112	1	0
ACVR1_ILKAP	1	0
ACVR1_NAA20	1	0
ACVR1_NEK8	1	0
ACVR1_NUAK2	1	0
ACVR1_PAK1	1	0
ACVR1_PLEK	1	0
ACVR1_PLEKHB1	1	0
ACVR1_PLEKHJ1	1	0
ACVR1_RAB17	1	0
ACVR1_RAB25	1	0
ACVR1_RAB3B	1	0
ACVR1_RAB6B	1	0
ACVR1_RAP2A	1	0
ACVR1_RASL12	1	0
ACVR1_RHOBTB1	1	0
ACVR1_RHOD	1	0
ACVR1_RRAS2	1	0
ACVR1_SOCS6	1	0
ACVR1_SQSTM1	1	0
ACVR1_STAT1	1	0
ACVR1_STX8	1	0
ACVR1_TGFBR1	1	0
ACVR1_TTC17	1	0
ACVR1_TTC27	1	0
ACVR1_UBE2E3	1	0
ACVR1_UBXN1	1	0
ACVR1_UHMK1	1	0
ACVR1_USP21	1	0
ACVR1_USP39	1	0
ACVR1_VEPH1	1	0
ACVR1_WDR61	1	0
ACVR1B_RXRA	1	0
ADH6_KRAS	1	0
AES_BCL6	1	0
AGO1_DICER1	1	0
AGO2_DICER1	1	0
AGR3_AKT1	1	0
AHR_EP300	1	0
AHR_RB1	1	0
AIMP2_PPP2R1A	1	0
AKAP13_RHOA	1	0
AKT1_APOH	1	0
AKT1_BPGM	1	0
AKT1_COMMD1	1	0
AKT1_IL13RA2	1	0
AKT1_IL24	1	0
AKT1_MTA3	1	0
AKT1_PDK1	1	0
AKT1_PPP2R4	1	0
AKT1_PRKCZ	1	0
AKT1_PTGDS	1	0
AKT1_RASL10B	1	0
AKT1_RPS6KB1	1	0
AKT1_S100A14	1	0
AKT1_SERPINB5	1	0
AKT1_SKP2	1	0
AKT1_SNCB	1	0
AKT1_SRR	1	0
AKT1_STK3	1	0
AKT1_STK4	1	0
AKT1_SULT4A1	1	0
AKT1_TFF1	1	0
AKT1_THEM4	1	0
AKT1_THRSP	1	0
ALOX5_DICER1	1	0
ANAPC2_SMAD2	1	0
ANG_PTEN	1	0
ANGPTL4_CDKN2A	1	0
ANGPTL4_ESR1	1	0
ANGPTL4_FBXW7	1	0
ANK3_SMAD2	1	0
ANK3_SMAD3	1	0
ANKRD28_PPP6C	1	0
ANKS1A_RB1	1	0
ANLN_RHOA	1	0
ANTXR2_SMAD2	1	0
ANXA1_EGFR	1	0
ANXA3_TP53	1	0
ANXA6_ERBB2	1	0
ANXA7_TP53	1	0
AP1B1_SMAD2	1	0
AP2A1_RIT1	1	0
AP2B1_SMAD4	1	0
AP4S1_GTF2I	1	0
APBA3_EGFR	1	0
APBB1_EGFR	1	0
APBB1_ERBB2	1	0
APBB2_EGFR	1	0
APBB2_SMAD4	1	0
APBB3_EGFR	1	0
APBB3_ERBB2	1	0
APEX1_EP300	1	0
APEX1_TP53	1	0
APOA1_KRAS	1	0
APOB_SMAD3	1	0
APOE_RHEB	1	0
APOH_TP53	1	0
APP_EGFR	1	0
APPL1_EGFR	1	0
APPL1_TP53	1	0
ARAP1_FGFR3	1	0
ARFGAP3_SMAD2	1	0
ARFIP2_RAC1	1	0
ARFIP2_STAT3	1	0
ARFRP1_SMAD4	1	0
ARHG_SMAD4	1	0
ARHGAP1_RHOA	1	0
ARHGAP20_RHOA	1	0
ARHGAP31_RAC1	1	0
ARHGAP33_RAC1	1	0
ARHGDIA_RAC1	1	0
ARHGDIA_RHOA	1	0
ARHGDIB_RAC1	1	0
ARHGEF1_SMAD2	1	0
ARHGEF11_RHOA	1	0
ARHGEF11_SMAD4	1	0
ARHGEF15_ESR1	1	0
ARHGEF4_RAC1	1	0
ARHGEF6_SMAD2	1	0
ARHGEF6_SMAD3	1	0
ARHGEF7_EGFR	1	0
ARHGEF7_SMAD2	1	0
ARHGEF7_SMAD3	1	0
ARHGEF7_SMAD4	1	0
ARHGEF9_BCL6	1	0
ARIH2_TP53	1	0
ARL2BP_RAC1	1	0
ARL3_TP53	1	0
ARL4D_SMAD2	1	0
ARL5A_SMAD4	1	0
ARL5B_SMAD4	1	0
ARL6IP1_FBXW7	1	0
ARL8B_TGFBR1	1	0
ARRB1_EGFR	1	0
ARRB2_EGFR	1	0
ARRB2_SMO	1	0
ARSF_EP300	1	0
ASF1A_HIST1H3A	1	0
ASF1B_HIST1H3A	1	0
ASH1L_HIST1H3A	1	0
ATAD2_ESR1	1	0
ATF2_EP300	1	0
ATF3_FGFR3	1	0
ATF3_TP53	1	0
ATF4_NFE2L2	1	0
ATF5_EP300	1	0
ATF7IP_SMAD4	1	0
ATG5_KEAP1	1	0
ATP1B1_EZH2	1	0
ATP5C1_EGFR	1	0
ATP6AP1_ERBB2	1	0
ATP6V1G1_BCL2L11	1	0
ATXN1_SETD2	1	0
AURKA_VHL	1	0
AURKB_BCL2L11	1	0
B3KNU0_RAC1	1	0
B4DT73_TP53	1	0
B4DYC6_ERBB2	1	0
B4DYC6_ERCC2	1	0
B4DYC6_KEAP1	1	0
B7Z2P9_BRAF	1	0
BAD_KEAP1	1	0
BAG1_TP53	1	0
BAG2_TP53	1	0
BAG6_RAC1	1	0
BAI1_ERBB2	1	0
BAIAP2_EGFR	1	0
BAIAP2_RAC1	1	0
BAIAP3_ERBB2	1	0
BAK1_BCL2	1	0
BAK1_BCL2L11	1	0
BANP_MAP2K1	1	0
BANP_MAX	1	0
BATF3_PGR	1	0
BATF3_STAT3	1	0
BAX_BCL2L11	1	0
BCAR3_ERBB2	1	0
BCAR3_ERBB3	1	0
BCAR3_MET	1	0
BCAS2_EP300	1	0
BCAS3_CCND1	1	0
BCAS3_FBXW7	1	0
BCAS3_KRAS	1	0
BCAS3_SMAD4	1	0
BCKDK_STAT3	1	0
BCL2_BCL2L11	1	0
BCL2_BIK	1	0
BCL2_HRK	1	0
BCL2_MCL1	1	0
BCL2_TP53BP2	1	0
BCL2A1_BCL2L11	1	0
BCL2L1_BCL2L11	1	0
BCL2L1_TP53	1	0
BCL2L11_BCL2L2	1	0
BCL2L11_DNCL1	1	0
BCL2L11_DYNLL1	1	0
BCL2L11_FEM1C	1	0
BCL2L11_FGL1	1	0
BCL2L11_MAGEA11	1	0
BCL2L11_MCL1	1	0
BCL2L11_RIOK3	1	0
BCL6_BLZF1	1	0
BCL6_CCDC36	1	0
BCL6_DVL2	1	0
BCL6_ENO1	1	0
BCL6_GLRX3	1	0
BCL6_GOLGA2	1	0
BCL6_KIFC3	1	0
BCL6_MTUS2	1	0
BCL6_PP2150	1	0
BCL6_SIN3A	1	0
BCL6_TFIP11	1	0
BCL6_TRAF1	1	0
BEX1_CDH1	1	0
BEX1_CHEK2	1	0
BEX1_FBXW7	1	0
BEX1_FGFR2	1	0
BEX1_PTEN	1	0
BEX1_SMAD4	1	0
BEX2_FGFR2	1	0
BLID_CDH1	1	0
BLID_HRAS	1	0
BLK_STAT3	1	0
BLMH_PDPK1	1	0
BLNK_ERBB2	1	0
BMI1_EZH2	1	0
BMP1_TP53	1	0
BMX_ERBB2	1	0
BORA_FGFR3	1	0
BRAF_CCDC88A	1	0
BRAF_NEDD4L	1	0
BRAF_PAK2	1	0
BRAF_TERF1	1	0
BRCA1_UBE2D3	1	0
BRD7_TP53	1	0
BRINP1_CCND1	1	0
BRINP1_RAC1	1	0
BRPF1_HIST1H3A	1	0
BTBD2_SMAD2	1	0
BTBD2_TP53	1	0
BTK_GTF2I	1	0
BTRC_CTNNB1	1	0
BTRC_SMAD4	1	0
C-FGR_EGFR	1	0
C1R_EP300	1	0
C22ORF46_SMAD2	1	0
C2ORF44_PDPK1	1	0
C2ORF88_MYOD1	1	0
C4BPA_GTF2I	1	0
C6ORF47_FGFR3	1	0
C7ORF25_EZH2	1	0
CAB39_STK11	1	0
CACNA1A_NOTCH1	1	0
CACYBP_ERBB2	1	0
CACYBP_ERCC2	1	0
CAD_XPO1	1	0
CADPS2_UBE2D3	1	0
CALM1_EGFR	1	0
CALM1_KRAS	1	0
CAMK2D_SMAD4	1	0
CAMLG_EGFR	1	0
CAPN1_STAT3	1	0
CAPNS1_STAT3	1	0
CARD11_MAP3K7IP1	1	0
CARD11_PDPK1	1	0
CARD11_PRKCQ	1	0
CARD11_TAB1	1	0
CARM1_EP300	1	0
CASC3_CDKN2A	1	0
CASK_EP300	1	0
CASP2_CASP8	1	0
CASP2_RXRA	1	0
CASP7_CASP8	1	0
CASP7_RB1	1	0
CASP8_CFLAR	1	0
CASP8_PRKCI	1	0
CAT_KEAP1	1	0
CAV1_EGFR	1	0
CAV2_EGFR	1	0
CBL_UBE2D2	1	0
CBL_UBE2L3	1	0
CBLL1_CDH1	1	0
CBX5_TCEB1	1	0
CCDC106_TP53	1	0
CCDC17_FGFR3	1	0
CCDC85B_EZH2	1	0
CCL18_TP53	1	0
CCL5_CDH1	1	0
CCL5_CHEK2	1	0
CCL5_KRAS	1	0
CCNB1_RB1	1	0
CCND1_CDK1	1	0
CCND1_CDK2	1	0
CCND1_MCM10	1	0
CCND1_POLR1B	1	0
CCND1_RANBP9	1	0
CCND1_TAF1	1	0
CCND1_ZNF8	1	0
CCNH_ERCC2	1	0
CCT5_TP53	1	0
CCT7_KRAS	1	0
CD2_EP300	1	0
CD59_SMAD4	1	0
CDAN1_PDPK1	1	0
CDC23_RAC1	1	0
CDC25A_SMAD3	1	0
CDC25A_XPO1	1	0
CDC25C_EGFR	1	0
CDC27_CDH1	1	0
CDC27_RB1	1	0
CDC37_EGFR	1	0
CDC37_ERBB2	1	0
CDC37_FGFR3	1	0
CDC40_SMAD2	1	0
CDC42_PIK3R1	1	0
CDC42_PRKCI	1	0
CDC42_TP53	1	0
CDC45_CDKN2A	1	0
CDC5L_CDKN2A	1	0
CDC5L_U2AF1	1	0
CDC6_CDKN2A	1	0
CDC7_CDKN2A	1	0
CDH1_CTNNA1	1	0
CDH1_CYP17A1	1	0
CDH1_MTA3	1	0
CDH1_NAT2	1	0
CDH1_PSEN1	1	0
CDH1_PSMC3IP	1	0
CDH1_SKP2	1	0
CDH1_THRSP	1	0
CDH13_CHEK2	1	0
CDH2_CTNNB1	1	0
CDH5_CTNNB1	1	0
CDK1_EGFR	1	0
CDK1_EZH2	1	0
CDK1_RB1	1	0
CDK14_RB1	1	0
CDK2_RB1	1	0
CDK3_RB1	1	0
CDK4_CDKN2B	1	0
CDK4_CDKN2D	1	0
CDK4_TGFBR1	1	0
CDK5R1_CTNNB1	1	0
CDK9_RB1	1	0
CDKN2A_CDKN2AIP	1	0
CDKN2A_CRELD2	1	0
CDKN2A_DEAF1	1	0
CDKN2A_E2F1	1	0
CDKN2A_FN1	1	0
CDKN2A_GMNN	1	0
CDKN2A_HAUS1	1	0
CDKN2A_HNRNPU	1	0
CDKN2A_MCM10	1	0
CDKN2A_MCM2	1	0
CDKN2A_MCM5	1	0
CDKN2A_NAT2	1	0
CDKN2A_ORC4	1	0
CDKN2A_ORC5	1	0
CDKN2A_ORC5L	1	0
CDKN2A_PRKCA	1	0
CDKN2A_Q96BA7	1	0
CDKN2A_Q9UQS6	1	0
CDKN2A_SERTAD1	1	0
CDKN2A_TDRD7	1	0
CDKN2A_UBC	1	0
CEBPB_RB1	1	0
CEBPB_SMAD4	1	0
CEBPD_RB1	1	0
CENPC_TCEB1	1	0
CENPT_ESR1	1	0
CEP126_FGFR3	1	0
CEP63_EZH2	1	0
CFAP36_RAC1	1	0
CFH_EP300	1	0
CFH_SMAD3	1	0
CFL1_EGFR	1	0
CFL1_ESR1	1	0
CHAF1A_HIST1H3A	1	0
CHD3_TP53	1	0
CHEK1_SMAD4	1	0
CHEK1_TP53	1	0
CHEK2_CYP17A1	1	0
CHEK2_DIRAS3	1	0
CHEK2_ENO1	1	0
CHEK2_FAM84B	1	0
CHEK2_HMGN1	1	0
CHEK2_HOXC6	1	0
CHEK2_IL24	1	0
CHEK2_KLK7	1	0
CHEK2_KLK9	1	0
CHEK2_MUS81	1	0
CHEK2_PLK1	1	0
CHEK2_POLR2L	1	0
CHEK2_PRMT2	1	0
CHEK2_PSMC3IP	1	0
CHEK2_RHOBTB2	1	0
CHEK2_SLC25A6	1	0
CHEK2_STMN1	1	0
CHEK2_TLR3	1	0
CHFR_UBE2D3	1	0
CHGB_FGFR3	1	0
CHGB_PTEN	1	0
CHN2_ERBB3	1	0
CHN2_RB1	1	0
CHRD_SMAD3	1	0
CHUK_CTNNB1	1	0
CISH_EGFR	1	0
CISH_ERBB2	1	0
CIT_RHOA	1	0
CLASRP_SMAD3	1	0
CLCN6_ERBB2	1	0
CLIP2_MAX	1	0
CLNK_EGFR	1	0
CLNK_ERBB2	1	0
CLNK_RB1	1	0
CLU_KEAP1	1	0
CNKSR1_RHOA	1	0
CNKSR1_SMAD4	1	0
CNOT4_EP300	1	0
COG5_RAC1	1	0
COIII_KRAS	1	0
COIII_RAC1	1	0
COPS5_MAX	1	0
COPS5_SMAD4	1	0
COPS6_EP300	1	0
COPS6_PTEN	1	0
COX17_TP53	1	0
CPSF7_SMAD3	1	0
CREBBP_HIST1H3A	1	0
CREBBP_SUMO1	1	0
CRELD2_RAC1	1	0
CRK_EGFR	1	0
CRK_ERBB2	1	0
CRK_ERBB3	1	0
CRK_MET	1	0
CRK_TP53	1	0
CRKL_EGFR	1	0
CRKL_ERBB2	1	0
CRKL_ERBB3	1	0
CSH2_SMAD4	1	0
CSN2_RAC1	1	0
CSNK2A1_PTEN	1	0
CSNK2A1_TP53	1	0
CSNK2A1_VHL	1	0
CSNK2B_RXRA	1	0
CSNK2B_TP53	1	0
CSRP1_ESR1	1	0
CSRP3_MYOD1	1	0
CTNNB1_CTNNBIP1	1	0
CTNNB1_ERBB2IP	1	0
CTNNB1_GSK3A	1	0
CTNNB1_GSK3B	1	0
CTNNB1_NEK2	1	0
CTNNB1_NFKB1	1	0
CTNNB1_NR3C4	1	0
CTNNB1_NR5A2	1	0
CTNNB1_PSEN1	1	0
CTNNB1_PTPN12	1	0
CTNNB1_PTPRF	1	0
CTNNB1_PTPRG	1	0
CTNNB1_PTPRJ	1	0
CTNNB1_PTPRO	1	0
CTNNB1_Q9UII7	1	0
CTNNB1_RABAC1	1	0
CTNNB1_RUVBL2	1	0
CTNNB1_SKP1	1	0
CTNNB1_TAX1BP3	1	0
CTNNB1_TBL1X	1	0
CTNNB1_TCF4	1	0
CTNNB1_UBE2B	1	0
CTNNB1_ZFYVE9	1	0
CTPS2_FGFR1	1	0
CTSK_FGFR3	1	0
CUL1_FBXW7	1	0
CUL5_SMAD2	1	0
CUL7_TP53	1	0
CUL9_TP53	1	0
CXCL1_ESR1	1	0
CXCL1_HRAS	1	0
CXCL1_PTEN	1	0
CYB_KRAS	1	0
CYFIP2_SMAD4	1	0
CYP11A1_SMAD2	1	0
CYP17A1_ERBB2	1	0
D2HGDH_STK11	1	0
DAAM1_RHOA	1	0
DAB1_ERBB2	1	0
DAB1_ERBB3	1	0
DAO_EP300	1	0
DAPP1_ERBB3	1	0
DCAF6_SMAD2	1	0
DCN_EGFR	1	0
DCP1A_SMAD4	1	0
DCP1B_SMAD4	1	0
DDX19A_XPO1	1	0
DDX47_KRAS	1	0
DDX50_KRAS	1	0
DDX54_ESR1	1	0
DEAF1_HRAS	1	0
DEAF1_KRAS	1	0
DECR2_EP300	1	0
DIAPH1_RHOA	1	0
DICER1_PRKAB2	1	0
DICER1_PRKRA	1	0
DIPLA1_SMAD2	1	0
DIRAS3_KRAS	1	0
DKFZP434G2016_RAC1	1	0
DKFZP434N041_SMAD2	1	0
DKFZP434N041_SMAD4	1	0
DKFZP434N101_FGFR1	1	0
DKFZP451F1115_RAC1	1	0
DKFZP451F1115_RHOA	1	0
DKFZP451O0517_ERBB4	1	0
DKFZP666O0110_RAC1	1	0
DKFZP686H01244_KEAP1	1	0
DKFZP686L11144_SMAD4	1	0
DKFZP686M02159_GTF2I	1	0
DKFZP686N0152_STK11	1	0
DKFZP761H172_MAP2K1	1	0
DKFZP761H172_MAX	1	0
DKFZP781O1323_SMAD4	1	0
DKK3_SMAD4	1	0
DLEU1_TP53	1	0
DLG1_PTEN	1	0
DLG3_ERBB4	1	0
DLG4_ERBB4	1	0
DNAJA3_KRAS	1	0
DNAJA3_MET	1	0
DNAJB11_EZH2	1	0
DNAJB2_SMAD4	1	0
DNAJB5_SMAD2	1	0
DNAJC7_SMAD2	1	0
DNMT1_EZH2	1	0
DNMT1_RB1	1	0
DNMT3A_FLJ00340	1	0
DNMT3A_PIAS1	1	0
DNMT3A_PIAS2	1	0
DNMT3A_SP100	1	0
DNMT3A_TERF2IP	1	0
DNMT3A_UBE2I	1	0
DNMT3B_EZH2	1	0
DOCK1_RAC1	1	0
DOCK2_RAC1	1	0
DOCK8_SMAD2	1	0
DOK1_EGFR	1	0
DOK1_ERBB2	1	0
DOK4_EGFR	1	0
DOK4_ERBB2	1	0
DOK5_EGFR	1	0
DOK6_EGFR	1	0
DOK6_ERBB2	1	0
DPP3_KEAP1	1	0
DPPA2_SPOP	1	0
DPY30_GTF2I	1	0
DTX3L_UBE2D3	1	0
DUT_ESR1	1	0
DVL2_TP53	1	0
DYNC1H1_MAX	1	0
DYNC1H1_SMAD2	1	0
DYRK1B_HNF1A	1	0
DZIP3_UBE2D3	1	0
E2F4_RB1	1	0
E2F5_EP300	1	0
E9KL35_RHOA	1	0
EAF2_TP53	1	0
ECH1_STAT3	1	0
EDG2_KRAS	1	0
EEA1_EGFR	1	0
EEF1A1_KRAS	1	0
EEF1A1_NRAS	1	0
EEF1A1_SMAD2	1	0
EEF1A1_SMAD4	1	0
EFNB3_TCEB1	1	0
EGFR_EPS8	1	0
EGFR_ERRFI1	1	0
EGFR_FKBP5	1	0
EGFR_GAB1	1	0
EGFR_GAPDH	1	0
EGFR_GRAP2	1	0
EGFR_GRB10	1	0
EGFR_GRB2	1	0
EGFR_HDAC6	1	0
EGFR_HDAC7	1	0
EGFR_HEL-S-1	1	0
EGFR_HEL-S-162EP	1	0
EGFR_HEL-S-72	1	0
EGFR_HEL-S-72P	1	0
EGFR_HSPA1A	1	0
EGFR_HSPA1B	1	0
EGFR_HSPA4	1	0
EGFR_HSPA8	1	0
EGFR_HSPA9	1	0
EGFR_IKBKG	1	0
EGFR_IRS1	1	0
EGFR_ITGB2	1	0
EGFR_ITSN2	1	0
EGFR_JUP	1	0
EGFR_LAMP1	1	0
EGFR_LAT	1	0
EGFR_LCP2	1	0
EGFR_MAP3K3	1	0
EGFR_MAP4K1	1	0
EGFR_MAPK8	1	0
EGFR_MAPK8IP1	1	0
EGFR_MAPK8IP2	1	0
EGFR_MAPK9	1	0
EGFR_MAPT	1	0
EGFR_NCK1	1	0
EGFR_NCK2	1	0
EGFR_NEDD4	1	0
EGFR_NR3C1	1	0
EGFR_NTRK2	1	0
EGFR_NUDCD3	1	0
EGFR_NUMB	1	0
EGFR_NUMBL	1	0
EGFR_PAK1	1	0
EGFR_PDCD6IP	1	0
EGFR_PIK3C2B	1	0
EGFR_PIK3R2	1	0
EGFR_PIK3R3	1	0
EGFR_PLCG2	1	0
EGFR_PPP5C	1	0
EGFR_PRKCA	1	0
EGFR_PRKCE	1	0
EGFR_PRKCZ	1	0
EGFR_PTPN1	1	0
EGFR_PTPN12	1	0
EGFR_PTPN18	1	0
EGFR_PTPN22	1	0
EGFR_PTPRJ	1	0
EGFR_Q53FC7	1	0
EGFR_Q53HG7	1	0
EGFR_Q59EA3	1	0
EGFR_Q59FG2	1	0
EGFR_Q59GY7	1	0
EGFR_Q7Z4F3	1	0
EGFR_Q86SX1	1	0
EGFR_Q8TAS0	1	0
EGFR_Q96BE0	1	0
EGFR_Q9HA84	1	0
EGFR_Q9UII7	1	0
EGFR_RAPGEF1	1	0
EGFR_RASA1	1	0
EGFR_RGS4	1	0
EGFR_RIN2	1	0
EGFR_RUTBC1	1	0
EGFR_S100A4	1	0
EGFR_SFN	1	0
EGFR_SGSM2	1	0
EGFR_SH2B1	1	0
EGFR_SH2D1A	1	0
EGFR_SH2D2A	1	0
EGFR_SH2D3A	1	0
EGFR_SH2D3C	1	0
EGFR_SH3GL2	1	0
EGFR_SH3GL3	1	0
EGFR_SHC1	1	0
EGFR_SHC2	1	0
EGFR_SHC3	1	0
EGFR_SHC4	1	0
EGFR_SLA	1	0
EGFR_SLA2	1	0
EGFR_SNCA	1	0
EGFR_SNX1	1	0
EGFR_SNX9	1	0
EGFR_SOCS3	1	0
EGFR_SOCS6	1	0
EGFR_SOS2	1	0
EGFR_STAP2	1	0
EGFR_STAT1	1	0
EGFR_STAT2	1	0
EGFR_STUB1	1	0
EGFR_TAB1	1	0
EGFR_TLN1	1	0
EGFR_TLR2	1	0
EGFR_TNFRSF1A	1	0
EGFR_TNS3	1	0
EGFR_TNS4	1	0
EGFR_TRAF2	1	0
EGFR_TUBA1A	1	0
EGFR_TXN	1	0
EGFR_WASF3	1	0
EGFR_WASL	1	0
EGFR_YWHAQ	1	0
EGFR_YWHAZ	1	0
EGLN1_KRAS	1	0
EGR1_EP300	1	0
EHMT1_TP53	1	0
EID1_RB1	1	0
EIF1AX_IPO13	1	0
EIF2S2_TP53	1	0
EIF3L_SMAD2	1	0
ENO1_EP300	1	0
EP300_EPO	1	0
EP300_FBXL5	1	0
EP300_FBXO25	1	0
EP300_FN1	1	0
EP300_FOS	1	0
EP300_GAA	1	0
EP300_GOLGA2	1	0
EP300_GRB2	1	0
EP300_HIST1H1A	1	0
EP300_HIST1H2AB	1	0
EP300_HIST1H2BB	1	0
EP300_HIST1H3A	1	0
EP300_HIST2H2AB	1	0
EP300_HIST2H2AC	1	0
EP300_HIST2H2BE	1	0
EP300_HIST3H3	1	0
EP300_HNRNPUL1	1	0
EP300_HPS6	1	0
EP300_IGBP1	1	0
EP300_IMMT	1	0
EP300_ITIH3	1	0
EP300_KAT2B	1	0
EP300_KCTD5	1	0
EP300_KHDRBS1	1	0
EP300_KRT18	1	0
EP300_LCP2	1	0
EP300_MAGED1	1	0
EP300_MAP3K5	1	0
EP300_MAPRE1	1	0
EP300_MCM3AP	1	0
EP300_MSTO1	1	0
EP300_NAP1L1	1	0
EP300_NOXA1	1	0
EP300_NPY5R	1	0
EP300_NR1C1	1	0
EP300_NR1I1	1	0
EP300_NR1I3	1	0
EP300_NR4A1	1	0
EP300_PAK2	1	0
EP300_PC4	1	0
EP300_PCBD1	1	0
EP300_PCK2	1	0
EP300_PLG	1	0
EP300_PLK1	1	0
EP300_PLSCR1	1	0
EP300_PLSCR2	1	0
EP300_POLD2	1	0
EP300_PPARA	1	0
EP300_PRDX4	1	0
EP300_PS1TP5BP1	1	0
EP300_Q9H2B0	1	0
EP300_Q9UBT1	1	0
EP300_RELA	1	0
EP300_RPL27	1	0
EP300_SAV1	1	0
EP300_SEPP1	1	0
EP300_SERPINA5	1	0
EP300_SERTAD1	1	0
EP300_SIRT2	1	0
EP300_SP1	1	0
EP300_SREBF1	1	0
EP300_STAT5A	1	0
EP300_THPO	1	0
EP300_TINAGL1	1	0
EP300_TNIP2	1	0
EP300_TP73	1	0
EP300_TRAF2	1	0
EP300_TSNAX	1	0
EP300_UBC	1	0
EP300_UBQLN1	1	0
EP300_VDR	1	0
EP300_VPS18	1	0
EP300_WASL	1	0
EP300_WDR59	1	0
EP300_XRCC6	1	0
EP300_YY1	1	0
EP300_ZC3H12A	1	0
EPRS_XPO1	1	0
EPSTI1_ESR1	1	0
ERBB2_FKBP5	1	0
ERBB2_GLCE	1	0
ERBB2_GMPR2	1	0
ERBB2_GRAP2	1	0
ERBB2_GRB2	1	0
ERBB2_HDAC6	1	0
ERBB2_HDLBP	1	0
ERBB2_IARS	1	0
ERBB2_IL13RA2	1	0
ERBB2_IRS1	1	0
ERBB2_JUP	1	0
ERBB2_KLK5	1	0
ERBB2_LYPD3	1	0
ERBB2_MAPK8IP1	1	0
ERBB2_MAPK8IP2	1	0
ERBB2_MTCH1	1	0
ERBB2_MUCL1	1	0
ERBB2_NAT2	1	0
ERBB2_NCK2	1	0
ERBB2_NUDC	1	0
ERBB2_NUDCD3	1	0
ERBB2_PHF23	1	0
ERBB2_PIK3R2	1	0
ERBB2_PIK3R3	1	0
ERBB2_PLCG2	1	0
ERBB2_POLD2	1	0
ERBB2_PPP5C	1	0
ERBB2_PRDM14	1	0
ERBB2_PSAP	1	0
ERBB2_PSMC3IP	1	0
ERBB2_PSMD2	1	0
ERBB2_PTPN3	1	0
ERBB2_PTPRG	1	0
ERBB2_PTPRO	1	0
ERBB2_PTPRZ1	1	0
ERBB2_Q53FC7	1	0
ERBB2_Q96BE0	1	0
ERBB2_RASA1	1	0
ERBB2_RHOBTB2	1	0
ERBB2_RIN1	1	0
ERBB2_RIN2	1	0
ERBB2_SH2D1B	1	0
ERBB2_SH2D2A	1	0
ERBB2_SH2D3A	1	0
ERBB2_SH2D5	1	0
ERBB2_SH3BP2	1	0
ERBB2_SHC1	1	0
ERBB2_SHC2	1	0
ERBB2_SHC3	1	0
ERBB2_SLA	1	0
ERBB2_SLA2	1	0
ERBB2_STAT1	1	0
ERBB2_STIP1	1	0
ERBB2_STK24	1	0
ERBB2_STUB1	1	0
ERBB2_SUPT6H	1	0
ERBB2_TCEAL2	1	0
ERBB2_THRSP	1	0
ERBB2_TLN1	1	0
ERBB2_TNS2	1	0
ERBB2_TNS3	1	0
ERBB2_TTC9B	1	0
ERBB2_TXK	1	0
ERBB2_UNC45B	1	0
ERBB2_UTP18	1	0
ERBB2_VAV2	1	0
ERBB2_VAV3	1	0
ERBB2IP_SMAD3	1	0
ERBB3_FLYWCH1	1	0
ERBB3_GRB7	1	0
ERBB3_NCK1	1	0
ERBB3_NCK2	1	0
ERBB3_ODF2L	1	0
ERBB3_PA2G4	1	0
ERBB3_PIK3R2	1	0
ERBB3_PIK3R3	1	0
ERBB3_RASA1	1	0
ERBB3_RASA4	1	0
ERBB3_RIN1	1	0
ERBB3_SH2D1A	1	0
ERBB3_SHC1	1	0
ERBB3_SHC3	1	0
ERBB3_TNS2	1	0
ERBB3_TNS3	1	0
ERBB3_TNS4	1	0
ERBB3_VAV2	1	0
ERBB3_VAV3	1	0
ERBB4_ITCH	1	0
ERBB4_NEDD4	1	0
ERBB4_RASA1	1	0
ERBB4_SHC1	1	0
ERCC2_GTF2H1	1	0
ERCC2_GTF2H2	1	0
ERCC2_GTF2H2C	1	0
ERCC2_GTF2H3	1	0
ERCC2_HSF2	1	0
ERCC2_PPP5C	1	0
ERCC2_STIP1	1	0
ERH_TP53	1	0
ERLEC1_STK11	1	0
ERRFI1_FGFR2	1	0
ESR1_FN1	1	0
ESR1_GLCE	1	0
ESR1_HBP1	1	0
ESR1_KAT5	1	0
ESR1_KIF1A	1	0
ESR1_KLK5	1	0
ESR1_MED1	1	0
ESR1_MTCH2	1	0
ESR1_MYL6	1	0
ESR1_NCOA3	1	0
ESR1_NCOA6	1	0
ESR1_NPPA	1	0
ESR1_NRIP1	1	0
ESR1_PAK1	1	0
ESR1_PGR	1	0
ESR1_PHB2	1	0
ESR1_PIAS1	1	0
ESR1_PNRC2	1	0
ESR1_PRMT2	1	0
ESR1_PSMC3IP	1	0
ESR1_PSMC5	1	0
ESR1_RBM39	1	0
ESR1_SERPINB5	1	0
ESR1_TRAM1	1	0
ESR1_UBE4B	1	0
ETF1_KEAP1	1	0
ETS1_PAX5	1	0
EZH2_GTF3C1	1	0
EZH2_HDAC1	1	0
EZH2_KDM1A	1	0
EZH2_KLHDC2	1	0
EZH2_MAP3K7	1	0
EZH2_MAPK8IP2	1	0
EZH2_MAPKAPK3	1	0
EZH2_NINL	1	0
EZH2_POLA2	1	0
EZH2_PRMT5	1	0
EZH2_Q59GK3	1	0
EZH2_RASA1	1	0
EZH2_RIN3	1	0
EZH2_RPN2	1	0
EZH2_RPS6KA5	1	0
EZH2_SIRT1	1	0
EZH2_SMN1	1	0
EZH2_SMS	1	0
EZH2_SUV39H1	1	0
EZH2_TAF1D	1	0
EZH2_TK1	1	0
EZH2_TNFSF11	1	0
EZH2_WDR61	1	0
EZH2_WSB2	1	0
EZH2_ZAK	1	0
FADD_SPOP	1	0
FAM101A_FBXW7	1	0
FAM117B_KEAP1	1	0
FAM161B_SMAD2	1	0
FAM173A_TP53	1	0
FAM46A_KEAP1	1	0
FAM65B_RHOA	1	0
FAM84B_SMAD4	1	0
FBLN1_SMAD3	1	0
FBLN1_SMAD4	1	0
FBN2_SMAD2	1	0
FBXO3_SMAD2	1	0
FBXO3_SMAD3	1	0
FBXO30_SMAD4	1	0
FBXO34_SMAD4	1	0
FBXW7_IL24	1	0
FBXW7_LINGO1	1	0
FBXW7_MMS22L	1	0
FBXW7_NUDCD2	1	0
FBXW7_SCGB3A1	1	0
FBXW7_SHPRH	1	0
FBXW7_SKP1	1	0
FBXW7_SUMF2	1	0
FBXW7_TRIM25	1	0
FBXW7_WDR97	1	0
FCAMR_TP53	1	0
FGF1_FGFR2	1	0
FGF1_FGFR3	1	0
FGF10_FGFR2	1	0
FGF2_FGFR2	1	0
FGF23_FGFR1	1	0
FGF8_FGFR2	1	0
FGFR1_NEDD4	1	0
FGFR2_GLCE	1	0
FGFR2_GRB2	1	0
FGFR2_HOXC6	1	0
FGFR2_MTA3	1	0
FGFR2_NEDD4	1	0
FGFR2_PPM1A	1	0
FGFR2_Q16089	1	0
FGFR2_RHOBTB2	1	0
FGFR2_TFF1	1	0
FGFR3_FLJ10324	1	0
FGFR3_G4	1	0
FGFR3_GPSM3	1	0
FGFR3_GTF3C1	1	0
FGFR3_GUSBP1	1	0
FGFR3_HBZ	1	0
FGFR3_HNRNPL	1	0
FGFR3_KRT8	1	0
FGFR3_NDUFS6	1	0
FGFR3_POLA2	1	0
FGFR3_Q7L4M3	1	0
FGFR3_RADIL	1	0
FGFR3_RNF130	1	0
FGFR3_RPL8	1	0
FGFR3_SLC25A6	1	0
FGFR3_SMG7	1	0
FGR_KIT	1	0
FGR_STAT3	1	0
FKBP5_STK11	1	0
FKBPL_KEAP1	1	0
FLJ00380_KEAP1	1	0
FLJ23584_SMAD2	1	0
FN1_SMAD4	1	0
FOCAD_UBE2D3	1	0
FOXA1_Q59EF7	1	0
FOXA1_SEZ6L2	1	0
FOXA1_TLE1	1	0
FOXH1_SMAD2	1	0
FOXH1_SMAD3	1	0
FOXO1_PIK3R3	1	0
FOXO1_Q9UBT1	1	0
FOXO1_SIRT1	1	0
FOXO1_TNS2	1	0
FOXP1_IL3RA	1	0
FOXP1_MNAT1	1	0
FXYD6_TP53	1	0
GAB1_MET	1	0
GADD45A_TP53	1	0
GADD45GIP1_STAT3	1	0
GATA3_PSMA3	1	0
GATA3_RARB	1	0
GATAD2B_SMAD2	1	0
GCC1_GLI1	1	0
GCC1_GTF2I	1	0
GCC1_SPOP	1	0
GFER_SMAD2	1	0
GFI1B_NOTCH1	1	0
GGA1_SMAD3	1	0
GIT1_PDPK1	1	0
GIT2_SMAD3	1	0
GIT2_SPOP	1	0
GK_RXRA	1	0
GLI1_PRKAA2	1	0
GLI1_RAI1	1	0
GLI1_TRIM42	1	0
GLI1_XBP1	1	0
GLI3_SPOP	1	0
GLRX5_KEAP1	1	0
GNAQ_PLCB1	1	0
GNPDA1_STK11	1	0
GPERIK_KEAP1	1	0
GPNMB_SMAD4	1	0
GPX2_TP53	1	0
GRB2_MET	1	0
GRB2_PIK3R1	1	0
GRB2_PTPN11	1	0
GRB2_RB1	1	0
GRB2_RIT1	1	0
GREB1_HRAS	1	0
GREB1_SMAD4	1	0
GRIP1_SMAD2	1	0
GRN_RAC1	1	0
GSK3B_KLF5	1	0
GSK3B_RXRA	1	0
GSK3B_TP53	1	0
GSTM4_TP53	1	0
GTF2I_LSM8	1	0
GTF2I_MAP3K3	1	0
GTF2I_MAPK12	1	0
GTF2I_MTUS2	1	0
GTF2I_PIAS2	1	0
GTF2I_Q96EL6	1	0
GTF2I_SRF	1	0
GTF2I_TAB2	1	0
GTF2I_TRAF6	1	0
GTF2I_ZMYM3	1	0
GUSBP1_TP53	1	0
GYPA_KEAP1	1	0
H2AFY_SPOP	1	0
HACE1_RAC1	1	0
HBA1_PTEN	1	0
HBP1_RB1	1	0
HDAC1_RB1	1	0
HDAC1_STAT3	1	0
HDAC1_TP53	1	0
HDGF_SMAD4	1	0
HDLBP_SMAD4	1	0
HEL-S-1_RAF1	1	0
HEL-S-303_STAT3	1	0
HEL-S-45_SMAD2	1	0
HEL-S-47E_RAC1	1	0
HEL-S-72_KRAS	1	0
HEL-S-91N_SMAD2	1	0
HEL112_SMAD4	1	0
HEL117_STK11	1	0
HEL25_TCEB1	1	0
HINFP_TP53	1	0
HIPK2_TP53	1	0
HIST1H3A_HTT	1	0
HIST1H3A_IPO4	1	0
HIST1H3A_KAT2A	1	0
HIST1H3A_KAT2B	1	0
HIST1H3A_NASP	1	0
HIST1H3A_SETD1A	1	0
HIST1H3A_SETD1B	1	0
HIST1H3A_SETD2	1	0
HIST1H3A_SETDB1	1	0
HIST1H3A_SUPT16H	1	0
HIST1H3A_TP53BP1	1	0
HIST1H3A_TRIM24	1	0
HIST1H3A_YEATS2	1	0
HIST1H4A_KAT8	1	0
HIVEP1_SMAD3	1	0
HMG20A_SMAD4	1	0
HNRNPC_KRAS	1	0
HOXB13_IRF4	1	0
HPS4_RAC1	1	0
HRAS_IL24	1	0
HRAS_KRT18	1	0
HRAS_PDE6D	1	0
HRAS_PIK3CD	1	0
HRAS_PIK3CG	1	0
HRAS_Q59GK3	1	0
HRAS_RASA1	1	0
HRAS_RIN1	1	0
HRAS_SHOC2	1	0
HRAS_SOS1	1	0
HRAS_SOS2	1	0
HSH2D_MET	1	0
HSP90AB1_PRKCI	1	0
HSPA8_TP53	1	0
HSPA9_TP53	1	0
HSPA9_XPO1	1	0
HSPB1_TP53	1	0
HTT_SETD2	1	0
HTT_TP53	1	0
HUWE1_SMAD2	1	0
ID1_MYOD1	1	0
ID2_MYOD1	1	0
IFI16_TP53	1	0
IFRD1_RIT1	1	0
IGBP1_PPP6C	1	0
IGSF21_KRAS	1	0
IKZF3_PIK3R1	1	0
IKZF3_RHOA	1	0
IL1RAP_PRKCI	1	0
IL24_KRAS	1	0
IL24_PTEN	1	0
IL24_SMAD4	1	0
ILKAP_SMAD4	1	0
INPPL1_MET	1	0
IQGAP1_RAC1	1	0
IRAK2_SMAD2	1	0
IRF4_PROX1	1	0
IRF4_SPI1	1	0
IRF4_TRAF2	1	0
JADE1_VHL	1	0
JDP2_PGR	1	0
JTB_TCEB1	1	0
JUNB_SMAD4	1	0
KANSL1_SMAD3	1	0
KAT2B_MYOD1	1	0
KAT2B_RB1	1	0
KAT2B_TP53	1	0
KAT5_TP53	1	0
KDM1A_TP53	1	0
KDM2A_SMAD3	1	0
KEAP1_LSM3	1	0
KEAP1_MAD2L1	1	0
KEAP1_MAPKBP1	1	0
KEAP1_NFE2L1	1	0
KEAP1_NUDT4	1	0
KEAP1_OXR1	1	0
KEAP1_PDCD6IP	1	0
KEAP1_PIDD1	1	0
KEAP1_PRKAG1	1	0
KEAP1_PTMA	1	0
KEAP1_PTMAP7	1	0
KEAP1_Q14419	1	0
KEAP1_RECK	1	0
KEAP1_RELA	1	0
KEAP1_SNRPN	1	0
KEAP1_SQSTM1	1	0
KEAP1_TERF1	1	0
KEAP1_TSC22D4	1	0
KEAP1_WDR83	1	0
KEAP1_ZSCAN32	1	0
KHDRBS1_SMAD2	1	0
KIAA0087_TP53	1	0
KIAA1033_SMAD2	1	0
KIAA1107_UBE2D3	1	0
KIF1A_RXRA	1	0
KIT_TXK	1	0
KIT_YES1	1	0
KLF5_WWP1	1	0
KMT2B_SMAD3	1	0
KPNA3_MYOD1	1	0
KPNA3_NFE2L2	1	0
KPNA4_RAC1	1	0
KPNA6_RAC1	1	0
KPNB1_SMAD2	1	0
KRAS_LPAR1	1	0
KRAS_MDFI	1	0
KRAS_MOCS2	1	0
KRAS_MT-CO3	1	0
KRAS_MT-CYB	1	0
KRAS_OSGIN1	1	0
KRAS_PIK3R2	1	0
KRAS_PSMA3	1	0
KRAS_Q8N4Y1	1	0
KRAS_QDPR	1	0
KRAS_RBPMS	1	0
KRAS_RGL2	1	0
KRAS_SERPINB5	1	0
KRAS_SHOC2	1	0
KRAS_THRSP	1	0
KRAS_TNFSF13	1	0
KRAS_UQCRC1	1	0
KRAS_ZDHHC17	1	0
KRT40_RAC1	1	0
LAMA4_TP53	1	0
LAMA5_SMAD2	1	0
LAMTOR5_SMAD4	1	0
LBP_SMAD3	1	0
LHX9_SMAD2	1	0
LITAF_SMAD2	1	0
LMO4_SMAD4	1	0
LRIF1_RIT1	1	0
LTBP3_RAC1	1	0
LTBP4_RAC1	1	0
LUC7L2_PDPK1	1	0
LYPD3_SMAD4	1	0
LZTS2_RAC1	1	0
MAD1L1_MAX	1	0
MAD2L1BP_TP53	1	0
MAFG_NFE2L2	1	0
MAFK_NFE2L2	1	0
MAGEA2_TP53	1	0
MAGEB18_TP53	1	0
MAGI1_RAC1	1	0
MAP2K1_WNK1	1	0
MAP2K3_SMAD2	1	0
MAP2K3_SMAD4	1	0
MAP2K4_MAP3K2	1	0
MAP2K4_MAP3K4	1	0
MAP2K4_MAP3K5	1	0
MAP2K4_MAPK9	1	0
MAP3K1_UBE2D3	1	0
MAPK13_SMAD4	1	0
MAPK14_RB1	1	0
MAPK14_RPS6KA4	1	0
MAPK8_TP53	1	0
MAPK9_TP53	1	0
MAPKAPK2_STAT3	1	0
MAX_MGA	1	0
MAX_MXD1	1	0
MAX_MXD3	1	0
MAX_MXD4	1	0
MAX_MXI1	1	0
MAX_NBLA10317	1	0
MAX_PLEKHA5	1	0
MAX_PLEKHF2	1	0
MAX_PLIN3	1	0
MAX_TAF1	1	0
MAX_TXLNG	1	0
MAX_UNC45A	1	0
MBD1_SMAD3	1	0
MCM3AP_RAC1	1	0
MCM3AP_SMAD3	1	0
MCM7_RB1	1	0
MDFI_VHL	1	0
MED1_RXRA	1	0
MED1_TP53	1	0
MET_NCK1	1	0
MET_NCK2	1	0
MET_PIK3R3	1	0
MET_PLCG2	1	0
MET_PTPN12	1	0
MET_PTPN3	1	0
MET_PTPRG	1	0
MET_PTPRJ	1	0
MET_PTPRO	1	0
MET_SH2B1	1	0
MET_SH2B2	1	0
MET_SH2D1A	1	0
MET_SH2D1B	1	0
MET_SH2D2A	1	0
MET_SH2D3C	1	0
MET_SH3BP2	1	0
MET_SHB	1	0
MET_SHC1	1	0
MET_SHC2	1	0
MET_SHC3	1	0
MET_SHC4	1	0
MET_SHD	1	0
MET_SLA2	1	0
MET_SOCS2	1	0
MET_SOCS5	1	0
MET_SOCS6	1	0
MET_STAP1	1	0
MET_TNS1	1	0
MET_TNS2	1	0
MET_TNS3	1	0
MET_TNS4	1	0
MET_TXK	1	0
MET_VAV2	1	0
MET_VAV3	1	0
MEX3B_SMAD4	1	0
MLF2_TP53	1	0
MOCS2_STK11	1	0
MORF4L1_RB1	1	0
MPHOSPH6_TP53	1	0
MPRIP_RHOA	1	0
MT-CO3_RAC1	1	0
MTF2_SMAD3	1	0
MYO9B_RHOA	1	0
MYOD1_POLR2G	1	0
MYOD1_PSME2	1	0
MYOD1_SMAD7	1	0
NAGK_SMAD2	1	0
NAT8_SMAD4	1	0
NCF1_RAC1	1	0
NCF2_RAC1	1	0
NCL_TP53	1	0
NCOA6_RXRA	1	0
NCOA6_SMAD2	1	0
NCOA6_SMAD3	1	0
NDN_U2AF1	1	0
NEDD4_PTEN	1	0
NEDD4L_SMAD2	1	0
NEDD9_SMAD3	1	0
NEK6_SMAD4	1	0
NELFCD_SMAD4	1	0
NET1_RHOA	1	0
NFE2_NFE2L2	1	0
NFE2L2_PMF1	1	0
NFE2L2_PRKCA	1	0
NFE2L2_RBMX	1	0
NFE2L2_TNNT1	1	0
NFE2L2_UBC	1	0
NFE2L2_WAC	1	0
NFKBIB_RXRA	1	0
NIF3L1_STAT3	1	0
NLK_SMAD4	1	0
NOS2_RAC1	1	0
NOTCH1_SNW1	1	0
NOTCH1_XRCC6	1	0
NR0B2_SMAD4	1	0
NR0B2_TP53	1	0
NR1I2_RXRA	1	0
NR1I3_RXRA	1	0
NR2B1_SMAD2	1	0
NR4A1_SMAD3	1	0
NRAS_RPS20	1	0
NRAS_SHOC2	1	0
NRAS_SMURF2	1	0
NRAS_SRI	1	0
NUAK2_SMAD2	1	0
NUAK2_SMAD4	1	0
NUCB1_XPO1	1	0
NUCB2_XPO1	1	0
NXT2_STAT3	1	0
OCLN_SMAD4	1	0
OGDHL_STAT3	1	0
OS9_SMAD2	1	0
OSGIN1_PTEN	1	0
PAFAH1B3_TP53	1	0
PAK1_SMAD2	1	0
PAK1_SMAD4	1	0
PAPOLA_SMAD2	1	0
PAPPA_SMAD2	1	0
PAPPA_SMAD3	1	0
PAPPA2_SMAD4	1	0
PARK2_RAC1	1	0
PARP1_TP53	1	0
PARP4_SMAD3	1	0
PAX5_TLE4	1	0
PAXIP1_SMAD2	1	0
PBK_SMAD4	1	0
PBK_TP53	1	0
PCBD2_STAT3	1	0
PCDH1_SMAD3	1	0
PCDHA4_TP53	1	0
PCK2_SMAD3	1	0
PDCD5_VHL	1	0
PDPK1_PEA15	1	0
PDPK1_PKN1	1	0
PDPK1_PNN	1	0
PDPK1_PRSS23	1	0
PDPK1_PTPN12	1	0
PDPK1_PTPN22	1	0
PDPK1_PTPRB	1	0
PDPK1_PTPRC	1	0
PDPK1_PTPRG	1	0
PDPK1_PTPRJ	1	0
PDPK1_PTPRK	1	0
PDPK1_PTPRO	1	0
PDPK1_Q96FS5	1	0
PDPK1_SBF1	1	0
PDPK1_XPO7	1	0
PDPK1_XRCC6	1	0
PDPK1_ZC3HC1	1	0
PDPK1_ZDHHC17	1	0
PDPK1_ZNF133	1	0
PEX19_SMAD2	1	0
PGR_PIAS1	1	0
PGR_SRC	1	0
PHB_RB1	1	0
PHB_TP53	1	0
PHC2_SMAD3	1	0
PIAS1_SMAD4	1	0
PIAS1_SPOP	1	0
PIAS1_TP53	1	0
PIAS2_TP53	1	0
PIAS4_TP53	1	0
PIK3CA_PIK3R3	1	0
PIK3R1_PLCG2	1	0
PIK3R1_TPSAB1	1	0
PIK3R1_TPSB2	1	0
PIN1_TP53	1	0
PKIA_XPO1	1	0
PKN1_RAC1	1	0
PKN1_RHOA	1	0
PLA2G12A_RB1	1	0
PLCG2_TP53	1	0
PLD3_STK11	1	0
PLG_SMAD3	1	0
PLG_SMAD4	1	0
PLIN3_SMAD2	1	0
PLK1_RXRA	1	0
PLK1_TP53	1	0
PLK3_TP53	1	0
PLK4_SMAD4	1	0
PNP_TP53	1	0
PPA1_TP53	1	0
PPARD_RXRA	1	0
PPARD_STAT3	1	0
PPARG_RXRA	1	0
PPP1CA_TP53	1	0
PPP1R12C_SMAD3	1	0
PPP1R13L_TP53	1	0
PPP2R1A_PPP2R1B	1	0
PPP2R1A_PPP2R3A	1	0
PPP2R1A_PPP2R3B	1	0
PPP2R1A_PPP2R5A	1	0
PPP2R1A_PPP2R5D	1	0
PPP2R1A_TAB1	1	0
PPP2R2B_SMAD2	1	0
PPP2R2D_SMAD2	1	0
PPP6C_PPP6R1	1	0
PPP6C_PPP6R2	1	0
PPP6C_PPP6R3	1	0
PPP6C_TGFBR1	1	0
PRDM4_SMAD3	1	0
PREX1_RAC1	1	0
PRKAA1_STK11	1	0
PRKAB2_TP53	1	0
PRKCI_PRKCZ	1	0
PRKD2_RXRA	1	0
PRKDC_TP53	1	0
PRMT1_VHL	1	0
PRMT6_RAC1	1	0
PRMT8_VHL	1	0
PROC_PROCR	1	0
PROX1_SMAD3	1	0
PRPF40A_SMAD4	1	0
PSAP_SMAD2	1	0
PSAT1_RAC1	1	0
PSEN1_RHEB	1	0
PSG11S'_SMAD2	1	0
PSG11S'_SMAD4	1	0
PSG2_SMAD4	1	0
PSG9_SMAD2	1	0
PSG9_SMAD4	1	0
PSMD11_SMAD2	1	0
PSMD11_SMAD4	1	0
PSMD11_TP53	1	0
PSMD8_SMAD2	1	0
PTEN_RAA1	1	0
PTEN_SLC9A3R1	1	0
PTEN_UBC	1	0
PTEN_USP13	1	0
PTEN_USP7	1	0
PTEN_UTP14A	1	0
PTK2_RAC1	1	0
PTN_RIT1	1	0
PTPN1_STAT3	1	0
Q13746_TP53	1	0
Q53FC7_TP53	1	0
Q6U7G8_RAC1	1	0
Q7Z4P3_SMAD2	1	0
Q8HHH1_SMAD4	1	0
Q8NAK2_SMAD2	1	0
Q8NBH6_SMAD4	1	0
Q8NC59_SMAD2	1	0
Q8WVM9_TCEB1	1	0
Q96BE0_TP53	1	0
Q9BSD8_RB1	1	0
Q9NRC3_SMAD2	1	0
Q9P0T0_SETD2	1	0
Q9P0T0_SMAD2	1	0
Q9P0T0_SMAD4	1	0
Q9UQS6_SMAD4	1	0
Q9Y3L8_RB1	1	0
RAB13_SMAD4	1	0
RAB25_SMAD4	1	0
RAB2B_SMAD4	1	0
RAB34_SMAD4	1	0
RAB3B_SMAD4	1	0
RAB4A_TP53	1	0
RABGAP1L_RB1	1	0
RAC1_RELA	1	0
RAC1_SH3RF1	1	0
RAC1_SMURF2	1	0
RAC1_SNX26	1	0
RAC1_SNX31	1	0
RAC1_SYNJ2	1	0
RAC1_TIAM1	1	0
RAC1_TRIO	1	0
RAC1_UBC	1	0
RAC1_USH1C	1	0
RAC1_VCAM1	1	0
RAC1_VWF	1	0
RAC2_SMAD4	1	0
RACK1_RHOA	1	0
RAD51_TP53	1	0
RAF1_SFN	1	0
RAF1_YWHAB	1	0
RAF1_YWHAG	1	0
RAF1_YWHAZ	1	0
RALA_SMAD4	1	0
RANBP6_SMAD2	1	0
RANBP9_SMAD2	1	0
RANBP9_SMAD3	1	0
RAP1B_TP53	1	0
RARB_RXRA	1	0
RARB_SMAD2	1	0
RASD2_SMAD2	1	0
RASD2_SMAD4	1	0
RASL12_SMAD2	1	0
RASL12_SMAD4	1	0
RASSF5_SMAD4	1	0
RB1_RBBP4	1	0
RB1_RBBP7	1	0
RB1_RBBP8	1	0
RB1_TP53BP1	1	0
RB1_TRAP1	1	0
RBX1_VHL	1	0
RCC1_TP53	1	0
RCHY1_TP53	1	0
RCN2_XPO1	1	0
RELA_SMAD3	1	0
RELA_SMAD4	1	0
RFWD2_TP53	1	0
RFWD3_UBE2D3	1	0
RFX1_SMAD4	1	0
RGS14_XPO1	1	0
RGS3_SMAD2	1	0
RGS3_SMAD3	1	0
RHEBL1_SMAD2	1	0
RHEBL1_SMAD4	1	0
RHOA_ROCK1	1	0
RHOA_RPN2	1	0
RHOA_RTKN	1	0
RHOA_SMURF1	1	0
RHOA_SMURF2	1	0
RHOA_TGFBR1	1	0
RHOA_TRIP6	1	0
RHOBTB1_SMAD2	1	0
RHOD_SMAD2	1	0
RHOD_SMAD4	1	0
RHOJ_SMAD4	1	0
RIC8A_XPO1	1	0
RIF1_RIT1	1	0
RIOK2_SMAD3	1	0
RIPK2_SMAD4	1	0
RIT1_SMAD2	1	0
RIT1_SMAD3	1	0
RIT1_SMURF1	1	0
RMND5B_SMAD4	1	0
RNF10_UBE2D3	1	0
RNF111_UBE2D3	1	0
RNF123_SMAD2	1	0
RNF138_SMAD4	1	0
RNF14_SMAD4	1	0
RNF31_SMAD3	1	0
RNF43_UBE2D3	1	0
RNPC3_SMAD2	1	0
ROCK1_SMAD2	1	0
RPA1_SMAD3	1	0
RPA2_STAT3	1	0
RPL11_STAT3	1	0
RPL28_SMAD4	1	0
RPS6KA6_RXRA	1	0
RPS9_STAT3	1	0
RRAS2_SMAD4	1	0
RRAS2_SMURF2	1	0
RRM2B_TP53	1	0
RSPH14_SMAD4	1	0
RTN3_SPOP	1	0
RXRA_SMAD2	1	0
RXRA_STAT1	1	0
RXRA_THRA	1	0
RXRA_THRB	1	0
RXRA_TMPRSS3	1	0
RXRA_TRIP4	1	0
RXRA_UBQLN4	1	0
RXRA_VDR	1	0
RXRB_SPOP	1	0
S100A14_SMAD4	1	0
S100A8_TP53	1	0
SAP130_SMAD3	1	0
SASH3_SMAD4	1	0
SAT1_TP53	1	0
SAT2_TGFBR1	1	0
SCAMP1_TP53	1	0
SECISBP2L_SMAD3	1	0
SERPINA1_SMAD4	1	0
SERPINB5_SMAD4	1	0
SERPINB9_TP53	1	0
SERTAD1_TCEB1	1	0
SETD2_SIAH2	1	0
SETD2_TGFBR1	1	0
SIAH1_STAT3	1	0
SIAH2_STAT3	1	0
SIRT1_TP53	1	0
SMAD1_SMAD4	1	0
SMAD2_SMAD9	1	0
SMAD2_SMURF1	1	0
SMAD2_SNAPIN	1	0
SMAD2_SNRNP70	1	0
SMAD2_SQSTM1	1	0
SMAD2_SRI	1	0
SMAD2_ST13	1	0
SMAD2_ST5	1	0
SMAD2_TBC1D1	1	0
SMAD2_TGM2	1	0
SMAD2_TRIM62	1	0
SMAD2_UHMK1	1	0
SMAD2_ZEB2	1	0
SMAD2_ZMYND11	1	0
SMAD2_ZNF41	1	0
SMAD2_ZNHIT6	1	0
SMAD3_SMAD9	1	0
SMAD3_SNRNP70	1	0
SMAD3_SQSTM1	1	0
SMAD3_SVEP1	1	0
SMAD3_TF	1	0
SMAD3_TGM2	1	0
SMAD3_TLR4	1	0
SMAD3_TRIM35	1	0
SMAD3_TSC22D4	1	0
SMAD3_UBQLN4	1	0
SMAD3_USP7	1	0
SMAD3_WEE1	1	0
SMAD3_XRCC6	1	0
SMAD3_ZBTB3	1	0
SMAD3_ZC3H12A	1	0
SMAD3_ZCCHC14	1	0
SMAD3_ZEB2	1	0
SMAD3_ZMYND11	1	0
SMAD3_ZNF251	1	0
SMAD3_ZNF329	1	0
SMAD3_ZNF83	1	0
SMAD4_SMAD5	1	0
SMAD4_SMAD9	1	0
SMAD4_SNRNP70	1	0
SMAD4_SOX12	1	0
SMAD4_SP1	1	0
SMAD4_SQSTM1	1	0
SMAD4_STAT1	1	0
SMAD4_STK11IP	1	0
SMAD4_STK35	1	0
SMAD4_STRADA	1	0
SMAD4_TDG	1	0
SMAD4_TENM3	1	0
SMAD4_TGFBR1	1	0
SMAD4_THRSP	1	0
SMAD4_TM9SF2	1	0
SMAD4_TRIM35	1	0
SMAD4_TSSK3	1	0
SMAD4_UBA52	1	0
SMAD4_UBB	1	0
SMAD4_UBE2I	1	0
SMAD4_UBE2Z	1	0
SMAD4_UHMK1	1	0
SMAD4_UHRF2	1	0
SMAD4_USB1	1	0
SMAD4_XPO5	1	0
SMAD4_ZBED5	1	0
SMAD4_ZMYM2	1	0
SMARCC1_TP53	1	0
SMN1_TP53	1	0
SNRPN_TP53	1	0
SNUPN_XPO1	1	0
SNURF_TP53	1	0
SNURF_UBE2D3	1	0
SOCS2_TCEB1	1	0
SOCS4_TCEB1	1	0
SP1_TP53	1	0
SPOP_SRRM1	1	0
SRI_STAT3	1	0
STAT1_STAT3	1	0
STAT1_TP53	1	0
STAT3_SULT2A1	1	0
STAT3_TDG	1	0
STK11_STRADB	1	0
STK11_STUB1	1	0
STK11_TSG101	1	0
STK11_VPS72	1	0
STUB1_TP53	1	0
[truncated: 3,780 more rows]
