# Supplementary material for: A full-proteome, interaction-specific characterization of mutational hotspots across human cancers
Source: HighWire-hosted journal article supplement (doi:10.1101/gr.275437.121), 2021-12-28
Supplement: Supplementary_Table_5.xlsx [file Supplementary_Table_5.xlsx]

## Sheet: Legend
Supplementary Table 5: Cancer-type-specific network-prioritized hotspots and curated biomarkers in targeted therapy (.xlsx)
The table provides full lists of (1) network-prioritized hotspots in specific cancer types, (2) 106 known SNV biomarkers curated from My Cancer Genome that are used in cancer targeted therapy, and (3) results of drug response analysis.

## Sheet: Network-prioritized_hotspots
Cancer_type	Gene	Hotspot
breast	CDH1	R335
breast	ERBB2	S310
breast	ERBB2	D769
breast	ERBB2	V777
breast	ERBB3	E928
breast	ESR1	Y537
breast	ESR1	D538
breast	FOXA1	I176
breast	FOXA1	D226
breast	FOXA1	H247
breast	FOXA1	S250
breast	TP53	Y107
breast	TP53	Q136
breast	TP53	H179
breast	TP53	Y205
breast	TP53	N239
breast	TP53	S241
breast	TP53	R248
breast	TP53	R249
breast	TP53	R273
breast	TP53	R280
breast	TP53	E286
breast	TP53	R337
breast	TP53	R342
breast	XPO1	E571
headandneck	CDKN2A	E88
headandneck	HRAS	G12
headandneck	HRAS	G13
headandneck	HRAS	Q61
headandneck	NRAS	Q61
headandneck	RHOA	E40
headandneck	TP53	Q136
headandneck	TP53	N239
headandneck	TP53	R248
headandneck	TP53	R273
headandneck	TP53	R280
headandneck	TP53	R342
liver	CTNNB1	D32
liver	CTNNB1	K335
liver	CTNNB1	G34
liver	CTNNB1	I35
liver	CTNNB1	H36
liver	CTNNB1	N387
liver	STAT3	H410
liver	TP53	R249
lung	BRAF	G466
lung	BRAF	V600
lung	BRAF	K601
lung	CDK4	R24
lung	EGFR	L62
lung	EGFR	E709
lung	EGFR	G719
lung	EGFR	A750
lung	EGFR	K754
lung	EGFR	S768
lung	EGFR	L858
lung	EGFR	L861
lung	ERBB2	S310
lung	ERBB2	V659
lung	KEAP1	M110
lung	KEAP1	R470
lung	KRAS	Q61
lung	NFE2L2	E79
lung	NRAS	Q61
lung	PIK3CA	N345
lung	PIK3CA	C420
lung	PIK3CA	E542
lung	PIK3CA	E545
lung	SMAD4	R361
lung	STK11	D194
lung	TP53	G105
lung	TP53	R110
lung	TP53	N131
lung	TP53	K164
lung	TP53	Y205
lung	TP53	N239
lung	TP53	S241
lung	TP53	G244
lung	TP53	R248
lung	TP53	R273
lung	TP53	C277
lung	TP53	R280
lung	TP53	E286
lung	TP53	Q331
lung	TP53	R337
lung	TP53	R342
bowel	BCL6	R594
bowel	BRAF	G466
bowel	BRAF	V600
bowel	CTNNB1	W383
bowel	ERBB2	S310
bowel	ERBB2	V777
bowel	ERBB3	S846
bowel	KRAS	G60
bowel	KRAS	Q61
bowel	MAX	R60
bowel	NRAS	Q61
bowel	PIK3CA	V344
bowel	PIK3CA	N345
bowel	PIK3CA	R357
bowel	PIK3CA	C420
bowel	PIK3CA	E542
bowel	PIK3CA	E545
bowel	PIK3CA	Q546
bowel	PIK3R1	N564
bowel	PIK3R1	K567
bowel	PRKCI	R480
bowel	PTEN	R233
bowel	RHOA	T37
bowel	SMAD2	T303
bowel	SMAD2	P305
bowel	SMAD2	R321
bowel	SMAD2	C463
bowel	SMAD3	R268
bowel	SMAD4	P356
bowel	SMAD4	R361
bowel	SMAD4	D537
bowel	TP53	P152
bowel	TP53	H168
bowel	TP53	P190
bowel	TP53	Y205
bowel	TP53	S241
bowel	TP53	R248
bowel	TP53	R273
bowel	TP53	E286
bowel	TP53	R342
esophagusstomach	CDH1	D254
esophagusstomach	CDKN2A	D84
esophagusstomach	ERBB2	S310
esophagusstomach	ERBB2	D769
esophagusstomach	ERBB2	V777
esophagusstomach	KRAS	Q61
esophagusstomach	NFE2L2	E79
esophagusstomach	PAX5	V26
esophagusstomach	PIK3CA	N345
esophagusstomach	PIK3CA	E542
esophagusstomach	PIK3CA	E545
esophagusstomach	PIK3CA	Q546
esophagusstomach	RHOA	Y34
esophagusstomach	RHOA	R5
esophagusstomach	SMAD4	P356
esophagusstomach	SMAD4	R361
esophagusstomach	TP53	Y205
esophagusstomach	TP53	S241
esophagusstomach	TP53	G244
esophagusstomach	TP53	R248
esophagusstomach	TP53	R273
esophagusstomach	TP53	E286
esophagusstomach	TP53	R342
thyroid	HRAS	Q61
thyroid	KRAS	Q61
thyroid	PIK3CA	E545
prostate	AR	W741
kidney	MET	F1200
kidney	MET	Y1230
kidney	TCEB1	Y79
kidney	TP53	R273

## Sheet: Known_SNV_biomarkers
Gene	Site
ABL1	E255
ABL1	F317
ABL1	F359
ABL1	T315
ABL1	V299
ABL1	Y253
ALK	C1156
ALK	F1174
ALK	G1202
ALK	G1269
ALK	L1152
ALK	L1196
ALK	S1206
BRAF	V600
BRAF	Y472
EGFR	G719
EGFR	L858
EGFR	L861
EGFR	S768
EGFR	T790
ERBB2	D769
ERBB2	I767
ERBB2	L755
ERBB2	R868
ERBB2	S310
ERBB2	T862
ERBB2	V659
ERBB2	V777
ERBB2	V842
ESR1	D538
ESR1	E380
ESR1	L536
ESR1	P535
ESR1	R555
ESR1	S463
ESR1	V392
ESR1	V533
ESR1	V534
ESR1	Y537
FGFR3	G370
FGFR3	R248
FGFR3	S249
FGFR3	Y373
IDH1	R132
IDH2	R140
IDH2	R172
KIT	A829
KIT	D816
KIT	D820
KIT	E490
KIT	H697
KIT	K550
KIT	K558
KIT	K642
KIT	L576
KIT	N822
KIT	V559
KIT	V560
KIT	V654
KIT	W557
KIT	Y553
KRAS	A146
KRAS	A59
KRAS	D119
KRAS	D33
KRAS	F156
KRAS	F28
KRAS	G12
KRAS	G13
KRAS	G60
KRAS	K117
KRAS	K147
KRAS	K5
KRAS	L19
KRAS	N116
KRAS	P34
KRAS	Q22
KRAS	Q61
KRAS	T58
KRAS	T74
KRAS	V14
KRAS	Y71
NRAS	A146
NRAS	A59
NRAS	G12
NRAS	G13
NRAS	G60
NRAS	K117
NRAS	Q61
NTRK1	A608
NTRK1	F589
NTRK1	G595
NTRK3	F617
NTRK3	G623
NTRK3	G696
PDGFRA	D842
PIK3CA	C420
PIK3CA	E542
PIK3CA	E545
PIK3CA	H1047
PIK3CA	Q546
RET	C634
RET	M918
ROS1	D2033
ROS1	G2032
SMO	D473

## Sheet: Drug_responses
Drug_name	Hotspot	Effect_size	P-value	FDR	Known_SNV_biomarker
Dabrafenib	BRAF_V600	-2.70083	1.48271e-110	1.54084e-106	1
PLX4720 (rescreen)	BRAF_V600	-2.23622	3.98578e-79	2.07101e-75	1
PLX4720	BRAF_V600	-2.16601	3.63916e-63	1.2606e-59	1
SB590885	BRAF_V600	-2.16198	3.20211e-58	8.31907e-55	1
(5Z)-7-Oxozeaenol	BRAF_V600	-1.63171	1.64489e-40	3.41873e-37	1
RDEA119 (rescreen)	BRAF_V600	-1.55071	6.95184e-40	1.20406e-36	1
AZD6244	BRAF_V600	-1.55602	3.16268e-39	4.69522e-36	1
Trametinib	BRAF_V600	-1.3616	7.27401e-32	9.44894e-29	1
RDEA119	BRAF_V600	-1.33996	1.21658e-27	1.40475e-24	1
PD-0325901	BRAF_V600	-1.35357	1.57901e-26	1.6409e-23	1
CI-1040	BRAF_V600	-1.27547	9.18779e-24	8.67996e-21	1
AZ628	BRAF_V600	-1.82052	4.20292e-20	3.63973e-17	1
RDEA119	NRAS_Q61	-1.19828	1.34036e-18	1.07146e-15	1
PD-0325901	NRAS_Q61	-1.19172	2.40987e-17	1.78881e-14	1
VX-11e	BRAF_V600	-0.959227	2.15094e-15	1.49017e-12	1
AZD6244	NRAS_Q61	-1.06025	8.75642e-15	5.68729e-12	1
RDEA119 (rescreen)	NRAS_Q61	-1.05354	1.2316e-14	7.52869e-12	1
CI-1040	NRAS_Q61	-1.07923	3.7867e-14	2.18619e-11	1
Trametinib	NRAS_Q61	-0.986299	6.09783e-14	3.33519e-11	1
AZD6244	BRAF_V600	-1.06135	2.04393e-13	1.06202e-10	1
PLX4720 (rescreen)	BRAF_V600	-2.13125	2.69504e-10	1.33366e-07	1
AS605240	NRAS_Q61	-0.879524	3.51863e-09	1.66207e-06	1
AZ628	NRAS_Q61	-1.10824	1.12474e-08	5.08186e-06	1
Nutlin-3a	BRAF_V600	-0.715488	2.97548e-08	1.28838e-05	1
UNC0638	FBXW7_R479	1.92214	5.11474e-08	2.12609e-05	0
VX-11e	NRAS_Q61	-0.785588	8.39206e-08	3.35424e-05	1
17-AAG	BRAF_V600	-0.651672	1.9437e-07	7.4811e-05	1
NVP-BHG712	BRAF_V600	-0.549975	2.56495e-07	9.51963e-05	1
Dabrafenib	BRAF_V600	-2.00634	2.83246e-07	0.0001015	1
TG101348	BRAF_V600	0.551899	4.7137e-07	0.000163283	1
GSK690693	XPO1_E571	-1.65292	9.16077e-07	0.000307093	0
GW-2580	TP53_G244	-1.81044	1.06212e-06	0.000344922	0
Obatoclax Mesylate	BRAF_V600	-0.637167	1.31715e-06	0.000414782	1
PLX4720	BRAF_V600	-1.78502	2.11815e-06	0.000647406	1
Afatinib (rescreen)	BRAF_V600	0.577379	2.41096e-06	0.000715847	1
Nutlin-3a	TP53_R273	0.62274	7.74449e-06	0.00223558	0
KIN001-260	FBXW7_R479	1.50708	9.95767e-06	0.00279676	0
CP724714	TP53_P152	-2.42776	1.06141e-05	0.00290268	0
PLX4720 (rescreen)	CDK4_R24	-2.14958	1.58172e-05	0.00421467	0
QL-X-138	BRAF_V600	0.513935	1.93989e-05	0.00503983	1
AS605240	BRAF_V600	-0.540248	2.11621e-05	0.00536382	1
CP466722	BRAF_V600	0.498689	2.22717e-05	0.00551065	1
(5Z)-7-Oxozeaenol	NRAS_Q61	-0.598	2.65596e-05	0.00641877	1
PHA-793887	BRAF_V600	0.447574	3.11255e-05	0.00735129	1
UNC1215	FBXW7_R479	1.58864	3.42134e-05	0.00790102	0
FR-180204	BRAF_V600	-0.482565	3.80195e-05	0.00840636	1
piperlongumine	SMAD4_R361	2.24759	3.74493e-05	0.00840636	0
Afatinib (rescreen)	NRAS_Q61	0.604975	3.95716e-05	0.00856726	1
AZD6244	NRAS_Q61	-0.654424	4.38322e-05	0.00929601	1
AZD6244	NRAS_Q61	-1.98545	4.64869e-05	0.00966184	1
Afatinib	PIK3CA_C420	-2.06475	6.69441e-05	0.0136408	1
Embelin	BRAF_V600	-0.524893	7.2651e-05	0.014519	1
FMK	NRAS_Q61	-0.585229	7.49553e-05	0.0145513	1
GSK690693	BRAF_V600	0.446917	7.5613e-05	0.0145513	1
OSI-930	FBXW7_R479	1.44152	8.43503e-05	0.0159376	0
THZ-2-49	FBXW7_R479	1.37665	8.93333e-05	0.0165777	0
NPK76-II-72-1	FBXW7_R479	1.34272	9.23494e-05	0.0168368	0
ABT-869	U2AF1_S34	-1.7383	0.00010134	0.0181574	0
BMS-708163	XPO1_E571	-1.37441	0.000107552	0.0189438	0
TW 37	SMAD4_R361	2.0811	0.000119744	0.0207396	0
UNC0638	STK11_S216	1.50184	0.000148329	0.0252694	0
Trametinib	NRAS_Q61	-1.81899	0.000171834	0.0288015	1
EKB-569	BRAF_V600	0.459681	0.000191782	0.028884	1
UNC0638	FBXW7_R479	1.32615	0.000181549	0.028884	0
XMD14-99	FBXW7_R479	1.29671	0.000188871	0.028884	0
Zibotentan, ZD4054	FBXW7_R479	1.43947	0.000190155	0.028884	0
EX-527	FBXW7_R479	1.48329	0.000186242	0.028884	0
CCT018159	FBXW7_R479	1.75182	0.000190833	0.028884	0
KIN001-102	BRAF_V600	0.403071	0.00018188	0.028884	1
Dabrafenib	CDK4_R24	-1.71302	0.000222165	0.032982	0
KIN001-236	FBXW7_R479	1.30543	0.000238269	0.033919	0
THZ-2-102-1	FBXW7_R479	1.40633	0.000234306	0.033919	0
TW 37	CTNNB1_S37	-1.98563	0.000237846	0.033919	0
TG101348	FBXW7_R479	1.30114	0.000263582	0.0370154	0
SB-505124	FBXW7_R479	1.52047	0.000267668	0.037088	0
PIK-93	FBXW7_R479	1.27299	0.000297981	0.040745	0
BMS-708163	FBXW7_R479	1.39459	0.000307873	0.0415508	0
YM201636	FBXW7_R479	1.36804	0.000317065	0.0417081	0
KIN001-236	XPO1_E571	-1.17047	0.000313335	0.0417081	0
GW-2580	TP53_G244	-1.95101	0.000339543	0.0430309	0
NPK76-II-72-1	BRAF_V600	0.376603	0.000338393	0.0430309	1
Methotrexate	TP53_R282	0.930991	0.000339136	0.0430309	0
NVP-BHG712	NRAS_Q61	-0.466302	0.000343934	0.0430622	1
IOX2	CTNNB1_S37	-1.72985	0.000355031	0.0434057	0
JW-7-24-1	TP53_R110	1.21708	0.000351954	0.0434057	0
PHA-793887	XPO1_E571	-1.14188	0.000374752	0.045284	0
LFM-A13	FBXW7_R479	1.6781	0.000383887	0.0458547	0
Bicalutamide	FBXW7_R479	1.61816	0.000390613	0.0461279	0
XMD15-27	FBXW7_R479	1.34192	0.000428333	0.0500138	0
RDEA119 (rescreen)	TP53_R248	1.3973	0.000436066	0.0503511	0
Tamoxifen	FBXW7_R479	1.40766	0.000441749	0.0504467	0
DMOG	TP53_R249	-1.57789	0.000465022	0.0525273	0
CAY10603	FBXW7_R479	1.33335	0.000484471	0.0541357	0
SB52334	BRAF_V600	-0.427391	0.000531331	0.0569244	1
UNC0638	STK11_S216	1.36177	0.000533134	0.0569244	0
QL-X-138	TP53_R110	1.21852	0.000527783	0.0569244	0
FH535	BRAF_V600	-0.458604	0.000523643	0.0569244	1
SB590885	BRAF_V600	-1.40776	0.000536816	0.0569244	1
Genentech Cpd 10	BRAF_V600	0.40267	0.000564514	0.0592569	1
RDEA119 (rescreen)	NRAS_Q61	-1.6849	0.000579715	0.0594263	1
GSK429286A	FBXW7_R479	1.2862	0.000577991	0.0594263	0
Docetaxel	BRAF_V600	-0.44152	0.000583283	0.0594263	1
TAK-715	TP53_R282	1.00934	0.000619176	0.0624706	0
Afatinib	NRAS_Q61	0.509567	0.000635344	0.0634856	1
QL-XI-92	FBXW7_R479	1.24065	0.000648492	0.0635766	0
THZ-2-49	TP53_R110	1.09734	0.000642399	0.0635766	0
CHIR-99021	BRAF_V600	-0.463854	0.000678218	0.0655111	1
Vinorelbine	FBXW7_R479	1.64243	0.000680831	0.0655111	0
JW-7-24-1	BRAF_V600	0.3867	0.000712535	0.0679327	1
UNC0638	BRAF_V600	-0.357642	0.000774595	0.0731781	1
BAY 61-3606	FBXW7_R479	1.55302	0.000806733	0.0755277	0
BIX02189	STK11_S216	1.32361	0.000830687	0.0770759	0
SGC0946	FBXW7_R479	1.37876	0.000872698	0.0802574	0
Obatoclax Mesylate	NRAS_Q61	-0.519465	0.00089268	0.0813748	1
Nutlin-3a	PPP2R1A_R183	-1.68791	0.00090729	0.0819875	0
ZG-10	PIK3CA_E542	1.09278	0.000928982	0.0832239	1
PD-0325901	NRAS_Q61	-1.60628	0.000996969	0.0885513	1
QL-XII-61	SMAD2_R321	-1.90164	0.00102776	0.0897518	0
AICAR	FBXW7_R479	1.42358	0.00102069	0.0897518	0
KIN001-270	FBXW7_R479	1.21186	0.00104583	0.0905685	0
Vismodegib	RAC1_P29	-1.7065	0.00107045	0.0919349	0
RDEA119	NRAS_Q61	-1.57239	0.0010877	0.0921129	1
Tipifarnib	CTNNB1_S37	-1.59138	0.00109025	0.0921129	0
(5Z)-7-Oxozeaenol	TP53_R248	0.389473	0.00114079	0.0956057	0
Docetaxel	BRAF_V600	-1.27053	0.0012	0.0966697	1
Vorinostat	TP53_H179	0.922588	0.00116753	0.0966697	0
Temozolomide	FBXW7_R479	1.26702	0.00119934	0.0966697	0
CCT018159	SMAD4_R361	1.75216	0.00119741	0.0966697	0
GSK1070916	XPO1_E571	-1.13994	0.00117873	0.0966697	0
ABT-888	XPO1_E571	-1.32765	0.00127493	0.100371	0
IPA-3	SMAD4_R361	1.69541	0.00126896	0.100371	0
Cetuximab	TP53_H179	-1.10667	0.00127191	0.100371	0
Midostaurin	FBXW7_R479	1.54096	0.00129339	0.101059	0
AC220	U2AF1_S34	-1.36145	0.00130385	0.101116	0
JQ12	CTNNB1_S33	1.7908	0.00133462	0.102736	0
TW 37	FBXW7_R479	1.34427	0.00135189	0.103301	0
PAC-1	XPO1_E571	-1.20035	0.00141301	0.106863	0
CP724714	TP53_G262	-1.52646	0.00141909	0.106863	0
XL-184	FBXW7_R479	1.29823	0.00143174	0.107041	0
KIN001-266	FBXW7_R479	1.29935	0.00153286	0.112975	0
BMS-509744	FBXW7_R479	1.77475	0.00152955	0.112975	0
FR-180204	FBXW7_R479	1.23186	0.00154508	0.113074	0
LFM-A13	PIK3CA_E542	0.99821	0.00159035	0.115573	1
FMK	CTNNB1_S37	-1.33989	0.00161123	0.116277	0
TAK-715	BRAF_V600	0.357051	0.00170171	0.118812	1
JNJ-26854165	FBXW7_R479	1.30581	0.00170394	0.118812	0
BIX02189	TP53_R110	1.016	0.0016745	0.118812	0
AS601245	CTNNB1_S37	-1.52793	0.00171495	0.118812	0
Tubastatin A	FBXW7_R479	1.0932	0.00168646	0.118812	0
BMS-708163	RAC1_P29	-1.80003	0.00169552	0.118812	0
Afatinib (rescreen)	CTNNB1_S37	-1.40243	0.00175115	0.120516	0
UNC0638	PIK3CA_E542	0.744849	0.00177629	0.121442	1
MP470	TP53_G262	-1.45514	0.00179969	0.121444	0
CI-1040	TP53_S241	1.09203	0.00179472	0.121444	0
XL-880	NRAS_Q61	0.463674	0.00182027	0.12204	1
TL-1-85	TP53_R110	0.94424	0.00185091	0.123299	0
FMK	FBXW7_R479	1.53021	0.00189033	0.125123	0
Tubastatin A	TP53_H179	0.805126	0.00195781	0.127038	0
BIX02189	FBXW7_R479	1.09492	0.00201413	0.127038	0
PI-103	SMAD2_R321	1.53356	0.00199852	0.127038	0
Y-39983	FBXW7_R479	1.14629	0.00201423	0.127038	0
Genentech Cpd 10	STK11_S216	1.3159	0.0020234	0.127038	0
KIN001-055	CTNNB1_S37	-1.43573	0.00195736	0.127038	0
QL-XII-47	STK11_S216	1.4229	0.00202929	0.127038	0
AZD7762	TP53_R248	1.23457	0.0020136	0.127038	0
PFI-1	NRAS_Q61	-0.469831	0.00200828	0.127038	1
EX-527	BRAF_V600	-0.373262	0.00205515	0.127887	1
UNC0638	CDK4_R24	-1.39311	0.002148	0.132869	0
PAC-1	FBXW7_R479	1.28679	0.00220224	0.134621	0
CP466722	STK11_S216	1.31187	0.00220153	0.134621	0
NG-25	FBXW7_R479	1.06211	0.00223046	0.135549	0
PXD101, Belinostat	SMAD2_R321	1.76401	0.0024074	0.145452	0
BX-912	FBXW7_R479	1.09002	0.00245537	0.147493	0
Nilotinib	TP53_R273	0.346904	0.00253968	0.15168	0
MP470	XPO1_E571	-1.15234	0.00255869	0.151943	0
Vinblastine	FBXW7_R479	1.408	0.00260503	0.153815	0
Afatinib	CTNNB1_S37	-1.55511	0.00265942	0.155366	0
AICAR	TP53_R273	0.410902	0.00266119	0.155366	0
AZD8055	TP53_C242	1.19796	0.00268607	0.155694	0
CH5424802	FBXW7_R479	1.10992	0.00269678	0.155694	0
GDC0941	XPO1_E571	-1.30367	0.0027586	0.158141	0
KIN001-260	PIK3CA_E545	0.514688	0.0027696	0.158141	1
UNC0638	SMAD4_R361	1.53699	0.00302417	0.170607	0
AICAR	BRAF_V600	0.374502	0.00303709	0.170607	1
VNLG/124	TP53_R249	-1.18225	0.00303716	0.170607	0
XMD14-99	STK11_S216	1.14714	0.00311955	0.174292	0
PF-562271	FBXW7_R479	1.42058	0.00314902	0.174998	0
TL-2-105	NRAS_Q61	-0.388713	0.00318326	0.175406	1
BX-912	BRAF_V600	0.324372	0.00319474	0.175406	1
TPCA-1	FBXW7_R479	1.06799	0.003207	0.175406	0
Mitomycin C	U2AF1_S34	-1.40201	0.00342785	0.181836	0
Pyrimethamine	NRAS_Q61	0.569252	0.0034046	0.181836	1
AZD-0530	NRAS_Q61	0.620689	0.00337987	0.181836	1
KIN001-260	TP53_R110	0.911246	0.00344704	0.181836	0
KIN001-266	SMAD4_R361	1.67296	0.00341012	0.181836	0
AKT inhibitor VIII	PIK3CA_E545	-0.656368	0.00338179	0.181836	1
CUDC-101	FBXW7_R479	1.15624	0.00343184	0.181836	0
Tubastatin A	STK11_S216	1.13627	0.00348023	0.18238	0
KIN001-055	FBXW7_R479	1.21502	0.00349245	0.18238	0
BMN-673	FBXW7_R479	1.18706	0.00352333	0.183072	0
BMS-754807	FBXW7_R479	1.35486	0.00369374	0.190972	0
Zibotentan, ZD4054	STK11_S216	1.24975	0.00374324	0.192573	0
CI-1040	NRAS_Q61	-1.44187	0.00387036	0.193747	1
Vorinostat	TP53_R248	1.14588	0.00393548	0.193747	0
Masitinib	STK11_S216	1.17166	0.0037954	0.193747	0
Masitinib	TP53_R110	0.953074	0.00390643	0.193747	0
Gefitinib	BRAF_V600	0.382983	0.00387175	0.193747	1
Vorinostat	TP53_C242	1.09816	0.00389887	0.193747	0
SL 0101-1	STK11_S216	1.58459	0.00390244	0.193747	0
Obatoclax Mesylate	TP53_R249	-1.35741	0.00395249	0.193747	0
PLX4720 (rescreen)	FBXW7_R479	1.10817	0.00394203	0.193747	0
YM155	FBXW7_R479	1.2229	0.00382241	0.193747	0
Bexarotene	FBXW7_R479	1.36141	0.00401971	0.196116	0
BMN-673	SMAD4_R361	1.50615	0.00406824	0.196828	0
YM155	SMAD4_R361	1.35753	0.00407217	0.196828	0
KIN001-102	STK11_S216	1.12799	0.00410467	0.19748	0
Methotrexate	BRAF_V600	-1.01765	0.00414631	0.198072	1
WZ-1-84	TP53_R273	-1.6977	0.0041551	0.198072	0
KIN001-266	TP53_R110	1.06971	0.00423447	0.199179	0
BMS-536924	TP53_H179	-1.3566	0.0042358	0.199179	0
FR-180204	TP53_R110	1.01627	0.00422316	0.199179	0
FMK	NRAS_Q61	-1.45558	0.00431006	0.201758	1
AZD6244	HRAS_Q61	-1.34812	0.00437916	0.203162	0
KIN001-102	TP53_R110	0.915797	0.00437372	0.203162	0
OSI-027	TP53_R110	1.01367	0.0045116	0.204013	0
UNC0638	TP53_R273	0.901439	0.00456631	0.204013	0
GSK-1904529A	SMAD4_R361	1.60243	0.00441718	0.204013	0
QL-XII-47	TP53_R110	1.069	0.00454105	0.204013	0
Temozolomide	TP53_R249	-0.938305	0.00455708	0.204013	0
Afatinib	BRAF_V600	0.368781	0.00455679	0.204013	1
XAV 939	TP53_G262	-1.54856	0.00459382	0.204013	0
TL-2-105	TP53_P152	-1.297	0.00457725	0.204013	0
Bexarotene	SMAD4_R361	1.55375	0.0044822	0.204013	0
AICAR	PIK3CA_E542	0.822469	0.0045239	0.204013	1
KIN001-244	TP53_R249	-1.21121	0.00466001	0.205198	0
LFM-A13	XPO1_E571	-1.19783	0.00464209	0.205198	0
Thapsigargin	FBXW7_R479	1.37039	0.00471966	0.206948	0
HG-6-64-1	STK11_S216	1.26786	0.00475339	0.207551	0
SN-38	FBXW7_R479	1.15101	0.00478217	0.207934	0
Bicalutamide	SMAD4_R361	1.48492	0.00481608	0.208536	0
TL-1-85	STK11_S216	1.04775	0.00484099	0.208745	0
Tamoxifen	HRAS_Q61	-1.45454	0.00487307	0.20926	0
CAY10603	SMAD2_R321	1.63967	0.00490614	0.209813	0
GSK-1904529A	CTNNB1_S37	-1.37051	0.00494871	0.210201	0
AUY922	TP53_R282	0.955087	0.00496473	0.210201	0
TAK-715	STK11_S216	1.16764	0.00497588	0.210201	0
JQ1	BRAF_V600	-1.11859	0.00504048	0.211661	1
OSI-027	BRAF_V600	0.337927	0.00505118	0.211661	1
PHA-793887	TP53_R110	0.897026	0.00513471	0.2122	0
NPK76-II-72-1	STK11_S216	1.07414	0.00517065	0.2122	0
Nutlin-3a	TP53_G245	0.667881	0.00512516	0.2122	0
THZ-2-49	PIK3CA_E545	0.495592	0.00518657	0.2122	1
XAV 939	SMAD4_R361	1.53005	0.00515743	0.2122	0
AUY922	BRAF_V600	-0.373605	0.00509548	0.2122	1
IOX2	CDK4_R24	-1.56603	0.00520747	0.21222	0
LFM-A13	SMAD4_R361	1.52267	0.00529874	0.213697	0
KIN001-270	TP53_R249	-1.15312	0.00529892	0.213697	0
Pazopanib	TP53_G245	0.711658	0.00530541	0.213697	0
NG-25	TP53_G245	0.526999	0.00542683	0.217591	0
Y-39983	BRAF_V600	0.314756	0.00545359	0.217591	1
BMS-345541	STK11_S216	1.14567	0.00547585	0.217591	0
GSK269962A	TP53_R248	0.364709	0.00548585	0.217591	0
RDEA119	TP53_G244	0.908192	0.00550925	0.217689	0
NVP-BHG712	TP53_R110	0.888934	0.00558116	0.219695	0
KIN001-270	TP53_H179	0.761649	0.00581894	0.22819	0
JW-7-24-1	STK11_S216	1.14934	0.00590638	0.229999	0
17-AAG	CDK4_R24	-1.35648	0.00593146	0.229999	0
YM155	SMAD2_R321	1.50172	0.00591833	0.229999	0
THZ-2-49	TP53_H179	0.722827	0.00596368	0.230389	0
SB52334	RAC1_P29	-1.43009	0.00606214	0.230397	0
CH5424802	TP53_G244	-0.923555	0.00612203	0.230397	0
TPCA-1	PIK3CA_E545	0.50119	0.00610215	0.230397	1
AV-951	STK11_S216	1.14315	0.00609193	0.230397	0
Olaparib (rescreen)	TP53_R248	0.353817	0.00614126	0.230397	0
Epothilone B	CTNNB1_S37	-1.32515	0.00611594	0.230397	0
Y-39983	TP53_R249	-1.13664	0.00612213	0.230397	0
TL-2-105	STK11_S216	1.09305	0.00599667	0.230397	0
GW 441756	TP53_R248	1.11508	0.00616513	0.23046	0
UNC0638	TP53_M237	0.962432	0.0062606	0.231982	0
Tubastatin A	PIK3CA_E542	0.674747	0.00627281	0.231982	1
Pazopanib	FBXW7_R479	1.29822	0.00625431	0.231982	0
KIN001-055	TP53_R110	1.03547	0.00631247	0.232621	0
Axitinib	BRAF_V600	0.349309	0.00644423	0.236638	1
QS11	FBXW7_R479	1.28458	0.00647336	0.23687	0
IPA-3	NRAS_Q61	-0.406265	0.00655617	0.237393	1
Shikonin	STK11_S216	1.2779	0.00654986	0.237393	0
ABT-263	TP53_G244	-1.39845	0.00653837	0.237393	0
AR-42	FBXW7_R479	1.05131	0.00671068	0.23813	0
Nutlin-3a	TP53_H179	0.802086	0.00680653	0.23813	0
(5Z)-7-Oxozeaenol	TP53_R248	1.08997	0.00689201	0.23813	0
PLX4720 (rescreen)	SMAD4_R361	1.33822	0.00689734	0.23813	0
MPS-1-IN-1	FBXW7_R479	0.996701	0.00688754	0.23813	0
ZSTK474	TP53_G245	0.571771	0.00669456	0.23813	0
KIN001-244	SMAD4_R361	1.47184	0.00681343	0.23813	0
WZ3105	FBXW7_R479	0.978465	0.0067723	0.23813	0
Bleomycin (50 uM)	SMAD4_R361	1.38444	0.00688486	0.23813	0
JNK-9L	TP53_R280	1.51745	0.00682077	0.23813	0
AG-014699	FBXW7_R479	1.14041	0.00660783	0.23813	0
JQ12	BRAF_V600	-1.1904	0.00663367	0.23813	1
Vinorelbine	BRAF_V600	-1.119	0.00668713	0.23813	1
CAL-101	XPO1_E571	-0.9353	0.0067232	0.23813	0
Bicalutamide	TP53_R248	1.08876	0.00692986	0.238461	0
HG-5-113-01	TP53_R282	1.4401	0.00698085	0.239422	0
STF-62247	STK11_S216	1.12486	0.00704353	0.240777	0
CUDC-101	TP53_H179	0.794348	0.00715445	0.243767	0
Methotrexate	TP53_G244	-1.3952	0.00717995	0.243837	0
GDC0941	BRAF_V600	0.388559	0.00722042	0.244413	1
JNK-9L	NRAS_Q61	-0.427268	0.00726375	0.245081	1
PXD101, Belinostat	TP53_R110	0.978579	0.00740907	0.24525	0
NG-25	STK11_S216	1.03987	0.00739588	0.24525	0
UNC0638	TP53_R280	1.21567	0.00738624	0.24525	0
Olaparib (rescreen)	CDK4_R24	-1.43014	0.00741038	0.24525	0
BMN-673	CDK4_R24	-1.40058	0.00736353	0.24525	0
CEP-701	TP53_H179	0.811068	0.00737431	0.24525	0
CEP-701	TP53_R248	1.05555	0.00749316	0.247203	0
DMOG	TP53_S241	-1.19822	0.0075536	0.248408	0
NSC-207895	TP53_G244	-0.96762	0.00758736	0.248731	0
AP-24534	NFE2L2_D77	-1.15018	0.00761903	0.248984	0
Genentech Cpd 10	CTNNB1_S37	-1.13461	0.00765112	0.249249	0
Embelin	FBXW7_R479	1.2632	0.00767633	0.249289	0
MLN4924	BRAF_V600	-1.15322	0.00773535	0.250423	1
SB-715992	CTNNB1_S37	-1.16584	0.00784738	0.250923	0
XMD11-85h	PPP2R1A_R183	-1.40428	0.00784251	0.250923	0
NU-7441	TP53_R248	1.08317	0.00780262	0.250923	0
ZM-447439	XPO1_E571	-1.11618	0.00781224	0.250923	0
TPCA-1	TP53_R110	0.878755	0.00791977	0.251924	0
LY317615	TP53_R248	-0.330569	0.00792715	0.251924	0
AMG-706	FBXW7_R479	1.28815	0.00799331	0.253211	0
Shikonin	CDK4_R24	1.43627	0.00801641	0.253211	0
ATRA	TP53_G245	0.610414	0.00805962	0.253805	0
BMS-708163	FBXW7_R479	1.17857	0.00817023	0.255738	0
TL-2-105	BRAF_V600	0.287926	0.00815861	0.255738	1
YM201636	TP53_G245	0.54809	0.00820764	0.256138	0
SL 0101-1	FBXW7_R479	1.44977	0.00828127	0.256893	0
Midostaurin	TP53_R248	1.55746	0.00826349	0.256893	0
KIN001-236	TP53_H179	0.698847	0.00848444	0.26107	0
UNC1215	TP53_R282	0.922832	0.00848313	0.26107	0
KIN001-236	TP53_R110	0.852811	0.0084913	0.26107	0
TPCA-1	SMAD2_R321	1.22671	0.00861202	0.262452	0
Pazopanib	SMAD4_R361	1.44207	0.00857177	0.262452	0
GSK2126458	XPO1_E571	-0.951436	0.00859992	0.262452	0
SB 216763	TP53_R248	-0.38712	0.00864479	0.26268	0
CHIR-99021	BRAF_V600	-0.341642	0.00873136	0.264312	1
TPCA-1	TP53_G245	0.518569	0.0087748	0.264312	0
ABT-263	TP53_H179	0.698401	0.00877221	0.264312	0
AV-951	FBXW7_R479	0.977236	0.00881876	0.264627	0
Vismodegib	TP53_R248	-1.54596	0.00883617	0.264627	0
YK 4-279	STK11_S216	1.45742	0.00887755	0.264696	0
PD-173074	BRAF_V600	0.351072	0.00888944	0.264696	1
SGC0946	SMAD4_R361	1.39436	0.00899868	0.267184	0
GSK429286A	PIK3CA_E542	0.692079	0.00903699	0.267557	1
NSC-207895	TP53_R110	0.942677	0.00909246	0.268411	0
KIN001-236	STK11_S216	1.03537	0.00911752	0.268411	0
KU-55933	TP53_R248	1.04532	0.00925048	0.271556	0
Olaparib (rescreen)	SMAD4_R361	1.39432	0.00940433	0.275295	0
PLX4720 (rescreen)	TP53_R248	1.04684	0.0094362	0.275452	0
QL-XI-92	STK11_S216	1.05386	0.00948697	0.276159	0
MPS-1-IN-1	STK11_S216	1.06962	0.00955557	0.276606	0
XMD15-27	TP53_R282	0.781777	0.0095526	0.276606	0
NG-25	TP53_R110	0.820302	0.00959781	0.277057	0
PAC-1	SMAD4_R361	1.25064	0.00965251	0.277864	0
OSI-027	CTNNB1_S37	-1.12664	0.00968357	0.277988	0
Tamoxifen	SMAD4_R361	1.33525	0.00976116	0.279444	0
XMD13-2	BRAF_V600	0.28726	0.00980265	0.27986	1
XL-880	STK11_S216	1.15341	0.00987389	0.27997	0
Ruxolitinib	FBXW7_R479	0.971276	0.00988733	0.27997	0
Gefitinib	PPP2R1A_R183	-1.35049	0.00985918	0.27997	0
UNC0638	TP53_R110	0.833656	0.00992292	0.279982	0
Midostaurin	STK11_S216	1.23261	0.00994161	0.279982	0
PIK-93	TP53_R110	0.827048	0.010007	0.28061	0
AS605240	SMAD4_R361	-1.15378	0.0100622	0.28061	0
Elesclomol	U2AF1_S34	1.38364	0.01005	0.28061	0
NPK76-II-72-1	TP53_R110	0.80709	0.0100887	0.28061	0
QL-VIII-58	TP53_R282	1.36562	0.0101074	0.28061	0
TAK-715	CTNNB1_S37	-1.06615	0.0101259	0.28061	0
UNC0638	BRAF_V600	-0.815655	0.0102395	0.282253	1
KIN001-266	STK11_S216	1.17777	0.0102367	0.282253	0
Tipifarnib	NRAS_Q61	-0.409865	0.0103179	0.282389	1
YM201636	TP53_R110	0.888848	0.0103565	0.282389	0
JQ12	FBXW7_R479	1.24325	0.010277	0.282389	0
WZ3105	XPO1_E571	-0.845993	0.0103803	0.282389	0
FK866	TP53_S241	0.78129	0.01036	0.282389	0
YM201636	STK11_S216	1.08619	0.0105178	0.28243	0
DMOG	NRAS_Q61	-0.382322	0.0104901	0.28243	1
GSK1070916	BRAF_V600	0.276197	0.0104959	0.28243	1
CCT018159	TP53_R248	-1.37033	0.0104168	0.28243	0
AZD8055	XPO1_E571	-1.02331	0.0104738	0.28243	0
CP724714	CTNNB1_S37	-1.22306	0.0106612	0.285067	0
SNX-2112	SMAD2_R321	1.401	0.0106708	0.285067	0
UNC0638	SMAD4_R361	1.00783	0.0107377	0.286119	0
JNK-9L	CTNNB1_S37	-1.23587	0.0109253	0.286493	0
CAL-101	STK11_S216	1.07336	0.0109487	0.286493	0
ZSTK474	XPO1_E571	-0.897745	0.0109999	0.286493	0
XL-184	U2AF1_S34	-1.15817	0.0108659	0.286493	0
XL-880	TP53_R280	1.31346	0.0109799	0.286493	0
GSK-1904529A	FBXW7_R479	1.24477	0.0108123	0.286493	0
PI-103	CTNNB1_S37	-1.09104	0.0109122	0.286493	0
JNJ-26854165	SMAD4_R361	1.36433	0.0109007	0.286493	0
ABT-263	TP53_C242	0.907057	0.0109519	0.286493	0
GSK690693	STK11_S216	1.04516	0.0112127	0.289999	0
SB-505124	STK11_S216	1.18143	0.0111971	0.289999	0
Lenalidomide	XPO1_E571	-0.994583	0.0112182	0.289999	0
BIX02189	SMAD2_R321	1.15772	0.0112669	0.290242	0
MK-2206	XPO1_E571	-1.08773	0.0113272	0.290242	0
TL-1-85	FBXW7_R479	0.842769	0.011326	0.290242	0
AR-42	TP53_H179	0.734387	0.0113393	0.290242	0
AT-7519	BRAF_V600	0.28437	0.0115744	0.293687	1
CUDC-101	TP53_M237	0.998036	0.0116106	0.293687	0
CCT007093	FBXW7_R479	1.08214	0.0116211	0.293687	0
17-AAG	PIK3CA_E545	-0.498848	0.0116435	0.293687	1
GSK429286A	TP53_R273	-0.320948	0.0115796	0.293687	0
Masitinib	FBXW7_R479	0.914368	0.0115986	0.293687	0
Olaparib	TP53_H179	0.766976	0.0117413	0.294013	0
UNC1215	SMAD4_R361	1.24669	0.0117231	0.294013	0
Nutlin-3a	PIK3CA_C420	-1.28382	0.0117099	0.294013	1
Obatoclax Mesylate	TP53_R282	0.840811	0.0117982	0.294022	0
AICAR	TP53_H179	0.729698	0.0117883	0.294022	0
CEP-701	BRAF_V600	-0.328849	0.0118654	0.294355	1
Nutlin-3a	TP53_R248	0.33325	0.0119249	0.294355	0
Bleomycin	CTNNB1_S37	-1.23068	0.0118764	0.294355	0
KIN001-260	STK11_S216	0.959792	0.0119219	0.294355	0
Ruxolitinib	NRAS_Q61	-0.349815	0.0120413	0.295629	1
NVP-BHG712	TP53_G245	0.48159	0.0120242	0.295629	0
GSK-1904529A	XPO1_E571	-1.09619	0.0120618	0.295629	0
SB-715992	STK11_S216	1.10303	0.0122205	0.297184	0
HG-6-64-1	NFE2L2_D77	-1.1251	0.0123994	0.297184	0
SN-38	TP53_R282	0.861213	0.0123684	0.297184	0
XMD15-27	TP53_R273	-1.42619	0.0123078	0.297184	0
MK-2206	PIK3CA_E545	-0.555095	0.0124113	0.297184	1
GW 441756	NRAS_Q61	-0.410159	0.0123866	0.297184	1
Genentech Cpd 10	TP53_R273	0.847997	0.0122345	0.297184	0
BMS-708163	TP53_R273	-0.334722	0.012383	0.297184	0
I-BET	FBXW7_R479	0.850869	0.0121887	0.297184	0
Bosutinib	TP53_S241	0.906902	0.0123483	0.297184	0
CAY10603	SMAD2_R321	1.23059	0.0124684	0.297866	0
XMD13-2	STK11_S216	1.01592	0.0125728	0.299263	0
T0901317	TP53_R249	-1.01377	0.0125845	0.299263	0
YM155	BRAF_V600	-1.08587	0.0128086	0.303898	1
Elesclomol	TP53_S241	0.947237	0.0128653	0.304548	0
FTI-277	CTNNB1_S37	-1.19598	0.0129271	0.304622	0
TL-2-105	TP53_G245	0.482874	0.0129029	0.304622	0
WZ-1-84	BRAF_V600	0.534951	0.0130314	0.306386	1
THZ-2-102-1	SMAD2_R321	1.22303	0.0131308	0.308025	0
ATRA	TP53_R273	-1.30754	0.0131936	0.308801	0
AZD8055	TP53_R248	1.00468	0.0133357	0.310257	0
FH535	NRAS_Q61	-0.383842	0.0133185	0.310257	1
KIN001-236	TP53_G245	0.479754	0.0133752	0.310257	0
Trametinib	TP53_G244	0.798592	0.0133568	0.310257	0
PIK-93	SMAD2_R321	1.12104	0.0134344	0.310937	0
CI-1040	TP53_G244	0.946718	0.0134815	0.311334	0
WZ3105	TP53_R248	-1.44885	0.0135835	0.312992	0
AP-24534	STK11_S216	1.06433	0.0136596	0.31405	0
BX-912	STK11_S216	0.989132	0.0139572	0.314154	0
NPK76-II-72-1	PIK3CA_E542	0.600026	0.0138786	0.314154	1
Afatinib	PPP2R1A_R183	-1.27878	0.0136954	0.314154	0
BIX02189	TP53_G245	0.476325	0.0137658	0.314154	0
TL-1-85	TP53_H179	0.612501	0.0137665	0.314154	0
XL-184	NRAS_Q61	0.368365	0.0139459	0.314154	1
Imatinib	PIK3CA_E545	-0.896959	0.0139656	0.314154	1
XL-184	STK11_S216	1.1201	0.0139226	0.314154	0
XL-880	U2AF1_S34	-1.09696	0.0139664	0.314154	0
FK866	NRAS_Q61	1.2062	0.0138621	0.314154	1
CX-5461	STK11_S216	1.05224	0.01408	0.316025	0
VX-702	PIK3CA_E542	0.721757	0.0141567	0.316915	1
NSC-207895	CTNNB1_S37	-1.25381	0.0141807	0.316915	0
Bicalutamide	STK11_S216	1.11813	0.0143347	0.31967	0
IOX2	FBXW7_R479	1.06513	0.0144424	0.320696	0
VNLG/124	FBXW7_R479	0.872427	0.0144418	0.320696	0
TPCA-1	SMAD2_R321	1.34193	0.0144819	0.320887	0
KIN001-244	SMAD4_R361	1.04354	0.0147282	0.325649	0
HG-6-64-1	BRAF_V600	-0.305089	0.0147769	0.326033	1
GSK269962A	TP53_R248	0.970695	0.0148345	0.326609	0
FTI-277	STK11_S216	1.17226	0.0149936	0.329415	0
MK-2206	BRAF_V600	0.350162	0.0151216	0.330828	1
VNLG/124	TP53_G245	0.473163	0.0151208	0.330828	0
TPCA-1	STK11_S216	0.983586	0.0151817	0.331446	0
Temsirolimus	TP53_R273	0.344949	0.0153582	0.33443	0
GSK1070916	STK11_S216	0.949831	0.0153827	0.33443	0
PI-103	SMAD4_R361	1.04141	0.01542	0.33454	0
Gemcitabine	U2AF1_S34	-1.16162	0.0154673	0.334867	0
I-BET	STK11_S216	0.916584	0.0157635	0.339266	0
I-BET	XPO1_E571	-0.74956	0.0157622	0.339266	0
LAQ824	TP53_R273	0.833716	0.0158337	0.339266	0
OSI-906	NRAS_Q61	-0.367849	0.0158167	0.339266	1
HG-6-64-1	CTNNB1_S37	-1.08572	0.0157865	0.339266	0
PHA-793887	PIK3CA_E542	0.60007	0.01597	0.34078	1
Zibotentan, ZD4054	TP53_H179	0.694716	0.0159583	0.34078	0
NSC-207895	TP53_M237	0.956473	0.0160348	0.341229	0
Nilotinib	TP53_R248	-0.26017	0.0160567	0.341229	0
EX-527	RAC1_P29	-1.22605	0.0166278	0.343652	0
EKB-569	CTNNB1_S37	-1.07367	0.0166767	0.343652	0
Bryostatin 1	BRAF_V600	-0.326462	0.0167642	0.343652	1
Lapatinib	TP53_G244	-1.26368	0.0165413	0.343652	0
HG-5-88-01	TP53_M237	1.23984	0.0167659	0.343652	0
Vinorelbine	CTNNB1_S37	-1.15585	0.016752	0.343652	0
LFM-A13	TP53_R248	-1.43704	0.0163827	0.343652	0
piperlongumine	FBXW7_R479	1.015	0.0164651	0.343652	0
QL-XI-92	BRAF_V600	0.266002	0.0165683	0.343652	1
Trametinib	PIK3CA_E545	0.425231	0.0165901	0.343652	1
AC220	FBXW7_R479	0.910061	0.0163751	0.343652	0
Bosutinib	PPP2R1A_R183	-1.22336	0.0165445	0.343652	0
CX-5461	SMAD4_R361	1.28623	0.0164657	0.343652	0
PD-173074	STK11_S216	1.27262	0.0164575	0.343652	0
Thapsigargin	CTNNB1_S37	-1.16213	0.0165997	0.343652	0
KIN001-270	XPO1_E571	-0.811082	0.016277	0.343652	0
PAC-1	U2AF1_S34	-1.00392	0.0167615	0.343652	0
JQ12	TP53_R273	0.834897	0.0164979	0.343652	0
T0901317	TP53_R282	0.687292	0.01686	0.343861	0
NVP-BHG712	TP53_M237	0.83988	0.0168754	0.343861	0
KIN001-102	XPO1_E571	-0.768515	0.0168657	0.343861	0
BMS-536924	PIK3CA_C420	1.29297	0.0169581	0.344871	1
GDC0941	TP53_C242	1.03843	0.0170065	0.345179	0
VX-11e	BRAF_V600	-0.917207	0.0171577	0.346218	1
QL-XI-92	TP53_R110	0.791358	0.017109	0.346218	0
Temozolomide	SMAD4_R361	1.20267	0.0171416	0.346218	0
Bexarotene	NRAS_Q61	-0.370012	0.0171994	0.346389	1
MP470	TP53_R282	0.84202	0.0173686	0.346686	0
AZD6482	TP53_G245	0.601508	0.0172829	0.346686	0
PHA-793887	TP53_R273	-1.32504	0.017381	0.346686	0
PAC-1	TP53_R282	0.707776	0.0173463	0.346686	0
(5Z)-7-Oxozeaenol	TP53_H179	0.721501	0.017292	0.346686	0
PLX4720	TP53_R282	0.783477	0.0175119	0.347583	0
QL-VIII-58	CDK4_R24	-1.25741	0.0175398	0.347583	0
(5Z)-7-Oxozeaenol	TP53_R273	0.306726	0.0175597	0.347583	0
NVP-BHG712	BRAF_V600	-0.942965	0.0175078	0.347583	1
BMS-536924	U2AF1_S34	-1.11465	0.0176056	0.347827	0
ABT-888	SMAD2_R321	-1.25574	0.0179056	0.351192	0
KU-55933	TP53_R282	0.825885	0.0178874	0.351192	0
Bicalutamide	PIK3CA_E545	-1.40429	0.0178804	0.351192	1
AICAR	TP53_R248	-0.304996	0.0179111	0.351192	0
QL-XII-61	XPO1_E571	-1.08073	0.0179919	0.352113	0
MG-132	BRAF_V600	-0.517949	0.0182545	0.355911	1
HG-6-64-1	TP53_R110	0.867009	0.0182283	0.355911	0
PF-562271	STK11_S216	1.13022	0.0188135	0.359856	0
NVP-BHG712	TP53_S241	0.617469	0.0187371	0.359856	0
EKB-569	TP53_S241	0.705921	0.0187935	0.359856	0
NPK76-II-72-1	TP53_R273	-1.26257	0.0189762	0.359856	0
AZD7762	TP53_S241	0.847849	0.0188509	0.359856	0
Obatoclax Mesylate	CTNNB1_S37	-1.10709	0.0186405	0.359856	0
XL-880	PIK3CA_E545	0.473558	0.0189335	0.359856	1
TL-2-105	TP53_R110	0.763637	0.018916	0.359856	0
QL-XII-47	CTNNB1_S37	-1.08301	0.0186518	0.359856	0
PIK-93	STK11_S216	0.922448	0.0189689	0.359856	0
AZD6244	TP53_R248	0.966609	0.0186275	0.359856	0
LY317615	TP53_G262	-1.04966	0.0188213	0.359856	0
JQ1	PPP2R1A_R183	-1.30658	0.0185635	0.359856	0
JQ12	BRAF_V600	-0.318738	0.0187342	0.359856	1
SB52334	FBXW7_R479	0.95184	0.0185198	0.359856	0
17-AAG	TP53_R248	-0.299214	0.019108	0.360884	0
STF-62247	PIK3CA_E542	0.620825	0.0190995	0.360884	1
Methotrexate	TP53_M237	0.769016	0.0191346	0.360884	0
CAL-101	TP53_R248	-0.274459	0.0191897	0.361267	0
CX-5461	XPO1_E571	-0.820049	0.0193243	0.362341	0
BMS-345541	NRAS_Q61	-0.318917	0.0194211	0.362341	1
Shikonin	TP53_G245	0.592107	0.0193371	0.362341	0
JQ12	TP53_R282	0.857138	0.0193936	0.362341	0
PXD101, Belinostat	TP53_H179	0.699376	0.0194059	0.362341	0
GSK-1904529A	TP53_R282	0.808459	0.0195934	0.364533	0
SB52334	CTNNB1_S37	-1.05128	0.0196087	0.364533	0
FTI-277	FBXW7_R479	1.1269	0.0196459	0.364571	0
PXD101, Belinostat	TP53_M237	0.93144	0.020023	0.370908	0
Olaparib (rescreen)	FBXW7_R479	0.966725	0.0202784	0.372679	0
EKB-569	TP53_G245	0.510044	0.0202337	0.372679	0
I-BET	BRAF_V600	-0.819331	0.0202979	0.372679	1
Bortezomib	BRAF_V600	-0.500738	0.0202492	0.372679	1
Methotrexate	PIK3CA_E542	0.569005	0.0202971	0.372679	1
PLX4720	FBXW7_R479	1.01028	0.0203684	0.373284	0
GSK690693	TP53_R248	-0.982808	0.0204027	0.373284	0
Pyrimethamine	BRAF_V600	-0.447376	0.0205162	0.374043	1
TGX221	BRAF_V600	-0.490929	0.0204998	0.374043	1
UNC1215	BRAF_V600	-0.949172	0.0205692	0.374352	1
CUDC-101	TP53_R110	0.834706	0.0206966	0.376013	0
MP470	TP53_G244	-0.883834	0.0207678	0.376063	0
AZD6482	STK11_S216	1.08545	0.020837	0.376063	0
Doxorubicin	FBXW7_R479	1.1364	0.0208307	0.376063	0
BMS-345541	TP53_R282	0.675164	0.0208441	0.376063	0
RDEA119	TP53_R248	0.937939	0.0208877	0.376196	0
Elesclomol	XPO1_E571	0.962391	0.0211401	0.376248	0
PHA-793887	FBXW7_R479	0.809623	0.021144	0.376248	0
RDEA119 (rescreen)	PIK3CA_C420	1.04116	0.0211048	0.376248	1
AZD6482	SMAD4_R361	1.22416	0.021095	0.376248	0
AZD6482	SMAD4_R361	1.2533	0.020939	0.376248	0
PI-103	FBXW7_R479	0.888248	0.0209973	0.376248	0
KIN001-102	TP53_R273	0.745302	0.0210335	0.376248	0
RDEA119 (rescreen)	TP53_G244	0.739557	0.0212306	0.376499	0
Gefitinib	NRAS_Q61	0.346617	0.0212304	0.376499	1
NVP-BEZ235	TP53_R248	0.925985	0.021327	0.377371	0
Vinorelbine	TP53_R282	0.789326	0.0213524	0.377371	0
QL-XII-47	TP53_P152	-1.22065	0.0216457	0.37945	0
TW 37	TP53_R248	0.909001	0.0216265	0.37945	0
PLX4720	CDK4_R24	-1.15497	0.0216136	0.37945	0
QL-XI-92	TP53_M237	0.83481	0.0216133	0.37945	0
PLX4720	TP53_H179	0.668314	0.0216526	0.37945	0
Bosutinib	TP53_R110	-0.8302	0.0217168	0.379934	0
AG-014699	TP53_R248	1.04957	0.0217861	0.380506	0
PD-173074	FBXW7_R479	1.05455	0.0219853	0.381836	0
XMD14-99	TP53_R282	0.629689	0.0220092	0.381836	0
GDC0941	PIK3CA_E545	-0.515058	0.0220016	0.381836	1
Tubastatin A	SMAD4_R361	0.890509	0.0219649	0.381836	0
SB590885	STK11_S216	1.1486	0.0221693	0.383973	0
VNLG/124	TP53_G244	-0.741235	0.0223432	0.386341	0
Afatinib	TP53_R248	-0.302018	0.0224072	0.386803	0
SB590885	PIK3CA_C420	-1.1425	0.0226326	0.387692	1
GSK2126458	TP53_R110	0.823836	0.0228678	0.387692	0
NVP-BHG712	STK11_S216	0.891995	0.0231168	0.387692	0
Mitomycin C	TP53_H179	0.728248	0.0229692	0.387692	0
Cisplatin	TP53_H179	0.710628	0.0231675	0.387692	0
GW-2580	FBXW7_R479	0.925783	0.0230744	0.387692	0
ZG-10	TP53_M237	1.21991	0.0230621	0.387692	0
Cyclopamine	TP53_R273	-0.529102	0.0228402	0.387692	0
CAY10603	TP53_G244	-0.794735	0.02273	0.387692	0
XMD11-85h	PIK3CA_E542	0.741128	0.0231588	0.387692	1
GSK690693	SMAD4_R361	0.934759	0.0230869	0.387692	0
KIN001-244	TP53_R110	0.794549	0.0229527	0.387692	0
PHA-793887	STK11_S216	0.893831	0.0227334	0.387692	0
TL-1-85	PIK3CA_E542	0.538363	0.0225669	0.387692	1
TAK-715	TP53_R249	-0.94914	0.0225685	0.387692	0
VNLG/124	TP53_G244	-1.33942	0.0231422	0.387692	0
Y-39983	PIK3CA_E545	0.425628	0.0228034	0.387692	1
QS11	TP53_R249	-1.07355	0.022982	0.387692	0
Elesclomol	TP53_S241	1.1466	0.0229449	0.387692	0
Tipifarnib	TP53_R249	-1.10755	0.0232725	0.388246	0
NVP-BHG712	FBXW7_R479	0.796434	0.0232753	0.388246	0
KIN001-055	TP53_G245	0.515206	0.0233645	0.388632	0
GNF-2	PIK3CA_E545	-0.865829	0.0233733	0.388632	1
5-Fluorouracil	XPO1_E571	-0.776685	0.0236096	0.391934	0
GSK690693	TP53_R110	0.760457	0.023863	0.393626	0
PXD101, Belinostat	FBXW7_R479	0.90393	0.0238283	0.393626	0
Y-39983	TP53_R110	0.764611	0.0238376	0.393626	0
THZ-2-102-1	PIK3CA_E545	0.435571	0.0238595	0.393626	1
MLN4924	TP53_P152	1.23696	0.0239488	0.394415	0
SNX-2112	SMAD2_R321	1.10383	0.0240717	0.395324	0
PIK-93	CTNNB1_S33	1.02343	0.02408	0.395324	0
Etoposide	FBXW7_R479	1.08648	0.0241511	0.395723	0
UNC0638	TP53_R273	-0.921885	0.0241805	0.395723	0
TAK-715	TP53_G245	0.457877	0.0242721	0.396596	0
AZD7762	BRAF_V600	-0.92265	0.0250301	0.396854	1
Pazopanib	TP53_R249	-1.06377	0.0250601	0.396854	0
Tubastatin A	TP53_R110	0.712614	0.0248823	0.396854	0
AZD6482	FBXW7_R479	1.05568	0.0247779	0.396854	0
Dabrafenib	CTNNB1_S33	-1.03787	0.0249102	0.396854	0
Y-39983	XPO1_E571	-0.76059	0.024896	0.396854	0
Pazopanib	TP53_R248	1.15569	0.0249888	0.396854	0
CP724714	SMAD4_R361	-1.07403	0.0250898	0.396854	0
AZD7762	TP53_R248	-1.36339	0.0247783	0.396854	0
ABT-888	SMAD2_R321	-1.35098	0.0243774	0.396854	0
XAV 939	FBXW7_R479	0.951742	0.0249058	0.396854	0
OSI-930	STK11_S216	0.924555	0.0243907	0.396854	0
GDC0941 (rescreen)	SMAD4_R361	1.25159	0.0249009	0.396854	0
GDC0941 (rescreen)	PIK3CA_E545	-0.501601	0.0250191	0.396854	1
GSK269962A	TP53_R248	0.989887	0.0245046	0.396854	0
VX-11e	CTNNB1_S37	-0.991749	0.024445	0.396854	0
AZD8055	TP53_H179	0.669835	0.0247094	0.396854	0
Z-LLNle-CHO	NRAS_Q61	-0.46152	0.0244507	0.396854	1
EX-527	TP53_R267	-0.891155	0.0248903	0.396854	0
YM155	TP53_R110	0.866059	0.0248357	0.396854	0
XMD15-27	STK11_S216	0.956109	0.0247053	0.396854	0
Trametinib	TP53_R248	0.918411	0.0259681	0.397061	0
Bicalutamide	NFE2L2_D77	-1.21723	0.0255479	0.397061	0
STF-62247	SMAD4_R361	0.931374	0.0255558	0.397061	0
IOX2	BRAF_V600	-0.292824	0.0260848	0.397061	1
CAL-101	TP53_R248	-1.07452	0.0260105	0.397061	0
BIX02189	PIK3CA_E542	0.562951	0.0251867	0.397061	1
LFM-A13	TP53_R273	0.77193	0.0259346	0.397061	0
Afatinib (rescreen)	TP53_H179	-0.709373	0.0260273	0.397061	0
Elesclomol	FBXW7_R479	1.04255	0.0252509	0.397061	0
XL-880	FBXW7_R479	0.88996	0.0260963	0.397061	0
PFI-1	BRAF_V600	-0.915164	0.0257303	0.397061	1
TL-1-85	SMAD2_R321	0.957344	0.0256382	0.397061	0
AP-24534	TP53_G245	0.517114	0.026001	0.397061	0
BMS-708163	STK11_S216	1.28119	0.0255597	0.397061	0
UNC0638	TP53_R248	0.948972	0.0259474	0.397061	0
Epothilone B	FBXW7_R479	1.07926	0.0254886	0.397061	0
NG-25	SMAD2_R321	1.00171	0.0252924	0.397061	0
XL-184	NFE2L2_D77	-1.01155	0.025988	0.397061	0
Trametinib	TP53_R267	-0.786434	0.0259804	0.397061	0
OSU-03012	PIK3CA_E545	-0.471574	0.0260175	0.397061	1
PFI-1	SMAD4_R361	1.18431	0.0253613	0.397061	0
FR-180204	TP53_G245	0.47546	0.0253555	0.397061	0
SB-715992	PIK3CA_E542	0.624035	0.0255787	0.397061	1
FR-180204	BRAF_V600	-0.847941	0.0260172	0.397061	1
LAQ824	CTNNB1_S33	1.20159	0.0253143	0.397061	0
Phenformin	XPO1_E571	-0.769799	0.0256442	0.397061	0
Tubastatin A	PIK3CA_E545	0.389762	0.0262333	0.397762	1
FTI-277	TP53_R267	-0.959291	0.0262155	0.397762	0
EKB-569	XPO1_E571	-0.817704	0.0262572	0.397762	0
IOX2	TP53_R248	-0.299597	0.0263146	0.398051	0
VX-702	TP53_R282	0.691872	0.0264518	0.399545	0
CUDC-101	SMAD2_R321	1.13093	0.0265031	0.39974	0
A-770041	NRAS_Q61	0.465649	0.0267296	0.402571	1
THZ-2-102-1	TP53_R110	0.77331	0.0268004	0.403054	0
Tubastatin A	NRAS_Q61	-0.284834	0.0268603	0.40337	1
Phenformin	TP53_P152	1.0757	0.0271631	0.407328	0
OSI-930	TP53_R248	0.802813	0.0272748	0.407881	0
BMN-673	TP53_R248	0.276113	0.0273569	0.407881	0
JNK Inhibitor VIII	FBXW7_R479	1.07371	0.0272891	0.407881	0
GDC0941 (rescreen)	NRAS_Q61	0.367443	0.0273469	0.407881	1
CAY10603	TP53_G244	-1.29202	0.0274129	0.40813	0
PI-103	TP53_M237	0.846983	0.0274964	0.408204	0
GSK2126458	PIK3CA_E542	-1.29048	0.0274592	0.408204	1
XMD14-99	TP53_G245	0.416776	0.0278991	0.411577	0
KIN001-266	BRAF_V600	-0.27206	0.0285871	0.411577	1
FH535	TP53_R282	0.733575	0.0287198	0.411577	0
TG101348	STK11_S216	0.872318	0.0286485	0.411577	0
CCT007093	TP53_R248	-1.05824	0.028692	0.411577	0
NSC-87877	FBXW7_R479	1.07278	0.0286633	0.411577	0
IPA-3	TP53_R249	-0.99848	0.0287176	0.411577	0
AZ628	BRAF_V600	-1.49881	0.0282947	0.411577	1
Vorinostat	TP53_R282	0.660146	0.0287392	0.411577	0
PF-562271	TP53_R282	0.746984	0.0286035	0.411577	0
Dabrafenib	PIK3CA_E545	0.396695	0.0283519	0.411577	1
ABT-869	FBXW7_R479	0.881404	0.0278541	0.411577	0
JW-7-24-1	CTNNB1_S37	-0.909733	0.0288325	0.411577	0
Mitomycin C	TP53_R273	-1.33618	0.0285046	0.411577	0
XMD13-2	TP53_M237	0.79884	0.0282655	0.411577	0
Obatoclax Mesylate	RAC1_P29	-1.19303	0.0282387	0.411577	0
Dabrafenib	NRAS_Q61	-1.12277	0.0287937	0.411577	1
CUDC-101	SMAD2_R321	1.29009	0.0281645	0.411577	0
ABT-263	TP53_R248	0.896879	0.0278492	0.411577	0
GSK-1904529A	TP53_G244	-0.954622	0.0288169	0.411577	0
Dabrafenib	TP53_S241	0.624888	0.0278504	0.411577	0
NG-25	TP53_H179	0.567737	0.0286635	0.411577	0
Vismodegib	TP53_R282	0.704951	0.0284671	0.411577	0
GDC0941	TP53_R248	0.887661	0.0284002	0.411577	0
KIN001-244	STK11_S216	0.938623	0.0283832	0.411577	0
UNC0638	TP53_R282	0.651112	0.0286535	0.411577	0
KIN001-102	PIK3CA_E542	-1.3197	0.0282648	0.411577	1
Tubastatin A	TP53_G245	0.416798	0.0281911	0.411577	0
OSI-930	TP53_H179	0.599663	0.0291185	0.41258	0
AZD6244	TP53_R248	1.32187	0.0289944	0.41258	0
CI-1040	SMAD2_R321	-1.07748	0.0290793	0.41258	0
AG-014699	SMAD4_R361	1.1805	0.0290542	0.41258	0
THZ-2-49	SMAD4_R361	0.857288	0.0290768	0.41258	0
Dasatinib	TP53_R273	-1.27127	0.0291807	0.41258	0
IOX2	SMAD4_R361	1.22493	0.029141	0.41258	0
Bleomycin (50 uM)	FBXW7_R479	0.86642	0.0293741	0.41278	0
CUDC-101	TP53_G244	-0.786112	0.0293935	0.41278	0
FTI-277	TP53_R282	0.744815	0.02936	0.41278	0
JNK Inhibitor VIII	TP53_R248	0.895751	0.029373	0.41278	0
STF-62247	FBXW7_R479	0.814146	0.0293473	0.41278	0
JW-7-24-1	FBXW7_R479	0.813509	0.0294616	0.413178	0
BMS-345541	FBXW7_R479	0.803522	0.0295094	0.413291	0
CCT018159	TP53_R248	0.975456	0.0295797	0.413717	0
FTI-277	NRAS_Q61	-0.343528	0.0297236	0.415172	1
CI-1040	TP53_S241	1.09291	0.0297682	0.415237	0
CAY10603	TP53_M237	0.830562	0.029889	0.416363	0
TG101348	TP53_R110	0.70659	0.0299822	0.416568	0
piperlongumine	TP53_R248	0.883935	0.0299839	0.416568	0
BMS-345541	CTNNB1_S37	-0.890833	0.0303118	0.419468	0
SN-38	U2AF1_S34	-0.984585	0.0302678	0.419468	0
YK 4-279	FBXW7_R479	1.04748	0.0303137	0.419468	0
CHIR-99021	BRAF_V600	-0.947357	0.0305635	0.421241	1
Tubastatin A	RAC1_P29	-0.967562	0.0305035	0.421241	0
JQ1	TP53_R273	0.749965	0.0305621	0.421241	0
PHA-793887	TP53_R248	-1.27591	0.0307327	0.422574	0
TW 37	SMAD2_R321	1.17047	0.0307415	0.422574	0
FK866	STK11_S216	0.927621	0.0311492	0.427048	0
YM201636	SMAD2_R321	1.05598	0.0311214	0.427048	0
AMG-706	TP53_R248	-1.33518	0.0312115	0.427339	0
AV-951	TP53_R248	-1.30788	0.0313399	0.428531	0
ZG-10	CDK4_R24	-1.15337	0.0316729	0.429834	0
THZ-2-102-1	TP53_M237	0.821991	0.0317085	0.429834	0
VX-702	PPP2R1A_R183	-1.08534	0.0317246	0.429834	0
QS11	NRAS_Q61	-0.332201	0.0316846	0.429834	1
AICAR	CTNNB1_S37	1.0765	0.0316467	0.429834	0
SNX-2112	FBXW7_R479	0.817473	0.0314905	0.429834	0
681640	FBXW7_R479	1.18689	0.0315475	0.429834	0
PIK-93	XPO1_E571	-0.689903	0.0318498	0.430968	0
SN-38	TP53_S241	-1.07234	0.0319861	0.431417	0
Imatinib	FBXW7_R479	1.00736	0.0320076	0.431417	0
CP724714	NRAS_Q61	0.339534	0.0319879	0.431417	1
PI-103	BRAF_V600	0.255641	0.0323206	0.432853	1
Bexarotene	TP53_R249	-1.0148	0.0323224	0.432853	0
AS601245	TP53_R282	0.740134	0.0321875	0.432853	0
PI-103	TP53_R110	0.751816	0.0322196	0.432853	0
XMD13-2	TP53_R273	0.712744	0.0322501	0.432853	0
QL-XI-92	SMAD4_R361	0.869593	0.0324102	0.432913	0
I-BET	NRAS_Q61	-0.26863	0.0323955	0.432913	1
WZ3105	TP53_R110	0.704818	0.0326997	0.435661	0
Bexarotene	STK11_S216	-1.0125	0.0326614	0.435661	0
THZ-2-49	U2AF1_S34	-0.838371	0.0328143	0.436069	0
Bleomycin (50 uM)	PIK3CA_C420	1.09327	0.0328018	0.436069	1
AKT inhibitor VIII	TP53_R249	-1.03233	0.0328932	0.436559	0
GDC0941 (rescreen)	TP53_R248	0.864684	0.0329444	0.436682	0
AUY922	TP53_R110	0.83586	0.0330425	0.437424	0
PLX4720	TP53_R248	0.876777	0.0332708	0.439885	0
rTRAIL	BRAF_V600	-0.280066	0.033324	0.440029	1
Genentech Cpd 10	TP53_R110	0.739746	0.0337038	0.442701	0
FK866	FBXW7_R479	0.817116	0.0337671	0.442701	0
AICAR	PIK3CA_E545	-0.426276	0.0338763	0.442701	1
KIN001-260	TP53_H179	0.541919	0.0336436	0.442701	0
BMS-708163	TP53_R248	0.985155	0.0338605	0.442701	0
Bicalutamide	XPO1_E571	-0.869228	0.0338014	0.442701	0
BIRB 0796	STK11_S216	-1.20188	0.0339718	0.442701	0
KU-55933	XPO1_E571	-0.874604	0.033995	0.442701	0
IPA-3	TP53_G245	0.521417	0.0337732	0.442701	0
KIN001-244	XPO1_E571	-0.742368	0.033995	0.442701	0
YM201636	CTNNB1_S37	-0.899558	0.0337942	0.442701	0
SN-38	TP53_H179	0.730671	0.0341233	0.443817	0
MPS-1-IN-1	PIK3CA_E545	0.394097	0.0343681	0.445859	1
XMD8-92	BRAF_V600	-0.331616	0.0343671	0.445859	1
TL-1-85	BRAF_V600	-0.213055	0.0344091	0.445859	1
Bleomycin	TP53_H179	0.691281	0.0344905	0.446358	0
FR-180204	STK11_S216	0.919536	0.0345952	0.447156	0
Etoposide	TP53_R282	0.721306	0.0346821	0.447722	0
Methotrexate	XPO1_E571	-0.691618	0.0350493	0.449019	0
WZ3105	TP53_R248	-0.236275	0.0350914	0.449019	0
CP466722	TP53_G245	0.441314	0.0351282	0.449019	0
ABT-263	TP53_D259	-0.969068	0.0349703	0.449019	0
T0901317	BRAF_V600	0.233683	0.0351095	0.449019	1
AP-24534	FBXW7_R479	0.910547	0.0349947	0.449019	0
BX-795	TP53_H179	0.650799	0.0349425	0.449019	0
RDEA119 (rescreen)	HRAS_Q61	-0.95494	0.0349526	0.449019	0
BMS-708163	TP53_R249	0.856296	0.0352507	0.450031	0
Axitinib	TP53_R248	0.852722	0.0356157	0.450529	0
BAY 61-3606	XPO1_E571	-0.8728	0.0357232	0.450529	0
Sorafenib	TP53_G245	0.653818	0.0354026	0.450529	0
PD-173074	TP53_H179	0.646066	0.0356779	0.450529	0
CUDC-101	PIK3CA_E542	0.589923	0.0355074	0.450529	1
OSI-930	TP53_R110	0.706267	0.0355405	0.450529	0
ABT-263	BRAF_V600	0.243437	0.0353738	0.450529	1
TL-2-105	FBXW7_R479	0.748761	0.0355587	0.450529	0
TG101348	TP53_M237	0.748812	0.035714	0.450529	0
QL-XII-61	TP53_R273	0.395782	0.0354502	0.450529	0
CH5424802	STK11_S216	0.867568	0.0358188	0.451186	0
YK 4-279	TP53_R110	-0.907294	0.0360156	0.452568	0
JQ12	TP53_R267	-0.908679	0.0359946	0.452568	0
JNK-9L	FBXW7_R479	1.01957	0.0360633	0.452621	0
GSK429286A	STK11_S216	0.874581	0.036171	0.452879	0
JQ1	FBXW7_R479	0.794156	0.0361413	0.452879	0
Nutlin-3a	TP53_S241	0.759022	0.0362511	0.453335	0
XMD8-92	NRAS_Q61	-0.412032	0.0364843	0.455523	1
NPK76-II-72-1	TP53_G245	0.391734	0.0365137	0.455523	0
MPS-1-IN-1	RAC1_P29	-0.995033	0.0365984	0.456032	0
BMS-536924	TP53_R273	0.296146	0.036692	0.456651	0
PF-562271	CTNNB1_S37	-1.00464	0.0367637	0.456995	0
LY317615	TP53_R273	-1.14705	0.0369533	0.458804	0
Cytarabine	PIK3CA_C420	1.10464	0.0373699	0.461111	1
piperlongumine	TP53_H179	0.698285	0.0372202	0.461111	0
NPK76-II-72-1	SMAD2_R321	0.92248	0.0373279	0.461111	0
XMD13-2	TP53_R282	0.599776	0.0374053	0.461111	0
YK 4-279	TP53_R248	0.979426	0.0372808	0.461111	0
CI-1040	PIK3CA_E545	-1.0961	0.0374036	0.461111	1
FMK	PIK3CA_E542	0.594505	0.0375403	0.462226	1
5-Fluorouracil	STK11_S216	0.872288	0.0376209	0.46267	0
PXD101, Belinostat	TP53_G244	-0.759529	0.0376903	0.462975	0
AMG-706	BRAF_V600	-0.856837	0.0382165	0.466253	1
LAQ824	STK11_S216	0.964712	0.0381657	0.466253	0
GSK269962A	FBXW7_R479	0.880964	0.0380545	0.466253	0
AT-7519	TP53_R248	-0.233613	0.0380929	0.466253	0
Methotrexate	RAC1_P29	-0.872608	0.0382263	0.466253	0
(5Z)-7-Oxozeaenol	CDK4_R24	-1.02501	0.038188	0.466253	0
Docetaxel	FBXW7_R479	0.922187	0.0383376	0.467062	0
AZD6244	TP53_G244	0.693839	0.0385363	0.468934	0
PAC-1	TP53_R267	-0.775564	0.0387222	0.470645	0
BAY 61-3606	TP53_G245	0.514625	0.0390758	0.471731	0
AG-014699	TP53_H179	0.645847	0.0391688	0.471731	0
KIN001-102	TP53_R248	-0.22532	0.0390766	0.471731	0
YM201636	TP53_M237	0.784538	0.0389768	0.471731	0
AT-7519	STK11_S216	0.835747	0.0392986	0.471731	0
Obatoclax Mesylate	CTNNB1_S33	1.12098	0.0389531	0.471731	0
Shikonin	TP53_R249	-0.970849	0.0391799	0.471731	0
JQ1	NRAS_Q61	-0.325101	0.039169	0.471731	1
I-BET	TP53_M237	0.7	0.0393109	0.471731	0
JNK-9L	STK11_S216	1.00292	0.03905	0.471731	0
CP724714	TP53_R282	0.701519	0.0392758	0.471731	0
JQ12	TP53_R249	-0.998007	0.0393898	0.472133	0
RDEA119 (rescreen)	BRAF_V600	-0.840728	0.0400783	0.472249	1
OSI-930	U2AF1_S34	-0.844414	0.0397567	0.472249	0
Crizotinib	FBXW7_R479	1.04773	0.0400421	0.472249	0
ZSTK474	TP53_R248	1.09321	0.0396157	0.472249	0
Bryostatin 1	TP53_R248	-0.298823	0.0395324	0.472249	0
CAY10603	TP53_R110	0.71683	0.0400812	0.472249	0
QL-XI-92	SMAD2_R321	0.963866	0.0398762	0.472249	0
Temsirolimus	TP53_H179	0.663662	0.0400793	0.472249	0
PFI-1	TP53_R273	0.751764	0.0397531	0.472249	0
THZ-2-49	SMAD4_R361	1.2445	0.0396546	0.472249	0
GSK-650394	TP53_G244	-0.8902	0.0398165	0.472249	0
Thapsigargin	BRAF_V600	-0.277839	0.0396918	0.472249	1
CP724714	SMAD4_R361	-1.20609	0.0397801	0.472249	0
Vinorelbine	SMAD4_R361	1.14647	0.0400289	0.472249	0
VNLG/124	TP53_H179	0.547363	0.0400726	0.472249	0
QL-XII-61	PIK3CA_E545	0.633216	0.0401319	0.472311	1
Bexarotene	TP53_R248	1.10539	0.040184	0.472389	0
Vismodegib	TP53_H179	0.621036	0.0406747	0.47281	0
SB-715992	TP53_R273	-1.12292	0.0403244	0.47281	0
AZD7762	PIK3CA_E542	0.604548	0.0406576	0.47281	1
ZSTK474	STK11_S216	0.884478	0.0404517	0.47281	0
XAV 939	NRAS_Q61	0.317095	0.0404293	0.47281	1
AP-24534	BRAF_V600	-0.854176	0.0405958	0.47281	1
AKT inhibitor VIII	BRAF_V600	-0.835281	0.0404853	0.47281	1
Bicalutamide	TP53_G244	-0.83616	0.0406711	0.47281	0
ATRA	FBXW7_R479	0.907785	0.0403018	0.47281	0
AC220	TP53_R110	0.709428	0.0405091	0.47281	0
CH5424802	BRAF_V600	-0.747663	0.0408911	0.473255	1
OSI-930	NRAS_Q61	-0.278247	0.0408099	0.473255	1
NPK76-II-72-1	CTNNB1_S37	-0.783	0.0408952	0.473255	0
Bryostatin 1	FBXW7_R479	1.001	0.0408932	0.473255	0
AT-7519	CTNNB1_S37	-0.820764	0.0424228	0.473662	0
Tubastatin A	XPO1_E571	-0.646138	0.0421182	0.473662	0
QS11	TP53_R282	0.68351	0.0410724	0.473662	0
THZ-2-49	SMAD2_R321	0.920481	0.0421667	0.473662	0
Cisplatin	TP53_R282	0.673921	0.0419766	0.473662	0
Y-39983	TP53_H179	0.564015	0.0419266	0.473662	0
BIX02189	PIK3CA_E545	0.364395	0.04143	0.473662	1
Methotrexate	CTNNB1_S33	0.858488	0.0423964	0.473662	0
Bryostatin 1	NRAS_Q61	-0.335951	0.0410729	0.473662	1
QL-XII-47	TP53_M237	0.838141	0.0424072	0.473662	0
CAL-101	PIK3CA_E545	0.388322	0.0412988	0.473662	1
AKT inhibitor VIII	TP53_R267	-0.882582	0.0413609	0.473662	0
TAK-715	XPO1_E571	-0.691826	0.0420256	0.473662	0
NSC-207895	TP53_G262	-0.899311	0.0423205	0.473662	0
AG-014699	TP53_R273	-1.02707	0.0423141	0.473662	0
Tamoxifen	TP53_R282	0.690983	0.04156	0.473662	0
AZD-0530	TP53_H179	-0.940494	0.0414979	0.473662	0
AT-7519	TP53_R273	-1.14254	0.0412053	0.473662	0
CCT018159	RAC1_P29	-1.09734	0.0424345	0.473662	0
OSI-930	TP53_G245	0.40804	0.042193	0.473662	0
Temozolomide	TP53_G244	-1.20024	0.0414523	0.473662	0
CH5424802	TP53_R110	0.688991	0.0414943	0.473662	0
Bicalutamide	SMAD4_R361	1.11398	0.0416185	0.473662	0
Olaparib	FBXW7_R479	0.930138	0.0412002	0.473662	0
Camptothecin	TP53_R273	-0.728533	0.041283	0.473662	0
Methotrexate	TP53_R248	-1.04595	0.0416529	0.473662	0
Mitomycin C	FBXW7_R479	0.974542	0.0420269	0.473662	0
MK-2206	PIK3CA_C420	-1.12444	0.0420151	0.473662	1
KU-55933	TP53_C242	0.840473	0.0414562	0.473662	0
ABT-869	STK11_S216	0.909421	0.0422965	0.473662	0
CHIR-99021	FBXW7_R479	0.967591	0.0423873	0.473662	0
Vinblastine	BRAF_V600	-0.826417	0.0422501	0.473662	1
KIN001-244	FBXW7_R479	0.778345	0.0422518	0.473662	0
Doxorubicin	BRAF_V600	-0.910758	0.0426988	0.474573	1
Zibotentan, ZD4054	TP53_R110	0.714047	0.0426619	0.474573	0
TG101348	PIK3CA_E545	0.37374	0.0426916	0.474573	1
Cytarabine	TP53_G244	0.83546	0.0425979	0.474573	0
JW-7-24-1	XPO1_E571	-0.690185	0.0431351	0.477878	0
AZD6244	TP53_S241	0.587209	0.043364	0.477878	0
BMN-673	TP53_R273	-0.733907	0.0433094	0.477878	0
NPK76-II-72-1	TP53_R273	0.655553	0.043282	0.477878	0
Midostaurin	TP53_G245	0.520669	0.043326	0.477878	0
Nutlin-3a	TP53_R282	0.678028	0.0432668	0.477878	0
Camptothecin	FBXW7_R479	0.900518	0.0431762	0.477878	0
KIN001-055	NRAS_Q61	0.309765	0.0432018	0.477878	1
AS605240	TP53_R248	-0.977131	0.0436005	0.479975	0
OSI-930	TP53_G262	-0.82557	0.0438003	0.48014	0
SNX-2112	BRAF_V600	-0.770512	0.0437147	0.48014	1
GSK269962A	BRAF_V600	0.259574	0.0436948	0.48014	1
Zibotentan, ZD4054	XPO1_E571	-0.711058	0.0437766	0.48014	0
Gemcitabine	PIK3CA_E545	-1.07489	0.044072	0.481211	1
PD-0332991	TP53_H179	0.599264	0.0440401	0.481211	0
Gemcitabine	TP53_R249	-0.966815	0.0440832	0.481211	0
PD-0325901	TP53_C242	0.744115	0.043989	0.481211	0
SB52334	TP53_M237	0.812933	0.0442917	0.48298	0
TL-2-105	TP53_R248	1.08154	0.0448719	0.482982	0
Afatinib	PIK3CA_E545	-0.418295	0.044834	0.482982	1
SB 216763	TP53_C242	-0.951848	0.0448883	0.482982	0
FR-180204	SMAD2_R321	1.00719	0.0446332	0.482982	0
PHA-793887	TP53_R248	-0.840315	0.0445105	0.482982	0
KIN001-135	TP53_H179	0.945085	0.0443943	0.482982	0
JQ12	RAC1_P29	-1.12088	0.0448628	0.482982	0
NVP-BEZ235	TP53_C242	0.843735	0.0448961	0.482982	0
Tubastatin A	PPP2R1A_R183	-0.897601	0.0448892	0.482982	0
Methotrexate	NRAS_Q61	0.912518	0.044786	0.482982	1
T0901317	STK11_S216	0.814497	0.0448026	0.482982	0
Masitinib	TP53_M237	0.726866	0.0446202	0.482982	0
QL-XI-92	TP53_R273	0.690722	0.0444389	0.482982	0
SN-38	TP53_P152	1.05152	0.0453784	0.484915	0
PXD101, Belinostat	SMAD2_R321	1.03067	0.0455466	0.484915	0
PLX4720	TP53_G262	1.00647	0.0452281	0.484915	0
AZD6482	TP53_D259	1.08481	0.0455151	0.484915	0
Olaparib (rescreen)	TP53_H179	0.658955	0.0454974	0.484915	0
AR-42	NRAS_Q61	-0.287278	0.0454686	0.484915	1
FK866	TP53_H179	0.609448	0.0455882	0.484915	0
KIN001-266	SMAD4_R361	0.917167	0.0452633	0.484915	0
HG-5-88-01	TP53_R273	0.369682	0.045528	0.484915	0
S-Trityl-L-cysteine	FBXW7_R479	1.08837	0.0455265	0.484915	0
WZ3105	TP53_M237	0.721938	0.0455891	0.484915	0
XMD13-2	TP53_R110	0.664158	0.0457128	0.485733	0
JNJ-26854165	NFE2L2_D77	-0.926503	0.0458826	0.48704	0
Bryostatin 1	XPO1_E571	-0.874986	0.0459411	0.487164	0
AMG-706	TP53_H179	0.647007	0.0461107	0.488463	0
BAY 61-3606	TP53_R110	0.755378	0.0462375	0.489307	0
NU-7441	TP53_R248	-0.27869	0.0463267	0.489312	0
CP466722	TP53_R110	0.698077	0.0463321	0.489312	0
Bosutinib	PIK3CA_E542	0.590233	0.0464861	0.490103	1
QL-VIII-58	BRAF_V600	-1.08467	0.0465429	0.490103	1
NPK76-II-72-1	TP53_M237	0.683997	0.0465484	0.490103	0
Embelin	TP53_R267	-0.844808	0.0466569	0.490747	0
CH5424802	TP53_R248	0.842075	0.0467655	0.491392	0
A-770041	TP53_R248	-1.15135	0.0468445	0.491631	0
BMS-708163	PIK3CA_E542	-1.18262	0.0468828	0.491631	1
Methotrexate	TP53_R248	-0.211892	0.0470666	0.492496	0
JQ1	BRAF_V600	0.234058	0.0471074	0.492496	1
CX-5461	PIK3CA_E545	0.383873	0.0470163	0.492496	1
PI-103	SMAD4_R361	1.15679	0.0472276	0.493255	0
AZD-0530	BRAF_V600	0.421723	0.0472811	0.493319	1
RO-3306	TP53_R110	-0.968133	0.0473892	0.493722	0
XL-184	TP53_R249	-0.902526	0.0474148	0.493722	0
Gefitinib	PIK3CA_E545	-0.417402	0.0475286	0.494412	1
JQ1	TP53_G245	0.512602	0.0477447	0.495987	0
CI-1040	FBXW7_R479	-0.976184	0.0478344	0.495987	0
SB590885	NRAS_Q61	-0.296983	0.0478709	0.495987	1
UNC0638	TP53_H179	0.523542	0.0478068	0.495987	0
WZ3105	BRAF_V600	-0.819988	0.0479805	0.496132	1
SGC0946	TP53_R282	0.748436	0.0479759	0.496132	0
piperlongumine	TP53_R248	0.259516	0.0480852	0.496721	0
STF-62247	PPP2R1A_R183	-0.948128	0.0485294	0.497422	0
UNC0638	BRAF_V600	-0.212317	0.0484192	0.497422	1
BMS-708163	TP53_R273	-1.1488	0.0482275	0.497422	0
AR-42	SMAD2_R321	1.19445	0.0486232	0.497422	0
Vinorelbine	TP53_G245	0.51314	0.0484339	0.497422	0
Camptothecin	TP53_H179	0.623215	0.0484165	0.497422	0
AC220	TP53_P152	-0.963498	0.0483041	0.497422	0
Midostaurin	NFE2L2_D77	-0.945834	0.0485953	0.497422	0
TW 37	TP53_R248	0.258962	0.0486317	0.497422	0
GSK690693	SMAD4_R361	1.0735	0.0485988	0.497422	0
Bicalutamide	NRAS_Q61	-0.294969	0.048836	0.497553	1
SB52334	SMAD2_R321	1.02691	0.0487987	0.497553	0
Midostaurin	SMAD4_R361	1.08986	0.0488123	0.497553	0
rTRAIL	HRAS_Q61	-1.10332	0.0488183	0.497553	0
XMD13-2	TP53_R273	-1.14105	0.0494287	0.501473	0
Shikonin	BRAF_V600	-0.257056	0.0493359	0.501473	1
NPK76-II-72-1	NFE2L2_D77	0.754447	0.0494933	0.501473	0
CAY10603	TP53_H179	0.562009	0.0492928	0.501473	0
NVP-BHG712	NRAS_Q61	-0.982791	0.0496069	0.501473	1
EKB-569	PIK3CA_C420	-1.01923	0.0494053	0.501473	1
PIK-93	SMAD4_R361	0.771479	0.0495954	0.501473	0
PIK-93	BRAF_V600	-0.729842	0.049529	0.501473	1
XMD15-27	TP53_R110	0.682011	0.0498152	0.50309	0
piperlongumine	PIK3CA_C420	1.06939	0.050055	0.503097	1
AZD6244	SMAD2_R321	-0.927455	0.0500579	0.503097	0
VX-702	TP53_H179	0.576554	0.0498888	0.503097	0
BMS-754807	TP53_R248	-1.18511	0.0500567	0.503097	0
AS605240	SMAD4_R361	-1.19453	0.0499426	0.503097	0
OSI-930	TP53_R282	0.570213	0.0502593	0.504633	0
CH5424802	TP53_R280	-0.932392	0.0503207	0.504718	0
BX-795	TP53_R248	-0.270487	0.0505592	0.504718	0
BMS-509744	TP53_S241	-0.844174	0.0505537	0.504718	0
JW-7-24-1	CTNNB1_S33	0.942121	0.0505484	0.504718	0
KIN001-260	TP53_R249	-0.746068	0.0504945	0.504718	0
GSK-650394	NFE2L2_D77	-0.947872	0.0505264	0.504718	0
OSI-906	FBXW7_R479	0.90837	0.0509816	0.505455	0
Ruxolitinib	STK11_S216	0.820441	0.0510485	0.505455	0
AZD6482	TP53_R273	-0.702467	0.0511194	0.505455	0
AS605240	TP53_G245	0.428716	0.0511116	0.505455	0
ATRA	TP53_H179	0.578136	0.0508791	0.505455	0
SB590885	TP53_R267	-0.851363	0.0507963	0.505455	0
KIN001-260	XPO1_E571	-0.608895	0.0509164	0.505455	0
DMOG	NRAS_Q61	-0.989288	0.0508632	0.505455	1
Olaparib (rescreen)	STK11_S216	0.907178	0.0506867	0.505455	0
PIK-93	SMAD4_R361	1.03013	0.0510173	0.505455	0
BAY 61-3606	TP53_R273	-1.1252	0.0512636	0.505808	0
VX-702	TP53_R110	-0.69868	0.0513012	0.505808	0
piperlongumine	TP53_R248	-1.05974	0.0512525	0.505808	0
I-BET	PIK3CA_E542	-1.16873	0.0515821	0.507143	1
Gefitinib	PIK3CA_C420	-1.01899	0.051583	0.507143	1
LY317615	TP53_R248	-0.769637	0.0514913	0.507143	0
KIN001-102	TP53_P152	-0.879584	0.0516901	0.507716	0
KIN001-135	BRAF_V600	-1.25138	0.0517985	0.5083	1
VX-11e	TP53_M237	0.768489	0.0518747	0.508529	0
LY317615	TP53_R273	0.637703	0.0519197	0.508529	0
AT-7519	XPO1_E571	-0.643866	0.052156	0.508925	0
SB590885	PIK3CA_E545	-1.02694	0.0520558	0.508925	1
GSK690693	SMAD2_R321	-1.0609	0.0521305	0.508925	0
PXD101, Belinostat	TP53_G244	-1.13847	0.05214	0.508925	0
KIN001-055	SMAD2_R321	1.0417	0.0522789	0.509646	0
AC220	STK11_S216	0.821821	0.0524242	0.510583	0
NVP-TAE684	FBXW7_R479	1.05248	0.0526201	0.511587	0
BX-912	PIK3CA_E545	0.351796	0.0526257	0.511587	1
17-AAG	TP53_R110	-0.826593	0.0527378	0.512197	0
TPCA-1	TP53_R280	0.905751	0.0528194	0.512511	0
JQ1	STK11_S216	0.930992	0.0529481	0.512984	0
JQ1	TP53_R248	0.794834	0.0532654	0.512984	0
BAY 61-3606	TP53_R280	1.03584	0.0531089	0.512984	0
OSI-930	TP53_R248	0.904122	0.0532073	0.512984	0
UNC0638	PIK3CA_E545	0.334997	0.0532884	0.512984	1
GW-2580	STK11_S216	0.879766	0.0533388	0.512984	0
CAY10603	NRAS_Q61	-0.273382	0.053319	0.512984	1
BAY 61-3606	NRAS_Q61	-0.293404	0.0533093	0.512984	1
KIN001-270	CTNNB1_S37	-0.79649	0.0534111	0.512984	0
KIN001-102	TP53_H179	0.507653	0.0533991	0.512984	0
AZD6244	BRAF_V600	-0.7873	0.0533018	0.512984	1
BMS-708163	STK11_S216	0.834825	0.0540374	0.515163	0
PLX4720 (rescreen)	TP53_R282	0.676139	0.0539399	0.515163	0
Camptothecin	TP53_R267	0.857177	0.0540399	0.515163	0
GSK429286A	TP53_H179	0.537942	0.0539562	0.515163	0
AZD7762	CTNNB1_S33	0.982299	0.0537554	0.515163	0
AUY922	FBXW7_R479	0.925861	0.0541281	0.515163	0
Pazopanib	PIK3CA_E542	0.61214	0.0539933	0.515163	1
NU-7441	XPO1_E571	-0.806064	0.0541338	0.515163	0
KIN001-236	TP53_R249	-0.765462	0.0539769	0.515163	0
PF-4708671	TP53_R248	0.919237	0.0540902	0.515163	0
CGP-082996	TP53_H179	0.866748	0.0542951	0.515754	0
CH5424802	TP53_P152	-0.917524	0.0542728	0.515754	0
Tubastatin A	SMAD4_R361	1.0702	0.0545304	0.517516	0
PFI-1	HRAS_Q61	-1.01861	0.0546022	0.517725	0
CHIR-99021	FBXW7_R479	0.800219	0.0546936	0.518119	0
LFM-A13	TP53_G245	0.488629	0.0547854	0.518515	0
Vinorelbine	TP53_R273	-1.09843	0.0550326	0.519974	0
Bicalutamide	TP53_G244	-1.12564	0.0550396	0.519974	0
Pazopanib	TP53_R248	0.269939	0.0552354	0.521143	0
CH5424802	TP53_R282	0.561948	0.0552837	0.521143	0
SNX-2112	TP53_R273	-1.05312	0.0553138	0.521143	0
AZD6482	NRAS_Q61	0.294347	0.0554283	0.521749	1
Temsirolimus	TP53_S241	0.713823	0.0556087	0.522029	0
CCT007093	TP53_R267	-0.819112	0.0555436	0.522029	0
BX-912	SMAD2_R321	0.888462	0.0555984	0.522029	0
VX-680	XPO1_E571	-1.04949	0.0557354	0.522495	0
GSK269962A	TP53_R248	1.18141	0.055759	0.522495	0
QS11	TP53_G244	-0.80637	0.0558295	0.522685	0
CCT018159	TP53_C242	-0.732366	0.0559168	0.522923	0
KIN001-102	FBXW7_R479	0.672257	0.056006	0.522923	0
FK866	TP53_S241	0.92589	0.055992	0.522923	0
AZD6482	TP53_R110	0.733029	0.0561285	0.523552	0
AV-951	PIK3CA_E542	0.5053	0.056174	0.523552	1
JW-7-24-1	TP53_G262	-0.793962	0.0564913	0.525426	0
BX-795	PIK3CA_E545	0.407786	0.0565267	0.525426	1
CP724714	BRAF_V600	0.250191	0.0564701	0.525426	1
WZ3105	PIK3CA_E545	0.355669	0.0567218	0.526767	1
RO-3306	TP53_H179	0.621526	0.0568083	0.5271	0
LY317615	PIK3CA_E545	0.384376	0.0569598	0.527933	1
LY317615	SMAD4_R361	-0.851224	0.0569997	0.527933	0
TG101348	TP53_R273	0.621283	0.0574085	0.531246	0
SN-38	PIK3CA_C420	0.999647	0.0574678	0.531321	1
KIN001-102	TP53_R282	0.529088	0.0576046	0.531693	0
OSU-03012	TP53_R248	-0.264183	0.0576423	0.531693	0
I-BET	TP53_G244	-1.09686	0.0576615	0.531693	0
Mitomycin C	TP53_S241	-0.87275	0.0582119	0.533385	0
KIN001-102	CTNNB1_S37	-0.741976	0.058621	0.533385	0
Dabrafenib	TP53_R273	0.231998	0.0579741	0.533385	0
BMS-536924	SMAD4_R361	1.02344	0.0586043	0.533385	0
JQ1	TP53_R273	0.656774	0.0586847	0.533385	0
CP724714	STK11_S216	0.908676	0.0583329	0.533385	0
AKT inhibitor VIII	BRAF_V600	0.254919	0.0583918	0.533385	1
TL-1-85	BRAF_V600	-0.725506	0.0581762	0.533385	1
QL-XI-92	NRAS_Q61	-0.254132	0.0586903	0.533385	1
XMD13-2	TP53_G244	-1.07467	0.0588146	0.533385	0
Afatinib (rescreen)	BRAF_V600	0.772897	0.0585748	0.533385	1
PF-562271	BRAF_V600	-0.253856	0.058085	0.533385	1
VX-11e	PIK3CA_E545	0.376894	0.0585363	0.533385	1
QL-XI-92	TP53_G245	0.375337	0.0582978	0.533385	0
SB-715992	TP53_G245	0.418952	0.0584397	0.533385	0
JNK-9L	BRAF_V600	-0.8109	0.0588202	0.533385	1
XMD14-99	TP53_R273	-1.09132	0.0588052	0.533385	0
GSK269962A	HRAS_Q61	-1.03505	0.0587815	0.533385	0
Ruxolitinib	TP53_R273	0.654553	0.0581317	0.533385	0
BI-2536	FBXW7_R479	1.05605	0.0588938	0.533587	0
PF-562271	XPO1_E571	-0.814242	0.0589833	0.533757	0
CGP-082996	TP53_S241	-0.756563	0.059099	0.533757	0
CP724714	TP53_G244	-0.739441	0.059118	0.533757	0
GSK-650394	XPO1_E571	-0.81965	0.0590361	0.533757	0
Embelin	SMAD4_R361	1.03228	0.0594081	0.534848	0
AUY922	CTNNB1_S37	-0.90509	0.05932	0.534848	0
UNC0638	TP53_M237	0.667197	0.0594448	0.534848	0
CH5424802	BRAF_V600	0.214573	0.0593427	0.534848	1
JNJ-26854165	SMAD2_R321	1.00997	0.0596289	0.536041	0
HG-5-88-01	PIK3CA_C420	0.97881	0.0602989	0.538833	1
MP470	TP53_M237	0.786386	0.0602822	0.538833	0
OSI-027	PIK3CA_E542	-1.14086	0.0602109	0.538833	1
BMS-345541	TP53_R273	-1.01039	0.0601561	0.538833	0
Tipifarnib	TP53_R282	0.650127	0.0603024	0.538833	0
VX-702	FBXW7_R479	0.82726	0.0600073	0.538833	0
GSK269962A	BRAF_V600	-1.15068	0.0601621	0.538833	1
Vinorelbine	TP53_R248	1.10039	0.0604331	0.539073	0
XL-880	SMAD2_R321	0.968357	0.0603981	0.539073	0
UNC1215	TP53_R248	0.771151	0.0609804	0.539473	0
FK866	TP53_D259	0.929823	0.0610028	0.539473	0
QL-X-138	XPO1_E571	-0.661447	0.06055	0.539473	0
Midostaurin	TP53_R249	-0.89778	0.0610489	0.539473	0
XAV 939	TP53_R282	0.725279	0.0607265	0.539473	0
QS11	CTNNB1_S33	1.02038	0.0608913	0.539473	0
GSK429286A	PIK3CA_C420	0.902574	0.0609881	0.539473	1
17-AAG	TP53_R249	0.605351	0.0609661	0.539473	0
PF-562271	PPP2R1A_R183	-1.03991	0.0609395	0.539473	0
KIN001-055	TP53_R282	0.618114	0.060625	0.539473	0
BIRB 0796	FBXW7_R479	0.920843	0.0608679	0.539473	0
STF-62247	TP53_H179	0.522398	0.061227	0.539932	0
rTRAIL	CDK4_R24	-1.04819	0.0612567	0.539932	0
Obatoclax Mesylate	BRAF_V600	-0.849074	0.0612197	0.539932	1
SB-505124	U2AF1_S34	0.872738	0.0613566	0.540354	0
XL-880	NFE2L2_D77	-0.834298	0.0614273	0.540519	0
GSK690693	NRAS_Q61	0.25426	0.0616175	0.541734	1
Dasatinib	TP53_R248	-1.1016	0.0617749	0.54223	0
THZ-2-102-1	STK11_S216	0.798556	0.0618088	0.54223	0
MP470	BRAF_V600	0.238445	0.0618305	0.54223	1
GSK1070916	PIK3CA_E545	0.329876	0.0620887	0.544036	1
MLN4924	FBXW7_R479	0.886539	0.062203	0.544577	0
CAL-101	NRAS_Q61	-0.946545	0.0623295	0.545226	1
AKT inhibitor VIII	STK11_S216	0.899437	0.0626265	0.546989	0
SNX-2112	TP53_R110	0.645919	0.0626784	0.546989	0
IOX2	RAC1_P29	-1.04418	0.0627416	0.546989	0
PD-0332991	FBXW7_R479	0.830279	0.0627122	0.546989	0
MG-132	NRAS_Q61	-0.407331	0.0630822	0.547204	1
THZ-2-49	BRAF_V600	-0.199984	0.063032	0.547204	1
CAL-101	BRAF_V600	0.213884	0.0630591	0.547204	1
AR-42	TP53_M237	0.721661	0.0630777	0.547204	0
Cetuximab	NRAS_Q61	0.306641	0.0630642	0.547204	1
IPA-3	TP53_R248	-0.251394	0.0630184	0.547204	0
Doxorubicin	U2AF1_S34	-0.913194	0.0631643	0.547459	0
MK-2206	TP53_H179	0.595645	0.0632784	0.547598	0
PHA-793887	PPP2R1A_R183	-0.839337	0.0632857	0.547598	0
OSU-03012	TP53_G245	0.468735	0.0633854	0.548004	0
Bryostatin 1	SMAD4_R361	1.04839	0.0636295	0.549201	0
QS11	BRAF_V600	-0.821291	0.0635988	0.549201	1
QS11	SMAD4_R361	1.0085	0.0639541	0.551087	0
KU-55933	TP53_R248	-0.255622	0.0639333	0.551087	0
KIN001-270	STK11_S216	0.764456	0.0642548	0.551631	0
SB590885	FBXW7_R479	0.80593	0.0642827	0.551631	0
5-Fluorouracil	TP53_M237	0.694666	0.0641873	0.551631	0
Trametinib	XPO1_E571	0.653009	0.0641481	0.551631	0
VX-702	STK11_S216	0.939282	0.0641612	0.551631	0
Sunitinib	FBXW7_R479	0.953573	0.0644379	0.551738	0
OSI-906	TP53_R282	0.6507	0.0646587	0.551738	0
AKT inhibitor VIII	TP53_R110	0.730023	0.0646092	0.551738	0
SNX-2112	CTNNB1_S37	-0.782237	0.0647198	0.551738	0
ZSTK474	TP53_R248	-0.878127	0.0645738	0.551738	0
GDC0941	TP53_R273	-0.72843	0.0646997	0.551738	0
Dabrafenib	TP53_M237	0.662721	0.0647094	0.551738	0
Obatoclax Mesylate	FBXW7_R479	0.870522	0.0646889	0.551738	0
SB590885	TP53_R248	-0.846914	0.064952	0.552027	0
T0901317	FBXW7_R479	0.748782	0.0650412	0.552027	0
Nilotinib	TP53_R248	-1.11978	0.0651956	0.552027	0
XAV 939	TP53_R248	0.764664	0.0648337	0.552027	0
QL-XII-47	SMAD2_R321	0.982157	0.0651434	0.552027	0
AR-42	SMAD2_R321	0.921896	0.0652319	0.552027	0
BMS-754807	TP53_S241	-0.841092	0.0649199	0.552027	0
QL-X-138	CTNNB1_S37	-0.916442	0.0649808	0.552027	0
ZSTK474	PIK3CA_E542	-1.1124	0.0652046	0.552027	1
Lenalidomide	FBXW7_R479	0.806262	0.0662534	0.553383	0
Tubastatin A	TP53_M237	0.639454	0.0661383	0.553383	0
Bexarotene	CTNNB1_S37	-0.869745	0.066352	0.553383	0
NSC-207895	RAC1_P29	-0.939331	0.066105	0.553383	0
CEP-701	TP53_G245	0.43323	0.0659106	0.553383	0
Salubrinal	XPO1_E571	-0.848378	0.0656192	0.553383	0
TG101348	XPO1_E571	-0.598952	0.0660984	0.553383	0
BMS-754807	TP53_R267	-0.770586	0.0656338	0.553383	0
PI-103	PIK3CA_E542	0.528763	0.0657981	0.553383	1
Temozolomide	TP53_R280	-0.925178	0.0660354	0.553383	0
YK 4-279	TP53_G244	1.0865	0.0661653	0.553383	0
KIN001-266	TP53_R273	0.623334	0.0663138	0.553383	0
A-443654	TP53_S241	-0.79218	0.0664039	0.553383	0
Tubastatin A	TP53_G244	-1.03968	0.0659723	0.553383	0
BIRB 0796	TP53_G262	1.04195	0.0658204	0.553383	0
GSK-650394	CTNNB1_S37	-0.89224	0.0655197	0.553383	0
Camptothecin	PIK3CA_E545	-0.926366	0.0664035	0.553383	1
IPA-3	TP53_H179	0.560694	0.0661581	0.553383	0
Tipifarnib	CTNNB1_S33	1.0347	0.0660368	0.553383	0
ATRA	TP53_S241	0.943477	0.0665541	0.554191	0
Nutlin-3a	FBXW7_R479	0.81297	0.0666261	0.554346	0
BX-795	U2AF1_S34	-0.975653	0.0667433	0.554878	0
UNC0638	TP53_R273	-0.995634	0.0668097	0.554985	0
WZ3105	TP53_R273	0.59876	0.06702	0.555843	0
CCT007093	TP53_R248	0.830272	0.0669694	0.555843	0
AZD6244	TP53_R248	0.209843	0.0670923	0.556	0
Gemcitabine	TP53_G245	0.472052	0.0674504	0.557216	0
PF-562271	TP53_R280	-1.01455	0.0674241	0.557216	0
TL-2-105	TP53_H179	0.486745	0.0673956	0.557216	0
FH535	CTNNB1_S37	-0.865725	0.0674535	0.557216	0
Elesclomol	TP53_R267	0.851042	0.0675279	0.557387	0
VX-680	BRAF_V600	-1.23801	0.0676978	0.558181	1
CX-5461	TP53_G244	-1.06152	0.0677315	0.558181	0
BX-795	XPO1_E571	-0.755249	0.0677912	0.55823	0
BMS-754807	PIK3CA_E545	0.386039	0.0679092	0.558759	1
LAQ824	FBXW7_R479	0.848001	0.0684582	0.56242	0
EHT 1864	TP53_R267	-0.779937	0.0684624	0.56242	0
YM155	TP53_R273	-1.09181	0.0685474	0.562673	0
WZ3105	TP53_R273	-1.09753	0.0687055	0.563252	0
AZD6482	BRAF_V600	-0.241767	0.0687263	0.563252	1
RDEA119	TP53_G244	1.01824	0.0688675	0.563654	0
QL-XI-92	PIK3CA_E542	0.469218	0.0688839	0.563654	1
EHT 1864	HRAS_Q61	1.00208	0.0690977	0.564959	0
Pazopanib	PPP2R1A_R183	0.996354	0.0692814	0.566016	0
PF-4708671	U2AF1_S34	1.01619	0.0693999	0.566094	0
BMS-708163	TP53_G245	0.384303	0.0693482	0.566094	0
UNC0638	TP53_G245	-0.358445	0.0698206	0.567545	0
AZD8055	TP53_R248	1.13058	0.0697315	0.567545	0
Temozolomide	TP53_H179	0.561654	0.0698508	0.567545	0
XMD13-2	XPO1_E571	-0.603461	0.0697555	0.567545	0
BMS-754807	U2AF1_S34	-0.849146	0.0696417	0.567545	0
XL-880	BRAF_V600	-0.707234	0.0713098	0.567565	1
Nutlin-3a	TP53_R249	0.606308	0.0705766	0.567565	0
JQ1	CTNNB1_S37	-0.869662	0.07067	0.567565	0
PI-103	SMAD2_R321	1.06892	0.0711416	0.567565	0
AC220	NRAS_Q61	0.902634	0.0710086	0.567565	1
Paclitaxel	BRAF_V600	-1.21771	0.071279	0.567565	1
CEP-701	NRAS_Q61	-0.271187	0.0709962	0.567565	1
UNC0638	SMAD2_R321	0.819675	0.0710019	0.567565	0
Ruxolitinib	PIK3CA_E542	0.482296	0.0708915	0.567565	1
Etoposide	XPO1_E571	-0.780542	0.070482	0.567565	0
PFI-1	BRAF_V600	-0.225027	0.0701503	0.567565	1
SB590885	TP53_R282	0.597216	0.0702152	0.567565	0
NG-25	PIK3CA_E542	0.44421	0.0713279	0.567565	1
Docetaxel	TP53_R248	0.725237	0.0712656	0.567565	0
SNX-2112	TP53_G245	0.374036	0.0711483	0.567565	0
EKB-569	PPP2R1A_R183	-0.939104	0.0702495	0.567565	0
PD-0332991	STK11_S216	0.929283	0.0706258	0.567565	0
GNF-2	FBXW7_R479	0.883518	0.0701832	0.567565	0
DMOG	U2AF1_S34	-0.814077	0.0706722	0.567565	0
GSK269962A	NRAS_Q61	0.403674	0.0710455	0.567565	1
XMD15-27	XPO1_E571	-0.630213	0.0702216	0.567565	0
NU-7441	TP53_R282	0.639837	0.0705997	0.567565	0
MLN4924	PIK3CA_C420	0.991146	0.0707883	0.567565	1
VX-680	FBXW7_R479	0.989413	0.0702586	0.567565	0
JW-7-52-1	BRAF_V600	-0.411371	0.0709429	0.567565	1
GSK1070916	FBXW7_R479	0.634428	0.0702817	0.567565	0
TG101348	PIK3CA_E542	0.457017	0.070836	0.567565	1
Lenalidomide	TP53_S241	0.646496	0.0714941	0.568452	0
AZD6244	TP53_R248	0.255024	0.071848	0.569154	0
Trametinib	TP53_G244	1.02133	0.0718462	0.569154	0
MK-2206	TP53_C242	0.772917	0.0718609	0.569154	0
CP724714	NRAS_Q61	0.922508	0.0718318	0.569154	1
AP-24534	U2AF1_S34	-0.776484	0.0721138	0.569154	0
DMOG	TP53_S241	-0.540805	0.0721083	0.569154	0
XL-184	PIK3CA_E545	0.369455	0.07216	0.569154	1
CI-1040	TP53_R248	1.05732	0.0721848	0.569154	0
AG-014699	TP53_G245	0.424277	0.071933	0.569154	0
GSK-650394	FBXW7_R479	0.870962	0.0720469	0.569154	0
Temsirolimus	TP53_G244	0.735182	0.0718268	0.569154	0
TL-1-85	TP53_G245	0.326402	0.0723349	0.569905	0
Gefitinib	CTNNB1_S37	-0.93992	0.0724875	0.570242	0
Crizotinib	BRAF_V600	0.363188	0.0724768	0.570242	1
Nilotinib	PIK3CA_E542	0.434728	0.0737699	0.570399	1
NVP-BHG712	XPO1_E571	-0.574958	0.0733596	0.570399	0
MPS-1-IN-1	SMAD2_R321	0.85339	0.0726428	0.570399	0
PLX4720	STK11_S216	0.900465	0.0728986	0.570399	0
MPS-1-IN-1	TP53_M237	0.661069	0.0735749	0.570399	0
NPK76-II-72-1	TP53_R248	-0.19284	0.0728889	0.570399	0
Vismodegib	TP53_R248	-0.236687	0.0731922	0.570399	0
BMS-536924	TP53_R249	0.635895	0.0736085	0.570399	0
ABT-888	TP53_R248	-0.240425	0.0736734	0.570399	0
GSK269962A	PIK3CA_E545	0.769773	0.073393	0.570399	1
Embelin	TP53_R282	0.60278	0.072801	0.570399	0
Bexarotene	TP53_R273	0.601256	0.0729796	0.570399	0
SB590885	PPP2R1A_R183	-0.898886	0.0732726	0.570399	0
QL-XII-47	TP53_R273	-1.02073	0.0726774	0.570399	0
AV-951	TP53_R110	0.609102	0.0736433	0.570399	0
RDEA119 (rescreen)	TP53_G244	1.02222	0.0736103	0.570399	0
BX-912	TP53_R282	0.50955	0.0737208	0.570399	0
CHIR-99021	TP53_R248	0.932314	0.0728955	0.570399	0
PHA-793887	U2AF1_S34	-0.700867	0.0737503	0.570399	0
IPA-3	NFE2L2_D77	0.816535	0.0732494	0.570399	0
IPA-3	TP53_S241	0.546812	0.0733172	0.570399	0
AZD7762	U2AF1_S34	-0.912252	0.0731083	0.570399	0
CAY10603	BRAF_V600	-0.730245	0.0737619	0.570399	1
SB-505124	TP53_G262	-0.959984	0.0739734	0.570598	0
AMG-706	U2AF1_S34	-0.999984	0.0740429	0.570598	0
XMD8-92	PIK3CA_E542	0.597443	0.0740824	0.570598	1
BIRB 0796	BRAF_V600	-0.699264	0.0740106	0.570598	1
BMS-509744	TP53_H179	-0.86164	0.07418	0.570598	0
SL 0101-1	TP53_R248	1.01199	0.0741276	0.570598	0
Vismodegib	TP53_G244	-1.03926	0.0741072	0.570598	0
Methotrexate	TP53_G244	-0.583593	0.0745037	0.571096	0
Masitinib	TP53_R267	-0.644049	0.0747001	0.571096	0
VX-702	HRAS_Q61	0.899969	0.0750502	0.571096	0
CEP-701	BRAF_V600	-0.720561	0.0744298	0.571096	1
Tamoxifen	TP53_R248	0.733698	0.0747613	0.571096	0
JQ1	BRAF_V600	-0.710114	0.0751367	0.571096	1
AUY922	PIK3CA_E542	0.572153	0.0751375	0.571096	1
Temsirolimus	TP53_R248	0.725975	0.0750406	0.571096	0
IPA-3	FBXW7_R479	0.813429	0.0747311	0.571096	0
AG-014699	CDK4_R24	-0.960665	0.0749588	0.571096	0
Shikonin	BRAF_V600	-0.805796	0.0747905	0.571096	1
Nilotinib	TP53_R282	0.458696	0.0752211	0.571096	0
(5Z)-7-Oxozeaenol	TP53_S241	0.540079	0.0752339	0.571096	0
XL-184	SMAD2_R321	0.937354	0.0745476	0.571096	0
JNJ-26854165	TP53_R248	0.770453	0.0746741	0.571096	0
FK866	BRAF_V600	0.21282	0.0748473	0.571096	1
FTI-277	PIK3CA_E545	-0.408125	0.0750686	0.571096	1
QL-X-138	PIK3CA_C420	0.886002	0.0747035	0.571096	1
BMS-536924	TP53_R248	-1.0569	0.0753261	0.571206	0
KIN001-244	TP53_H179	0.508784	0.0754601	0.571206	0
TL-1-85	TP53_M237	0.591498	0.0754683	0.571206	0
AZD6244	PIK3CA_C420	0.840112	0.075385	0.571206	1
GSK2126458	CTNNB1_S37	-0.785737	0.0756681	0.572302	0
ABT-888	RAC1_P29	-0.94472	0.0757991	0.572876	0
MPS-1-IN-1	SMAD4_R361	0.996483	0.0759544	0.573233	0
KIN001-055	TP53_R248	-0.738363	0.0759567	0.573233	0
EHT 1864	SMAD4_R361	-0.97893	0.076113	0.573996	0
OSI-906	XPO1_E571	-0.738699	0.0762215	0.574397	0
Pazopanib	CTNNB1_S37	-0.842577	0.0763323	0.574605	0
NPK76-II-72-1	CTNNB1_S33	0.785066	0.0764737	0.574605	0
Nutlin-3a	TP53_C242	0.703111	0.0764455	0.574605	0
Gemcitabine	NFE2L2_D77	-0.850861	0.0764798	0.574605	0
BIRB 0796	TP53_R267	-0.869404	0.0765255	0.574605	0
JNK-9L	TP53_R282	0.609604	0.0770563	0.575388	0
XMD14-99	TP53_R110	0.561265	0.0766932	0.575388	0
NSC-87877	TP53_S241	0.581447	0.0769613	0.575388	0
PLX4720 (rescreen)	PIK3CA_C420	0.876559	0.0769764	0.575388	1
SN-38	TP53_R273	-0.638081	0.076812	0.575388	0
Shikonin	NRAS_Q61	-0.27246	0.0769825	0.575388	1
IOX2	TP53_R282	-0.651009	0.0768602	0.575388	0
Ruxolitinib	SMAD4_R361	0.743707	0.0770727	0.575388	0
FMK	STK11_S216	0.870531	0.0771773	0.575755	0
WZ3105	PIK3CA_C420	0.821544	0.0772763	0.576042	1
BIX02189	TP53_R249	-0.699398	0.0773266	0.576042	0
QL-VIII-58	TP53_R110	0.937225	0.0774418	0.5764	0
WH-4-023	TP53_S241	-0.683646	0.0775412	0.5764	0
Midostaurin	CTNNB1_S37	-0.845721	0.0775333	0.5764	0
T0901317	XPO1_E571	-0.641322	0.0776492	0.576791	0
CGP-082996	XPO1_E571	-0.916951	0.0777542	0.577159	0
WZ3105	PIK3CA_E542	-1.02134	0.0779055	0.577869	1
KIN001-055	TP53_D259	0.945116	0.0780385	0.578332	0
PIK-93	TP53_H179	0.462975	0.0780792	0.578332	0
GSK690693	TP53_R248	-0.203157	0.078322	0.579717	0
CGP-082996	TP53_R248	-1.06411	0.0786192	0.58001	0
EKB-569	TP53_P152	-0.911743	0.0785086	0.58001	0
AR-42	PIK3CA_E542	0.484407	0.0785672	0.58001	1
BI-2536	TP53_R273	-0.422559	0.0785028	0.58001	0
TPCA-1	U2AF1_S34	-0.712279	0.0786407	0.58001	0
QL-XII-61	SMAD2_R321	-0.924879	0.0787498	0.580403	0
AC220	XPO1_E571	-0.609098	0.0788173	0.580488	0
GSK1070916	TP53_R248	-0.191308	0.0790055	0.581463	0
GSK269962A	TP53_R282	0.630636	0.0790723	0.581464	0
XAV 939	TP53_R110	-0.679811	0.0791177	0.581464	0
KIN001-244	TP53_G245	0.366902	0.0793525	0.582778	0
KIN001-102	TP53_G245	0.33682	0.0794485	0.582905	0
AT-7519	PIK3CA_E542	0.4513	0.079482	0.582905	1
Embelin	NRAS_Q61	-0.271966	0.0798358	0.583701	1
ABT-263	PPP2R1A_R183	-0.802535	0.0796673	0.583701	0
Obatoclax Mesylate	TP53_R110	0.674004	0.0798082	0.583701	0
KIN001-102	CTNNB1_S33	0.794752	0.079792	0.583701	0
Salubrinal	TP53_G245	0.541913	0.0798713	0.583701	0
XMD14-99	PIK3CA_E542	0.431086	0.0800866	0.583845	1
TW 37	TP53_R248	-0.934337	0.0800834	0.583845	0
OSU-03012	TP53_R249	-0.821766	0.0801158	0.583845	0
AT-7519	CTNNB1_S33	0.819316	0.080036	0.583845	0
AMG-706	TP53_R248	0.718422	0.0804056	0.585546	0
Bicalutamide	PIK3CA_E542	-0.585563	0.0804854	0.585717	1
MK-2206	TP53_R273	-0.736816	0.0807029	0.585771	0
Cisplatin	FBXW7_R479	0.818103	0.0807183	0.585771	0
TAK-715	PIK3CA_E542	0.460979	0.0806043	0.585771	1
Bleomycin	U2AF1_S34	-0.855252	0.0807068	0.585771	0
Afatinib (rescreen)	PIK3CA_C420	-0.905601	0.0809365	0.586945	1
PHA-793887	TP53_M237	0.612385	0.0810456	0.587326	0
XMD14-99	PIK3CA_C420	0.780473	0.0812325	0.587524	1
JNK Inhibitor VIII	CTNNB1_S37	-0.976535	0.081299	0.587524	0
CX-5461	PIK3CA_E542	0.474122	0.0812878	0.587524	1
AKT inhibitor VIII	TP53_R248	0.992714	0.0811394	0.587524	0
XMD15-27	TP53_M237	0.663933	0.081425	0.58762	0
I-BET	TP53_G244	-0.539465	0.081482	0.58762	0
SL 0101-1	TP53_R248	-1.09147	0.0814547	0.58762	0
AV-951	SMAD4_R361	0.725671	0.0816341	0.588309	0
CP466722	CTNNB1_S37	-0.744316	0.0821122	0.58909	0
Erlotinib	TP53_H179	-0.941231	0.0821256	0.58909	0
AZD-0530	TP53_G245	0.541513	0.0821127	0.58909	0
Bleomycin (50 uM)	TP53_R248	0.214526	0.0818284	0.58909	0
GDC0941 (rescreen)	TP53_R267	0.841849	0.081913	0.58909	0
Bosutinib	TP53_G245	0.400928	0.08201	0.58909	0
TG101348	TP53_R248	0.881577	0.0821959	0.58909	0
BMS-708163	SMAD4_R361	1.01595	0.0821684	0.58909	0
WZ-1-84	TP53_S241	-0.732846	0.0823105	0.589504	0
PIK-93	CTNNB1_S37	-0.681052	0.0824391	0.589613	0
Gemcitabine	TP53_R248	-0.24983	0.0823845	0.589613	0
AP-24534	TP53_R248	1.00676	0.0825831	0.590236	0
AICAR	TP53_R248	-0.774623	0.082842	0.590887	0
FR-180204	CTNNB1_S37	-0.75268	0.0831106	0.590887	0
XMD11-85h	TP53_R248	-0.298652	0.0832996	0.590887	0
XMD13-2	TP53_G244	-0.575795	0.0830129	0.590887	0
Bosutinib	TP53_R248	-0.786679	0.0831855	0.590887	0
JQ1	CTNNB1_S33	0.963563	0.0828957	0.590887	0
17-AAG	PIK3CA_E542	-0.469882	0.0827432	0.590887	1
Midostaurin	TP53_R282	0.588602	0.0830453	0.590887	0
STF-62247	TP53_R282	0.512299	0.0832732	0.590887	0
TGX221	PIK3CA_E545	0.701783	0.0830318	0.590887	1
PF-4708671	FBXW7_R479	0.752866	0.0832699	0.590887	0
FK866	PIK3CA_C420	0.859306	0.0834992	0.591495	1
Bryostatin 1	TP53_R273	0.590886	0.0834504	0.591495	0
BX-795	FBXW7_R479	0.797182	0.0844521	0.591791	0
Bleomycin (50 uM)	TP53_P152	0.88415	0.0839487	0.591791	0
SB-715992	TP53_P152	0.876305	0.0843785	0.591791	0
MK-2206	NRAS_Q61	0.281673	0.0840928	0.591791	1
OSI-930	SMAD2_R321	0.818441	0.0842497	0.591791	0
BIX02189	TP53_S241	0.456986	0.0843963	0.591791	0
JQ1	CTNNB1_S37	-0.843415	0.0844497	0.591791	0
PIK-93	PIK3CA_E542	-1.02783	0.0838391	0.591791	1
IPA-3	TP53_M237	0.704948	0.0842637	0.591791	0
GSK429286A	TP53_R282	0.510954	0.0838728	0.591791	0
Afatinib	TP53_R273	-0.625171	0.0844376	0.591791	0
Embelin	CTNNB1_S37	-0.819122	0.0841187	0.591791	0
Cetuximab	HRAS_Q61	0.96591	0.0837601	0.591791	0
GDC0941 (rescreen)	U2AF1_S34	-0.836653	0.0838804	0.591791	0
Axitinib	FBXW7_R479	0.766546	0.0839771	0.591791	0
Trametinib	HRAS_Q61	-0.787844	0.0836333	0.591791	0
JQ12	PPP2R1A_R183	-0.962283	0.084595	0.592393	0
THZ-2-49	TP53_R273	-1.051	0.0848918	0.593241	0
LAQ824	XPO1_E571	-0.718003	0.0850015	0.593241	0
BIRB 0796	TP53_S241	-0.690839	0.0848255	0.593241	0
CMK	FBXW7_R479	0.96942	0.0848895	0.593241	0
THZ-2-102-1	TP53_R273	0.582884	0.0849938	0.593241	0
KIN001-244	BRAF_V600	-0.200107	0.0850623	0.593267	1
Trametinib	PIK3CA_C420	0.782489	0.0851209	0.593278	1
Etoposide	STK11_S216	0.828399	0.0853244	0.594297	0
Dabrafenib	TP53_G245	0.399533	0.0855909	0.594346	0
GSK429286A	TP53_S241	0.7818	0.0854864	0.594346	0
Docetaxel	TP53_R110	-0.626323	0.0856746	0.594346	0
GSK690693	NRAS_Q61	0.845428	0.085594	0.594346	1
MLN4924	TP53_R248	0.891642	0.085619	0.594346	0
STF-62247	TP53_R273	0.592371	0.0854773	0.594346	0
Phenformin	STK11_S216	0.723344	0.0859434	0.595021	0
Bleomycin	TP53_R282	0.595949	0.0859436	0.595021	0
KIN001-260	TP53_G245	0.320156	0.085832	0.595021	0
Dabrafenib	NRAS_Q61	-0.232565	0.0860169	0.595091	1
BX-912	XPO1_E571	-0.564681	0.0860683	0.595091	0
Gefitinib	TP53_R248	1.05722	0.0861708	0.595404	0
XMD13-2	TP53_H179	0.466591	0.0863375	0.596159	0
THZ-2-102-1	TP53_C242	0.554735	0.0864241	0.596361	0
AZD6244	NRAS_Q61	-0.876031	0.0866902	0.597564	1
ABT-888	STK11_S216	0.912108	0.0867135	0.597564	0
Bosutinib	PIK3CA_E545	0.888161	0.086884	0.597934	1
QL-XI-92	SMAD4_R361	1.02133	0.0868262	0.597934	0
ZSTK474	TP53_R248	-0.205197	0.0869398	0.597934	0
NVP-BHG712	CTNNB1_S37	-0.670631	0.087055	0.597935	0
XMD14-99	TP53_M237	0.594374	0.087043	0.597935	0
Bleomycin	TP53_G244	0.986041	0.0872587	0.598247	0
HG-6-64-1	TP53_G245	0.429569	0.0872252	0.598247	0
GSK1070916	PIK3CA_E542	0.448024	0.0872732	0.598247	1
PF-562271	TP53_R248	-1.05101	0.0876984	0.598418	0
CI-1040	TP53_C242	0.652915	0.0877989	0.598418	0
Paclitaxel	TP53_S241	-0.724214	0.0875206	0.598418	0
GSK269962A	PIK3CA_C420	0.935106	0.0878739	0.598418	1
SGC0946	TP53_R248	0.694449	0.0877295	0.598418	0
JQ1	TP53_R282	0.548517	0.0877412	0.598418	0
AZD7762	TP53_R248	-0.219122	0.0878131	0.598418	0
GSK1070916	TP53_R273	0.58552	0.0875772	0.598418	0
Nutlin-3a	STK11_S216	0.873828	0.0875135	0.598418	0
CHIR-99021	XPO1_E571	-0.72878	0.0878178	0.598418	0
AICAR	TP53_C242	0.662184	0.0880716	0.599371	0
Bicalutamide	TP53_R280	-0.897747	0.0884752	0.600995	0
CAY10603	CTNNB1_S33	0.840146	0.0884869	0.600995	0
ZM-447439	TP53_R110	-0.796148	0.0887091	0.600995	0
NVP-BHG712	PIK3CA_E545	0.301503	0.088715	0.600995	1
AKT inhibitor VIII	CTNNB1_S33	0.950412	0.0886936	0.600995	0
ZSTK474	CTNNB1_S37	-0.734637	0.0884433	0.600995	0
AZD6244	PPP2R1A_R183	-0.921971	0.0885645	0.600995	0
LY317615	TP53_P152	-0.876615	0.089221	0.603983	0
BMS-754807	XPO1_E571	-0.711743	0.0892723	0.603983	0
KIN001-270	RAC1_P29	-0.808399	0.0894114	0.60437	0
AC220	TP53_R248	-1.00979	0.0894458	0.60437	0
CCT007093	PIK3CA_E542	0.492108	0.0895297	0.604543	1
ATRA	SMAD2_R321	0.867512	0.0896125	0.60471	0
QL-XII-47	CTNNB1_S33	0.90256	0.0902075	0.604945	0
(5Z)-7-Oxozeaenol	BRAF_V600	-0.70823	0.0901646	0.604945	1
Zibotentan, ZD4054	TP53_R248	0.804569	0.0900231	0.604945	0
RO-3306	PIK3CA_E545	-0.889751	0.0900669	0.604945	1
THZ-2-49	CDK4_R24	-0.768229	0.0899007	0.604945	0
PHA-793887	CTNNB1_S37	-0.663073	0.0899897	0.604945	0
Doxorubicin	TP53_H179	0.557127	0.0899421	0.604945	0
QL-XI-92	XPO1_E571	-0.562941	0.0901098	0.604945	0
THZ-2-102-1	PIK3CA_E542	0.484251	0.0902295	0.604945	1
SB52334	BRAF_V600	-0.687085	0.0902045	0.604945	1
EX-527	PIK3CA_E545	-0.863257	0.0905933	0.605901	1
AV-951	XPO1_E571	-0.576901	0.0905719	0.605901	0
SL 0101-1	TP53_R282	0.609867	0.0906203	0.605901	0
XAV 939	TP53_P152	0.925594	0.0905352	0.605901	0
AT-7519	PIK3CA_E542	-0.962745	0.0906635	0.605901	1
AKT inhibitor VIII	SMAD4_R361	0.943807	0.0908396	0.606297	0
MS-275	BRAF_V600	-1.17544	0.0907956	0.606297	1
rTRAIL	TP53_R249	-0.620868	0.0909139	0.606404	0
Tamoxifen	BRAF_V600	0.20454	0.0911746	0.606703	1
RO-3306	TP53_G262	0.950841	0.0912232	0.606703	0
MPS-1-IN-1	SMAD2_R321	0.959691	0.0913091	0.606703	0
Mitomycin C	BRAF_V600	-0.773115	0.0911695	0.606703	1
IOX2	BRAF_V600	-0.690884	0.0912859	0.606703	1
Mitomycin C	TP53_R248	-0.240196	0.0913081	0.606703	0
SB52334	PIK3CA_E545	0.34391	0.0915589	0.607311	1
YM201636	PIK3CA_E542	-1.00127	0.0915843	0.607311	1
FTI-277	TP53_R273	0.579582	0.0916344	0.607311	0
NPK76-II-72-1	TP53_H179	0.433105	0.0915666	0.607311	0
Dabrafenib	TP53_G244	0.552303	0.0919207	0.608821	0
TPCA-1	CTNNB1_S37	-0.680846	0.0922466	0.610202	0
BMS-345541	TP53_R248	-0.192803	0.0922117	0.610202	0
FMK	TP53_G245	0.385692	0.0925722	0.611954	0
Thapsigargin	TP53_R273	-1.03517	0.0926293	0.611954	0
Temozolomide	U2AF1_S34	-0.732751	0.0930211	0.612966	0
FMK	TP53_R249	-0.716854	0.0930775	0.612966	0
BMN-673	U2AF1_S34	-0.762646	0.0929018	0.612966	0
SB590885	TP53_R248	0.697268	0.0929687	0.612966	0
CAL-101	TP53_R273	0.577981	0.092887	0.612966	0
FTI-277	PIK3CA_E542	0.540392	0.0939243	0.613387	1
WZ3105	TP53_P152	0.779876	0.0939546	0.613387	0
WZ3105	BRAF_V600	0.184729	0.0935394	0.613387	1
STF-62247	TP53_R273	-0.975167	0.0932896	0.613387	0
RDEA119 (rescreen)	TP53_R248	-1.04304	0.0932404	0.613387	0
Tubastatin A	NFE2L2_D77	0.652253	0.093376	0.613387	0
SNX-2112	TP53_R280	0.821184	0.0939514	0.613387	0
Axitinib	TP53_S241	0.608521	0.0934268	0.613387	0
OSU-03012	TP53_S241	0.526752	0.0935573	0.613387	0
AICAR	TP53_S241	0.593932	0.0937842	0.613387	0
DMOG	TP53_R267	-0.676113	0.0936079	0.613387	0
DMOG	SMAD4_R361	0.871374	0.0939676	0.613387	0
GSK269962A	TP53_S241	0.849295	0.0938393	0.613387	0
GW-2580	PIK3CA_C420	0.881068	0.0938001	0.613387	1
MS-275	TP53_G245	0.525463	0.094169	0.614315	0
GSK429286A	SMAD4_R361	0.698535	0.0942952	0.614368	0
NSC-207895	SMAD4_R361	0.741536	0.0942921	0.614368	0
TGX221	TP53_S241	-0.674838	0.094491	0.614486	0
SN-38	SMAD4_R361	0.879939	0.0945181	0.614486	0
JNK-9L	TP53_H179	-0.54377	0.0944299	0.614486	0
AR-42	TP53_R110	0.592637	0.0945499	0.614486	0
CEP-701	SMAD2_R321	0.873834	0.0946255	0.614592	0
AT-7519	TP53_M237	0.606067	0.0948874	0.615909	0
HG-6-64-1	CDK4_R24	0.866012	0.0950147	0.61623	0
AUY922	NRAS_Q61	-0.269288	0.0950555	0.61623	1
GSK429286A	TP53_R273	-0.939472	0.0951197	0.616262	0
FMK	CTNNB1_S33	0.821966	0.0952145	0.616492	0
ATRA	TP53_R248	-0.768501	0.0958194	0.618866	0
GSK-650394	RAC1_P29	-0.93132	0.0958065	0.618866	0
Nutlin-3a	CTNNB1_S37	-0.850327	0.0957153	0.618866	0
PF-562271	CDK4_R24	0.925243	0.0956598	0.618866	0
AZD8055	TP53_G244	0.60751	0.0959144	0.619095	0
SB590885	TP53_M237	0.649063	0.0960369	0.619501	0
AT-7519	TP53_R273	0.546458	0.0963523	0.621149	0
Temsirolimus	TP53_G245	0.394121	0.0965642	0.62213	0
Temozolomide	XPO1_E571	-0.649854	0.0966864	0.622531	0
Camptothecin	PIK3CA_E542	0.49433	0.0972389	0.623835	1
MK-2206	PPP2R1A_R183	-0.917897	0.0970919	0.623835	0
Bicalutamide	TP53_H179	0.557388	0.0969593	0.623835	0
5-Fluorouracil	CTNNB1_S33	0.80235	0.0973091	0.623835	0
AZ628	TP53_S241	0.605508	0.0971503	0.623835	0
Dasatinib	NRAS_Q61	0.310316	0.0971594	0.623835	1
I-BET	CDK4_R24	0.725472	0.0973075	0.623835	0
Gefitinib	TP53_R248	-0.98279	0.0973955	0.624004	0
Genentech Cpd 10	TP53_G262	-0.705171	0.0978725	0.625373	0
Nutlin-3a	TP53_R248	0.951824	0.0979	0.625373	0
Etoposide	TP53_G244	-0.71267	0.0979102	0.625373	0
KIN001-055	PIK3CA_C420	-0.886824	0.0977644	0.625373	1
BMS-754807	TP53_R248	0.900052	0.0977044	0.625373	0
Nilotinib	TP53_R248	-0.75321	0.0979894	0.625495	0
Pyrimethamine	BRAF_V600	-1.007	0.0981085	0.625871	1
BIRB 0796	NRAS_Q61	0.838177	0.0981871	0.625988	1
GSK1070916	TP53_R110	0.579387	0.0982742	0.626159	0
Cyclopamine	TP53_R273	0.990452	0.0983717	0.626396	0
NVP-BEZ235	PIK3CA_E545	-0.358885	0.0984359	0.626422	1
Doxorubicin	CTNNB1_S37	-0.811849	0.0986054	0.626732	0
PIK-93	SMAD2_R321	0.891175	0.0985596	0.626732	0
FR-180204	SMAD2_R321	0.920864	0.0988408	0.627845	0
Vinorelbine	STK11_S216	0.798012	0.0989472	0.628137	0
Vinblastine	TP53_R248	0.676062	0.0990742	0.628175	0
KIN001-260	PIK3CA_E542	0.39936	0.0990309	0.628175	1
NSC-87877	U2AF1_S34	0.809868	0.0993824	0.629111	0
RDEA119 (rescreen)	TP53_S241	0.45832	0.0993347	0.629111	0
BMN-673	TP53_H179	0.530293	0.0994034	0.629111	0
Tubastatin A	SMAD2_R321	0.738983	0.0995099	0.629402	0
AZD6482	BRAF_V600	-0.657619	0.0995944	0.629553	1
JQ1	XPO1_E571	-0.709466	0.0998035	0.630491	0
BMS-754807	NRAS_Q61	-0.251791	0.100098	0.631177	1
CHIR-99021	TP53_R282	0.555276	0.100177	0.631177	0
Lenalidomide	TP53_R248	-0.210049	0.100052	0.631177	0
Obatoclax Mesylate	TP53_R273	0.562413	0.100216	0.631177	0
Pazopanib	TP53_R273	0.570364	0.100084	0.631177	0
YK 4-279	TP53_P152	0.916	0.100305	0.631201	0
RDEA119 (rescreen)	SMAD2_R321	-0.744196	0.100341	0.631201	0
JQ12	U2AF1_S34	-0.79495	0.100607	0.631952	0
Vorinostat	FBXW7_R479	0.698657	0.100543	0.631952	0
Trametinib	CTNNB1_S33	-0.747751	0.100643	0.631952	0
CX-5461	BRAF_V600	0.191622	0.100776	0.632408	1
AICAR	STK11_S216	0.820699	0.100937	0.633033	0
KIN001-270	BRAF_V600	0.184268	0.101023	0.633188	1
ZM-447439	PIK3CA_E545	0.364567	0.10127	0.63321	1
KIN001-270	TP53_R110	0.552612	0.101245	0.63321	0
SB-505124	SMAD2_R321	0.882787	0.10118	0.63321	0
BI-2536	BRAF_V600	-1.06217	0.101221	0.63321	1
AMG-706	NRAS_Q61	0.830407	0.101447	0.633445	1
Dabrafenib	FBXW7_R479	0.587299	0.10154	0.633445	0
SN-38	TP53_G262	0.859988	0.101783	0.633445	0
JW-7-24-1	SMAD4_R361	0.682949	0.101795	0.633445	0
rTRAIL	TP53_R248	0.678259	0.101652	0.633445	0
Ruxolitinib	TP53_R282	0.487872	0.101735	0.633445	0
AT-7519	TP53_R248	-0.915157	0.101388	0.633445	0
QL-X-138	STK11_S216	0.705754	0.101639	0.633445	0
BMS-536924	TP53_R248	0.737267	0.101968	0.633763	0
UNC0638	NRAS_Q61	-0.214005	0.101956	0.633763	1
Vismodegib	TP53_S241	0.606527	0.102072	0.634031	0
FTI-277	XPO1_E571	-0.705003	0.102456	0.635461	0
AP-24534	PIK3CA_C420	0.814259	0.102486	0.635461	1
(5Z)-7-Oxozeaenol	NRAS_Q61	-0.832359	0.102461	0.635461	1
Vorinostat	PPP2R1A_R183	-0.799432	0.102574	0.635631	0
S-Trityl-L-cysteine	BRAF_V600	-1.10513	0.102706	0.636067	1
YM201636	SMAD4_R361	0.86943	0.102991	0.636662	0
TPCA-1	PIK3CA_E542	0.418776	0.103453	0.636662	1
PD-173074	TP53_R282	0.567484	0.103336	0.636662	0
KIN001-244	CTNNB1_S33	0.805101	0.10317	0.636662	0
Nilotinib	TP53_H179	0.395929	0.10342	0.636662	0
SN-38	TP53_R248	-1.00186	0.103222	0.636662	0
EX-527	PIK3CA_C420	0.836522	0.102966	0.636662	1
AZD6482	PIK3CA_E545	0.330381	0.102912	0.636662	1
CUDC-101	NRAS_Q61	-0.241287	0.103476	0.636662	1
Zibotentan, ZD4054	SMAD4_R361	0.702167	0.103414	0.636662	0
Embelin	NRAS_Q61	-0.800102	0.103188	0.636662	1
KIN001-102	SMAD4_R361	0.879139	0.1037	0.636895	0
TG101348	CTNNB1_S33	0.748459	0.103759	0.636895	0
FTI-277	BRAF_V600	-0.218492	0.103669	0.636895	1
BAY 61-3606	CTNNB1_S37	-0.75386	0.103731	0.636895	0
Afatinib (rescreen)	TP53_R267	0.653766	0.104079	0.637001	0
SB-715992	TP53_R248	-0.198655	0.104191	0.637001	0
PI-103	TP53_G244	-0.927122	0.10443	0.637001	0
GW 441756	PIK3CA_C420	0.916321	0.104012	0.637001	1
BIX02189	SMAD2_R321	0.910978	0.104353	0.637001	0
AS605240	PIK3CA_E542	-0.986467	0.103974	0.637001	1
BX-912	PIK3CA_C420	0.753845	0.104396	0.637001	1
BMS-345541	PIK3CA_E542	-0.959155	0.104278	0.637001	1
WZ3105	NRAS_Q61	-0.216759	0.104314	0.637001	1
SB-715992	FBXW7_R479	0.640932	0.103842	0.637001	0
SB-505124	TP53_R248	0.729618	0.104451	0.637001	0
Methotrexate	TP53_R248	-0.6583	0.10493	0.637057	0
GDC0941 (rescreen)	XPO1_E571	-0.64082	0.105052	0.637057	0
PF-562271	TP53_R248	-0.229647	0.104664	0.637057	0
UNC0638	BRAF_V600	-0.613245	0.105068	0.637057	1
QL-XII-47	NRAS_Q61	-0.247573	0.104636	0.637057	1
SN-38	PIK3CA_E545	0.341493	0.104917	0.637057	1
BMS-708163	NRAS_Q61	-0.232612	0.104789	0.637057	1
LFM-A13	TP53_R249	-0.767793	0.104551	0.637057	0
I-BET	CTNNB1_S33	0.710033	0.104864	0.637057	0
Cisplatin	TP53_R110	-0.620168	0.105073	0.637057	0
RDEA119	BRAF_V600	-0.678004	0.105189	0.637215	1
SB-715992	BRAF_V600	0.196231	0.105221	0.637215	1
BX-795	TP53_R248	0.63389	0.105972	0.63729	0
XMD13-2	PIK3CA_E542	-0.974489	0.106154	0.63729	1
KIN001-055	BRAF_V600	0.205314	0.105708	0.63729	1
PHA-793887	TP53_G244	-0.911483	0.106032	0.63729	0
STF-62247	SMAD4_R361	0.937148	0.105769	0.63729	0
OSI-027	STK11_S216	0.707699	0.105343	0.63729	0
T0901317	CTNNB1_S37	-0.654692	0.105839	0.63729	0
SB-715992	TP53_R110	0.582248	0.105607	0.63729	0
XMD15-27	PIK3CA_E542	0.436956	0.105865	0.63729	1
Temsirolimus	U2AF1_S34	0.850862	0.105948	0.63729	0
BMS-345541	BRAF_V600	0.181963	0.105721	0.63729	1
LAQ824	BRAF_V600	-0.744358	0.105887	0.63729	1
NPK76-II-72-1	CDK4_R24	0.717326	0.105456	0.63729	0
Lenalidomide	TP53_S241	0.830761	0.106154	0.63729	0
PLX4720	CTNNB1_S37	-0.811102	0.10581	0.63729	0
VNLG/124	TP53_C242	0.487782	0.106255	0.637531	0
Etoposide	TP53_R249	-0.777844	0.106713	0.63778	0
(5Z)-7-Oxozeaenol	HRAS_Q61	-0.797373	0.106698	0.63778	0
17-AAG	TP53_G244	0.563316	0.106551	0.63778	0
Dabrafenib	TP53_R282	0.528167	0.106726	0.63778	0
NVP-BHG712	SMAD2_R321	0.937782	0.106705	0.63778	0
YK 4-279	TP53_R248	0.23665	0.106706	0.63778	0
I-BET	SMAD2_R321	0.706173	0.106383	0.63778	0
QL-VIII-58	TP53_M237	0.851068	0.108216	0.638866	0
KU-55933	TP53_H179	0.495621	0.107568	0.638866	0
Tubastatin A	TP53_R248	0.721168	0.108068	0.638866	0
QL-XII-47	TP53_R273	0.547742	0.107964	0.638866	0
BIX02189	CTNNB1_S33	0.734914	0.10789	0.638866	0
Methotrexate	PPP2R1A_R183	-0.679628	0.107367	0.638866	0
GSK429286A	SMAD4_R361	0.90243	0.108048	0.638866	0
BMS-708163	U2AF1_S34	0.697614	0.107035	0.638866	0
Olaparib	TP53_S241	0.598443	0.107955	0.638866	0
QL-XI-92	CTNNB1_S33	0.754233	0.107748	0.638866	0
YK 4-279	TP53_C242	-0.633557	0.108228	0.638866	0
AS605240	STK11_S216	0.724394	0.107392	0.638866	0
CP724714	XPO1_E571	-0.630974	0.107947	0.638866	0
NG-25	TP53_C242	0.472173	0.108115	0.638866	0
BX-795	TP53_C242	0.66409	0.108089	0.638866	0
HG-5-113-01	PIK3CA_E542	0.530512	0.107922	0.638866	1
AUY922	TP53_R273	-0.980449	0.107	0.638866	0
PFI-1	PIK3CA_C420	0.850631	0.108258	0.638866	1
XMD8-85	TP53_R248	-0.973009	0.107305	0.638866	0
CUDC-101	TP53_D259	0.818644	0.108261	0.638866	0
Etoposide	TP53_R110	0.632984	0.107947	0.638866	0
BMS-708163	TP53_S241	0.465475	0.108218	0.638866	0
NVP-BHG712	SMAD2_R321	0.726442	0.108382	0.639223	0
GSK-1904529A	U2AF1_S34	0.783042	0.109092	0.639934	0
KIN001-260	NRAS_Q61	-0.202063	0.109027	0.639934	1
EHT 1864	TP53_R282	0.544016	0.108868	0.639934	0
AKT inhibitor VIII	PIK3CA_E542	-0.518433	0.108994	0.639934	1
Bexarotene	TP53_R248	0.838948	0.109027	0.639934	0
XMD11-85h	BRAF_V600	-0.245035	0.108639	0.639934	1
UNC0638	PIK3CA_E545	0.286208	0.108894	0.639934	1
YM155	CTNNB1_S37	-0.873297	0.108756	0.639934	0
EHT 1864	XPO1_E571	-0.62713	0.109119	0.639934	0
XMD14-99	SMAD2_R321	0.717784	0.108926	0.639934	0
Dabrafenib	TP53_R248	0.181309	0.109378	0.640169	0
YK 4-279	BRAF_V600	-0.76146	0.110576	0.640169	1
NU-7441	BRAF_V600	-0.219367	0.11009	0.640169	1
SB-715992	TP53_M237	0.628502	0.110535	0.640169	0
PHA-793887	TP53_R273	0.530852	0.109462	0.640169	0
XL-880	SMAD2_R321	0.908017	0.109227	0.640169	0
Elesclomol	SMAD2_R321	0.858791	0.110539	0.640169	0
XAV 939	CTNNB1_S37	-0.758166	0.109584	0.640169	0
PFI-1	PIK3CA_E542	0.443894	0.11026	0.640169	1
Gefitinib	FBXW7_R479	0.72606	0.10994	0.640169	0
XMD14-99	XPO1_E571	-0.507973	0.109329	0.640169	0
NVP-BEZ235	TP53_G244	0.948483	0.110411	0.640169	0
ABT-263	FBXW7_R479	0.636114	0.11045	0.640169	0
KIN001-236	TP53_R248	0.99202	0.110138	0.640169	0
Dabrafenib	TP53_R267	-0.573998	0.109551	0.640169	0
AS605240	TP53_R248	-0.199924	0.109671	0.640169	0
GDC0941 (rescreen)	TP53_R248	0.218228	0.11053	0.640169	0
AT-7519	FBXW7_R479	0.579856	0.110123	0.640169	0
UNC0638	TP53_G244	-0.906541	0.109972	0.640169	0
WH-4-023	NRAS_Q61	0.31637	0.109886	0.640169	1
ABT-888	TP53_R282	0.523595	0.109637	0.640169	0
CP466722	TP53_S241	0.458209	0.109778	0.640169	0
I-BET	PIK3CA_E545	0.273404	0.110173	0.640169	1
GDC0941 (rescreen)	TP53_R280	0.889157	0.111358	0.640404	0
LFM-A13	TP53_R248	0.972651	0.111296	0.640404	0
ZM-447439	TP53_R248	0.957988	0.11108	0.640404	0
ZSTK474	BRAF_V600	0.187377	0.111722	0.640404	1
SB-715992	XPO1_E571	-0.572604	0.111776	0.640404	0
NVP-BEZ235	TP53_G244	0.611646	0.111595	0.640404	0
Obatoclax Mesylate	NRAS_Q61	-0.808079	0.111198	0.640404	1
Obatoclax Mesylate	TP53_R273	-0.983616	0.111793	0.640404	0
Gemcitabine	TP53_H179	0.510707	0.111564	0.640404	0
RDEA119	TP53_R273	-0.591639	0.110992	0.640404	0
FH535	CDK4_R24	-0.870863	0.111386	0.640404	0
WZ3105	STK11_S216	0.642184	0.111642	0.640404	0
Paclitaxel	FBXW7_R479	0.868469	0.111698	0.640404	0
NU-7441	PIK3CA_E545	-0.848886	0.111659	0.640404	1
CX-5461	TP53_M237	0.609761	0.111739	0.640404	0
Genentech Cpd 10	TP53_R248	0.871493	0.111711	0.640404	0
PHA-665752	FBXW7_R479	0.897471	0.111849	0.640404	0
YM155	U2AF1_S34	-0.750672	0.111759	0.640404	0
XMD14-99	NRAS_Q61	-0.204097	0.111617	0.640404	1
KIN001-266	SMAD2_R321	0.841149	0.111789	0.640404	0
PF-562271	NRAS_Q61	-0.257004	0.111941	0.640578	1
BMN-673	TP53_G244	0.590124	0.112171	0.64154	0
FTI-277	PIK3CA_C420	-0.882866	0.112334	0.641767	1
Tubastatin A	BRAF_V600	-0.621903	0.112333	0.641767	1
UNC1215	TP53_R248	-0.65735	0.112491	0.641967	0
VX-11e	TP53_R110	0.572657	0.112616	0.641967	0
Temozolomide	TP53_R273	-0.84757	0.112541	0.641967	0
DMOG	CTNNB1_S33	0.824712	0.112609	0.641967	0
FMK	TP53_S241	0.480027	0.11288	0.642416	0
GSK2126458	CTNNB1_S33	0.810932	0.112812	0.642416	0
PLX4720 (rescreen)	TP53_M237	0.608801	0.112874	0.642416	0
Temsirolimus	TP53_G244	0.936322	0.112985	0.642662	0
LY317615	STK11_S216	0.709408	0.11309	0.642903	0
AP-24534	SMAD4_R361	0.789682	0.113212	0.643247	0
Elesclomol	TP53_H179	0.492757	0.113488	0.644465	0
piperlongumine	BRAF_V600	-0.202603	0.113674	0.645165	1
Epothilone B	TP53_R282	0.542012	0.113974	0.645812	0
CP466722	TP53_P152	-0.78062	0.113959	0.645812	0
AS605240	BRAF_V600	-0.665644	0.113966	0.645812	1
Bosutinib	TP53_R248	-0.203719	0.114386	0.646382	0
TG101348	TP53_R248	-0.174764	0.114233	0.646382	0
Temsirolimus	TP53_S241	0.813219	0.114364	0.646382	0
THZ-2-49	CTNNB1_S37	-0.714596	0.114139	0.646382	0
BAY 61-3606	U2AF1_S34	-0.73227	0.11434	0.646382	0
JQ12	NFE2L2_D77	-0.764415	0.114572	0.646732	0
GW-2580	TP53_R273	0.507274	0.114553	0.646732	0
OSI-906	TP53_R248	0.857664	0.115401	0.646843	0
FTI-277	BRAF_V600	-0.659831	0.115293	0.646843	1
Etoposide	TP53_G245	0.408299	0.115067	0.646843	0
Temsirolimus	RAC1_P29	0.828269	0.115362	0.646843	0
GNF-2	TP53_R273	0.339868	0.115359	0.646843	0
JNJ-26854165	TP53_R280	-0.842789	0.115257	0.646843	0
XMD14-99	BRAF_V600	-0.634746	0.114884	0.646843	1
FK866	TP53_R248	-0.969422	0.114958	0.646843	0
KIN001-236	TP53_C242	0.474271	0.114739	0.646843	0
AZD8055	TP53_G262	0.811294	0.115052	0.646843	0
AZD7762	TP53_R267	0.695437	0.114707	0.646843	0
GW-2580	BRAF_V600	0.196158	0.114819	0.646843	1
YM201636	TP53_G262	-0.667921	0.115131	0.646843	0
JW-7-52-1	BRAF_V600	-1.14054	0.115544	0.647293	1
IPA-3	CTNNB1_S37	-0.717456	0.115636	0.647463	0
MLN4924	U2AF1_S34	-0.743832	0.117111	0.647534	0
JQ1	TP53_R248	-0.623601	0.117317	0.647534	0
AZ628	TP53_R273	0.323855	0.116695	0.647534	0
Tubastatin A	TP53_G244	-0.498229	0.116437	0.647534	0
Y-39983	TP53_R282	0.460407	0.116908	0.647534	0
QL-VIII-58	TP53_R273	-0.936428	0.116555	0.647534	0
ABT-263	TP53_G244	-0.511641	0.116407	0.647534	0
TAK-715	TP53_R273	0.537924	0.116089	0.647534	0
Camptothecin	PIK3CA_E545	0.323453	0.11674	0.647534	1
QS11	TP53_R267	-0.661965	0.11699	0.647534	0
AT-7519	BRAF_V600	-0.612231	0.117281	0.647534	1
CI-1040	TP53_G244	0.909432	0.116193	0.647534	0
WZ3105	PIK3CA_E542	0.402005	0.116529	0.647534	1
JNK Inhibitor VIII	NRAS_Q61	0.808309	0.116076	0.647534	1
Cytarabine	TP53_H179	0.481311	0.117323	0.647534	0
JNK Inhibitor VIII	PIK3CA_C420	0.880016	0.116755	0.647534	1
MK-2206	RAC1_P29	0.869754	0.116222	0.647534	0
NPK76-II-72-1	TP53_G244	-0.492971	0.116156	0.647534	0
PAC-1	TP53_R273	0.506362	0.117331	0.647534	0
FK866	BRAF_V600	-0.628938	0.117214	0.647534	1
Bosutinib	U2AF1_S34	0.800955	0.116867	0.647534	0
Bexarotene	NFE2L2_D77	-0.745408	0.115954	0.647534	0
QL-X-138	FBXW7_R479	0.606008	0.116277	0.647534	0
BMS-708163	TP53_R110	-0.640072	0.115822	0.647534	0
PLX4720	TP53_R273	-0.845655	0.116828	0.647534	0
WZ-1-84	TP53_R273	-0.373823	0.117241	0.647534	0
QS11	TP53_R280	-0.852989	0.117025	0.647534	0
17-AAG	BRAF_V600	-0.679425	0.117492	0.648078	1
XL-184	TP53_G245	0.347752	0.117736	0.648393	0
CX-5461	FBXW7_R479	0.599814	0.117721	0.648393	0
Cetuximab	PIK3CA_E545	-0.351573	0.117678	0.648393	1
Mitomycin C	TP53_S241	-0.500997	0.118049	0.648948	0
Pyrimethamine	TP53_G244	0.75617	0.117942	0.648948	0
Axitinib	PIK3CA_C420	0.800587	0.118087	0.648948	1
LY317615	PIK3CA_E542	-0.899491	0.118038	0.648948	1
PHA-793887	TP53_R248	-0.170146	0.118153	0.648967	0
JNK-9L	BRAF_V600	-0.21297	0.118484	0.649501	1
MPS-1-IN-1	TP53_R282	0.45663	0.118349	0.649501	0
QL-XI-92	TP53_R282	0.449286	0.118452	0.649501	0
CHIR-99021	TP53_R273	0.21906	0.1185	0.649501	0
LAQ824	TP53_R248	-0.215345	0.118764	0.650023	0
FTI-277	CTNNB1_S33	0.86888	0.118783	0.650023	0
TPCA-1	TP53_M237	0.565708	0.118728	0.650023	0
CUDC-101	TP53_G244	-0.919355	0.118985	0.650471	0
BAY 61-3606	TP53_R282	0.512422	0.119166	0.650471	0
Bleomycin (50 uM)	PPP2R1A_R183	-0.798487	0.11915	0.650471	0
SN-38	STK11_S216	0.709639	0.119037	0.650471	0
MK-2206	CTNNB1_S33	0.862632	0.119178	0.650471	0
GSK690693	TP53_P152	-0.738834	0.119361	0.65113	0
PHA-793887	BRAF_V600	-0.611652	0.119625	0.651979	1
CP724714	TP53_M237	-0.667578	0.119705	0.651979	0
SN-38	TP53_R248	0.617832	0.119669	0.651979	0
rTRAIL	NRAS_Q61	-0.79184	0.119898	0.652343	1
AICAR	U2AF1_S34	-0.778085	0.119841	0.652343	0
BX-912	PIK3CA_E542	0.396949	0.12006	0.652852	1
QS11	PPP2R1A_R183	0.846834	0.120117	0.652852	0
ZSTK474	TP53_R110	0.599222	0.120772	0.65388	0
SNX-2112	TP53_H179	0.440608	0.120878	0.65388	0
Lenalidomide	SMAD2_R321	-0.955279	0.120471	0.65388	0
GW843682X	FBXW7_R479	0.860806	0.12051	0.65388	0
UNC0638	TP53_D259	-0.707351	0.120842	0.65388	0
CH5424802	PIK3CA_E545	0.296702	0.120858	0.65388	1
BMS-708163	TP53_G262	-0.891561	0.120641	0.65388	0
QL-X-138	PIK3CA_E542	-0.93591	0.120828	0.65388	1
JNK Inhibitor VIII	TP53_G245	0.405596	0.120856	0.65388	0
BMN-673	TP53_P152	0.811875	0.120935	0.65388	0
SGC0946	STK11_S216	0.717509	0.121046	0.654139	0
FR-180204	TP53_S241	0.450839	0.12127	0.65501	0
17-AAG	TP53_R248	-0.627838	0.121392	0.655328	0
GSK-1904529A	TP53_R110	0.617345	0.121483	0.655479	0
JNK-9L	TP53_G262	-0.752905	0.121548	0.655487	0
CP466722	TP53_H179	0.443506	0.12176	0.656293	0
BMS-708163	PPP2R1A_R183	-0.887776	0.122044	0.657142	0
KIN001-266	RAC1_P29	-0.817837	0.121986	0.657142	0
ABT-888	TP53_C242	-0.638027	0.122286	0.658101	0
Methotrexate	TP53_R273	0.501672	0.122506	0.658947	0
PI-103	PIK3CA_E545	0.81831	0.12304	0.659087	1
I-BET	TP53_R110	0.478094	0.123022	0.659087	0
AICAR	TP53_S241	0.765333	0.122987	0.659087	0
Masitinib	TP53_R282	0.442468	0.12264	0.659087	0
ABT-888	TP53_S241	0.798757	0.122817	0.659087	0
ABT-263	PIK3CA_E545	-0.820586	0.122801	0.659087	1
TGX221	TP53_G245	-0.467435	0.122913	0.659087	0
IPA-3	PPP2R1A_R183	0.81248	0.122987	0.659087	0
AC220	TP53_R248	-0.181235	0.123353	0.659819	0
AG-014699	PIK3CA_E542	-0.914302	0.123275	0.659819	1
Camptothecin	TP53_S241	-0.766225	0.123367	0.659819	0
Vinblastine	TP53_H179	0.480889	0.124005	0.660094	0
CCT007093	PIK3CA_E545	-0.325022	0.123563	0.660094	1
XL-184	TP53_S241	0.468947	0.123676	0.660094	0
AMG-706	PIK3CA_C420	0.86227	0.123851	0.660094	1
Thapsigargin	PIK3CA_E542	0.499813	0.123559	0.660094	1
ABT-869	TP53_R282	0.488403	0.123899	0.660094	0
RO-3306	HRAS_Q61	0.864908	0.12392	0.660094	0
GSK429286A	TP53_M237	0.574451	0.124054	0.660094	0
Methotrexate	STK11_S216	0.650221	0.123993	0.660094	0
WH-4-023	TP53_R248	-0.91658	0.123658	0.660094	0
FK866	TP53_R110	0.591385	0.124198	0.66041	0
AT-7519	U2AF1_S34	-0.623141	0.12424	0.66041	0
MK-2206	NRAS_Q61	0.7882	0.12444	0.661134	1
Tubastatin A	PIK3CA_C420	-0.687719	0.124571	0.661154	1
THZ-2-102-1	PIK3CA_E542	-0.886403	0.124525	0.661154	1
QL-XII-61	PIK3CA_E542	0.501841	0.12508	0.661829	1
AC220	TP53_H179	0.434666	0.124985	0.661829	0
Etoposide	BRAF_V600	-0.667121	0.12481	0.661829	1
Z-LLNle-CHO	TP53_G244	0.793552	0.124885	0.661829	0
QL-X-138	CTNNB1_S33	0.763333	0.125023	0.661829	0
BMS-708163	CTNNB1_S37	-0.762759	0.125013	0.661829	0
AZD8055	U2AF1_S34	-0.788646	0.12523	0.662284	0
YM201636	TP53_H179	0.43481	0.125505	0.663401	0
YK 4-279	TP53_R248	0.946975	0.125743	0.663985	0
NG-25	SMAD4_R361	0.820867	0.125696	0.663985	0
AC220	BRAF_V600	0.177002	0.126109	0.664011	1
KIN001-244	TP53_R248	-0.67419	0.125968	0.664011	0
QL-X-138	TP53_R273	-0.916083	0.125876	0.664011	0
BMS-754807	TP53_R110	-0.585138	0.126239	0.664011	0
OSI-930	SMAD4_R361	0.627764	0.12643	0.664011	0
XMD15-27	TP53_C242	0.49294	0.1261	0.664011	0
NSC-87877	BRAF_V600	-0.208937	0.126451	0.664011	1
YM155	TP53_R282	-0.511158	0.126439	0.664011	0
GSK1070916	CTNNB1_S37	-0.598178	0.125922	0.664011	0
EX-527	SMAD4_R361	0.679681	0.126184	0.664011	0
ZG-10	RAC1_P29	0.821129	0.126374	0.664011	0
GSK-1904529A	NRAS_Q61	-0.243705	0.127475	0.664098	1
GDC0941	PPP2R1A_R183	-0.849916	0.129705	0.664098	0
Bleomycin (50 uM)	TP53_G244	0.868176	0.129046	0.664098	0
OSU-03012	TP53_R280	-0.822806	0.128296	0.664098	0
GSK1070916	TP53_M237	0.530876	0.130046	0.664098	0
ZG-10	TP53_R282	0.81559	0.129504	0.664098	0
JNK Inhibitor VIII	PIK3CA_E542	0.467888	0.129504	0.664098	1
CH5424802	TP53_R248	-0.900325	0.129357	0.664098	0
THZ-2-102-1	CTNNB1_S37	-0.748008	0.128748	0.664098	0
PFI-1	TP53_G245	0.352444	0.127223	0.664098	0
A-770041	TP53_S241	-0.627834	0.128169	0.664098	0
CHIR-99021	SMAD4_R361	0.838619	0.127474	0.664098	0
PD-0325901	FBXW7_R479	-0.62802	0.128842	0.664098	0
RDEA119	TP53_S241	0.496882	0.12847	0.664098	0
Afatinib	TP53_R282	0.485213	0.128063	0.664098	0
FK866	XPO1_E571	-0.537121	0.126745	0.664098	0
AV-951	TP53_S241	-0.692838	0.127482	0.664098	0
BX-912	TP53_R273	0.502613	0.127689	0.664098	0
PLX4720	TP53_R110	-0.659358	0.129467	0.664098	0
BIRB 0796	NRAS_Q61	-0.256569	0.12976	0.664098	1
[truncated: 8,393 more rows]
